# Supplementary material for: Diastereoselective 1,2-difunctionalization of 1,3-enynes enabled by merging photoexcited Hantzsch ester with chromium catalysis
Source: Royal Society of Chemistry journal article supplement (doi:10.1039/d3qo01522j), 2023-10-20

## Supporting Information

### Diastereoselective 1,2-Difunctionalization of 1,3-Enynes Enabled by Merging Photoexcited Hantzsch Ester with Chromium Catalysis

Jia Wu,<sup>a</sup> Xiangyu Xu,<sup>a</sup> Chongwen Duan,<sup>a</sup> Shan Chen,<sup>a</sup> Dan Wang,<sup>a</sup> Likui Fang,<sup>a</sup>  
Weiyang Tang,<sup>b</sup> Fusheng Li<sup>a\*</sup>

<sup>a</sup>School of Chemistry and Chemical Engineering, University of South China, Hengyang 421001, China

<sup>b</sup>School of Pharmacy, Hangzhou Normal University, Hangzhou 311121, China

Email: [LFS1083657902@163.com](mailto:LFS1083657902@163.com); [LFS1083657902@usc.edu.cn](mailto:LFS1083657902@usc.edu.cn)

### Table of Contents

|                                                    |    |
|----------------------------------------------------|----|
| 1. General remarks .....                           | 2  |
| 2. Photochemical reaction setup .....              | 2  |
| 3. General procedures of the reaction .....        | 3  |
| 4. The procedure of large-scale .....              | 3  |
| 5. Mechanistic investigation .....                 | 3  |
| 5.1 UV-visible spectra absorption analysis .....   | 3  |
| 5.2 Radical probing experiment I .....             | 4  |
| 5.3 Radical probing experiment II .....            | 5  |
| 5.4 Light on/off experiment .....                  | 5  |
| 5.5 Quantum yield calculation <sup>[4]</sup> ..... | 6  |
| 6. DFT calculations .....                          | 7  |
| 7. Report of the NMR spectra .....                 | 11 |
| 8. NMR spectra of the products .....               | 23 |

**05 December 2023 - Note added after first publication:** This Supplementary Information file replaces that originally published on 20 October 2023. The spectra for compounds 4a-4z, 4aa-4ac, 5 and 7a-7b have been updated with the correct data.

## 1. General remarks

Unless otherwise noted, the commercially available reagents were used directly without further purification. All reactions were performed under nitrogen gas atmosphere. Anhydrous solvents were directly purchased from Energy Chemical and stored under nitrogen gas. Thin layer chromatography (TLC) was performed using Huanghai TLC silica gel plates HSGF254 and visualized using UV light or potassium permanganate ( $\text{KMnO}_4$ ). Flash column chromatography was performed using 200-300 mesh silica gel. The  $^1\text{H}$  NMR,  $^{13}\text{C}$  NMR and  $^{19}\text{F}$  NMR spectra were recorded on a Bruker AV-400 MHz with  $\text{CDCl}_3$  (7.26 ppm for  $^1\text{H}$  NMR, 77.0 ppm for  $^{13}\text{C}$  NMR) as solvent. Data are reported as follows: chemical shift  $\delta/\text{ppm}$ , integration ( $^1\text{H}$  only), multiplicity (s = singlet, d = doublet, t = triplet, q = quartet, m = multiplet or combinations thereof;  $^{13}\text{C}$  signals are singlets unless otherwise stated), coupling constants  $J$  in Hz, assignment. High Resolution Mass Spectrometry (HRMS) were recorded on HPLC-Q-TOF mass spectrometer. The measured HRMS values are reported to 4 decimal places of the calculated value. The UV-Vis data were obtained from HP 8453 spectrometer.

## 2. Photochemical reaction setup

Household blue LED strips (30 W, 400-410 nm) were coiled around the inside of an aluminium ware with 15 cm diameter (Figure S1, left). The maximum emission of the LED strips at 405 nm (Figure S1, right). The Quartz glass was used as reaction vessel at room temperature.

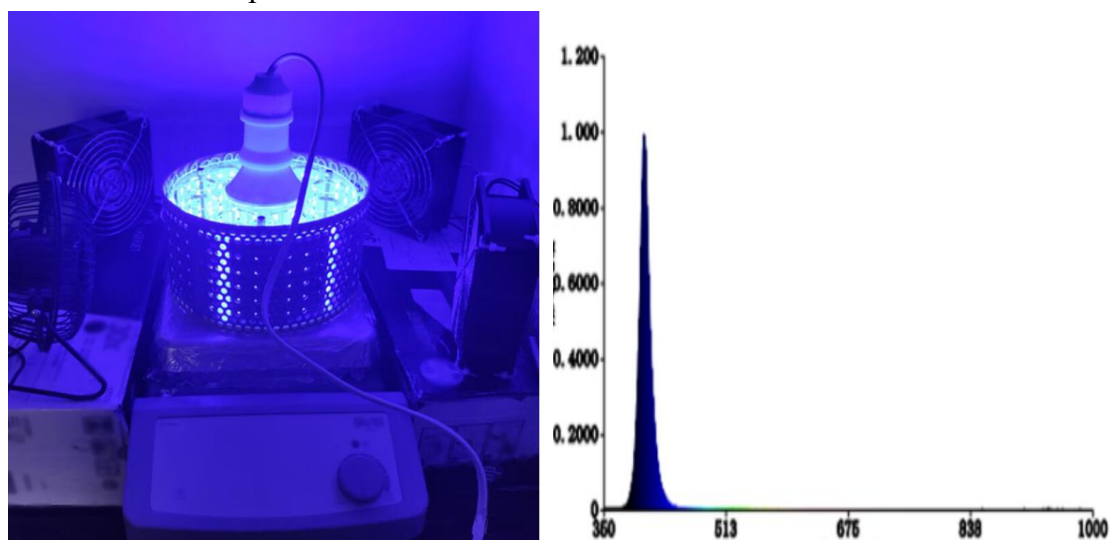

Figure S1. Reaction setup (left) and the emission spectra (right)

### 3. General procedures of the reaction

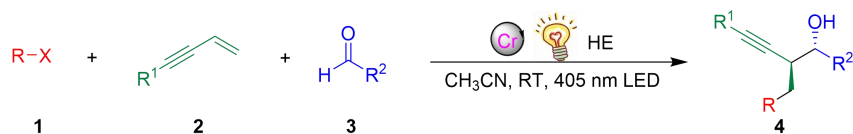

An oven-dried Schlenk tube equipped with an stirring bar was charged under nitrogen gas with the corresponding alkyl halides (**1**, 2.0 equiv.), 1,3-enyne (**2**, 2.0 equiv.), aldehyde (**3**, 0.2 mmol), Hantzsch ester (HE, 2.0 equiv.),  $CrCl_2$  (10 mol%), and  $CH_3CN$  (0.2 M, 1.0 mL). The reaction mixture was then degassed by freeze-pump-thaw for three times, then the vessel was back-filled with nitrogen gas. The substrate was added after degassed when it's a liquid. Subsequently, the reaction was stirred at room temperature under blue LEDs irradiation (30 W, 400-410 nm) for 12 h. The reaction solution was concentrated in vacuo and filtered through a pad of silica gel by washing with EtOAc. The obtained crude reaction mixture was then concentrated for  $^1H$  NMR spectroscopy to determine the diastereomeric ratio. The mixture solution was purified by column chromatography on silica gel (pentane/EtOAc) to afford the corresponding compounds.

All 1,3-enynes were prepared from the alkynes and vinyl bromide according to the previous reports.<sup>[1, 2]</sup>

### 4. The procedure of large-scale

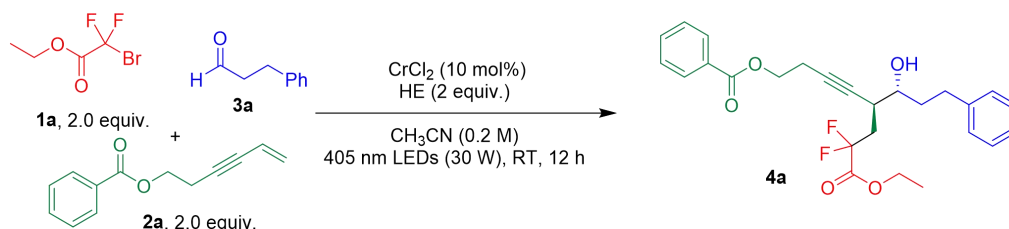

Based on the general procedure, 3-phenylpropionaldehyde **3a** (10 mmol, 1.34 g), 1,3-enyne **2a** (20 mmol), and ethyl bromodifluoroacetate **1a** (20 mmol), Hantzsch ester (HE, 20 mmol),  $CrCl_2$  (1 mmol), and  $CH_3CN$  (0.2 M, 50 mL) were stirred at room temperature under blue LEDs irradiation (30 W, 400-410 nm) for 12 h. The reaction solution was concentrated in vacuo and filtered through a pad of silica gel by washing with EtOAc. The obtained crude reaction mixture was then concentrated for  $^1H$  NMR spectroscopy to determine the diastereomeric ratio. The mixture solution was purified by column chromatography on silica gel (pentane/EtOAc) to afford the corresponding compounds **4a** (3.57 g, 78%).

### 5. Mechanistic investigation

#### 5.1 UV-visible spectra absorption analysis

A variety of solution of  $BrCF_2COOEt$ , HE, and HE+ $BrCF_2COOEt$  with different concentration in  $CH_3CN$  were prepared. Then the UV-visible absorption spectra of a series of solutions were recorded on HP 8453 spectrometer.

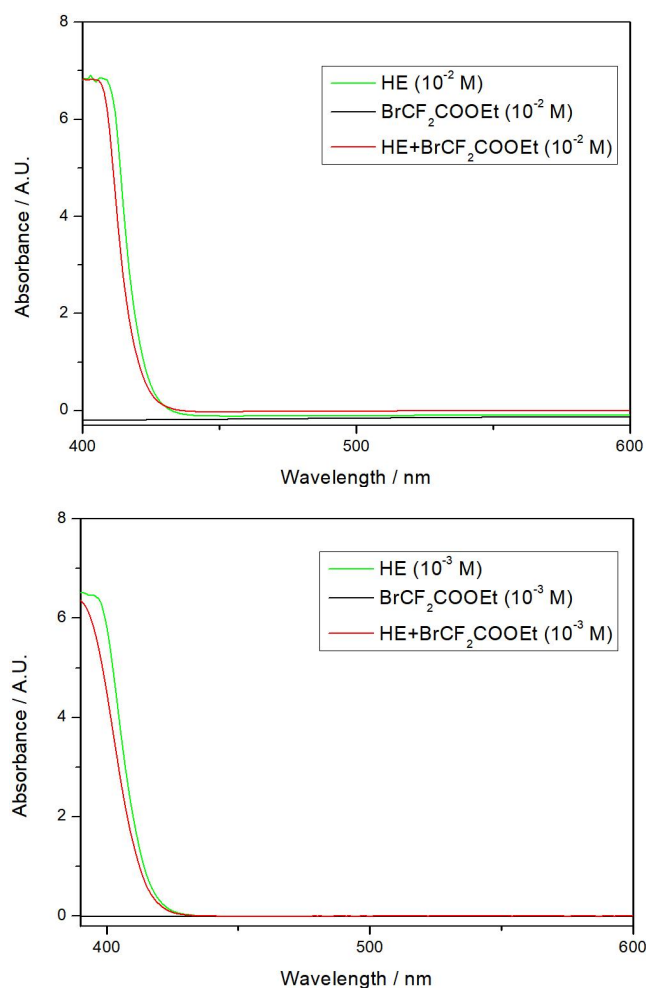

Figure S2. UV-visible absorption spectra of BrCF<sub>2</sub>COOEt, HE, and HE+BrCF<sub>2</sub>COOEt in CH<sub>3</sub>CN

## 5.2 Radical probing experiment I

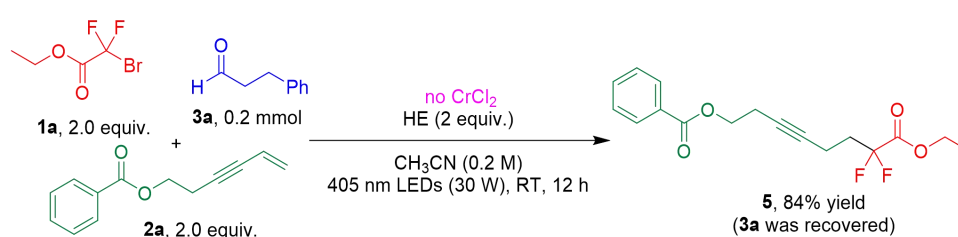

According to the general procedure, the reaction was equipped with 3-phenylpropionaldehyde **3a**, 1,3-enyne **2a**, and ethyl bromodifluoroacetate **1a**, Hantzsch ester (HE, 2.0 equiv.), and CH<sub>3</sub>CN (0.2 M, 1.0 mL) and stirred at room temperature under blue LEDs irradiation for 12 h. The reaction solution was concentrated in vacuo and then purified by column chromatography on silica gel (pentane/EtOAc = 50:1) to afford **5** as a colorless oil.

### 5.3 Radical probing experiment II

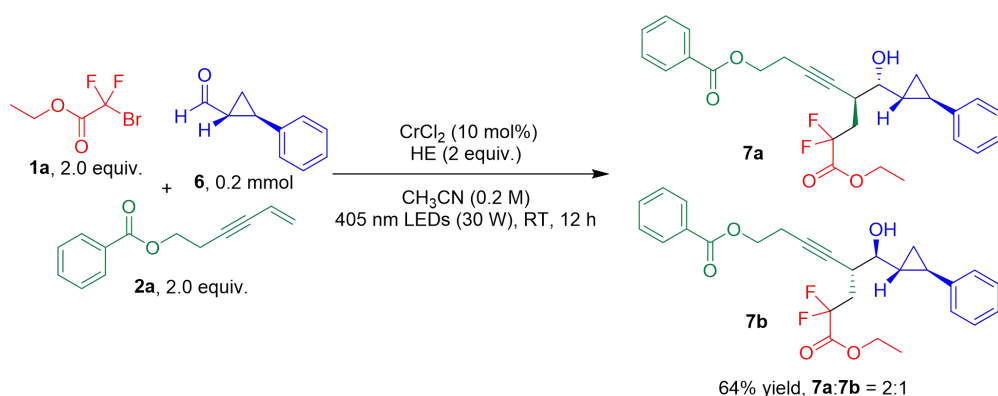

2-phenylcyclopropane-1-carboxaldehyde **6** was used to further explore the reaction mechanism. An oven-dried Schlenk tube equipped with a stirring bar was charged under nitrogen gas with the corresponding **6**, 1,3-enyne **2a**, and ethyl bromodifluoroacetate **1a**, Hantzsch ester (HE, 2.0 equiv.),  $\text{CrCl}_2$  (10 mol%), and  $\text{CH}_3\text{CN}$  (0.2 M, 1.0 mL) and stirred at room temperature under blue LEDs irradiation for 12 h. The reaction solution was concentrated in vacuo and then purified by column chromatography on silica gel (pentane/EtOAc = 10:1) to afford colorless oil **7a** and **7b** in 2:1 ratio.

### 5.4 Light on/off experiment

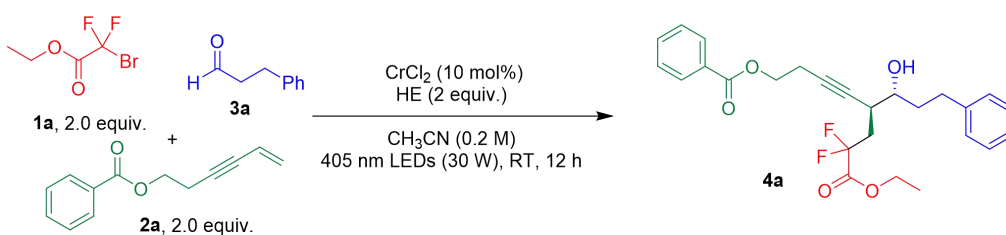

The light on/off experiment of the model reaction was performed parallelly on a 1.0 mmol scale according to the general procedure by adding 1.0 equiv. 1,3,5-trimethoxybenzene as internal standard. The reaction started with successive irradiation and black periods to study the influence of continuous irradiation of the visible-light for the progress photochemical reaction. After being irradiated with 30 W blue LEDs for 1 h, an aliquot (200  $\mu\text{L}$ ) from the reaction mixture was transferred into a flask and then concentrated. The yield of the desired product **4a** was determined by  $^1\text{H}$  NMR. The reaction was then stirred with light-off for 1 h and the yield was determined by  $^1\text{H}$  NMR. All of the following yields were analyzed in the identical way after a 1 h light on or light-off. These results revealed that light is a necessary component of the reaction.

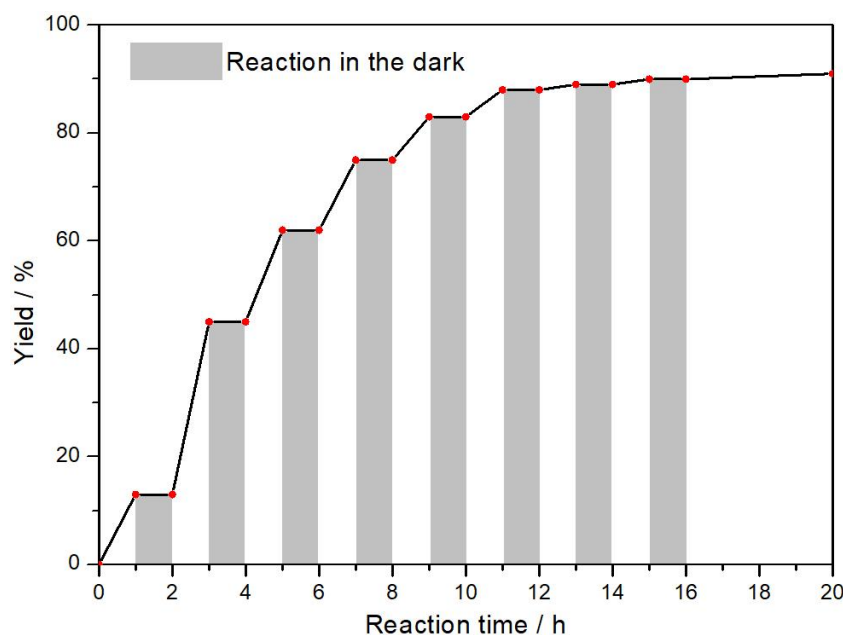

Figure S3. Time profile of the transformation with light on/off over time

### 5.5 Quantum yield calculation<sup>[4]</sup>

(A) Determination of light intensity at 436 nm:

0.737 g of potassium ferrioxalate trihydrate was dissolved in 10 mL H<sub>2</sub>SO<sub>4</sub> (0.05 M) and stored in the dark. Then, a buffer solution was prepared by dissolving 2.25 g of sodium acetate and 10 mg of phenanthroline in 10 mL of H<sub>2</sub>SO<sub>4</sub> (0.5 M).

General protocol to assess the photon flux of the 436 nm blue LEDs: 3.0 mL of the ferrioxalate solution was placed in a cuvette containing a stirring bar and irradiated for 90.0 seconds at  $\lambda = 436$  nm with an emission slit width at 10.0 nm. After irradiation, 0.525 mL of the phenanthroline solution was added to the cuvette. The solution was then allowed to stir for 1.0 h in the dark to allow the ferrous ions to completely coordinate to the phenanthroline. The absorbance of this solution was then measured at 510 nm by UV-vis spectrophotometry. The number of moles of Fe<sup>2+</sup> produced by light irradiation is obtained by:

$$n(\text{Fe}^{2+}) = \frac{V \times \Delta A}{l \times \epsilon} \quad (1)$$

Where:

V is the total volume (0.003525 L) of the solution after addition of phenanthroline;

$\Delta A$  is the difference in absorbance at 510 nm between the irradiated and non-irradiated solutions;

l is the path length (1.000 cm);

$\epsilon$  is the molar absorptivity at 510 nm (11,100 L mol<sup>-1</sup> cm<sup>-1</sup>).

The photon flux (F) is obtained by using the following equation:

$$F = \frac{n(\text{Fe}^{2+})}{\Phi \times t \times f} \quad (2)$$

Where:

$\Phi$  is the quantum yield for the ferrioxalate actinometer (1.01 for a 0.15 M solution at  $\lambda = 436$  nm);

$t$  is the time (90.0 s);

$f$  is the fraction of light absorbed at  $\lambda = 436$  nm.

The photon flux was calculated to be  $1.58 \times 10^{-9}$  einstein  $s^{-1}$ .

(B) Quantum yield calculation of the reaction:

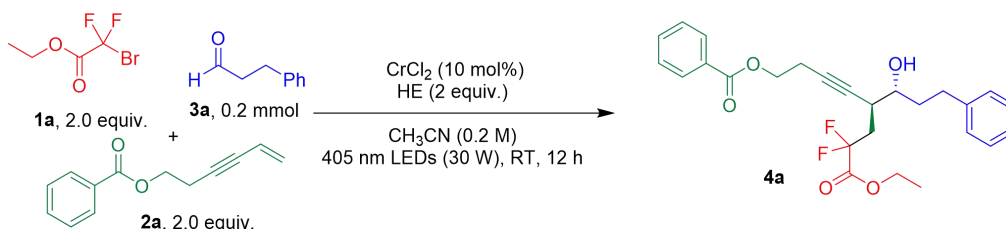

Following the standard procedure, an oven-dried Schlenk tube equipped with an stirring bar was charged under nitrogen gas with the corresponding alkyl halides (**1**, 2.0 equiv.), 1,3-enyne (**2**, 2.0 equiv.), aldehyde (**3**, 0.2 mmol), Hantzsch ester (HE, 2.0 equiv.), CrCl<sub>2</sub> (10 mol%), and CH<sub>3</sub>CN (0.2 M, 1.0 mL). The reaction mixture was then degassed by freeze-pump-thaw for three times, then the vessel was back-filled with nitrogen gas. The substrate was added after degassed when it's a liquid. Subsequently, the reaction was stirred at room temperature under blue LEDs irradiation ( $\lambda = 405$  nm, slit width = 10.0 nm) for 4 h. After irradiation, the yield was determined by <sup>1</sup>H NMR analysis using 1,3,5-trimethoxybenzene as an internal standard. The yield was determined to be 1.8% ( $3.6 \times 10^{-6}$  mol). The reaction quantum yield ( $\Phi$ ) was determined using eq. 3 where the photon flux is  $1.58 \times 10^{-9}$  einsteins  $s^{-1}$  (determined by actinometry as described above),  $t$  is the reaction time (14400 s) and  $f$  is the fraction of incident light absorbed by the reaction mixture ( $f = 1 - 10^{-A}$ , 0.996).

$$\Phi = \frac{n(\text{product})}{F \times t \times f} \quad (3)$$

The reaction quantum yield ( $\Phi$ ) was thus determined to be  $\Phi = 0.16$ .

## 6. DFT calculations

**Computational Methods:** All of the density functional theory (DFT) calculations were performed with the Gaussian 16<sup>[5]</sup> series of programs. The B3LYP functional<sup>[6]</sup> including Grimme empirical dispersion correction (GD3BJ)<sup>[7]</sup> with the standard 6-31G(d) basis set (SDD basis set for Cr) was used for the geometry optimizations in the gas phase. Harmonic vibrational frequency calculations were performed for all of the stationary points to determine whether they are transition structures and to derive the thermochemical corrections for free

energies. The M06L functional<sup>[8]</sup> proposed by Truhlar et al. with the 6-311+G(d,p) basis set (SDD basis set for Cr) was used to calculate the single-point energies. The solvent effect was considered by applying the implicit SMD<sup>[9]</sup> solvation model with MeCN as solvent in single-point energy calculations. The 3D images of the calculated structures were prepared using CYLview.<sup>[10]</sup>

***Cartesian (Å) Coordinates and Energies of Optimized Structures.***

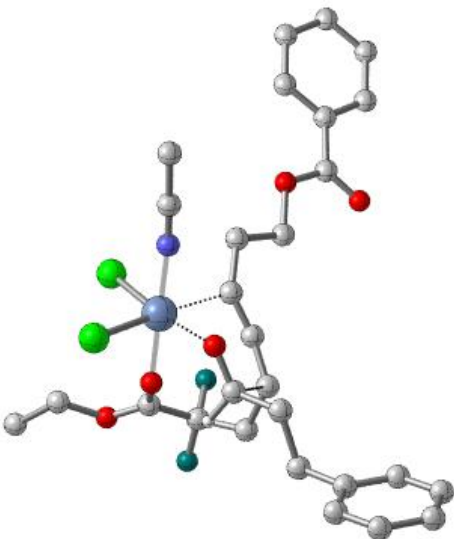

|    |             |             |             |    |             |             |             |
|----|-------------|-------------|-------------|----|-------------|-------------|-------------|
| Cr | 0.59783400  | -1.56806900 | 1.24741900  | C  | 4.34144500  | 1.95562400  | -0.41542800 |
| Cl | 2.00632700  | -2.80719100 | 2.53407700  | H  | 3.84486100  | 2.01278000  | -1.39111700 |
| C  | 1.33525400  | 0.70244700  | -1.40287400 | H  | 5.05077700  | 1.11990800  | -0.47072700 |
| C  | 0.18479400  | 0.35972100  | -0.77283500 | H  | 3.05331300  | -0.42531200 | -0.10079200 |
| C  | -0.62215100 | -0.06338700 | 0.10692100  | Cl | -1.00347900 | -3.11990800 | 0.75234600  |
| C  | 2.57292700  | 0.35227500  | 0.49704500  | C  | -2.08685900 | 0.04063300  | 0.36341900  |
| O  | 1.73707600  | 0.00812000  | 1.38801300  | H  | -2.25765600 | 0.38499900  | 1.39036800  |
| H  | 1.59779100  | 1.75856900  | -1.41341000 | H  | -2.53950100 | -0.95288800 | 0.29232800  |
| C  | 1.93265100  | -0.09501800 | -2.55020000 | C  | -2.75548500 | 0.99955900  | -0.61210400 |
| H  | 1.78178800  | 0.42846800  | -3.50335900 | H  | -2.64172600 | 0.65770300  | -1.64535000 |
| H  | 3.01980800  | -0.18780300 | -2.42361900 | H  | -2.33816600 | 2.00790700  | -0.54149400 |
| C  | 1.38896000  | -1.49751600 | -2.78677200 | C  | 1.56234500  | -2.49932100 | -1.62770200 |
| C  | 3.30298900  | 1.65898700  | 0.67840600  | O  | 1.60541800  | -2.13249800 | -0.46064000 |
| H  | 3.80785400  | 1.60792600  | 1.65397700  | O  | 1.65084700  | -3.74079600 | -2.01804600 |
| H  | 2.57603400  | 2.47553500  | 0.76158800  | C  | 1.73541100  | -4.75726400 | -0.95332800 |
|    |             |             |             | H  | 0.80848200  | -4.69721800 | -0.38043800 |
|    |             |             |             | H  | 2.56284800  | -4.47781400 | -0.29663100 |
|    |             |             |             | C  | 1.93629400  | -6.09126200 | -1.63537600 |
|    |             |             |             | H  | 1.09638500  | -6.32390600 | -2.29694600 |
|    |             |             |             | H  | 2.85992900  | -6.10384400 | -2.22250900 |
|    |             |             |             | F  | 0.04682500  | -1.45555000 | -3.05320500 |
|    |             |             |             | F  | 2.00421200  | -2.00771500 | -3.89473300 |
|    |             |             |             | C  | -0.95086400 | -0.77931500 | 3.86503700  |
|    |             |             |             | N  | -0.40054000 | -1.01117700 | 2.87764400  |
|    |             |             |             | C  | -1.64345900 | -0.50712200 | 5.11569300  |
|    |             |             |             | H  | -1.11271600 | -0.98621200 | 5.94427100  |
|    |             |             |             | H  | -2.66456300 | -0.89838900 | 5.07103400  |
|    |             |             |             | H  | -1.68206100 | 0.57177000  | 5.29459600  |
|    |             |             |             | C  | 5.08335100  | 3.24455600  | -0.14983200 |
|    |             |             |             | C  | 6.23955800  | 3.25549900  | 0.63954700  |
|    |             |             |             | C  | 4.59906200  | 4.46053300  | -0.64644200 |
|    |             |             |             | C  | 6.89706300  | 4.45194400  | 0.92604300  |
|    |             |             |             | H  | 6.62820500  | 2.31739900  | 1.02948000  |
|    |             |             |             | C  | 5.25280600  | 5.65980800  | -0.36274500 |
|    |             |             |             | H  | 3.70334800  | 4.46600000  | -1.26392300 |
|    |             |             |             | C  | 6.40481500  | 5.65855600  | 0.42542000  |

**TS-Re**  
 E(UB3LYP) = -2723.157401 Hartree  
 E(UM06L) = -2723.414443 Hartree  
 Thermal Correction to Energy = 0.575420 Hartree  
 Thermal Correction to Enthalpy = 0.576365 Hartree  
 Thermal Correction to Free Energy = 0.446891 Hartree



|   |              |             |             |    |             |             |             |
|---|--------------|-------------|-------------|----|-------------|-------------|-------------|
| H | 7.79562800   | 4.44140300  | 1.53668400  | C  | 1.79158100  | 0.02837300  | -2.17808400 |
| H | 4.86505600   | 6.59367200  | -0.76021200 | O  | 1.01915200  | 1.00269200  | -1.91479600 |
| H | 6.91738800   | 6.59073300  | 0.64499200  | H  | 0.85035200  | -2.32546100 | -1.95607700 |
| O | -4.15562000  | 1.03782900  | -0.27430100 | C  | 1.77590700  | -2.39865900 | 0.03779500  |
| C | -4.90262600  | 1.93239900  | -0.95737000 | H  | 1.60628400  | -3.48270300 | 0.08195500  |
| O | -4.44270400  | 2.68179800  | -1.79764800 | H  | 2.83502600  | -2.26947200 | -0.21279100 |
| C | -6.33697500  | 1.89233300  | -0.56012600 | C  | 1.61323600  | -1.92437800 | 1.47544500  |
| C | -6.82508000  | 0.98255500  | 0.38694100  | Cl | -0.59521400 | 2.13772700  | 1.80648800  |
| C | -7.21006200  | 2.80177900  | -1.17031500 | C  | -2.41513600 | 0.17085800  | -0.16154800 |
| C | -8.17837900  | 0.98694700  | 0.71936200  | H  | -2.78195800 | 1.04743500  | -0.70738100 |
| H | -6.14375200  | 0.27849400  | 0.85028700  | H  | -2.53524900 | 0.40430900  | 0.90111500  |
| C | -8.56109600  | 2.80405200  | -0.83432500 | C  | -3.24812800 | -1.04780900 | -0.53576000 |
| H | -6.80794200  | 3.49372800  | -1.90241500 | H  | -2.94285200 | -1.92916700 | 0.03653300  |
| C | -9.04656800  | 1.89659000  | 0.11095700  | H  | -3.16083300 | -1.28846900 | -1.59891600 |
| H | -8.55718900  | 0.27954800  | 1.45144100  | C  | 1.90908700  | -0.43360800 | 1.73201100  |
| H | -9.23647500  | 3.51031200  | -1.30838600 | O  | 1.69951000  | 0.41920700  | 0.88057600  |
| H | -10.10123800 | 1.89715900  | 0.37203100  | O  | 2.39852000  | -0.18765200 | 2.91676800  |
| H | 2.00063900   | -6.87383300 | -0.87219500 | C  | 2.63965200  | 1.23004000  | 3.23923900  |

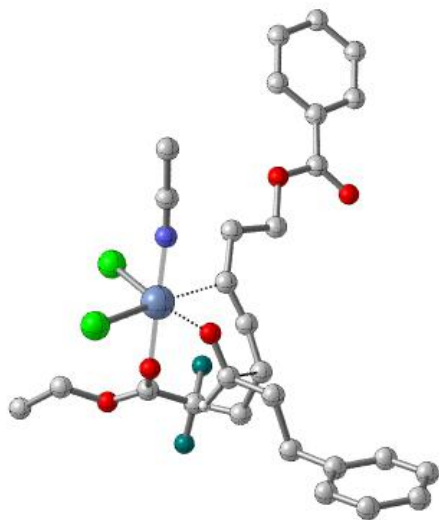

#### TS-Si

E(UB3LYP) = -2723.149836 Hartree

E(UM06L) = -2723.406769 Hartree

Thermal Correction to Energy = 0.575419 Hartree

Thermal Correction to Enthalpy = 0.576363 Hartree

Thermal Correction to Free Energy = 0.447940 Hartree

|    |             |             |             |   |            |             |             |
|----|-------------|-------------|-------------|---|------------|-------------|-------------|
| Cr | 0.48950500  | 1.68475700  | -0.15497200 | C | 5.38658900 | -1.33597900 | -1.77745400 |
| Cl | 2.08305700  | 3.31307200  | -0.15980700 | C | 6.37551500 | -0.34986100 | -1.89487700 |
| C  | 0.88134000  | -1.76994900 | -1.01981500 | C | 5.66857300 | -2.47735700 | -1.01813900 |
| C  | -0.21162200 | -1.03317300 | -0.68820600 | C | 7.61071400 | -0.49936000 | -1.26648000 |
| C  | -0.97159100 | -0.05051200 | -0.45591500 | H | 6.17420400 | 0.54200000  | -2.48365200 |

|   |             |             |             |   |              |             |             |
|---|-------------|-------------|-------------|---|--------------|-------------|-------------|
| C | 6.90404100  | -2.63138300 | -0.38609100 | C | -7.19902000  | -0.06437800 | 0.45495200  |
| H | 4.91695500  | -3.25830100 | -0.92786200 | C | -7.96618700  | -2.11743000 | -0.58418300 |
| C | 7.87856700  | -1.64115100 | -0.50737000 | C | -8.51587700  | 0.25977900  | 0.77561800  |
| H | 8.36567400  | 0.27504500  | -1.36998000 | H | -6.38403200  | 0.59431500  | 0.73164500  |
| H | 7.10365800  | -3.52570700 | 0.19760400  | C | -9.28052700  | -1.78925800 | -0.26326000 |
| H | 8.84102000  | -1.75805600 | -0.01761100 | H | -7.72424600  | -3.03495400 | -1.10963200 |
| O | -4.62005300 | -0.73165000 | -0.22891000 | C | -9.55662900  | -0.60021600 | 0.41698400  |
| C | -5.53456300 | -1.65612400 | -0.59437200 | H | -8.73094500  | 1.18228400  | 1.30718100  |
| O | -5.24522400 | -2.69296600 | -1.16053000 | H | -10.08969400 | -2.45849600 | -0.54086300 |
| C | -6.92099100 | -1.25595800 | -0.22755900 | H | -10.58219500 | -0.34475600 | 0.66888600  |

## References:

- [1] Huang, H. M.; Bellotti, P.; Daniliuc, C. G.; Glorius, F. Radical Carbonyl Propargylation by Dual Catalysis. *Angew. Chem. Int. Ed.* 2021, 60, 2464-2471.
- [2] Chen, L.; Lin, C.; Zhang, S.; Zhang, X.; Zhang, J.; Xing, L.; Guo, Y.; Feng, J.; Gao, J.; Du, D. 1,4-Alkylcarbonylation of 1,3-Enynes to Access Tetra-Substituted Allenyl Ketones Via an NHC-Catalyzed Radical Relay. *ACS Catal.* 2021, 11, 13363-13373.
- [3] Pitzer L., Schäfers F., Glorius F. Rapid Assessment of the Reaction-Condition-Based Sensitivity of Chemical Transformations. *Angew. Chem. Int. Ed.* 2019, 58: 8572-8576.
- [4] Cismesia M. A., Yoon T. P. Characterizing Chain Processes in Visible Light Photoredox Catalysis. *Chem. Sci.* 2015, 6: 5426-5434.
- [5] Frisch, M. J.; Trucks, G. W.; Schlegel, H. B.; Scuseria, G. E.; Robb, M. A.; Cheeseman, J. R.; Scalmani, G.; Barone, V.; Men-nucci, B.; Petersson, G. A.; Nakatsuji, H.; Caricato, M.; Li, X.; Hratchian, H. P.; Izmaylov, A. F.; Bloino, J.; Zheng, G.; Sonnenberg, J. L.; Hada, M.; Ehara, M.; Toyota, K.; Fukuda, R.; Hasegawa, J.; Ishida, M.; Nakajima, T.; Honda, Y.; Kitao, O.; Nakai, H.; Vreven, T.; Jr., J. A. M.; Peralta, J. E.; Ogliaro, F.; Bearpark, M.; Heyd, J. J.; Brothers, E.; Kudin, K. N.; Staroverov, V. N.; Ko-bayashi, R.; Normand, J.; Raghavachari, K.; Rendell, A.; Burant, J. C.; Iyengar, S. S.; omasi, J. T.; Cossi, M.; Rega, N.; Millam, J. M.; Klene, M.; Knox, J. E.; Cross, J. B.; Bakken, V.; Adamo, C.; Jaramillo, J.; Gomperts, R.; Stratmann, R. E.; Yazyev, O.; Austin, A. J.; Cammi, R.; Pomelli, C.; Ochterski, J. W.; Martin, R. L.; Morokuma, K.; Zakrzewski, V. G.; Voth, G. A.; Salvador, P.; Dannenberg, J. J.; Dapprich, S.; Daniels, A. D.; Farkas, Ö.; Foresman, J. B.; Ortiz, J. V.; Cio-slawski, J.; Fox, D. J. Gaussian 16, Revision A.03; Gaussian, Inc.: Wallingford, CT, 2016.
- [6] (a) Lee, C.; Yang, W.; Parr, R. G. Development of the Colle-Salvetti correlation-energy formula into a functional of the electron density. *Phys. Rev. B.* 1988, 37, 785; (b) Becke, A. D. Density-functional thermochemistry. III. the role of exact exchange. *J. Chem. Phys.* 1993, 98, 5648.
- [7] Grimme, S.; Antony, J.; Ehrlich, S.; Krieg, H. A consistent and accurate ab initio parametrization of density functional dispersion correction (DFT-D) for the 94 elements H-Pu. *J. Chem. Phys.* 2010, 132, 154104.
- [8] Zhao, Y.; Truhlar, D. G. The M06 suite of density functionals for main group thermochemistry, thermochemical kinetics, noncovalent interactions, excited states, and transition elements: two new functionals and systematic testing of four M06-class functionals and 12 other functionals. *Theor. Chem. Acc.* 2008, 120, 215.
- [9] Marenich, A. V.; Cramer, C. J.; Truhlar, D. G. *J. Phys. Chem. B* 2009, 113, 6378-6396.
- [10] Legault, C. Y. CYLview, 1.0b; Universitéde Sherbrooke.: 2009.

## 7. Report of the NMR spectra

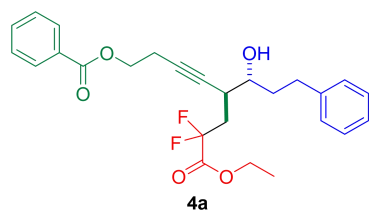

**4a**,  $R_f = 0.5$  (EA:PE=1:3), column solvent: hexane/EtOAc = 10/1, 85%, colorless oil,  $^1\text{H}$  NMR (500 MHz,  $\text{CDCl}_3$ )  $\delta$  8.05 (d,  $J = 7.1$  Hz, 2H), 7.56 (t,  $J = 7.4$  Hz, 1H), 7.43 (t,  $J = 7.8$  Hz, 2H), 7.26 (t,  $J = 7.8$  Hz, 2H), 7.18 (t,  $J = 7.4$  Hz, 1H), 7.15 (d,  $J = 7.1$  Hz, 2H), 4.43 (t,  $J = 6.6$  Hz, 2H), 4.33 – 4.26 (m, 2H), 3.54 – 3.45 (m, 1H), 2.80 – 2.71 (m, 2H), 2.69 – 2.59 (m, 3H), 2.52 – 2.26 (m, 2H), 1.99 – 1.76 (m, 3H), 1.33 (t,  $J = 7.2$  Hz, 3H).  $^{13}\text{C}$  NMR (126 MHz,  $\text{CDCl}_3$ )  $\delta$  166.50, 163.85 (t,  $J = 32.6$  Hz), 141.42, 133.15, 129.76, 129.61, 128.39, 128.35, 125.89, 115.51 (dd,  $J = 251.8, 250.0$  Hz), 80.89, 78.81, 72.40, 62.85, 62.71, 37.07, 37.03 (t,  $J = 22.9$  Hz), 32.68 – 32.37 (m), 31.94, 19.58, 13.87.  $^{19}\text{F}$  NMR (471 MHz,  $\text{CDCl}_3$ )  $\delta$  -103.12 (dt,  $J = 260.3, 14.6$  Hz, 1F), -106.21 (dt,  $J = 36.2, 17.8$  Hz, 1F). HRMS-ESI (m/z)  $[\text{M}+\text{Na}]^+$  calculated for  $\text{C}_{26}\text{H}_{28}\text{F}_2\text{NaO}_5$ , 481.1797, found 481.1795.

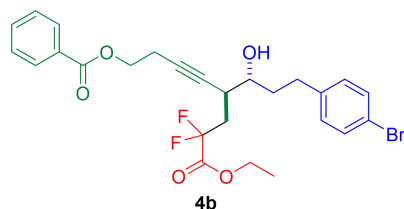

**4b**,  $R_f = 0.6$  (EA:PE=1:3), column solvent: hexane/EtOAc = 10/1, 77%, colorless oil,  $^1\text{H}$  NMR (500 MHz,  $\text{CDCl}_3$ )  $\delta$  8.03 (d,  $J = 7.4$  Hz, 2H), 7.56 (t,  $J = 7.4$  Hz, 1H), 7.42 (t,  $J = 7.7$  Hz, 2H), 7.35 (d,  $J = 8.3$  Hz, 2H), 6.99 (d,  $J = 8.3$  Hz, 2H), 4.43 (t,  $J = 6.4$  Hz, 2H), 4.29 (q,  $J = 7.0$  Hz, 2H), 3.53 – 3.42 (m, 1H), 2.78 – 2.70 (m, 1H), 2.69 – 2.53 (m, 4H), 2.49 – 2.26 (m, 2H), 1.90 – 1.69 (m, 2H), 1.33 (t,  $J = 7.2$  Hz, 3H).  $^{13}\text{C}$  NMR (126 MHz,  $\text{CDCl}_3$ )  $\delta$  166.52, 163.83 (t,  $J = 32.6$  Hz), 140.40, 133.20, 131.41, 130.12, 129.72, 129.60, 128.40, 119.60, 115.46 (dd,  $J = 251.8, 249.9$  Hz), 81.06, 78.70, 72.20, 62.89, 62.68, 37.02 (t,  $J = 22.9$  Hz), 36.93, 32.72 – 32.28 (m), 31.35, 19.62, 13.88.  $^{19}\text{F}$  NMR (471 MHz,  $\text{CDCl}_3$ )  $\delta$  -102.74 – -103.78 (m, 1F), -106.22 (dt,  $J = 36.0, 18.2$  Hz, 1F). HRMS-ESI (m/z)  $[\text{M}+\text{Na}]^+$  calculated for  $\text{C}_{26}\text{H}_{27}\text{BrF}_2\text{NaO}_5$ , 559.0902, found 559.0893.

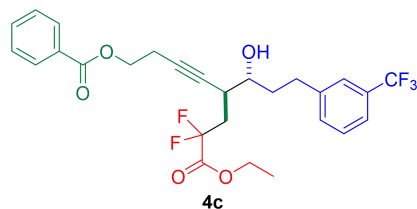

**4c**,  $R_f = 0.5$  (EA:PE=1:3), column solvent: hexane/EtOAc = 10/1, 80%, colorless oil,  $^1\text{H}$  NMR (500 MHz,  $\text{CDCl}_3$ )  $\delta$  8.03 (d,  $J = 7.2$  Hz, 2H), 7.55 (t,  $J = 7.4$  Hz, 1H), 7.46 – 7.38 (m, 4H), 7.36 (t,  $J = 7.7$  Hz, 1H), 7.31 (d,  $J = 7.6$  Hz, 1H), 4.44 (t,  $J = 6.5$  Hz, 2H), 4.34 – 4.24 (m, 2H), 3.56 – 3.43 (m, 1H), 2.85 – 2.60 (m, 5H), 2.49 – 2.27 (m, 2H), 1.96 (s, 1H), 1.91 – 1.75 (m, 2H), 1.33 (t,  $J = 7.2$  Hz, 3H).  $^{13}\text{C}$  NMR (126 MHz,  $\text{CDCl}_3$ )  $\delta$  166.55, 163.83 (t,  $J = 32.6$  Hz), 142.39, 133.20, 131.79, 130.64 (q,  $J = 31.9$  Hz), 129.72, 129.60, 128.80, 128.40, 124.17 (q,  $J = 272.1$  Hz), 125.04 (q,  $J = 3.7$  Hz), 122.81 (q,  $J = 3.6$  Hz), 117.54 – 113.38 (m), 81.16, 78.68, 72.23, 62.91, 62.65, 37.01 (t,  $J = 22.9$  Hz), 36.85, 32.88

– 32.35 (m), 31.78, 19.63, 13.87.  $^{19}\text{F}$  NMR (471 MHz,  $\text{CDCl}_3$ )  $\delta$  -62.50 (s, 3F), -102.87 – -103.65 (m, 1F), -106.21 (dt,  $J$  = 261.4, 18.0 Hz, 1F). HRMS-ESI ( $m/z$ )  $[\text{M}+\text{H}]^+$  calculated for  $\text{C}_{27}\text{H}_{28}\text{F}_5\text{NaO}_5$ , 527.1851, found 527.1862.

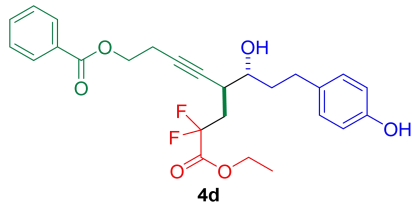

**4d**,  $R_f$  = 0.3 (EA:PE=1:1), column solvent: hexane/EtOAc = 2/1, 82%, colorless oil,  $^1\text{H}$  NMR (500 MHz,  $\text{CDCl}_3$ )  $\delta$  8.04 (d,  $J$  = 7.2 Hz, 2H), 7.56 (t,  $J$  = 7.4 Hz, 1H), 7.43 (t,  $J$  = 7.8 Hz, 2H), 6.99 (d,  $J$  = 8.4 Hz, 2H), 6.73 (d,  $J$  = 8.4 Hz, 2H), 5.30 (s, 1H), 4.42 (t,  $J$  = 6.6 Hz, 2H), 4.29 (qd,  $J$  = 7.1, 1.9 Hz, 2H), 3.58 – 3.42 (m, 1H), 2.79 – 2.70 (m, 1H), 2.68 – 2.52 (m, 4H), 2.47 – 2.25 (m, 2H), 1.92 (s, 1H), 1.86 – 1.71 (m, 2H), 1.33 (t,  $J$  = 7.2 Hz, 3H).  $^{13}\text{C}$  NMR (126 MHz,  $\text{CDCl}_3$ )  $\delta$  166.64, 163.92 (t,  $J$  = 32.6 Hz), 153.86, 133.37, 133.22, 129.72, 129.65, 129.43, 128.43, 115.52 (dd,  $J$  = 251.7, 250.2 Hz), 115.26, 80.86, 78.85, 72.39, 62.92, 62.78, 37.24, 37.02 (t,  $J$  = 23.0 Hz), 32.62 – 32.37 (m), 31.00, 19.59, 13.89.  $^{19}\text{F}$  NMR (471 MHz,  $\text{CDCl}_3$ )  $\delta$  -103.14 (ddd,  $J$  = 260.9, 17.4, 12.9 Hz, 1F), -106.23 (dt,  $J$  = 35.7, 18.1 Hz, 1F). HRMS-ESI ( $m/z$ )  $[\text{M}+\text{Na}]^+$  calculated for  $\text{C}_{26}\text{H}_{28}\text{F}_2\text{NaO}_6$ , 497.1746, found 497.1730.

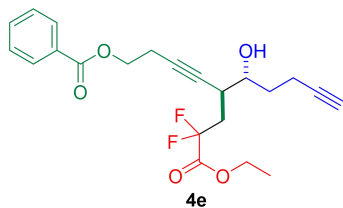

**4e**,  $R_f$  = 0.5 (EA:PE=1:3), column solvent: hexane/EtOAc = 10/1, 66%, colorless oil,  $^1\text{H}$  NMR (500 MHz,  $\text{CDCl}_3$ )  $\delta$  8.04 (d,  $J$  = 7.2 Hz, 2H), 7.57 (t,  $J$  = 7.4 Hz, 1H), 7.45 (t,  $J$  = 7.7 Hz, 2H), 4.43 (t,  $J$  = 6.6 Hz, 2H), 4.34 – 4.27 (m, 2H), 3.75 – 3.62 (m, 1H), 2.80 – 2.71 (m, 1H), 2.68 – 2.58 (m, 2H), 2.50 – 2.31 (m, 2H), 2.31 – 2.21 (m, 2H), 1.98 – 1.90 (m, 2H), 1.80 – 1.63 (m, 2H), 1.34 (t,  $J$  = 7.2 Hz, 3H).  $^{13}\text{C}$  NMR (126 MHz,  $\text{CDCl}_3$ )  $\delta$  166.49, 163.84 (t,  $J$  = 32.6 Hz), 133.18, 129.77, 129.62, 128.42, 115.47 (dd,  $J$  = 251.8, 250.1 Hz), 83.43, 80.99, 78.68, 71.84, 69.01, 62.90, 62.67, 36.91 (t,  $J$  = 23.0 Hz), 33.90, 32.56 – 32.34 (m), 19.58, 14.99, 13.90.  $^{19}\text{F}$  NMR (471 MHz,  $\text{CDCl}_3$ )  $\delta$  -102.84 – -103.65 (m, 1F), -106.19 (dt,  $J$  = 261.6, 18.0 Hz, 1F). HRMS-ESI ( $m/z$ )  $[\text{M}+\text{Na}]^+$  calculated for  $\text{C}_{22}\text{H}_{24}\text{F}_2\text{NaO}_5$ , 429.1484, found 429.1477.

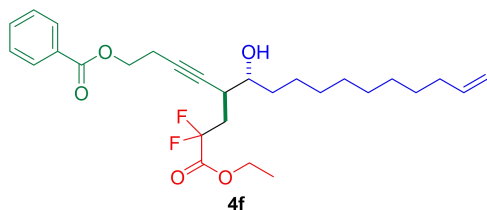

**4f**,  $R_f$  = 0.5 (EA:PE=1:3), column solvent: hexane/EtOAc = 10/1, 60%, colorless oil,  $^1\text{H}$  NMR (500 MHz,  $\text{CDCl}_3$ )  $\delta$  8.05 (d,  $J$  = 7.2 Hz, 2H), 7.57 (t,  $J$  = 7.4 Hz, 1H), 7.44 (t,  $J$  = 7.7 Hz, 2H), 5.90 – 5.71 (m, 1H), 4.96 (dd,  $J$  = 30.7, 13.6 Hz, 2H), 4.45 – 4.38 (m, 2H), 4.34 – 4.27 (m, 2H), 3.53 – 3.44 (m, 1H), 2.77 – 2.69 (m, 1H), 2.65 (td,  $J$  = 6.5, 1.8 Hz, 2H), 2.50 – 2.27 (m, 2H), 2.03 (dd,  $J$  = 14.4, 7.0 Hz, 2H), 1.79 – 1.61 (m, 2H), 1.55 – 1.45 (m, 2H), 1.39 – 1.30 (m, 6H), 1.28 – 1.18 (m, 8H).  $^{13}\text{C}$  NMR

(126 MHz, CDCl<sub>3</sub>) δ 166.47, 163.92 (t, *J* = 32.6 Hz), 139.18, 133.14, 129.82, 129.63, 128.38, 115.60 (dd, *J* = 251.8, 250.1 Hz), 114.10, 80.63, 78.96, 73.22, 62.85, 62.75, 37.14 (t, *J* = 22.9 Hz), 35.56, 33.77, 32.63 – 31.90 (m), 29.47, 29.39, 29.35, 29.06, 28.88, 25.78, 19.57, 13.90. <sup>19</sup>F NMR (471 MHz, CDCl<sub>3</sub>) δ -102.55 – -103.56 (m, 1F), -106.29 (dt, *J* = 36.3, 17.9 Hz, 1F). HRMS-ESI (*m/z*) [M+Na]<sup>+</sup> calculated for C<sub>28</sub>H<sub>38</sub>F<sub>2</sub>NaO<sub>5</sub>, 515.2580, found 515.2572.

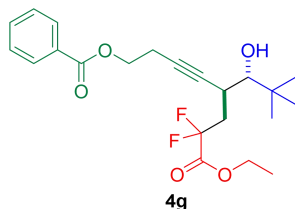

**4g**, *R<sub>f</sub>* = 0.5 (EA:PE=1:3), column solvent: hexane/EtOAc = 10/1, 54%, colorless oil, <sup>1</sup>H NMR (500 MHz, CDCl<sub>3</sub>) δ 8.04 (d, *J* = 7.2 Hz, 2H), 7.57 (t, *J* = 7.4 Hz, 1H), 7.44 (t, *J* = 7.7 Hz, 2H), 4.44 – 4.35 (m, 2H), 4.33 – 4.26 (m, 2H), 3.11 (s, 1H), 3.02 (t, *J* = 6.3 Hz, 1H), 2.67 – 2.60 (m, 2H), 2.56 – 2.26 (m, 2H), 1.91 (s, 1H), 1.34 (t, *J* = 7.1 Hz, 3H), 0.94 (s, 9H). <sup>13</sup>C NMR (126 MHz, CDCl<sub>3</sub>) δ 166.38, 163.85 (t, *J* = 32.7 Hz), 133.13, 129.77, 129.62, 128.37, 115.48 (dd, *J* = 251.8, 250.0 Hz), 82.56, 80.38, 79.41, 62.87, 62.62, 39.71 (t, *J* = 22.6 Hz), 36.04, 28.24 – 27.83 (m), 26.30, 19.52, 13.90. <sup>19</sup>F NMR (471 MHz, CDCl<sub>3</sub>) δ -102.57 – -103.37 (m, 1F), -106.49 (dt, *J* = 261.8, 18.2 Hz, 1F). HRMS-ESI (*m/z*) [M+Na]<sup>+</sup> calculated for C<sub>22</sub>H<sub>28</sub>F<sub>2</sub>NaO<sub>5</sub>, 433.1797, found 433.1794.

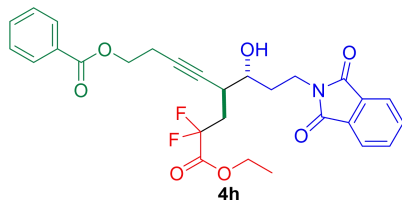

**4h**, *R<sub>f</sub>* = 0.4 (EA:PE=1:3), column solvent: hexane/EtOAc = 5/1, 65%, colorless oil, <sup>1</sup>H NMR (500 MHz, CDCl<sub>3</sub>) δ 8.02 (d, *J* = 7.4 Hz, 2H), 7.85 – 7.79 (m, 2H), 7.73 – 7.68 (m, 2H), 7.53 (t, *J* = 7.4 Hz, 1H), 7.42 (t, *J* = 7.6 Hz, 2H), 4.42 – 4.36 (m, 2H), 4.31 – 4.25 (m, 2H), 3.83 – 3.77 (m, 2H), 3.58 – 3.49 (m, 1H), 2.84 (s, 1H), 2.79 – 2.72 (m, 1H), 2.65 – 2.58 (m, 2H), 2.49 – 2.30 (m, 2H), 1.99 – 1.90 (m, 1H), 1.87 – 1.80 (m, 1H), 1.31 (t, *J* = 7.1 Hz, 3H). <sup>13</sup>C NMR (126 MHz, CDCl<sub>3</sub>) δ 168.69, 166.31, 163.80 (t, *J* = 32.6 Hz), 134.06, 133.02, 131.88, 129.82, 129.58, 128.32, 123.31, 115.47 (dd, *J* = 251.4, 250.1 Hz), 80.59, 78.76, 69.98, 62.83, 62.69, 36.74 (t, *J* = 22.9 Hz), 34.62, 34.02, 32.30 – 31.84 (m), 19.44, 13.85. <sup>19</sup>F NMR (471 MHz, CDCl<sub>3</sub>) δ -102.73 – -103.79 (m, 1F), -106.15 (dt, *J* = 36.1, 17.8 Hz, 1F). HRMS-ESI (*m/z*) [M+Na]<sup>+</sup> calculated for C<sub>28</sub>H<sub>27</sub>F<sub>2</sub>NNaO<sub>7</sub>, 550.1648, found 550.1645.

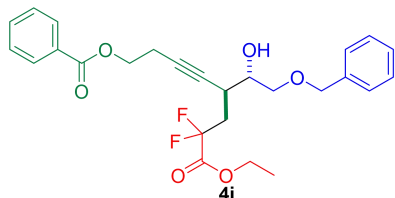

**4i**, *R<sub>f</sub>* = 0.5 (EA:PE=1:3), column solvent: hexane/EtOAc = 10/1, 71%, colorless oil, <sup>1</sup>H NMR (500 MHz, CDCl<sub>3</sub>) δ 8.05 (d, *J* = 7.2 Hz, 2H), 7.56 (t, *J* = 7.4 Hz, 1H), 7.44 (t, *J* = 7.7 Hz, 2H), 7.36 – 7.31 (m, 2H), 7.31 – 7.25 (m, 3H), 4.50 – 4.42 (m, 2H), 4.38 (t, *J* = 6.7 Hz, 2H), 4.34 – 4.24 (m, 2H), 3.85 – 3.76 (m, 1H), 3.52 (d, *J* = 6.1 Hz, 2H), 3.04 – 2.89 (m, 1H), 2.62 (td, *J* = 6.7, 2.1 Hz, 2H), 2.49 – 2.32 (m, 2H), 1.33 (t, *J* = 7.1 Hz, 3H). <sup>13</sup>C NMR (126 MHz, CDCl<sub>3</sub>) δ 166.39, 163.82 (t, *J* = 32.6 Hz),

137.68, 133.11, 129.83, 129.62, 128.38, 128.32, 127.75, 127.68, 115.46 (dd,  $J = 251.9, 250.0$  Hz), 80.51, 78.53, 73.29, 71.88, 71.29, 62.84, 62.68, 36.39 (t,  $J = 23.2$  Hz), 29.74 – 28.58 (m), 19.47, 13.86.  $^{19}\text{F}$  NMR (471 MHz,  $\text{CDCl}_3$ )  $\delta$  -102.65 – -103.73 (m, 1F), -106.25 (dt,  $J = 35.7, 18.1$  Hz, 1F). HRMS-ESI ( $m/z$ )  $[\text{M}+\text{Na}]^+$  calculated for  $\text{C}_{26}\text{H}_{28}\text{F}_2\text{NaO}_6$ , 497.1746, found 497.1746.

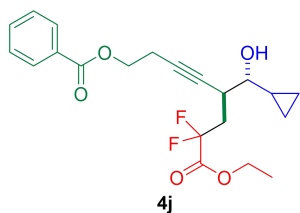

**4j**,  $R_f = 0.5$  (EA:PE=1:3), column solvent: hexane/EtOAc = 10/1, 51%, colorless oil,  $^1\text{H}$  NMR (500 MHz,  $\text{CDCl}_3$ )  $\delta$  8.04 (d,  $J = 7.7$  Hz, 2H), 7.56 (t,  $J = 7.4$  Hz, 1H), 7.44 (t,  $J = 7.6$  Hz, 2H), 4.43 (t,  $J = 6.7$  Hz, 2H), 4.31 (q,  $J = 7.1$  Hz, 2H), 2.95 – 2.86 (m, 1H), 2.74 (dd,  $J = 8.8, 3.3$  Hz, 1H), 2.69 – 2.62 (m, 2H), 2.49 – 2.32 (m, 2H), 2.01 (s, 1H), 1.34 (t,  $J = 7.1$  Hz, 3H), 1.13 – 0.98 (m, 1H), 0.55 – 0.42 (m, 2H), 0.40 – 0.16 (m, 2H).  $^{13}\text{C}$  NMR (126 MHz,  $\text{CDCl}_3$ )  $\delta$  166.44, 163.89 (t,  $J = 32.6$  Hz), 133.11, 129.83, 129.61, 128.35, 115.56 (dd,  $J = 251.9, 249.9$  Hz), 80.28, 79.51, 78.01, 62.84, 62.73, 36.93 (t,  $J = 23.0$  Hz), 32.89 – 32.68 (m), 19.56, 15.80, 13.89, 3.07, 2.89.  $^{19}\text{F}$  NMR (471 MHz,  $\text{CDCl}_3$ )  $\delta$  -102.44 – -103.33 (m, 1F), -106.34 (dt,  $J = 36.4, 17.9$  Hz, 1F). HRMS-ESI ( $m/z$ )  $[\text{M}+\text{Na}]^+$  calculated for  $\text{C}_{21}\text{H}_{24}\text{F}_2\text{NaO}_5$ , 417.1484, found 417.1470.

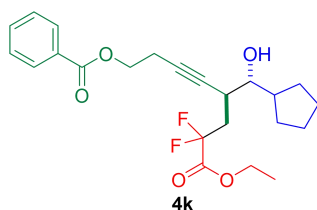

**4k**,  $R_f = 0.5$  (EA:PE=1:3), column solvent: hexane/EtOAc = 10/1, 65%, colorless oil,  $^1\text{H}$  NMR (500 MHz,  $\text{CDCl}_3$ )  $\delta$  8.05 (d,  $J = 7.3$  Hz, 2H), 7.57 (t,  $J = 7.4$  Hz, 1H), 7.44 (t,  $J = 7.6$  Hz, 2H), 4.47 – 4.38 (m, 2H), 4.31 (q,  $J = 7.0, 2.1$  Hz, 2H), 3.20 – 3.08 (m, 1H), 2.88 – 2.79 (m, 1H), 2.69 – 2.61 (m, 2H), 2.55 – 2.25 (m, 2H), 2.06 – 1.94 (m, 1H), 1.80 – 1.70 (m, 2H), 1.69 – 1.62 (m, 1H), 1.62 – 1.51 (m, 2H), 1.49 – 1.40 (m, 2H), 1.34 (t,  $J = 7.1$  Hz, 3H), 1.11 – 0.98 (m, 1H).  $^{13}\text{C}$  NMR (126 MHz,  $\text{CDCl}_3$ )  $\delta$  166.47, 163.93 (t,  $J = 32.6$  Hz), 133.14, 129.82, 129.60, 128.39, 115.63 (dd,  $J = 251.7, 249.5$  Hz), 80.54, 78.85, 78.17, 62.83, 62.75, 45.00, 37.67 (t,  $J = 22.8$  Hz), 31.82 – 30.41 (m), 29.79, 29.09, 25.41, 25.28, 19.60, 13.90.  $^{19}\text{F}$  NMR (471 MHz,  $\text{CDCl}_3$ )  $\delta$  -102.54 – -103.66 (m, 1F), -106.21 (dt,  $J = 36.2, 17.8$  Hz, 1F). HRMS-ESI ( $m/z$ )  $[\text{M}+\text{H}]^+$  calculated for  $\text{C}_{23}\text{H}_{29}\text{F}_2\text{O}_5$ , 423.1978, found 423.1977.

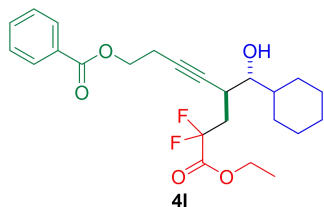

**4l**,  $R_f = 0.5$  (EA:PE=1:3), column solvent: hexane/EtOAc = 10/1, 70%, colorless oil,  $^1\text{H}$  NMR (500 MHz,  $\text{CDCl}_3$ )  $\delta$  8.05 (d,  $J = 8.1$  Hz, 2H), 7.56 (t,  $J = 7.4$  Hz, 1H), 7.44 (t,  $J = 7.7$  Hz, 2H), 4.42 (t,  $J = 6.6$  Hz, 2H), 4.34 – 4.26 (m, 2H), 3.12 – 3.04 (m, 1H), 2.96 – 2.88 (m, 1H), 2.68 – 2.60 (m, 2H), 2.55 – 2.25 (m, 2H), 2.02 – 1.93 (m, 1H), 1.74 – 1.56 (m, 5H), 1.45 – 1.38 (m, 1H), 1.33 (t,  $J = 7.1$  Hz, 3H),

1.17 – 1.00 (m, 3H), 0.98 – 0.83 (m, 2H). <sup>13</sup>C NMR (126 MHz, CDCl<sub>3</sub>) δ 166.47, 163.92 (t, *J* = 32.7 Hz), 133.14, 129.80, 129.61, 128.39, 115.66 (dd, *J* = 251.7, 249.9 Hz), 80.59, 78.76, 77.81, 62.82, 62.79, 42.05, 37.73 (t, *J* = 22.8 Hz), 29.68 – 29.33 (m), 29.21, 28.99, 26.14, 25.79, 25.58, 19.58, 13.89. <sup>19</sup>F NMR (471 MHz, CDCl<sub>3</sub>) δ -102.48 – -103.48 (m, 1F), -106.36 (dt, *J* = 260.2, 18.1 Hz, 1F). HRMS-ESI (m/z) [M+Na]<sup>+</sup> calculated for C<sub>24</sub>H<sub>30</sub>F<sub>2</sub>NaO<sub>5</sub>, 459.1954, found 459.1951.

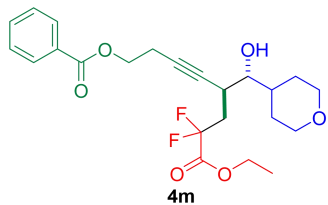

**4m**, *R<sub>f</sub>* = 0.4 (EA:PE=1:2), column solvent: hexane/EtOAc = 5/1, 62%, colorless oil, <sup>1</sup>H NMR (500 MHz, CDCl<sub>3</sub>) δ 8.04 (d, *J* = 7.1 Hz, 2H), 7.57 (t, *J* = 7.4 Hz, 1H), 7.44 (t, *J* = 7.7 Hz, 2H), 4.50 – 4.38 (m, 2H), 4.34 – 4.25 (m, 2H), 3.93 – 3.83 (m, 2H), 3.21 (td, *J* = 11.9, 2.1 Hz, 1H), 3.13 – 3.05 (m, 2H), 2.92 – 2.82 (m, 1H), 2.69 – 2.60 (m, 2H), 2.56 – 2.24 (m, 2H), 1.94 – 1.75 (m, 2H), 1.70 – 1.57 (m, 1H), 1.52 – 1.43 (m, 1H), 1.33 (t, *J* = 7.2 Hz, 3H), 1.30 – 1.15 (m, 2H). <sup>13</sup>C NMR (126 MHz, CDCl<sub>3</sub>) δ 166.52, 163.82 (t, *J* = 32.6 Hz), 133.25, 129.71, 129.58, 128.43, 115.51 (dd, *J* = 251.8, 250.1 Hz), 81.00, 78.26, 77.32, 67.59, 67.15, 62.87, 62.66, 39.47, 37.54 (t, *J* = 22.7 Hz), 29.50, 29.16 – 28.99 (m), 28.81, 19.64, 13.87. <sup>19</sup>F NMR (471 MHz, CDCl<sub>3</sub>) δ -102.71 – -103.63 (m, 1F), -106.39 (dt, *J* = 261.3, 18.3 Hz, 1F). HRMS-ESI (m/z) [M+Na]<sup>+</sup> calculated for C<sub>23</sub>H<sub>28</sub>F<sub>2</sub>NaO<sub>6</sub>, 461.1746, found 461.1740.

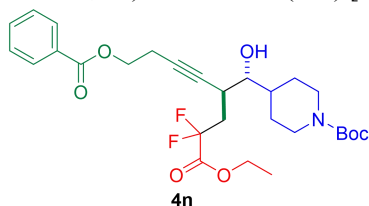

**4n**, *R<sub>f</sub>* = 0.4 (EA:PE=1:3), column solvent: hexane/EtOAc = 5/1, 57%, colorless oil, <sup>1</sup>H NMR (500 MHz, CDCl<sub>3</sub>) δ 8.03 (d, *J* = 7.0 Hz, 2H), 7.57 (t, *J* = 8.1 Hz, 1H), 7.44 (t, *J* = 7.7 Hz, 2H), 4.48 – 4.37 (m, 2H), 4.33 – 4.20 (m, 2H), 4.16 – 3.90 (m, 2H), 3.16 – 3.00 (m, 1H), 2.92 – 2.81 (m, 1H), 2.68 – 2.60 (m, 2H), 2.57 – 2.26 (m, 4H), 1.96 – 1.81 (m, 2H), 1.60 – 1.48 (m, 2H), 1.43 (s, 9H), 1.34 – 1.30 (m, 3H), 1.18 – 0.97 (m, 2H). <sup>13</sup>C NMR (126 MHz, CDCl<sub>3</sub>) δ 166.51, 163.80 (t, *J* = 32.5 Hz), 154.65, 133.26, 129.71, 129.57, 128.43, 115.49 (dd, *J* = 251.9, 250.0 Hz), 81.05, 79.30, 78.29, 62.87, 62.65, 43.28, 40.56, 37.54 (t, *J* = 22.8 Hz), 29.82 – 29.14 (m), 28.58, 28.38, 28.01, 19.64, 13.88. <sup>19</sup>F NMR (471 MHz, CDCl<sub>3</sub>) δ -102.21 – -103.83 (m, 1F), -105.69 – -107.10 (m, 1F). HRMS-ESI (m/z) [M+Na]<sup>+</sup> calculated for C<sub>28</sub>H<sub>37</sub>F<sub>2</sub>NNaO<sub>7</sub>, 560.2430, found 560.2427.

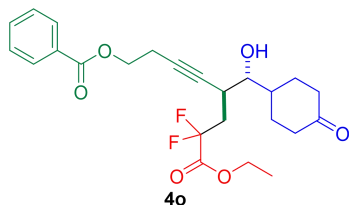

**4o**, *R<sub>f</sub>* = 0.2 (EA:PE=1:3), column solvent: hexane/EtOAc = 3/1, 63%, colorless oil, <sup>1</sup>H NMR (500 MHz, CDCl<sub>3</sub>) δ 8.05 (d, *J* = 7.3 Hz, 2H), 7.58 (t, *J* = 7.4 Hz, 1H), 7.45 (t, *J* = 7.7 Hz, 2H), 4.54 – 4.40 (m, 2H), 4.31 (q, *J* = 7.1 Hz, 2H), 3.25 – 3.15 (m, 1H), 2.98 – 2.87 (m, 1H), 2.71 – 2.63 (m, 2H), 2.56 – 2.42 (m, 1H), 2.40 – 2.25 (m, 4H), 2.24 – 2.14 (m, 1H), 2.08 – 1.92 (m, 3H), 1.89 – 1.80 (m, 1H), 1.50 – 1.36 (m, 2H), 1.34 (t, *J* = 7.1 Hz, 3H). <sup>13</sup>C NMR (126 MHz, CDCl<sub>3</sub>) δ 211.46, 166.60, 163.79 (t, *J* = 32.5 Hz), 133.38, 129.71, 129.58, 128.50, 115.45 (dd, *J* = 251.9, 250.2 Hz), 81.41, 78.22, 76.34, 62.95,

62.64, 40.35, 39.97, 39.95, 37.56 (t,  $J = 22.7$  Hz), 30.08 – 29.88 (m), 28.94, 28.72, 19.74, 13.90.  $^{19}\text{F}$  NMR (471 MHz,  $\text{CDCl}_3$ )  $\delta$  -102.76 – -103.79 (m, 1F), -105.91 – -106.87 (m, 1F). HRMS-ESI ( $m/z$ )  $[\text{M}+\text{Na}]^+$  calculated for  $\text{C}_{24}\text{H}_{28}\text{F}_2\text{NaO}_6$ , 473.1746, found 473.1732.

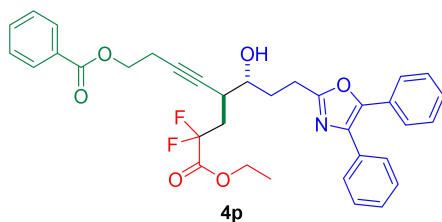

**4p**,  $R_f = 0.3$  (EA:PE=1:2), column solvent: hexane/EtOAc = 3/1, 67%, colorless oil,  $^1\text{H}$  NMR (500 MHz,  $\text{CDCl}_3$ )  $\delta$  8.04 (d,  $J = 7.2$  Hz, 2H), 7.61 (d,  $J = 6.9$  Hz, 2H), 7.57 (d,  $J = 6.9$  Hz, 2H), 7.52 (t,  $J = 7.4$  Hz, 1H), 7.41 (t,  $J = 7.7$  Hz, 2H), 7.38 – 7.29 (m, 6H), 4.42 (t,  $J = 6.7$  Hz, 2H), 4.33 – 4.26 (m, 2H), 3.79 – 3.72 (m, 1H), 2.97 (t,  $J = 7.0$  Hz, 2H), 2.89 – 2.77 (m, 1H), 2.70 – 2.59 (m, 2H), 2.51 – 2.38 (m, 2H), 2.15 – 2.05 (m, 2H), 1.33 (t,  $J = 7.2$  Hz, 3H).  $^{13}\text{C}$  NMR (126 MHz,  $\text{CDCl}_3$ )  $\delta$  166.41, 163.89 (t,  $J = 32.6$  Hz), 163.25, 145.29, 134.67, 133.08, 132.09, 129.81, 129.59, 128.79, 128.62, 128.53, 128.49, 128.34, 128.09, 127.81, 126.43, 115.58 (dd,  $J = 251.5, 250.3$  Hz), 80.56, 79.12, 72.71, 62.84, 62.72, 36.53 (t,  $J = 22.9$  Hz), 33.08 – 32.45 (m), 31.68, 25.26, 19.55, 13.88.  $^{19}\text{F}$  NMR (471 MHz,  $\text{CDCl}_3$ )  $\delta$  -102.73 – -103.70 (m, 1F), -106.06 (dt,  $J = 36.2, 17.8$  Hz, 1F). HRMS-ESI ( $m/z$ )  $[\text{M}+\text{Na}]^+$  calculated for  $\text{C}_{35}\text{H}_{33}\text{F}_2\text{NNaO}_6$ , 624.2168, found 624.2152.

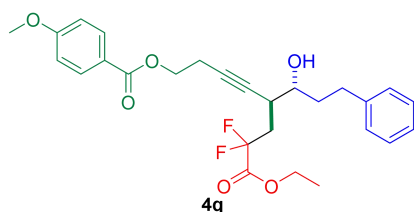

**4q**,  $R_f = 0.4$  (EA:PE=1:3), column solvent: hexane/EtOAc = 5/1, 71%, colorless oil,  $^1\text{H}$  NMR (500 MHz,  $\text{CDCl}_3$ )  $\delta$  7.97 (d,  $J = 8.8$  Hz, 2H), 7.24 (t,  $J = 7.4$  Hz, 2H), 7.15 (t,  $J = 7.3$  Hz, 1H), 7.12 (d,  $J = 7.3$  Hz, 2H), 6.87 (d,  $J = 8.9$  Hz, 2H), 4.40 – 4.35 (m, 2H), 4.30 – 4.23 (m, 2H), 3.82 (s, 3H), 3.54 – 3.38 (m, 1H), 2.76 – 2.69 (m, 2H), 2.66 – 2.57 (m, 3H), 2.47 – 2.25 (m, 2H), 1.95 – 1.74 (m, 3H), 1.31 (t,  $J = 7.2$  Hz, 3H).  $^{13}\text{C}$  NMR (126 MHz,  $\text{CDCl}_3$ )  $\delta$  166.25, 163.84 (t,  $J = 32.6$  Hz), 163.49, 141.45, 131.67, 128.36, 128.33, 125.86, 122.12, 115.51 (dd,  $J = 253.3, 248.3$  Hz), 113.63, 81.03, 78.71, 72.44, 62.84, 62.39, 55.37, 37.06, 37.38 – 36.75 (m), 37.38 – 36.75 (m), 31.95, 19.65, 13.86.  $^{19}\text{F}$  NMR (471 MHz,  $\text{CDCl}_3$ )  $\delta$  -102.38 – -103.60 (m, 1F), -106.29 (dt,  $J = 260.5, 17.9$  Hz, 1F). HRMS-ESI ( $m/z$ )  $[\text{M}+\text{Na}]^+$  calculated for  $\text{C}_{27}\text{H}_{30}\text{F}_2\text{NaO}_6$ , 511.1903, found 511.1890.

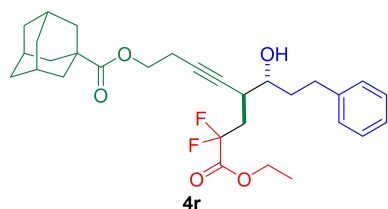

**4r**,  $R_f = 0.5$  (EA:PE=1:3), column solvent: hexane/EtOAc = 10/1, 75%, colorless oil,  $^1\text{H}$  NMR (500 MHz,  $\text{CDCl}_3$ )  $\delta$  7.28 (t,  $J = 7.5$  Hz, 2H), 7.22 – 7.16 (m, 3H), 4.30 (q,  $J = 7.1$  Hz, 2H), 4.22 – 4.15 (m, 1H), 4.13 – 4.06 (m, 1H), 3.56 – 3.47 (m, 1H), 2.84 – 2.65 (m, 3H), 2.51 – 2.46 (m, 2H), 2.46 – 2.27 (m, 2H), 2.02 – 1.98 (m, 3H), 1.96 – 1.90 (m, 2H), 1.89 – 1.86 (m, 6H), 1.74 – 1.64 (m, 6H), 1.34 (t,  $J$



= 7.2 Hz, 3H).  $^{13}\text{C}$  NMR (126 MHz,  $\text{CDCl}_3$ )  $\delta$  177.60, 163.82 (t,  $J = 32.6$  Hz), 141.44, 128.38, 128.35, 125.89, 115.49 (dd,  $J = 251.8, 250.0$  Hz), 81.10, 78.39, 72.36, 62.83, 61.90, 40.63, 38.69, 37.10, 37.05 (t,  $J = 22.9$  Hz), 36.36, 32.60 – 32.37 (m), 31.98, 27.80, 19.40, 13.86.  $^{19}\text{F}$  NMR (471 MHz,  $\text{CDCl}_3$ )  $\delta$  -102.76 – -103.55 (m, 1F), -106.19 (dt,  $J = 261.1, 18.2$  Hz, 1F). HRMS-ESI (m/z)  $[\text{M}+\text{Na}]^+$  calculated for  $\text{C}_{30}\text{H}_{38}\text{F}_2\text{NaO}_5$ , 539.2580, found 539.2564.

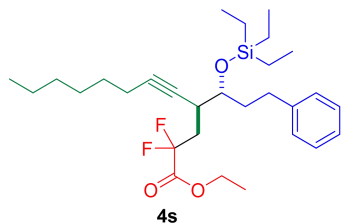

**4s**,  $R_f = 0.6$  (EA:PE=1:10), column solvent: hexane/EtOAc = 20/1, 82%, colorless oil,  $^1\text{H}$  NMR (500 MHz,  $\text{CDCl}_3$ )  $\delta$  7.32 – 7.27 (m, 2H), 7.22 – 7.16 (m, 3H), 4.30 (q,  $J = 7.2$  Hz, 2H), 3.91 – 3.75 (m, 1H), 2.83 – 2.74 (m, 2H), 2.61 – 2.51 (m, 1H), 2.49 – 2.37 (m, 1H), 2.27 – 2.05 (m, 4H), 1.66 – 1.57 (m, 1H), 1.50 – 1.41 (m, 2H), 1.36 (t,  $J = 7.2$  Hz, 5H), 1.31 – 1.24 (m, 4H), 0.98 (t,  $J = 8.0$  Hz, 9H), 0.88 (t,  $J = 6.9$  Hz, 3H), 0.63 (q,  $J = 7.9$  Hz, 6H).  $^{13}\text{C}$  NMR (126 MHz,  $\text{CDCl}_3$ )  $\delta$  164.08 (t,  $J = 32.7$  Hz), 142.14, 128.35, 128.28, 125.80, 116.07 (dd,  $J = 252.3, 248.0$  Hz), 84.13, 78.16, 73.67, 62.64, 34.82, 34.15 (t,  $J = 23.2$  Hz), 32.81, 32.27 – 31.91 (m), 31.32, 28.75, 28.50, 22.53, 18.76, 14.04, 13.87, 6.86, 5.00.  $^{19}\text{F}$  NMR (471 MHz,  $\text{CDCl}_3$ )  $\delta$  -101.44 (dt,  $J = 257.6, 13.3$  Hz, 1F), -107.38 – -108.34 (m, 1F). HRMS-ESI (m/z)  $[\text{M}+\text{Na}]^+$  calculated for  $\text{C}_{29}\text{H}_{46}\text{F}_2\text{NaO}_3\text{Si}$ , 531.3076, found 531.3064.

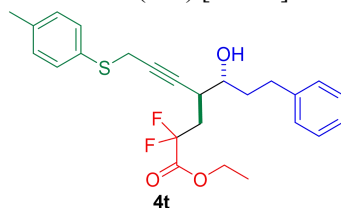

**4t**,  $R_f = 0.5$  (EA:PE=1:3), column solvent: hexane/EtOAc = 10/1, 67%, colorless oil,  $^1\text{H}$  NMR (500 MHz,  $\text{CDCl}_3$ )  $\delta$  7.33 (d,  $J = 8.1$  Hz, 2H), 7.29 (t,  $J = 7.5$  Hz, 2H), 7.20 (t,  $J = 7.4$  Hz, 1H), 7.16 (d,  $J = 7.1$  Hz, 2H), 7.11 (d,  $J = 8.0$  Hz, 2H), 4.31 (q,  $J = 7.1$  Hz, 2H), 3.58 (d,  $J = 2.1$  Hz, 2H), 3.50 – 3.38 (m, 1H), 2.78 – 2.65 (m, 2H), 2.64 – 2.55 (m, 1H), 2.46 – 2.27 (m, 5H), 1.77 – 1.67 (m, 2H), 1.35 (t,  $J = 7.2$  Hz, 3H).  $^{13}\text{C}$  NMR (126 MHz,  $\text{CDCl}_3$ )  $\delta$  163.80 (t,  $J = 32.5$  Hz), 141.37, 137.39, 131.09, 130.93, 129.78, 128.40, 128.35, 125.93, 115.42 (dd,  $J = 251.8, 250.1$  Hz), 80.84, 80.31, 72.31, 62.94, 37.08, 36.90 (t,  $J = 23.1$  Hz), 32.76 – 32.37 (m), 31.90, 23.36, 21.02, 13.89.  $^{19}\text{F}$  NMR (471 MHz,  $\text{CDCl}_3$ )  $\delta$  -102.71 – -103.51 (m, 1F), -106.36 (dt,  $J = 36.3, 17.8$  Hz, 1F). HRMS-ESI (m/z)  $[\text{M}+\text{Na}]^+$  calculated for  $\text{C}_{25}\text{H}_{28}\text{F}_2\text{NaO}_3\text{S}$ , 469.1619, found 469.1606.

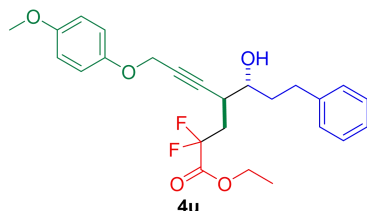

**4u**,  $R_f = 0.3$  (EA:PE=1:3), column solvent: hexane/EtOAc = 5/1, 57%, colorless oil,  $^1\text{H}$  NMR (500 MHz,  $\text{CDCl}_3$ )  $\delta$  7.28 (t,  $J = 7.5$  Hz, 2H), 7.20 (t,  $J = 7.2$  Hz, 1H), 7.15 (d,  $J = 7.6$  Hz, 2H), 6.89 (d,  $J = 8.9$  Hz, 2H), 6.82 (d,  $J = 8.9$  Hz, 2H), 4.64 (s, 2H), 4.30 (q,  $J = 7.1$  Hz, 2H), 3.75 (s, 3H), 3.58 – 3.50 (m, 1H), 2.87 – 2.78 (m, 1H), 2.77 – 2.59 (m, 2H), 2.53 – 2.29 (m, 2H), 1.84 – 1.74 (m, 3H), 1.34 (t,  $J$

= 7.1 Hz, 3H).  $^{13}\text{C}$  NMR (126 MHz,  $\text{CDCl}_3$ )  $\delta$  163.79 (t,  $J = 32.4$  Hz), 154.47, 151.47, 141.30, 128.44, 128.36, 125.98, 116.33, 115.40 (dd,  $J = 251.7, 250.4$  Hz), 114.60, 84.60, 80.03, 72.33, 62.99, 56.90, 55.65, 36.95, 36.61 (t,  $J = 23.1$  Hz), 32.73 – 32.40 (m), 31.96, 13.88.  $^{19}\text{F}$  NMR (471 MHz,  $\text{CDCl}_3$ )  $\delta$  -103.22 (ddd,  $J = 261.4, 17.6, 13.2$  Hz, 1F), -106.26 (dt,  $J = 261.5, 18.1$  Hz, 1F). HRMS-ESI ( $m/z$ )  $[\text{M}+\text{Na}]^+$  calculated for  $\text{C}_{25}\text{H}_{28}\text{F}_2\text{NaO}_5$ , 469.1797, found 469.1793.

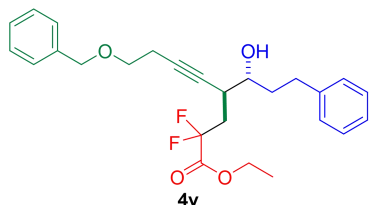

**4v**,  $R_f = 0.5$  (EA:PE=1:3), column solvent: hexane/EtOAc = 8/1, 82%, colorless oil,  $^1\text{H}$  NMR (500 MHz,  $\text{CDCl}_3$ )  $\delta$  7.37 – 7.31 (m, 4H), 7.31 – 7.26 (m, 3H), 7.22 – 7.16 (m, 3H), 4.53 (s, 2H), 4.28 (q,  $J = 7.0$  Hz, 2H), 3.56 (t,  $J = 6.8$  Hz, 2H), 3.54 – 3.46 (m, 1H), 2.85 – 2.63 (m, 3H), 2.52 – 2.24 (m, 4H), 1.97 – 1.79 (m, 2H), 1.33 (t,  $J = 7.1$  Hz, 3H).  $^{13}\text{C}$  NMR (126 MHz,  $\text{CDCl}_3$ )  $\delta$  163.93 (t,  $J = 32.5$  Hz), 141.56, 137.89, 128.42, 128.41, 127.74, 127.70, 125.92, 115.62 (dd,  $J = 251.8, 249.7$  Hz), 82.24, 78.10, 77.25, 77.00, 76.75, 72.99, 72.44, 68.39, 62.85, 37.17, 37.18 (t,  $J = 23.0$  Hz), 32.83 – 32.50 (m), 32.01, 20.13, 13.88.  $^{19}\text{F}$  NMR (471 MHz,  $\text{CDCl}_3$ )  $\delta$  -102.76 (ddd,  $J = 261.1, 16.9, 13.6$  Hz, 1F), -106.38 (dt,  $J = 36.3, 18.6$  Hz, 1F). HRMS-ESI ( $m/z$ )  $[\text{M}+\text{Na}]^+$  calculated for  $\text{C}_{26}\text{H}_{31}\text{F}_2\text{O}_4$ , 445.2185, found 445.2185.

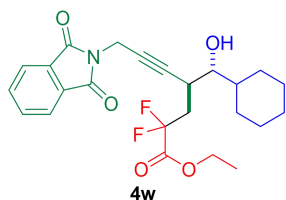

**4w**,  $R_f = 0.4$  (EA:PE=1:3), column solvent: hexane/EtOAc = 5/1, 59%, colorless oil,  $^1\text{H}$  NMR (500 MHz,  $\text{CDCl}_3$ )  $\delta$  7.90 – 7.85 (m, 2H), 7.77 – 7.72 (m, 2H), 4.43 (d,  $J = 1.8$  Hz, 2H), 4.31 (q,  $J = 7.1$  Hz, 2H), 3.22 – 3.10 (m, 1H), 2.96 – 2.87 (m, 1H), 2.56 – 2.25 (m, 2H), 2.01 (d,  $J = 12.6$  Hz, 1H), 1.76 – 1.61 (m, 5H), 1.48 – 1.39 (m, 1H), 1.34 (t,  $J = 7.1$  Hz, 3H), 1.17 – 1.07 (m, 3H), 1.00 – 0.87 (m, 2H).  $^{13}\text{C}$  NMR (126 MHz,  $\text{CDCl}_3$ )  $\delta$  167.11, 163.84 (t,  $J = 32.3$  Hz), 134.24, 131.93, 123.54, 115.51 (dd,  $J = 252.4, 250.1$  Hz), 81.33, 77.77, 62.96, 42.11, 37.22 (t,  $J = 22.9$  Hz), 29.68 – 29.48 (m), 29.10, 29.08, 27.60, 26.19, 25.83, 25.73, 13.92.  $^{19}\text{F}$  NMR (471 MHz,  $\text{CDCl}_3$ )  $\delta$  -102.63 – -103.56 (m, 1F), -106.36 (dt,  $J = 260.9, 18.5$  Hz, 1F). HRMS-ESI ( $m/z$ )  $[\text{M}-\text{OH}]^+$  calculated for  $\text{C}_{24}\text{H}_{26}\text{F}_2\text{NO}_4^+$ , 430.1824, found 430.1827.

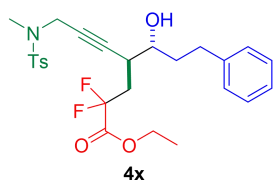

**4x**,  $R_f = 0.3$  (EA:PE=1:3), column solvent: hexane/EtOAc = 5/1, 82%, colorless oil,  $^1\text{H}$  NMR (500 MHz,  $\text{CDCl}_3$ )  $\delta$  7.68 (d,  $J = 8.3$  Hz, 2H), 7.30 (t,  $J = 7.5$  Hz, 2H), 7.26 (d,  $J = 8.0$  Hz, 2H), 7.21 (t,  $J = 7.4$  Hz, 1H), 7.17 (d,  $J = 7.0$  Hz, 2H), 4.31 (q,  $J = 7.1$  Hz, 2H), 4.06 – 3.95 (m, 2H), 3.46 – 3.41 (m, 1H), 2.79 (s, 3H), 2.76 – 2.69 (m, 1H), 2.64 – 2.57 (m, 2H), 2.40 (s, 3H), 2.28 – 2.16 (m, 2H), 1.78 – 1.59 (m, 3H), 1.35 (t,  $J = 7.1$  Hz, 3H).  $^{13}\text{C}$  NMR (126 MHz,  $\text{CDCl}_3$ )  $\delta$  163.73 (t,  $J = 32.4$  Hz), 143.79, 141.26, 134.17, 129.60, 128.50, 128.34, 127.86, 126.07, 115.28 (dd,  $J = 254.0, 248.9$  Hz), 83.24, 72.08,

63.05, 39.95, 36.98, 36.37 (t,  $J = 22.9$  Hz), 34.43, 32.47 – 32.11 (m), 31.95, 21.46, 13.91.  $^{19}\text{F}$  NMR (471 MHz,  $\text{CDCl}_3$ )  $\delta$  -103.83 – -104.81 (m, 1F), -104.97 – -106.01 (m, 1F). HRMS-ESI ( $m/z$ )  $[\text{M}+\text{Na}]^+$  calculated for  $\text{C}_{26}\text{H}_{31}\text{F}_2\text{NNaO}_5\text{S}$ , 530.1783, found 530.1769.

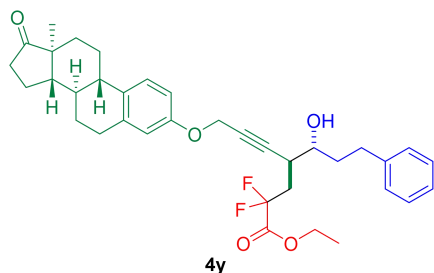

**4y**,  $R_f = 0.2$  (EA:PE=1:3), column solvent: hexane/EtOAc = 3/1, 80%, colorless oil,  $^1\text{H}$  NMR (500 MHz,  $\text{CDCl}_3$ )  $\delta$  7.35 – 7.30 (m, 2H), 7.27 – 7.22 (m, 2H), 7.20 (d,  $J = 7.4$  Hz, 2H), 6.81 (dd,  $J = 8.5, 2.5$  Hz, 1H), 6.75 (d,  $J = 2.4$  Hz, 1H), 4.71 (d,  $J = 1.6$  Hz, 2H), 4.36 (q,  $J = 7.1$  Hz, 2H), 3.67 – 3.54 (m, 1H), 2.96 – 2.85 (m, 3H), 2.83 – 2.75 (m, 1H), 2.72 – 2.64 (m, 1H), 2.60 – 2.49 (m, 2H), 2.46 – 2.35 (m, 2H), 2.33 – 2.24 (m, 1H), 2.25 – 2.14 (m, 1H), 2.14 – 2.07 (m, 1H), 2.07 – 1.96 (m, 2H), 1.93 – 1.82 (m, 2H), 1.75 (s, 1H), 1.71 – 1.43 (m, 7H), 1.40 (t,  $J = 7.2$  Hz, 3H), 0.95 (s, 3H).  $^{13}\text{C}$  NMR (126 MHz,  $\text{CDCl}_3$ )  $\delta$  163.75 (t,  $J = 32.5$  Hz), 155.40, 141.25, 137.83, 132.94, 128.39, 128.32, 128.31, 126.32, 125.95, 117.47 – 113.27 (m), 115.10, 115.05, 112.62, 112.59, 84.63, 79.93, 72.32, 62.96, 56.06, 50.30, 47.93, 43.88, 38.19, 36.84, 36.55 (t,  $J = 23.1$  Hz), 35.81, 32.61 – 32.41 (m), 31.95, 31.48, 29.54, 26.43, 25.82, 21.51, 13.86, 13.77.  $^{19}\text{F}$  NMR (471 MHz,  $\text{CDCl}_3$ )  $\delta$  -102.66 – -103.71 (m, 1F), -105.63 – -106.86 (m, 1F). HRMS-ESI ( $m/z$ )  $[\text{M}+\text{Na}]^+$  calculated for  $\text{C}_{36}\text{H}_{42}\text{F}_2\text{NaO}_5$ , 615.2893, found 615.2882.

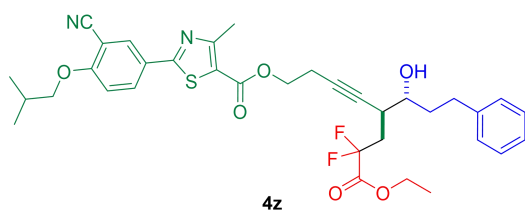

**4z**,  $R_f = 0.3$  (EA:PE=1:3), column solvent: hexane/EtOAc = 3/1, 61%, colorless oil,  $^1\text{H}$  NMR (500 MHz,  $\text{CDCl}_3$ )  $\delta$  8.24 (d,  $J = 2.3$  Hz, 1H), 8.15 (dd,  $J = 8.8, 2.3$  Hz, 1H), 7.35 – 7.30 (m, 2H), 7.26 – 7.20 (m, 3H), 7.08 (d,  $J = 8.9$  Hz, 1H), 4.48 (t,  $J = 6.5$  Hz, 2H), 4.38 (q,  $J = 7.2$  Hz, 2H), 3.98 (d,  $J = 6.5$  Hz, 2H), 3.65 – 3.56 (m, 1H), 2.89 – 2.81 (m, 5H), 2.78 – 2.68 (m, 3H), 2.59 – 2.39 (m, 2H), 2.33 – 2.24 (m, 1H), 2.04 – 1.86 (m, 3H), 1.42 (t,  $J = 7.2$  Hz, 3H), 1.17 (d,  $J = 6.7$  Hz, 6H).  $^{13}\text{C}$  NMR (126 MHz,  $\text{CDCl}_3$ )  $\delta$  167.57, 163.85 (t,  $J = 32.5$  Hz), 162.52, 161.86, 161.78, 141.36, 132.58, 132.09, 128.41, 128.30, 125.93, 125.83, 121.11, 115.50 (dd,  $J = 253.9, 248.0$  Hz), 115.33, 112.56, 102.93, 80.60, 79.02, 75.65, 72.40, 62.99, 62.91, 37.14, 37.00 (t,  $J = 22.8$  Hz), 32.72 – 32.25 (m), 31.99, 28.11, 19.59, 19.02, 17.52, 13.91.  $^{19}\text{F}$  NMR (471 MHz,  $\text{CDCl}_3$ )  $\delta$  -103.05 – -104.04 (m, 1F), -105.97 (dt,  $J = 35.9, 17.5$  Hz, 1F). HRMS-ESI ( $m/z$ )  $[\text{M}+\text{Na}]^+$  calculated for  $\text{C}_{35}\text{H}_{38}\text{F}_2\text{N}_2\text{NaO}_6\text{S}$ , 675.2311, found 675.2314.

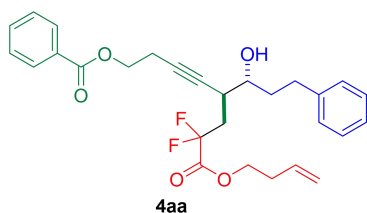

**4aa**,  $R_f = 0.5$  (EA:PE=1:3), column solvent: hexane/EtOAc = 10/1, 56%, colorless oil,  $^1\text{H NMR}$  (500 MHz,  $\text{CDCl}_3$ )  $\delta$  8.05 (d,  $J = 7.7$  Hz, 2H), 7.56 (t,  $J = 7.4$  Hz, 1H), 7.43 (t,  $J = 7.8$  Hz, 2H), 7.27 (t,  $J = 7.5$  Hz, 2H), 7.18 (t,  $J = 7.3$  Hz, 1H), 7.15 (d,  $J = 7.2$  Hz, 2H), 5.83 – 5.70 (m, 1H), 5.17 – 5.06 (m, 2H), 4.44 (t,  $J = 6.6$  Hz, 2H), 4.34 – 4.24 (m, 2H), 3.58 – 3.45 (m, 1H), 2.79 – 2.70 (m, 2H), 2.68 – 2.59 (m, 3H), 2.50 – 2.25 (m, 4H), 1.95 – 1.75 (m, 3H).  $^{13}\text{C NMR}$  (126 MHz,  $\text{CDCl}_3$ )  $\delta$  166.48, 163.79 (t,  $J = 32.8$  Hz), 141.42, 133.15, 132.86, 129.76, 129.62, 128.40, 128.35, 125.89, 118.00, 115.49 (dd,  $J = 254.7, 247.1$  Hz), 80.94, 78.79, 72.38, 65.61, 62.70, 37.10, 37.05 (t,  $J = 22.9$  Hz), 32.61, 32.58 – 32.48 (m), 31.94, 19.60.  $^{19}\text{F NMR}$  (471 MHz,  $\text{CDCl}_3$ )  $\delta$  -102.57 – -103.39 (m, 1F), -105.98 (dt,  $J = 260.9, 18.0$  Hz, 1F). HRMS-ESI (m/z)  $[\text{M}+\text{Na}]^+$  calculated for  $\text{C}_{28}\text{H}_{30}\text{F}_2\text{NaO}_5$ , 507.1954, found 507.1953.

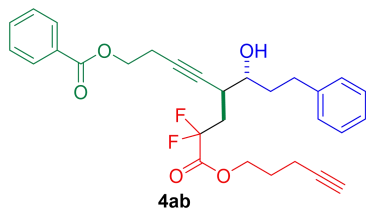

**4ab**,  $R_f = 0.5$  (EA:PE=1:3), column solvent: hexane/EtOAc = 10/1, 61%, colorless oil,  $^1\text{H NMR}$  (500 MHz,  $\text{CDCl}_3$ )  $\delta$  8.05 (d,  $J = 7.3$  Hz, 2H), 7.56 (t,  $J = 7.4$  Hz, 1H), 7.43 (t,  $J = 7.7$  Hz, 2H), 7.26 (t,  $J = 7.5$  Hz, 2H), 7.18 (t,  $J = 7.4$  Hz, 1H), 7.14 (d,  $J = 7.3$  Hz, 2H), 4.44 (t,  $J = 6.6$  Hz, 2H), 4.35 (t,  $J = 6.3$  Hz, 2H), 3.56 – 3.44 (m, 1H), 2.79 – 2.70 (m, 2H), 2.69 – 2.58 (m, 3H), 2.51 – 2.26 (m, 4H), 2.01 – 1.97 (m, 1H), 1.95 – 1.76 (m, 5H).  $^{13}\text{C NMR}$  (126 MHz,  $\text{CDCl}_3$ )  $\delta$  166.48, 163.78 (t,  $J = 32.8$  Hz), 141.40, 133.15, 129.75, 129.61, 128.40, 128.35, 125.89, 115.52 (dd,  $J = 252.0, 249.9$  Hz), 82.37, 81.00, 78.73, 72.37, 69.49, 65.15, 62.69, 37.05, 37.02 (t,  $J = 22.9$  Hz), 32.62 – 32.40 (m), 31.94, 27.02, 19.59, 14.93.  $^{19}\text{F NMR}$  (471 MHz,  $\text{CDCl}_3$ )  $\delta$  -102.73 (ddd,  $J = 30.4, 16.4, 13.6$  Hz, 1F), -105.97 (dt,  $J = 261.6, 18.2$  Hz, 1F). HRMS-ESI (m/z)  $[\text{M}+\text{Na}]^+$  calculated for  $\text{C}_{29}\text{H}_{30}\text{F}_2\text{NaO}_5$ , 519.1954, found 519.1955.

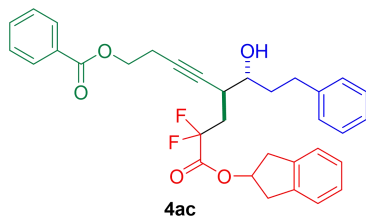

**4ac**,  $R_f = 0.5$  (EA:PE=1:3), column solvent: hexane/EtOAc = 10/1, 66%, colorless oil,  $^1\text{H NMR}$  (500 MHz,  $\text{CDCl}_3$ )  $\delta$  8.04 (d,  $J = 8.1$  Hz, 2H), 7.53 (t,  $J = 7.4$  Hz, 1H), 7.40 (t,  $J = 7.4$  Hz, 2H), 7.28 – 7.14 (m, 7H), 7.12 (d,  $J = 7.6$  Hz, 2H), 5.70 – 5.51 (m, 1H), 4.41 (t,  $J = 6.3$  Hz, 2H), 3.52 – 3.42 (m, 1H), 3.35 (dd,  $J = 17.2, 6.5$  Hz, 2H), 3.12 – 3.00 (m, 2H), 2.76 – 2.66 (m, 2H), 2.66 – 2.53 (m, 3H), 2.46 – 2.20 (m, 2H), 1.94 – 1.71 (m, 3H).  $^{13}\text{C NMR}$  (126 MHz,  $\text{CDCl}_3$ )  $\delta$  166.47, 163.76 (t,  $J = 32.7$  Hz), 141.41, 139.53, 133.13, 129.74, 129.60, 128.38, 128.33, 126.98, 125.87, 124.59, 115.36 (dd,  $J = 255.1, 247.3$  Hz), 80.89, 78.84, 78.00, 72.31, 62.69, 39.25, 39.21, 37.01, 36.88 (t,  $J = 22.8$  Hz), 32.61 – 32.39 (m), 31.92, 19.59.  $^{19}\text{F NMR}$  (471 MHz,  $\text{CDCl}_3$ )  $\delta$  -102.65 – -103.63 (m, 1F), -105.44 (ddd,  $J = 35.0, 23.9, 10.7$  Hz, 1F). HRMS-ESI (m/z)  $[\text{M}+\text{Na}]^+$  calculated for  $\text{C}_{33}\text{H}_{32}\text{F}_2\text{NaO}_5$ , 569.2110, found 569.2119.

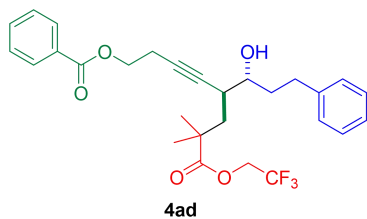

**4ad**,  $R_f = 0.5$  (EA:PE=1:3), column solvent: hexane/EtOAc = 10/1, 53%, colorless oil,  $^1\text{H NMR}$  (500 MHz,  $\text{CDCl}_3$ )  $\delta$  8.12 (d,  $J = 7.6$  Hz, 2H), 7.63 (t,  $J = 7.4$  Hz, 1H), 7.50 (t,  $J = 7.7$  Hz, 2H), 7.37 – 7.30 (m, 3H), 7.23 (d,  $J = 7.3$  Hz, 2H), 4.58 – 4.36 (m, 4H), 3.53 – 3.38 (m, 1H), 2.88 – 2.62 (m, 4H), 2.53 – 2.41 (m, 1H), 2.11 – 1.75 (m, 4H), 1.66 (s, 1H), 1.33 (s, 3H), 1.29 (s, 3H).  $^{13}\text{C NMR}$  (126 MHz,  $\text{CDCl}_3$ )  $\delta$  176.01, 166.44, 141.75, 133.15, 129.81, 129.63, 128.42, 128.40, 128.37, 125.83, 123.01 (d,  $J = 277.4$  Hz), 80.66, 73.39, 62.80, 60.29 (q,  $J = 36.5$  Hz), 42.04, 41.94, 37.01, 35.58, 32.03, 25.80, 25.08, 19.56.  $^{19}\text{F NMR}$  (471 MHz,  $\text{CDCl}_3$ )  $\delta$  -73.71 (t,  $J = 8.3$  Hz, 1F). HRMS-ESI ( $m/z$ )  $[\text{M}+\text{H}]^+$  calculated for  $\text{C}_{28}\text{H}_{32}\text{F}_3\text{O}_5$ , 505.2196, found 505.2196.

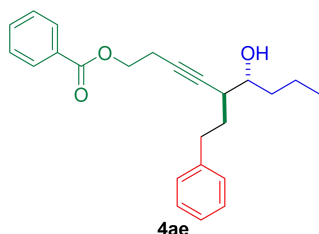

**4ae**,  $R_f = 0.6$  (EA:PE=1:3), column solvent: hexane/EtOAc = 15/1, 62%, colorless oil,  $^1\text{H NMR}$  (500 MHz,  $\text{CDCl}_3$ )  $\delta$  8.09 (d,  $J = 7.6$  Hz, 2H), 7.58 (t,  $J = 7.4$  Hz, 1H), 7.45 (t,  $J = 7.7$  Hz, 2H), 7.28 (d,  $J = 5.7$  Hz, 2H), 7.19 (t,  $J = 7.6$  Hz, 3H), 4.49 (t,  $J = 6.6$  Hz, 2H), 3.59 – 3.42 (m, 1H), 2.94 – 2.62 (m, 4H), 2.54 – 2.34 (m, 1H), 1.99 – 1.74 (m, 2H), 1.64 (s, 1H), 1.56 – 1.26 (m, 4H), 0.89 (t,  $J = 6.9$  Hz, 3H).  $^{13}\text{C NMR}$  (126 MHz,  $\text{CDCl}_3$ )  $\delta$  166.46, 141.80, 133.09, 129.92, 129.63, 128.45, 128.38, 128.30, 125.80, 81.00, 80.41, 73.01, 63.10, 38.64, 37.88, 33.72, 33.70, 19.64, 18.98, 13.96. HRMS-ESI ( $m/z$ )  $[\text{M}+\text{H}]^+$  calculated for  $\text{C}_{24}\text{H}_{29}\text{O}_3$ , 365.2111, found 365.2111.

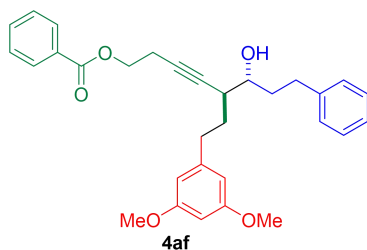

**4af**,  $R_f = 0.4$  (EA:PE=1:3), column solvent: hexane/EtOAc = 5/1, 57%, colorless oil,  $^1\text{H NMR}$  (500 MHz,  $\text{CDCl}_3$ )  $\delta$  8.14 (d,  $J = 7.9$  Hz, 2H), 7.63 (t,  $J = 7.2$  Hz, 1H), 7.49 (t,  $J = 7.6$  Hz, 2H), 7.33 (d,  $J = 9.2$  Hz, 2H), 7.26 – 7.17 (m, 3H), 6.40 (s, 2H), 6.38 (s, 1H), 4.55 (t,  $J = 6.3$  Hz, 2H), 3.84 (s, 6H), 3.70 – 3.42 (m, 1H), 2.93 – 2.61 (m, 6H), 2.59 – 2.43 (m, 1H), 2.02 – 1.73 (m, 5H).  $^{13}\text{C NMR}$  (126 MHz,  $\text{CDCl}_3$ )  $\delta$  166.46, 160.70, 144.10, 141.87, 133.10, 129.86, 129.61, 128.42, 128.39, 128.34, 125.77, 106.49, 97.83, 80.78, 80.67, 72.48, 63.06, 55.21, 38.70, 37.38, 33.95, 33.42, 32.03, 19.65. HRMS-ESI ( $m/z$ )  $[\text{M}+\text{Na}]^+$  calculated for  $\text{C}_{31}\text{H}_{35}\text{O}_5$ , 487.2479, found 487.2479.

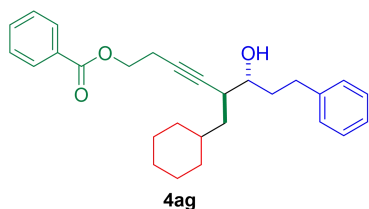

**4ag**,  $R_f = 0.6$  (EA:PE=1:3), column solvent: hexane/EtOAc = 15/1, 46%, colorless oil,  $^1\text{H NMR}$  (500 MHz,  $\text{CDCl}_3$ )  $\delta$  8.04 (d,  $J = 7.9$  Hz, 2H), 7.53 (t,  $J = 7.2$  Hz, 1H), 7.40 (t,  $J = 7.6$  Hz, 2H), 7.24 (d,  $J = 7.4$  Hz, 2H), 7.15 (m, 3H), 4.41 (t,  $J = 6.4$  Hz, 2H), 3.55 – 3.30 (m, 1H), 2.83 – 2.56 (m, 4H), 2.55 – 2.41 (m, 1H), 1.90 – 1.76 (m, 3H), 1.75 – 1.67 (m, 1H), 1.65 – 1.54 (m, 4H), 1.51 – 1.33 (m, 2H), 1.25 – 1.03 (m, 4H), 0.94 – 0.80 (m, 1H), 0.79 – 0.64 (m, 1H).  $^{13}\text{C NMR}$  (126 MHz,  $\text{CDCl}_3$ )  $\delta$  166.31, 141.88, 132.94, 129.80, 129.49, 128.30, 128.24, 128.20, 125.61, 81.12, 79.71, 72.65, 62.99, 39.32, 37.28, 36.32, 35.14, 33.85, 32.16, 31.97, 26.42, 26.06, 25.95, 19.48. HRMS-ESI (m/z)  $[\text{M}+\text{H}]^+$  calculated for  $\text{C}_{28}\text{H}_{35}\text{O}_3$ , 419.2581, found 419.2581.

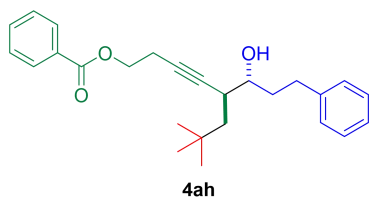

**4ah**,  $R_f = 0.6$  (EA:PE=1:3), column solvent: hexane/EtOAc = 15/1, 43%, colorless oil,  $^1\text{H NMR}$  (500 MHz,  $\text{CDCl}_3$ )  $\delta$  8.03 (d,  $J = 7.4$  Hz, 2H), 7.53 (t,  $J = 7.4$  Hz, 1H), 7.40 (t,  $J = 7.7$  Hz, 2H), 7.27 – 7.21 (m, 3H), 7.16 (d,  $J = 6.4$  Hz, 2H), 4.39 (t,  $J = 8.5$  Hz, 2H), 3.49 – 3.28 (m, 1H), 2.87 – 2.72 (m, 1H), 2.69 – 2.58 (m, 3H), 2.57 – 2.33 (m, 1H), 1.86 – 1.74 (m, 2H), 1.61 – 1.51 (m, 2H), 1.36 – 1.17 (m, 2H), 0.89 (s, 9H).  $^{13}\text{C NMR}$  (126 MHz,  $\text{CDCl}_3$ )  $\delta$  166.44, 142.14, 142.00, 133.07, 129.94, 129.65, 128.44, 128.36, 125.77, 82.75, 79.86, 74.21, 63.06, 46.19, 37.07, 35.14, 32.20, 30.72, 29.75, 19.60. HRMS-ESI (m/z)  $[\text{M}+\text{H}]^+$  calculated for  $\text{C}_{26}\text{H}_{33}\text{O}_3$ , 393.2424, found 393.2424.

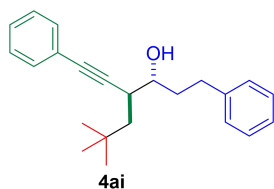

**4ai**,  $R_f = 0.6$  (EA:PE=1:3), column solvent: hexane/EtOAc = 15/1, 62%, colorless oil,  $^1\text{H NMR}$  (500 MHz,  $\text{CDCl}_3$ )  $\delta$  7.37 – 7.30 (m, 2H), 7.26 – 7.21 (m, 5H), 7.19 (d,  $J = 8.2$  Hz, 2H), 7.14 (t,  $J = 7.3$  Hz, 1H), 3.59 – 3.44 (m, 1H), 2.88 – 2.60 (m, 3H), 1.97 – 1.87 (m, 2H), 1.85 – 1.80 (m, 1H), 1.72 – 1.62 (m, 1H), 1.47 – 1.37 (m, 1H), 0.96 (s, 9H).  $^{13}\text{C NMR}$  (126 MHz,  $\text{CDCl}_3$ )  $\delta$  141.95, 131.46, 128.48, 128.39, 128.24, 127.85, 125.83, 123.48, 90.57, 84.43, 74.26, 45.97, 37.08, 35.79, 32.25, 30.80, 29.83. HRMS-ESI (m/z)  $[\text{M}+\text{H}]^+$  calculated for  $\text{C}_{23}\text{H}_{29}\text{O}$ , 321.2213, found 321.2213.

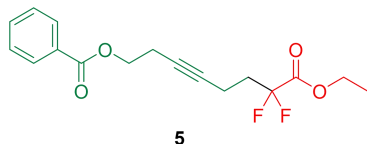

**5**,  $R_f = 0.6$  (EA:PE=1:3), column solvent: hexane/EtOAc = 20/1, 84%, colorless oil,  $^1\text{H NMR}$  (500 MHz,  $\text{CDCl}_3$ )  $\delta$  8.05 (d,  $J = 8.5$  Hz, 2H), 7.56 (t,  $J = 7.4$  Hz, 1H), 7.44 (t,  $J = 7.7$  Hz, 2H), 4.37 (t,  $J = 7.0$  Hz, 2H), 4.32 (q,  $J = 7.1$  Hz, 2H), 2.66 – 2.56 (m, 2H), 2.42 – 2.34 (m, 2H), 2.34 – 2.19 (m, 2H), 1.35 (t,  $J = 7.1$  Hz, 3H).  $^{13}\text{C NMR}$  (126 MHz,  $\text{CDCl}_3$ )  $\delta$  166.29, 163.73 (t,  $J = 33.3$  Hz), 133.00, 130.01, 129.60,

128.34, 115.14 (dd,  $J = 251.0, 250.1$  Hz), 78.97, 76.79, 62.93, 62.91, 34.02 (t,  $J = 23.5$  Hz), 19.27, 13.89, 11.74 (t,  $J = 6.1$  Hz).  $^{19}\text{F}$  NMR (471 MHz,  $\text{CDCl}_3$ )  $\delta$  -101.57 – -103.57 (m, 1F), -105.37 – -106.74 (m, 1F). HRMS-ESI (m/z)  $[\text{M}+\text{H}]^+$  calculated for  $\text{C}_{17}\text{H}_{19}\text{F}_2\text{O}_4$ , 325.1246, found 325.1243.

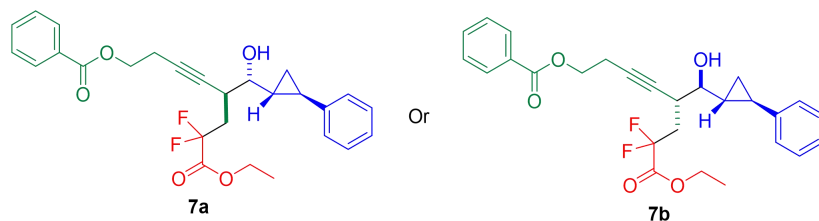

**7a (major product)**,  $R_f = 0.5$  (EA:PE=1:3), column solvent: hexane/EtOAc = 10/1, 43%, colorless oil,  $^1\text{H}$  NMR (500 MHz,  $\text{CDCl}_3$ )  $\delta$  8.05 (d,  $J = 7.0$  Hz, 2H), 7.57 (t,  $J = 7.4$  Hz, 1H), 7.44 (t,  $J = 7.8$  Hz, 2H), 7.22 (t,  $J = 7.5$  Hz, 2H), 7.14 (t,  $J = 7.3$  Hz, 1H), 6.98 (d,  $J = 7.1$  Hz, 2H), 4.48 – 4.35 (m, 2H), 4.33 – 4.25 (m, 2H), 3.13 – 3.04 (m, 1H), 2.98 – 2.91 (m, 1H), 2.68 – 2.59 (m, 2H), 2.51 – 2.34 (m, 2H), 1.87 – 1.77 (m, 1H), 1.43 – 1.36 (m, 1H), 1.33 (t,  $J = 7.2$  Hz, 3H), 1.10 – 1.02 (m, 1H), 0.93 – 0.83 (m, 1H).  $^{13}\text{C}$  NMR (126 MHz,  $\text{CDCl}_3$ )  $\delta$  166.50, 163.84 (t,  $J = 32.7$  Hz), 141.71, 133.17, 129.82, 129.69, 128.41, 128.33, 126.02, 125.78, 115.51 (dd,  $J = 252.3, 249.9$  Hz), 80.81, 79.28, 76.61, 62.89, 62.67, 36.79 (t,  $J = 23.0$  Hz), 33.18 – 32.56 (m), 26.81, 21.22, 19.64, 13.90, 13.70.  $^{19}\text{F}$  NMR (471 MHz,  $\text{CDCl}_3$ )  $\delta$  -102.53 – -103.40 (m, 1F), -106.20 (dt,  $J = 36.3, 18.5$  Hz, 1F). HRMS-ESI (m/z)  $[\text{M}+\text{Na}]^+$  calculated for  $\text{C}_{27}\text{H}_{28}\text{F}_2\text{NaO}_5$ , 493.1797, found 493.1807.

**7b (minor product)**,  $R_f = 0.5$  (EA:PE=1:3), column solvent: hexane/EtOAc = 10/1, 21%,  $^1\text{H}$  NMR (500 MHz,  $\text{CDCl}_3$ )  $\delta$  8.02 (d,  $J = 7.2$  Hz, 2H), 7.54 (t,  $J = 7.4$  Hz, 1H), 7.40 (t,  $J = 7.8$  Hz, 2H), 7.24 (t,  $J = 7.5$  Hz, 2H), 7.15 (t,  $J = 7.3$  Hz, 1H), 7.06 (d,  $J = 7.3$  Hz, 2H), 4.44 – 4.37 (m, 2H), 4.31 (dd,  $J = 14.1, 7.0$  Hz, 2H), 3.12 – 3.04 (m, 1H), 3.01 – 2.90 (m, 1H), 2.69 – 2.61 (m, 2H), 2.50 – 2.36 (m, 2H), 2.04 – 1.98 (m, 1H), 1.61 (s, 1H), 1.46 – 1.39 (m, 1H), 1.34 (t,  $J = 7.2$  Hz, 3H), 1.02 – 0.90 (m, 2H).  $^{13}\text{C}$  NMR (126 MHz,  $\text{CDCl}_3$ )  $\delta$  166.40, 163.86 (t,  $J = 32.5$  Hz), 142.12, 133.11, 129.80, 129.60, 128.38, 128.33, 125.91, 125.72, 115.53 (dd,  $J = 252.1, 249.8$  Hz), 80.71, 79.20, 76.90, 62.90, 62.71, 36.94 (t,  $J = 23.0$  Hz), 32.75 – 32.37 (m), 27.39, 21.45, 19.57, 13.92, 13.31.  $^{19}\text{F}$  NMR (471 MHz,  $\text{CDCl}_3$ )  $\delta$  -102.62 – -103.48 (m, 1F), -106.24 (dt,  $J = 36.3, 17.8$  Hz, 1F). HRMS-ESI (m/z)  $[\text{M}+\text{Na}]^+$  calculated for  $\text{C}_{27}\text{H}_{28}\text{F}_2\text{NaO}_5$ , 493.1797, found 493.1807.

## 8. NMR spectra of the products

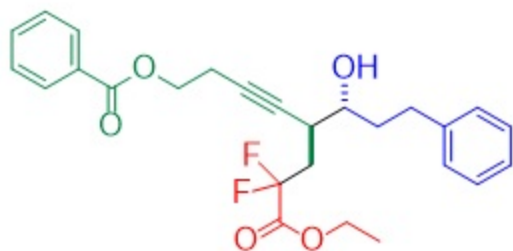

**4a**  
500 MHz, CDCl<sub>3</sub>

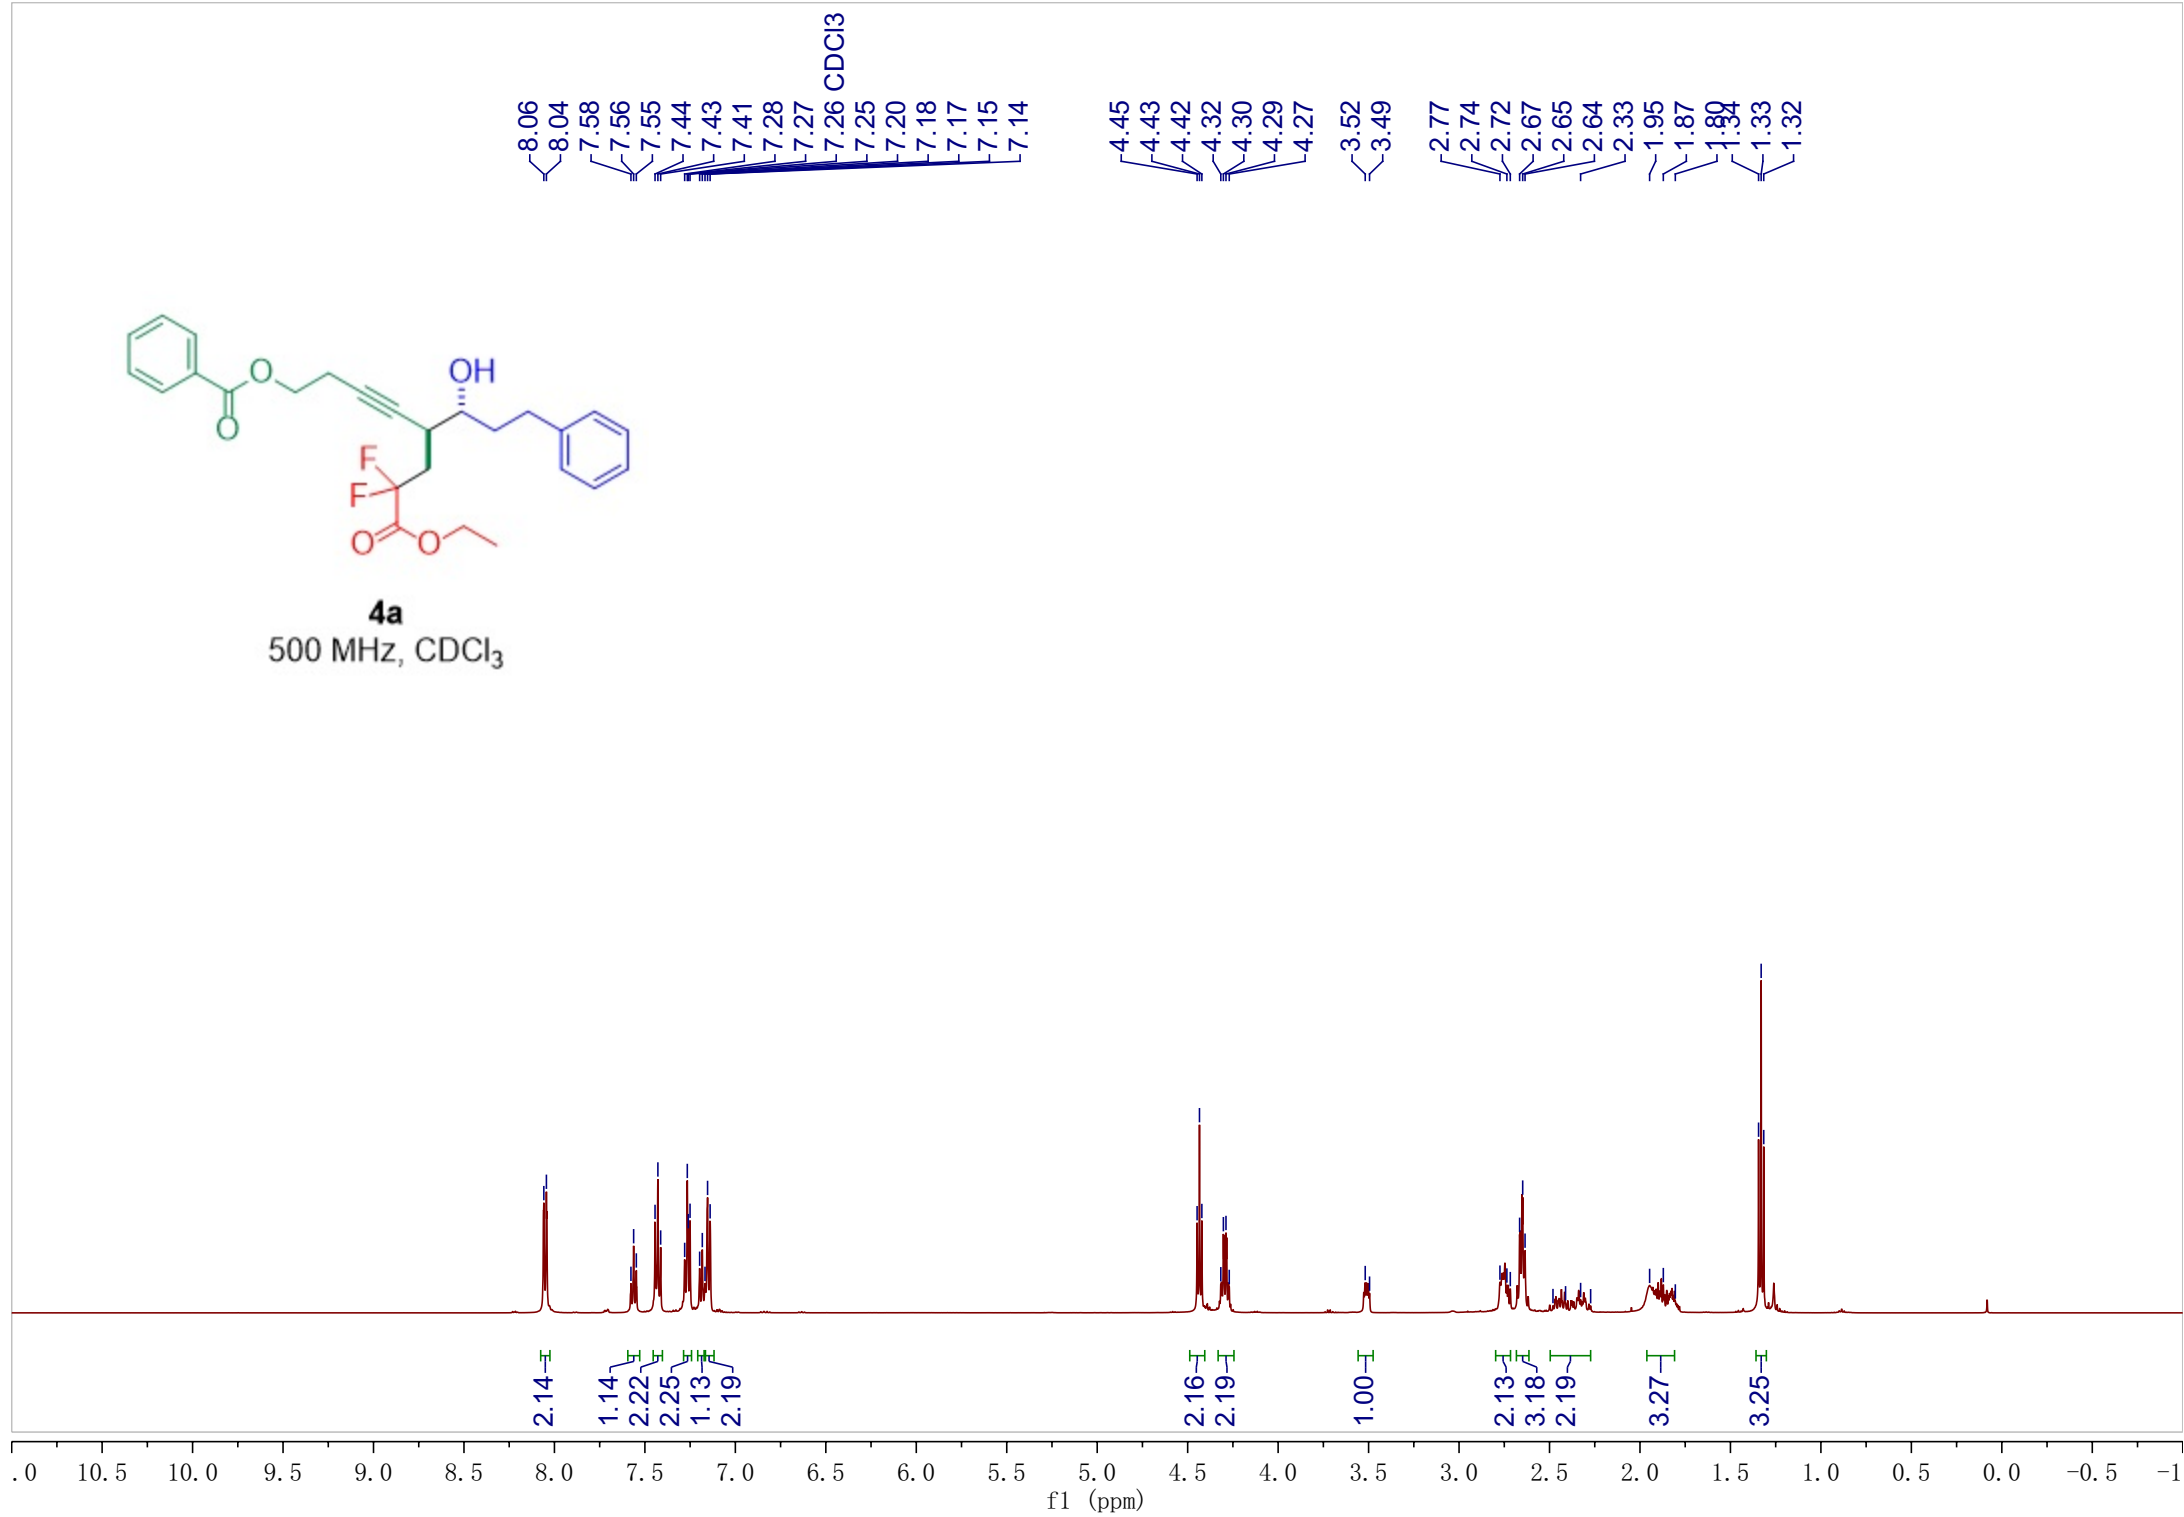



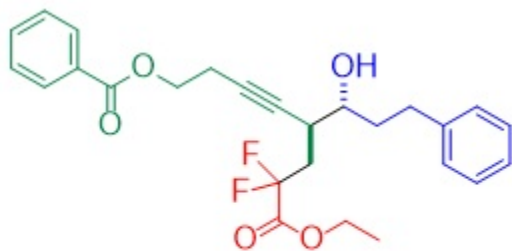

**4a**  
126 MHz, CDCl<sub>3</sub>

166.50  
164.11  
163.85  
163.59

141.42  
133.15  
129.61  
128.39  
128.35  
125.89  
117.80  
115.51  
115.50  
113.51

80.89  
78.81  
77.25  
77.00 CDCl<sub>3</sub>  
76.75  
72.40  
62.85  
62.71

37.22  
37.07  
37.03  
36.85  
32.53  
32.50  
32.48  
31.94  
19.58  
13.87

A (t)  
163.85  
H

B (dd)  
115.51  
H

D (t)  
37.03  
H

C (m)  
32.50  
H

210 200 190 180 170 160 150 140 130 120 110 100 90 80 70 60 50 40 30 20 10 0 -10  
f1 (ppm)

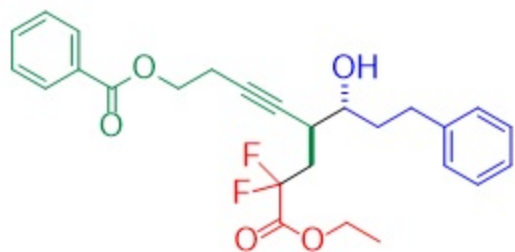

**4a**

471 MHz, CDCl<sub>3</sub>

102.81  
102.84  
102.88  
103.37  
103.40  
103.43

105.89  
105.93  
105.97  
106.45  
106.49  
106.53

-96 -97 -98 -99 -100 -101 -102 -103 -104 -105 -106 -107 -108 -109 -110 -111 -112 -113 -114

f1 (ppm)

1.00

1.00

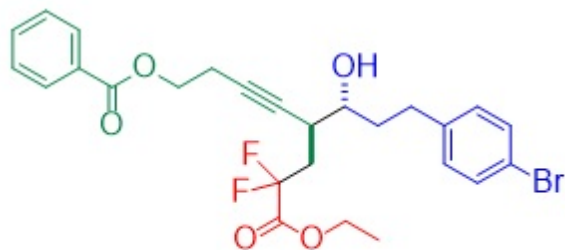

**4b**

500 MHz, CDCl<sub>3</sub>

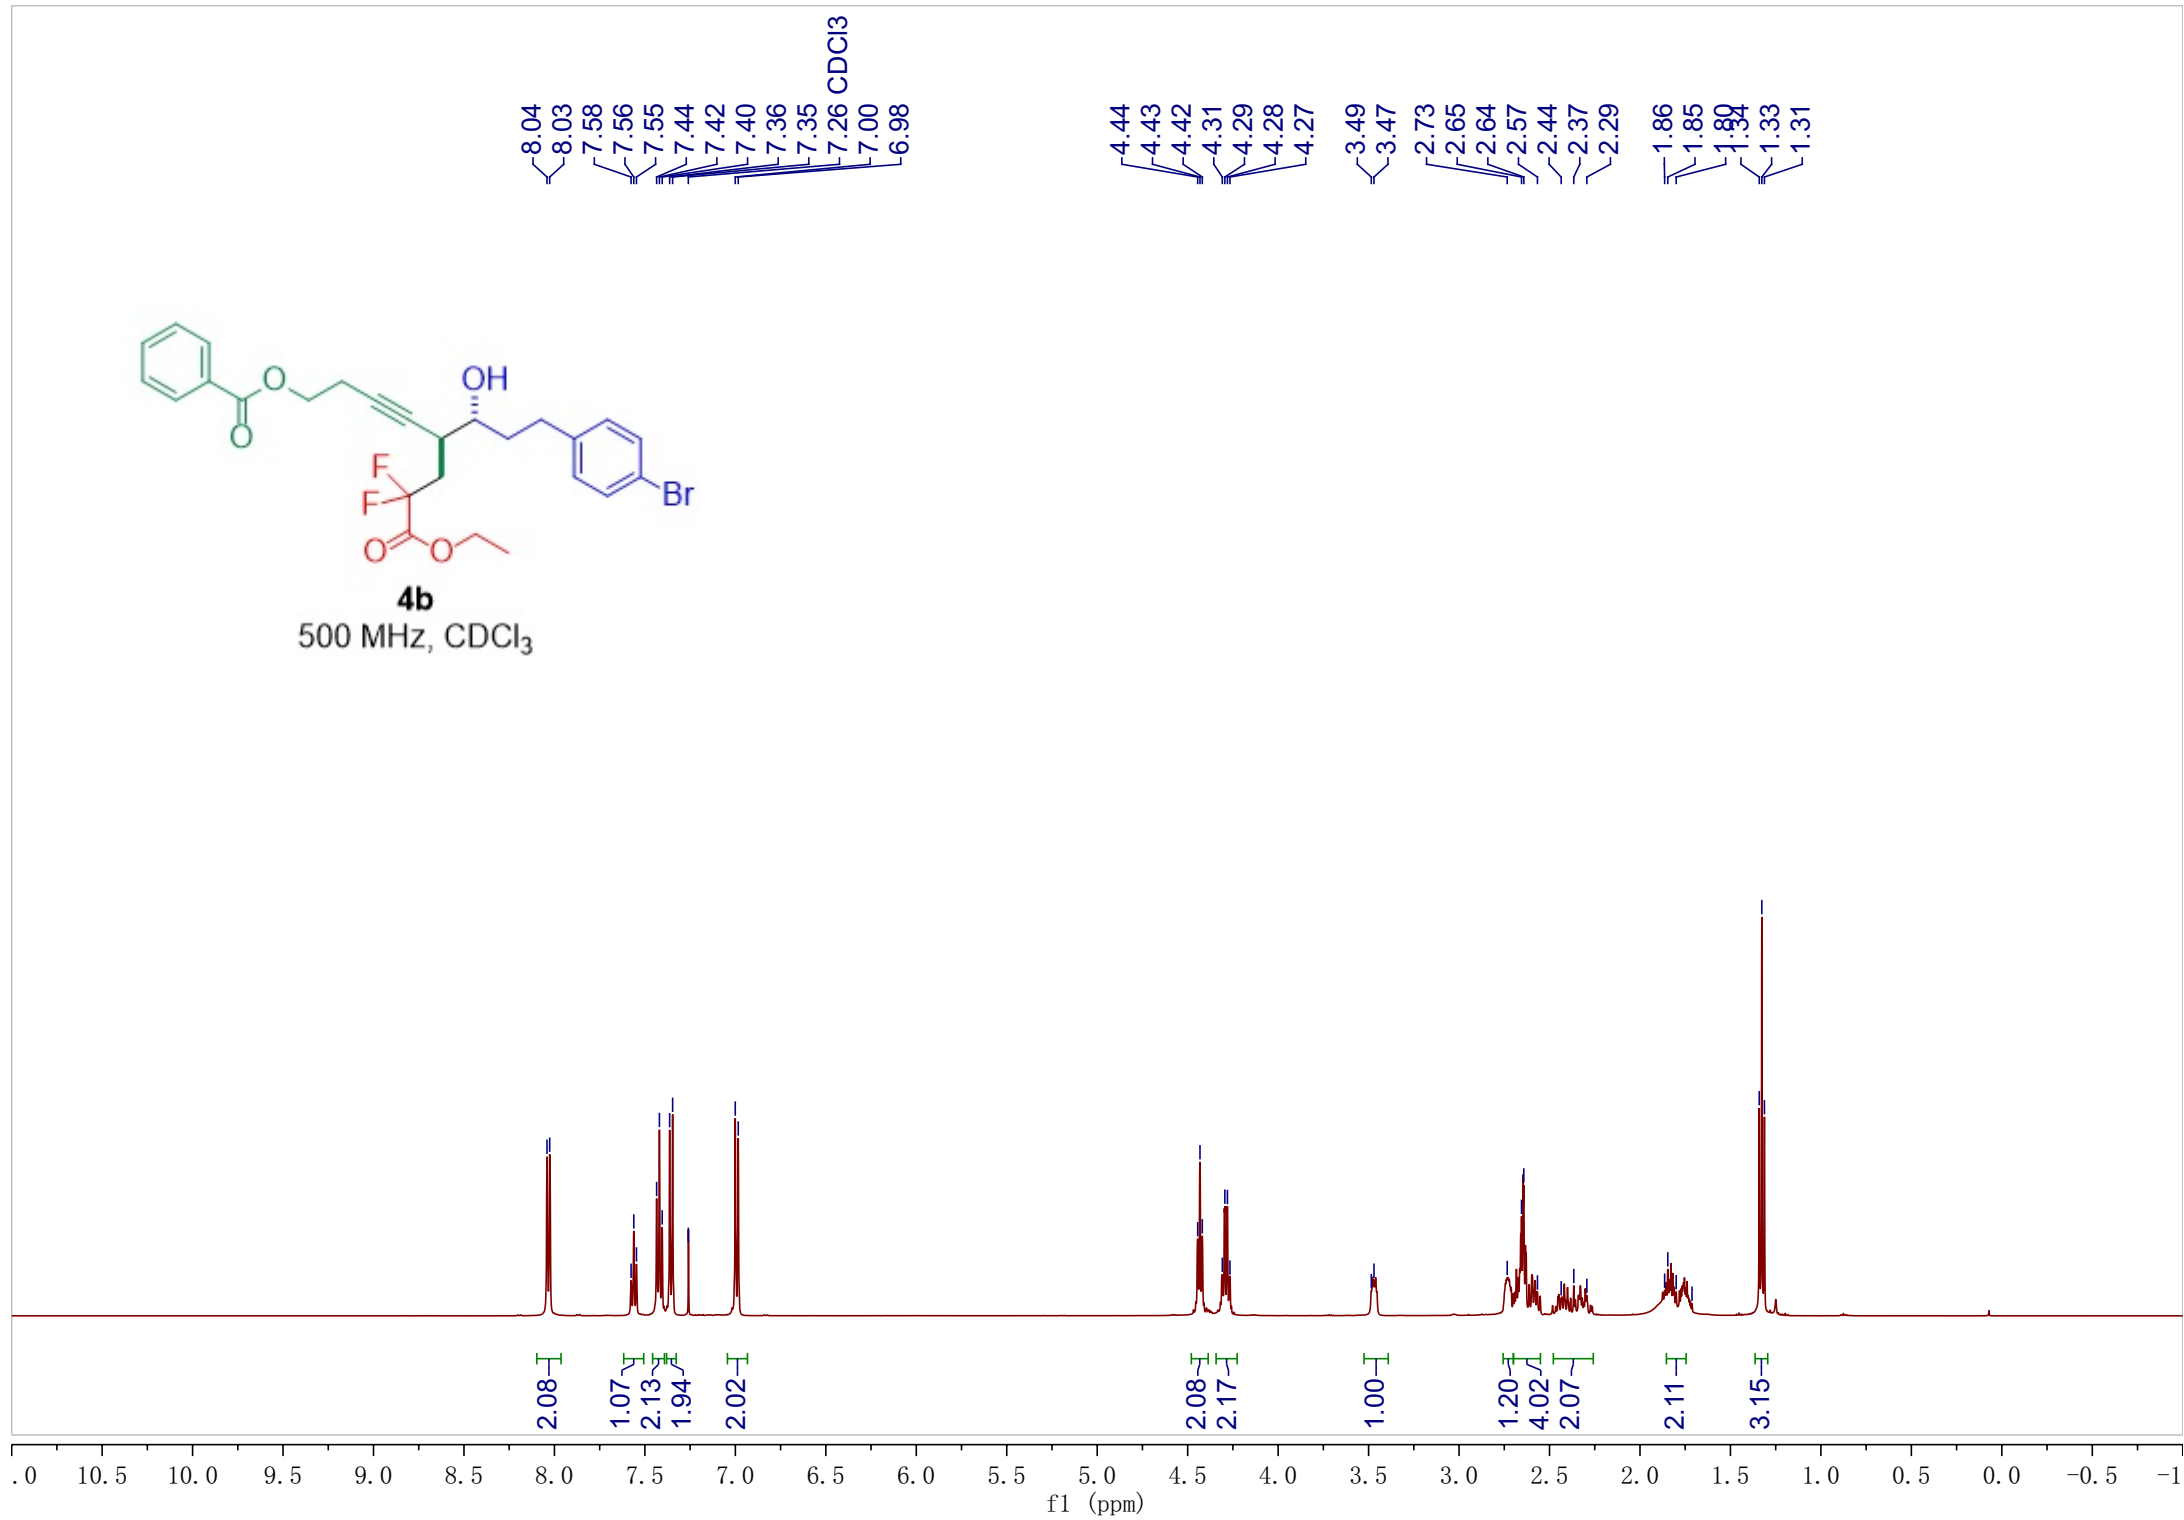

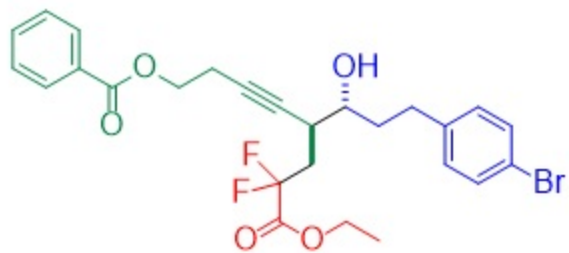

**4b**

126 MHz, CDCl<sub>3</sub>

166.52  
164.08  
163.83  
163.57

140.40  
131.41  
130.12  
129.60  
119.60  
117.46  
115.47  
115.46  
113.47

81.06  
78.70  
77.25  
77.00 CDCl<sub>3</sub>  
76.75  
72.20  
62.89  
62.68

37.20  
37.02  
36.93  
36.84  
32.56  
32.53  
31.35  
19.62  
13.88

A (t)  
163.83  
H

B (dd)  
115.46  
H

C (t)  
37.02  
H H

D (m)  
32.54

210 200 190 180 170 160 150 140 130 120 110 100 90 80 70 60 50 40 30 20 10 0 -10

f1 (ppm)

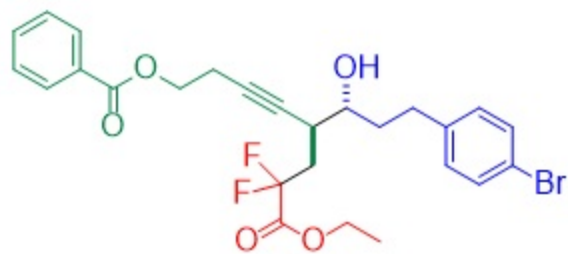

**4b**  
471 MHz, CDCl<sub>3</sub>

102.89  
102.93  
102.97  
103.45  
103.49  
103.52

105.90  
105.94  
105.98  
106.45  
106.49  
106.53

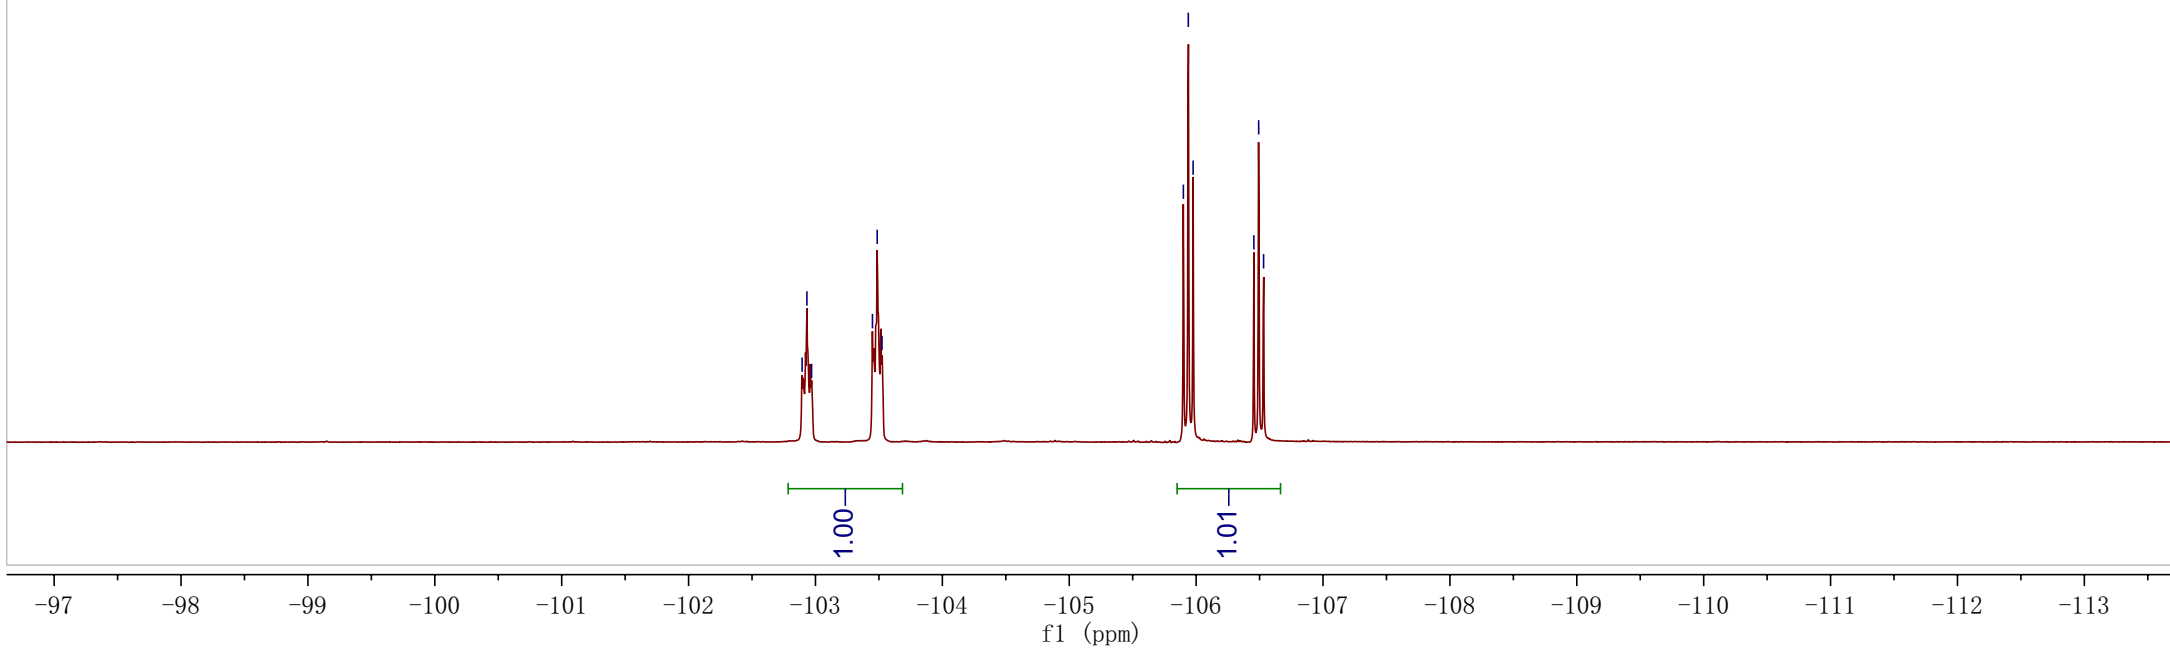

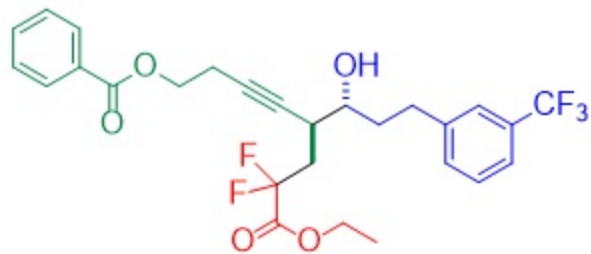

**4c**

500 MHz, CDCl<sub>3</sub>

8.04  
8.03  
7.56  
7.55  
7.53  
7.45  
7.43  
7.41  
7.40  
7.38  
7.36  
7.35  
7.32  
7.30  
7.26 CDCl<sub>3</sub>

4.45  
4.44  
4.43  
4.31  
4.30  
4.29  
4.27  
— 3.50  
2.80  
2.75  
2.71  
2.67  
2.65  
2.64  
2.43  
1.88  
1.87  
1.84  
1.33  
1.31

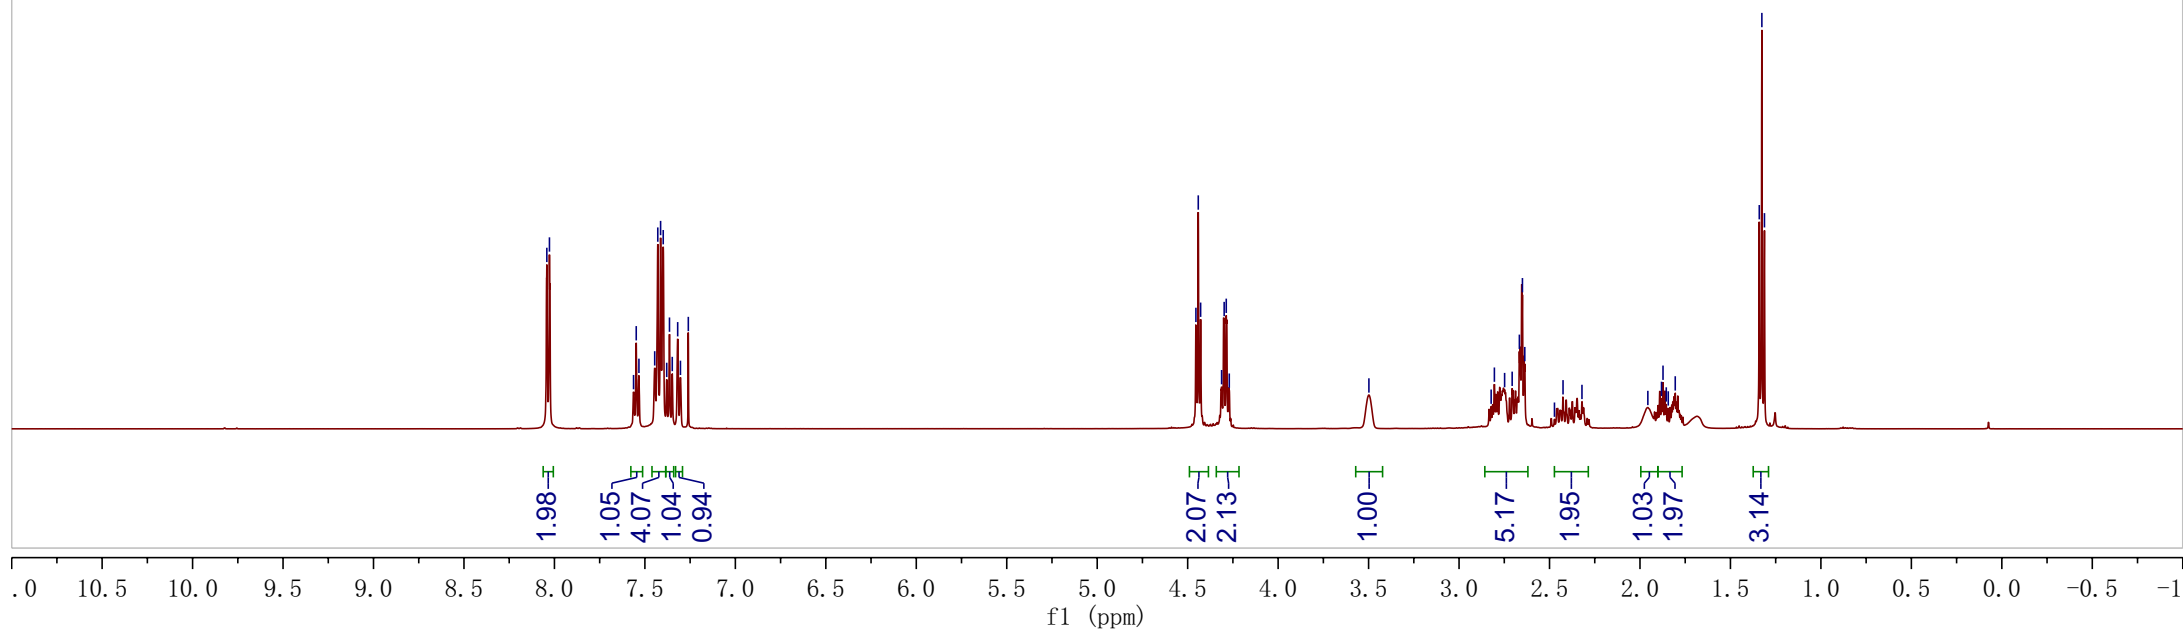

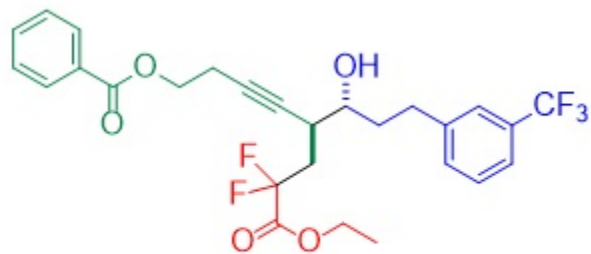

**4c**  
126 MHz, CDCl<sub>3</sub>

166.55  
164.09  
163.83  
163.57

142.39

133.20

131.79

130.76

130.51

129.72

129.60

128.80

128.40

125.08

125.05

125.02

124.99

122.83

122.80

122.77

81.16

78.68

77.25

77.00 CDCl<sub>3</sub>

76.75

72.23

62.91

62.65

37.19

37.00

36.85

32.64

32.62

32.59

31.78

19.63

13.87

A (t)  
163.83  
H

B (q)  
130.64  
H

F (q)  
124.17

C (q)  
125.04

E (m)  
115.46

D (q)  
122.81

H (t)  
37.01

G (m)  
32.60  
H H

210 200 190 180 170 160 150 140 130 120 110 100 90 80 70 60 50 40 30 20 10 0 -10

f1 (ppm)

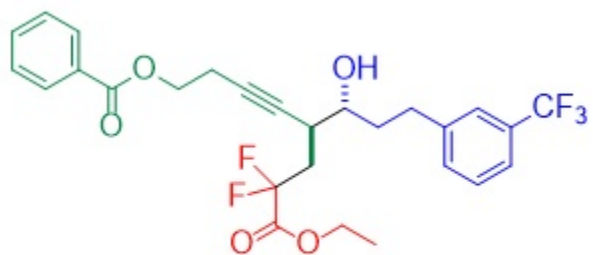

**4c**  
471 MHz, CDCl<sub>3</sub>

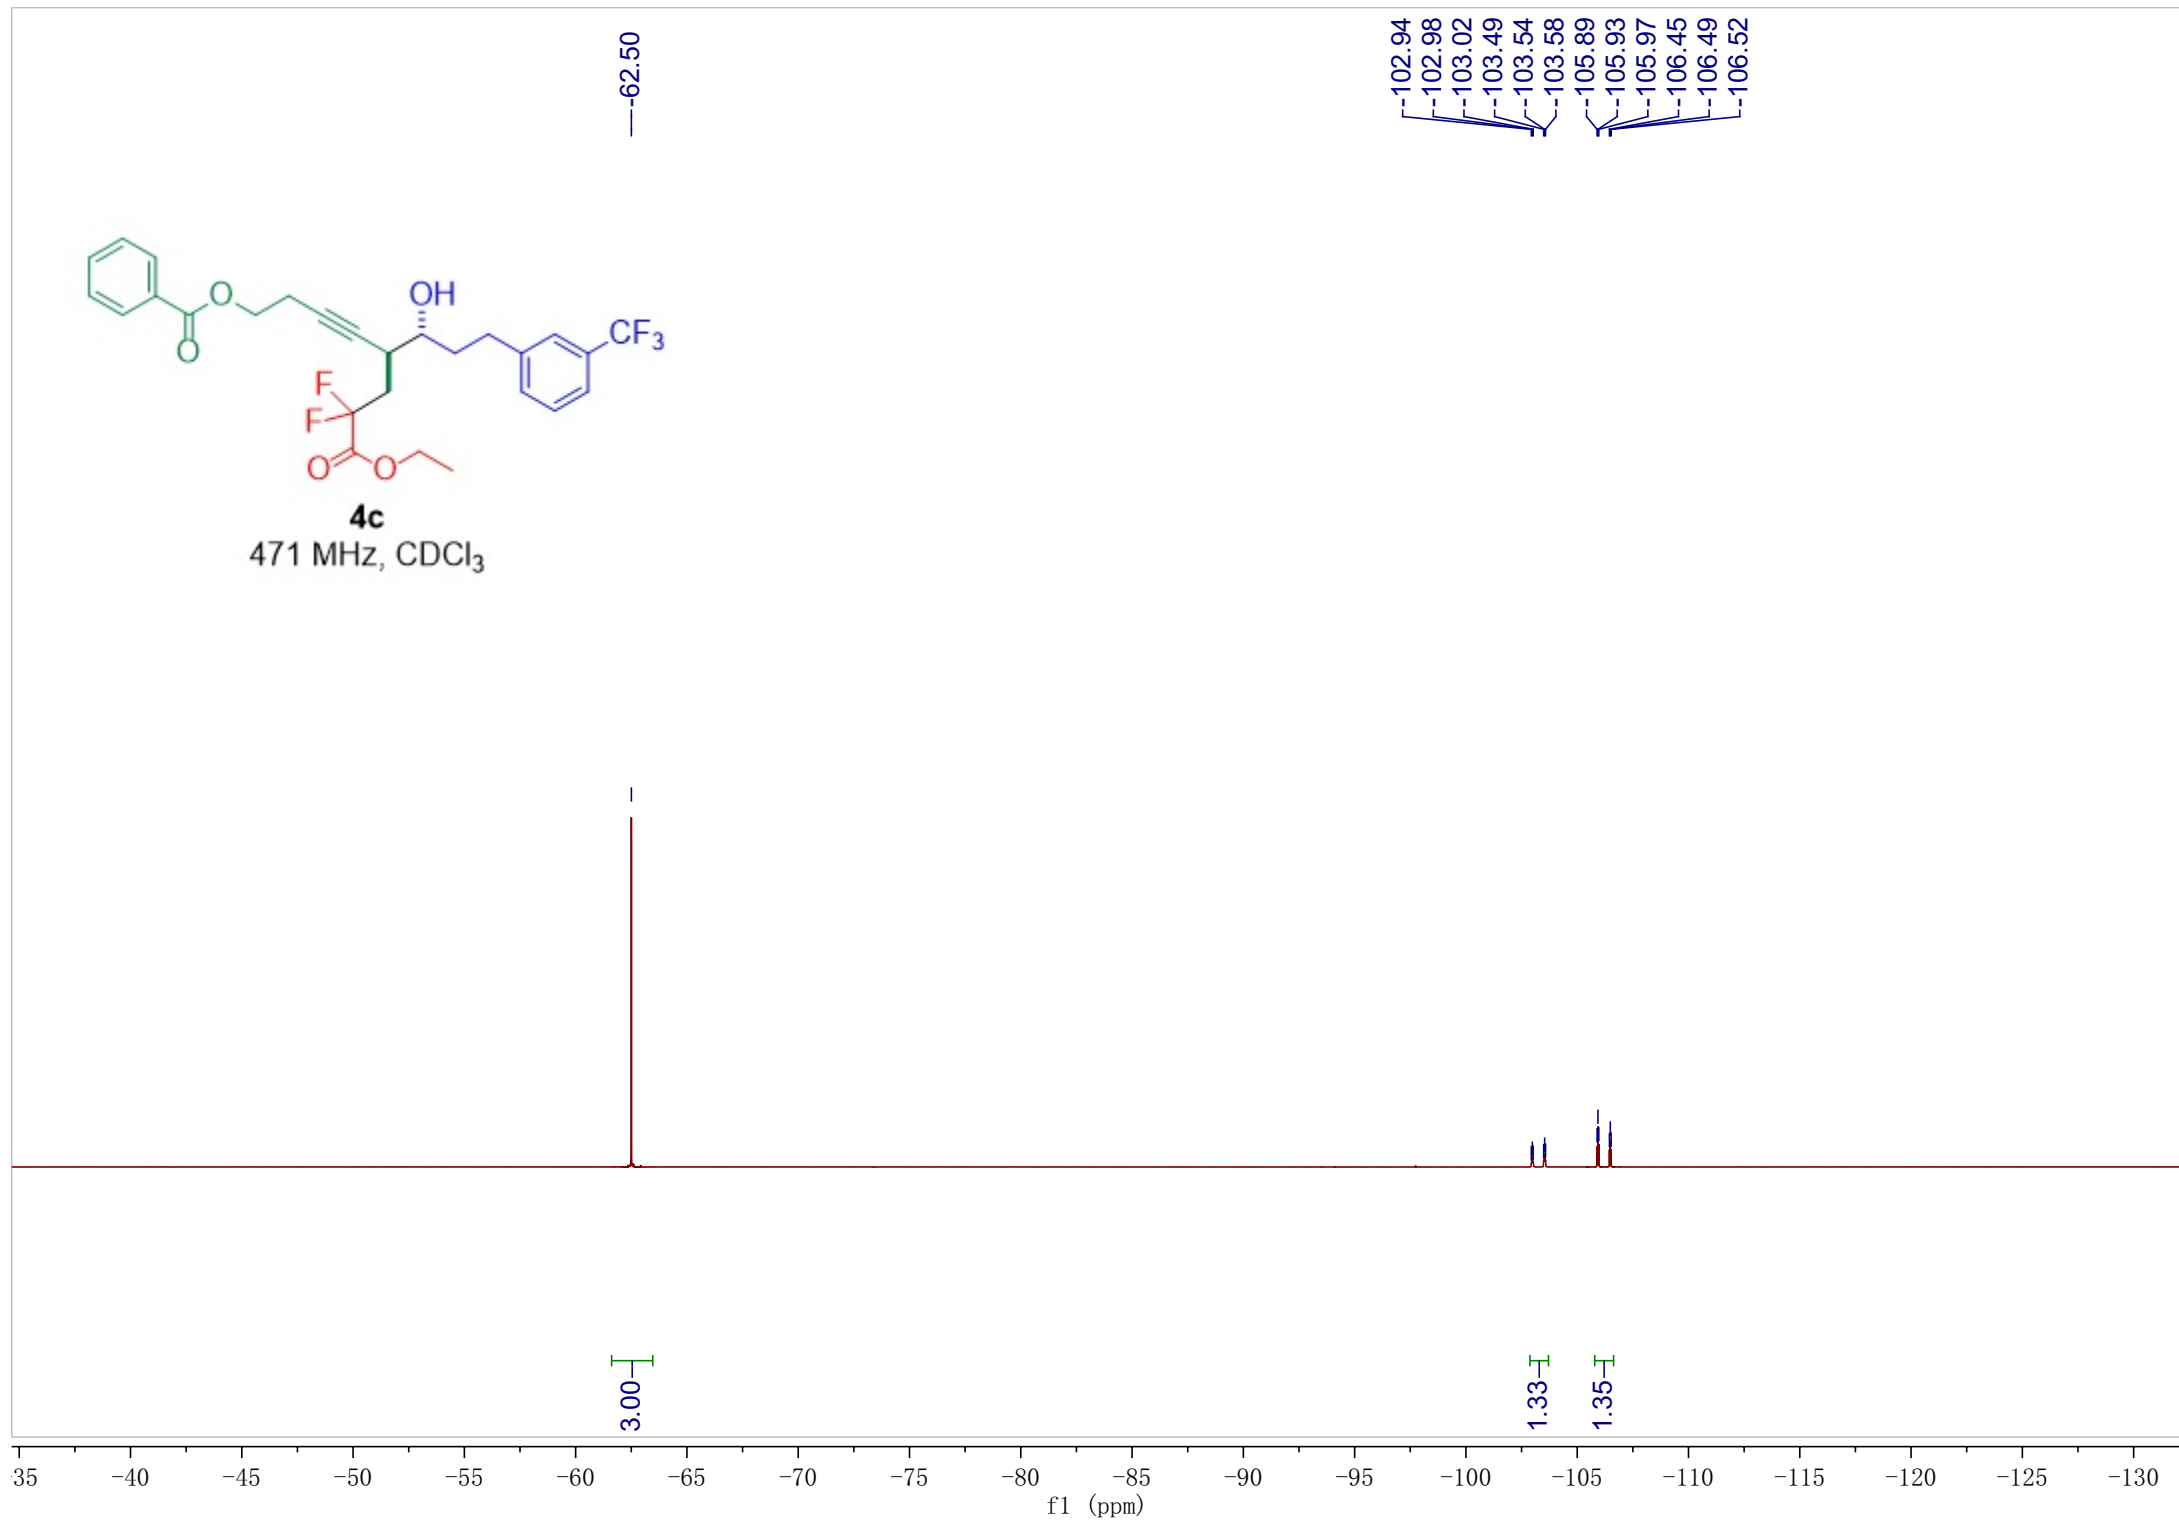



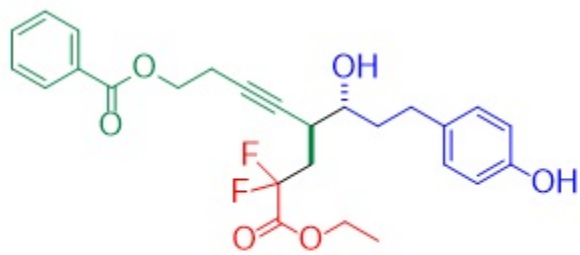

**4d**  
500 MHz, CDCl<sub>3</sub>

8.05  
8.04  
7.58  
7.56  
7.55  
7.44  
7.43  
7.41  
7.26 CDCl<sub>3</sub>  
7.00  
6.98  
6.74  
6.72

5.30

4.44  
4.42  
4.41  
4.31  
4.30  
4.29  
4.28  
4.28  
4.27  
3.45

2.66  
2.64  
2.63  
2.58  
2.45  
2.42  
2.33

1.92  
1.77  
1.34  
1.33  
1.31

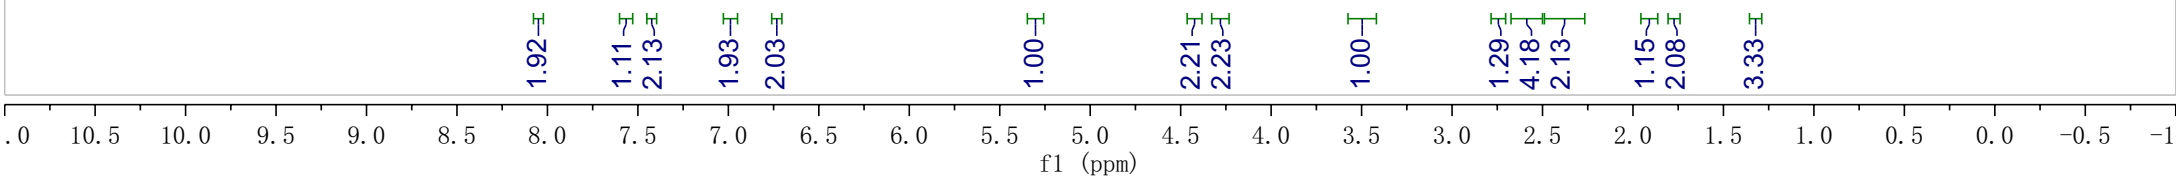

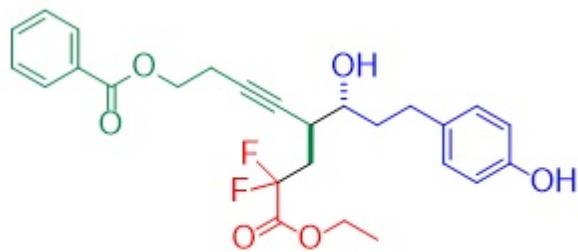

**4d**  
126 MHz, CDCl<sub>3</sub>

166.64  
164.18  
163.92  
163.66  
— 153.86

133.37  
133.22  
129.72  
129.65  
129.43  
128.43  
117.51  
115.52  
115.51  
115.26  
113.52

80.86  
78.85  
77.25  
77.00 CDCl<sub>3</sub>  
76.75  
72.39  
62.92  
62.78

37.24  
37.20  
37.02  
36.84  
32.47  
31.00  
— 19.59  
— 13.89

A (t)  
163.92  
H

B (dd)  
115.52  
H

D (t)  
37.02  
H

C (m)  
32.47  
H

210 200 190 180 170 160 150 140 130 120 110 100 90 80 70 60 50 40 30 20 10 0 -10  
f1 (ppm)

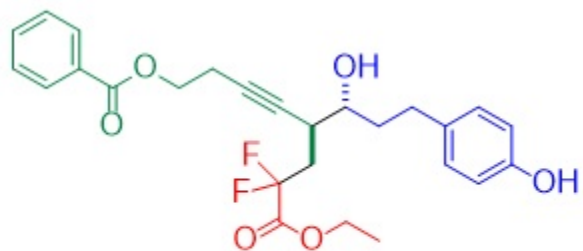

**4d**  
471 MHz, CDCl<sub>3</sub>

102.83  
102.85  
102.86  
102.89  
103.38  
103.41  
103.42  
103.44  
105.91  
105.95  
105.99  
106.47  
106.50  
106.54

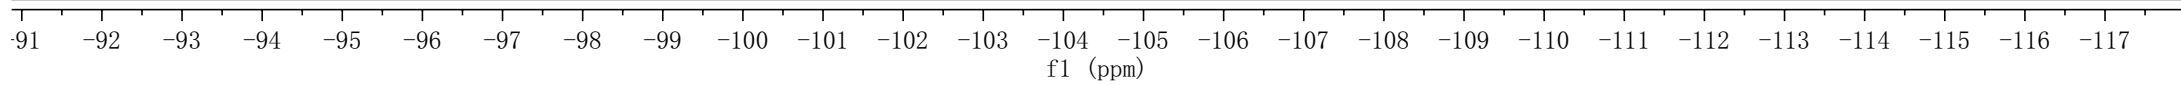

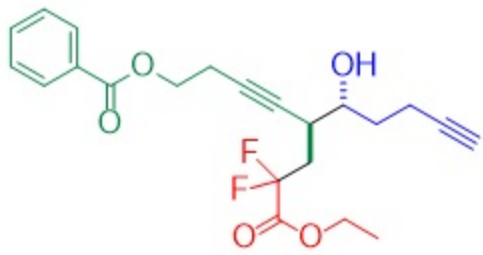

**4e**  
500 MHz, CDCl<sub>3</sub>

8.05  
8.04  
7.59  
7.57  
7.56  
7.46  
7.45  
7.43  
7.26 CDCl<sub>3</sub>

4.44  
4.43  
4.41  
4.32  
4.31  
4.30  
4.28  
3.68  
2.75  
2.66  
2.64  
2.63  
2.46  
2.43  
2.41  
2.37  
2.34  
2.29  
2.27  
2.25  
1.95  
1.95  
1.94  
1.78  
1.77  
1.74  
1.70  
1.69  
1.35  
1.34  
1.32

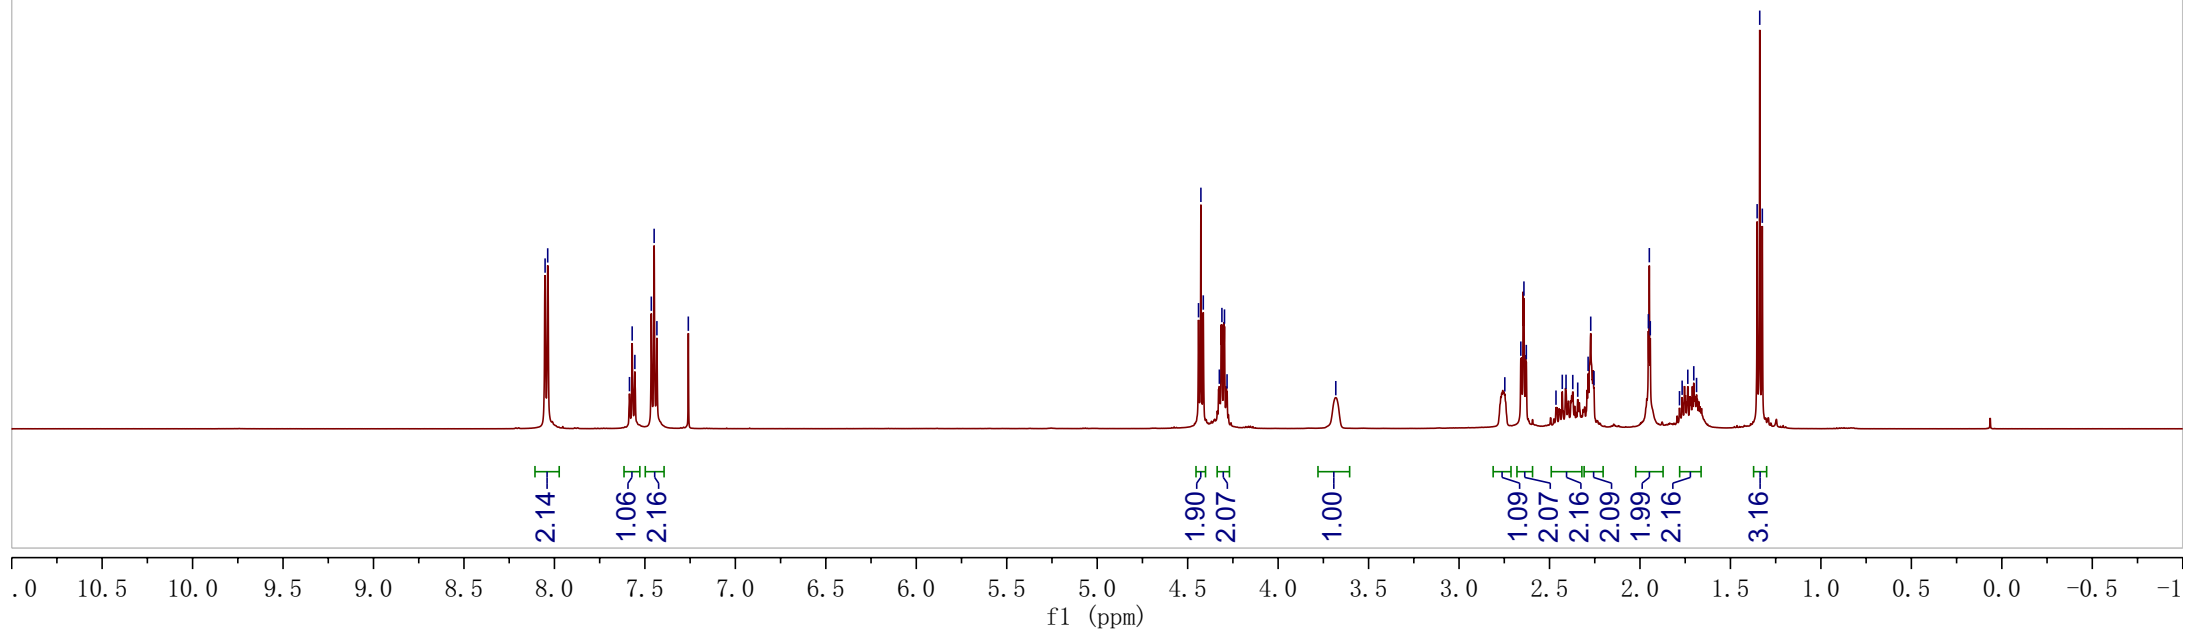

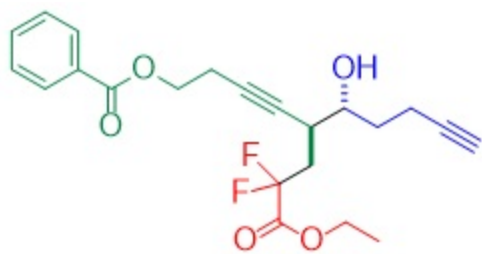

**4e**  
126 MHz, CDCl<sub>3</sub>

166.49  
164.10  
163.84  
163.58

133.18  
129.77  
129.62  
128.42  
117.47  
115.48  
115.46  
113.47

83.43  
80.99  
78.68  
77.25  
77.00 CDCl<sub>3</sub>  
76.75  
71.84  
69.01  
62.90  
62.67

37.09  
36.91  
36.73  
33.90  
32.43  
32.40  
19.58  
14.99  
13.90

A (t)  
163.84  
H

B (dd)  
115.47  
H

C (t)  
36.91  
H

D (m)  
32.42  
H

210 200 190 180 170 160 150 140 130 120 110 100 90 80 70 60 50 40 30 20 10 0 -10

f1 (ppm)

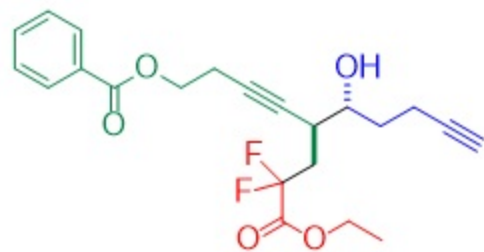

**4e**  
471 MHz, CDCl<sub>3</sub>

102.91  
102.94  
102.98  
103.47  
103.50  
103.53

105.88  
105.92  
105.95  
106.43  
106.47  
106.51

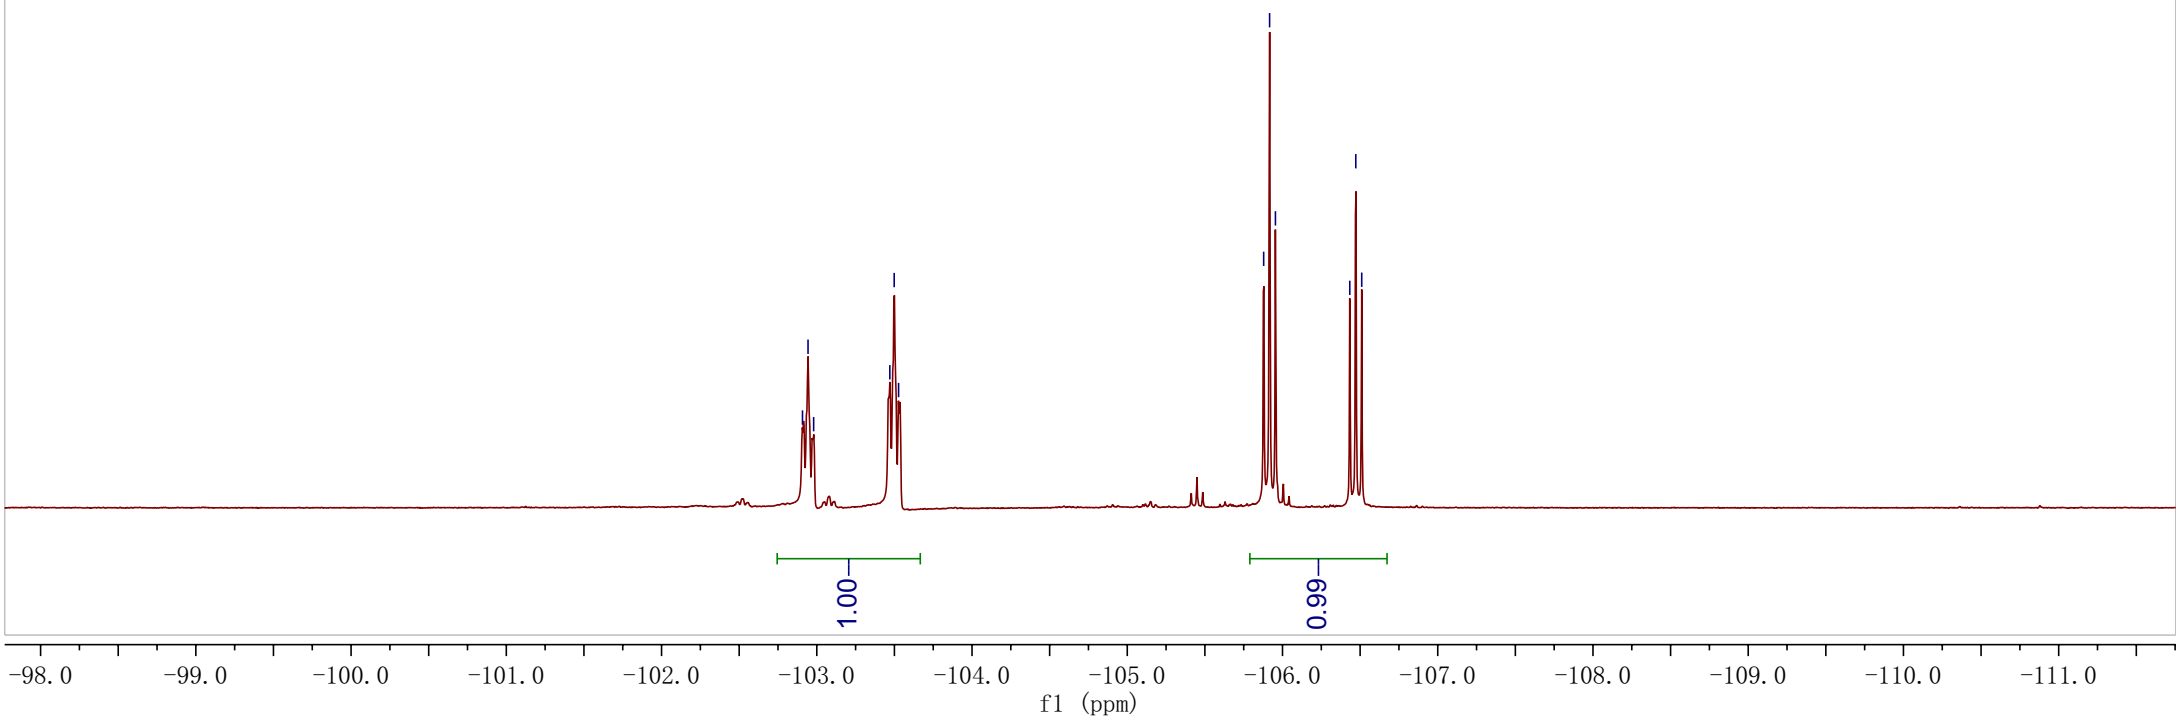

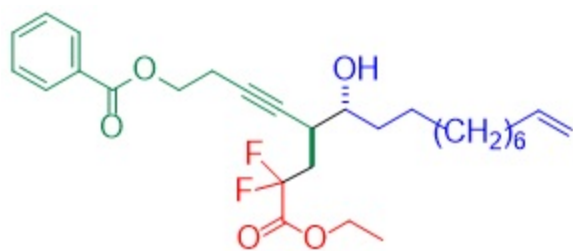

**4f**  
500 MHz, CDCl<sub>3</sub>

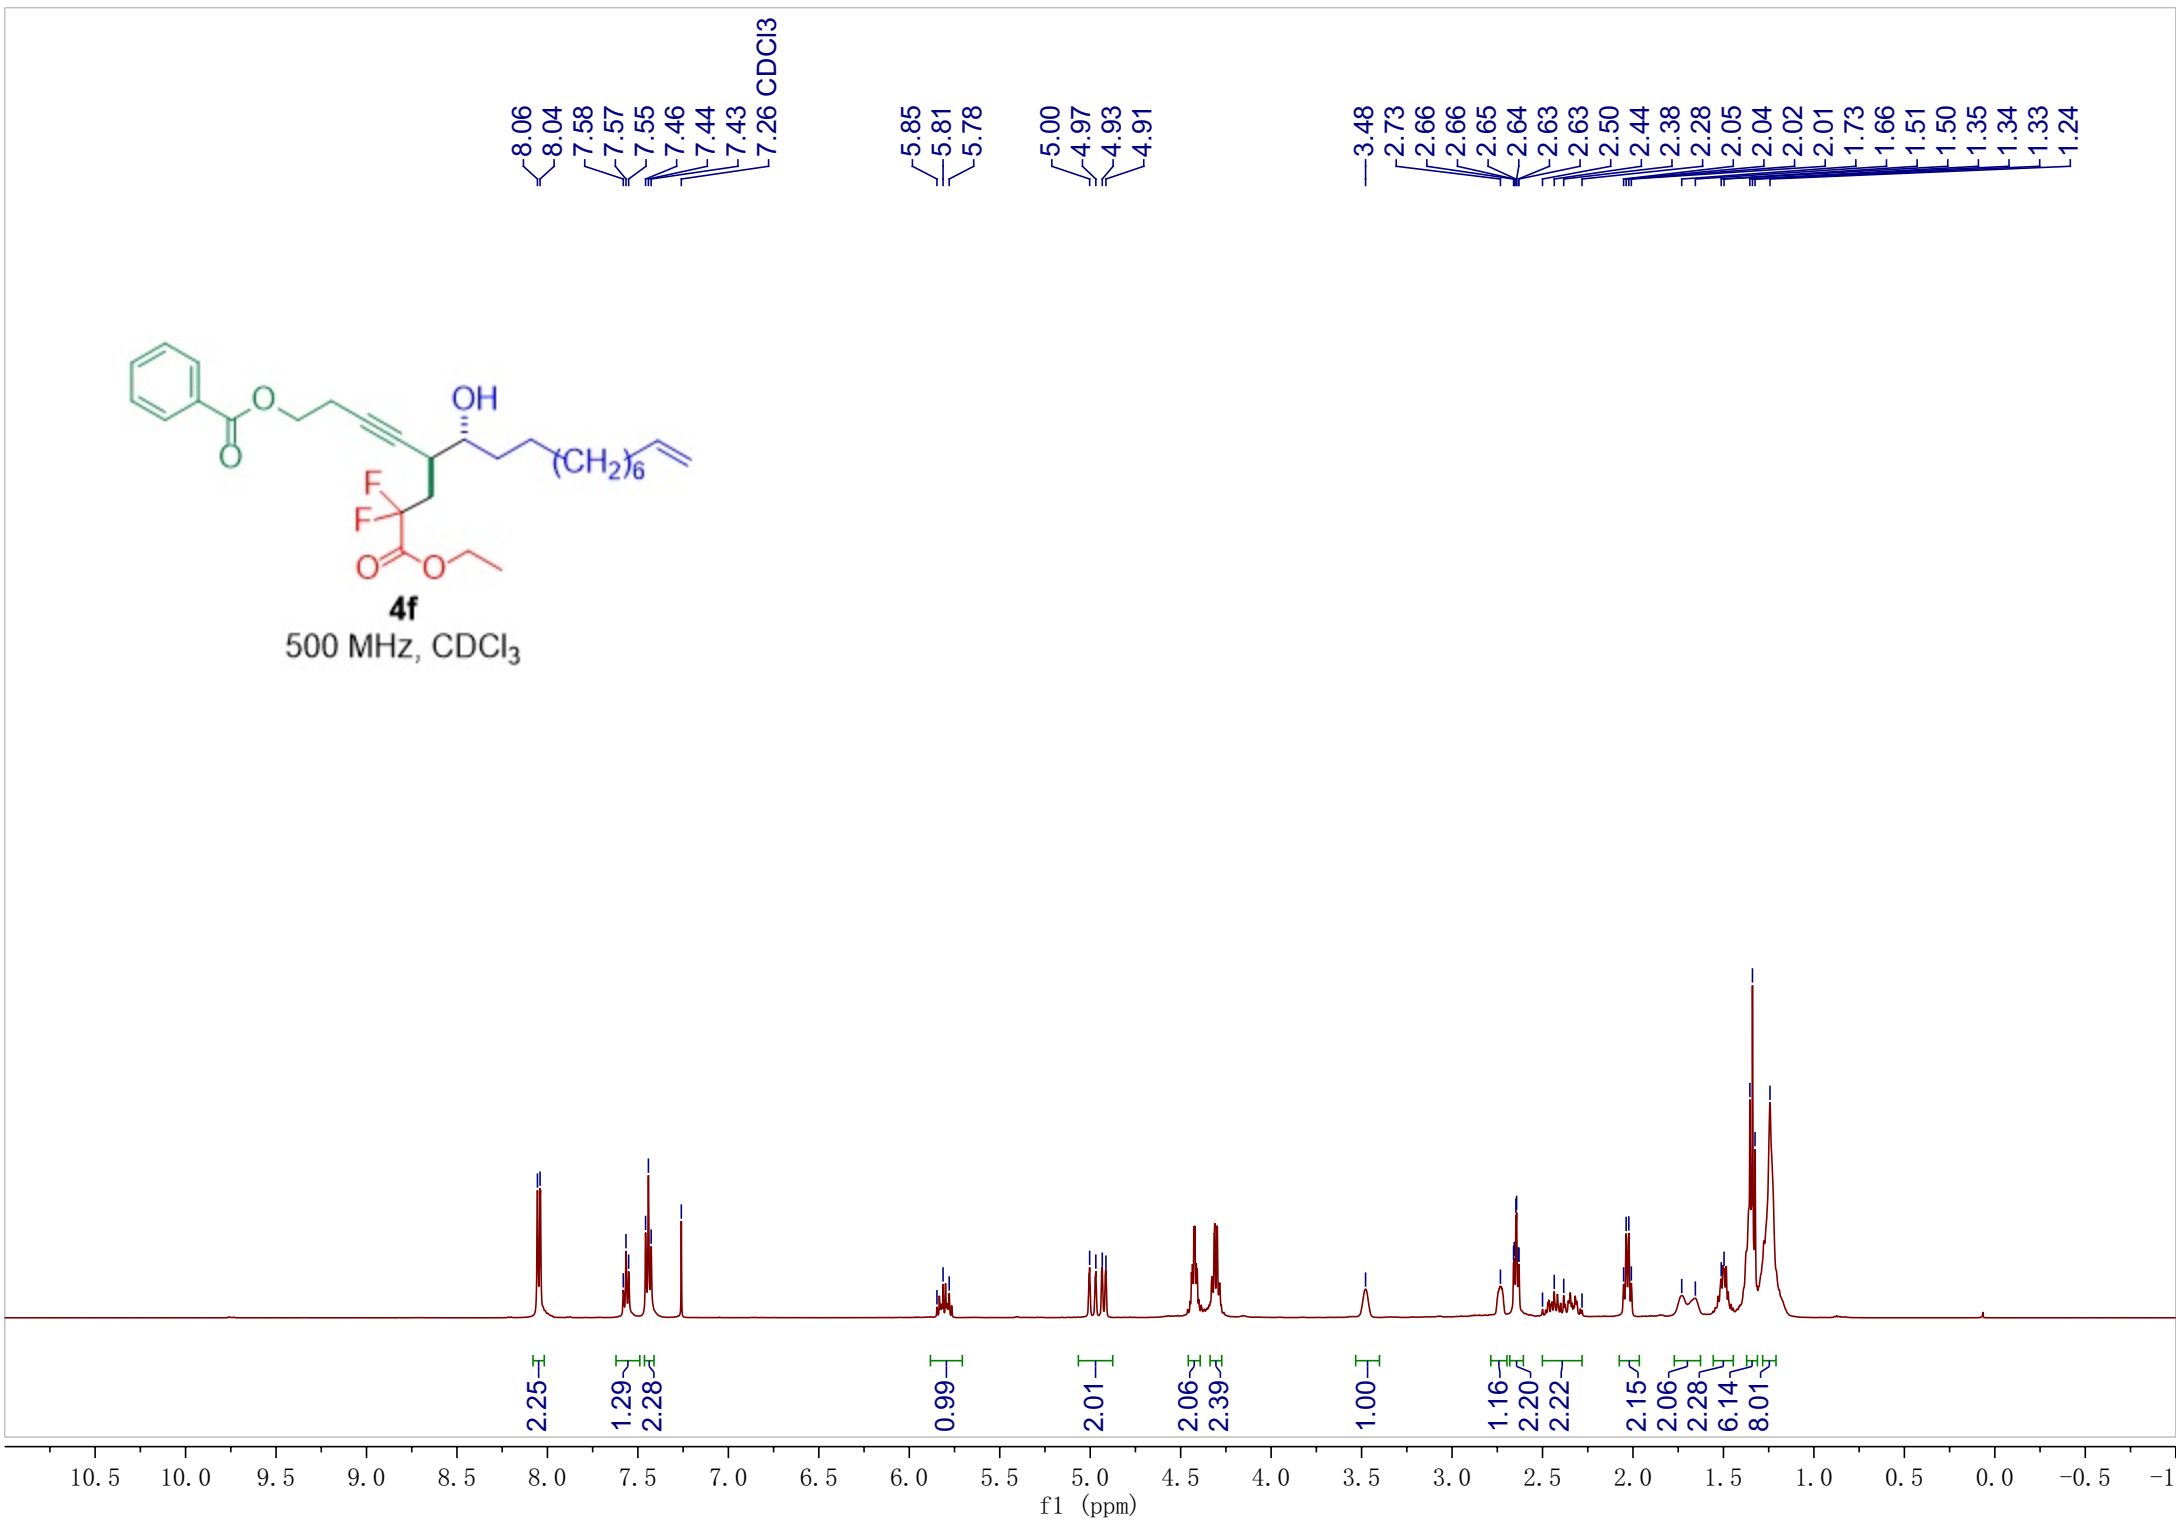

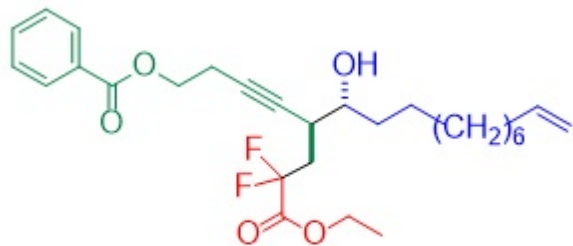

**4f**  
126 MHz, CDCl<sub>3</sub>

166.47  
164.18  
163.92  
163.66

139.18  
133.14  
129.82  
129.63  
128.38  
117.59  
115.61  
115.59  
114.10  
113.60

80.63  
78.96  
77.25  
77.00 CDCl<sub>3</sub>  
76.75  
73.22  
62.85  
62.75

37.33  
37.14  
36.96  
35.56  
33.77  
32.35  
29.47  
29.39  
29.35  
29.06  
28.88  
25.78  
19.57  
13.90

A (t)  
163.92  
H

B (dd)  
115.60  
H

C (t)  
37.14  
H H

D (m)  
32.35

210 200 190 180 170 160 150 140 130 120 110 100 90 80 70 60 50 40 30 20 10 0 -10  
f1 (ppm)



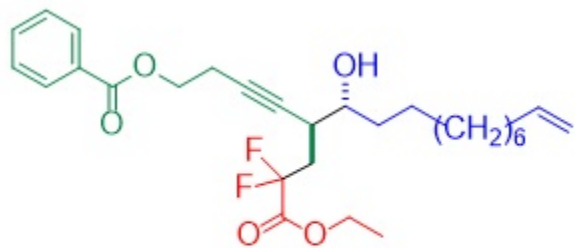

**4f**  
471 MHz, CDCl<sub>3</sub>

102.77  
102.80  
102.83  
103.32  
103.35  
103.39  
105.98  
106.02  
106.06  
106.53  
106.57  
106.61

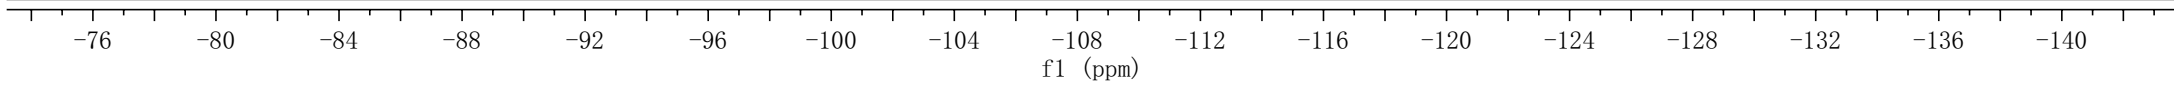

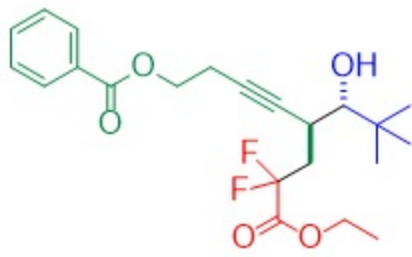

**4g**  
500 MHz, CDCl<sub>3</sub>

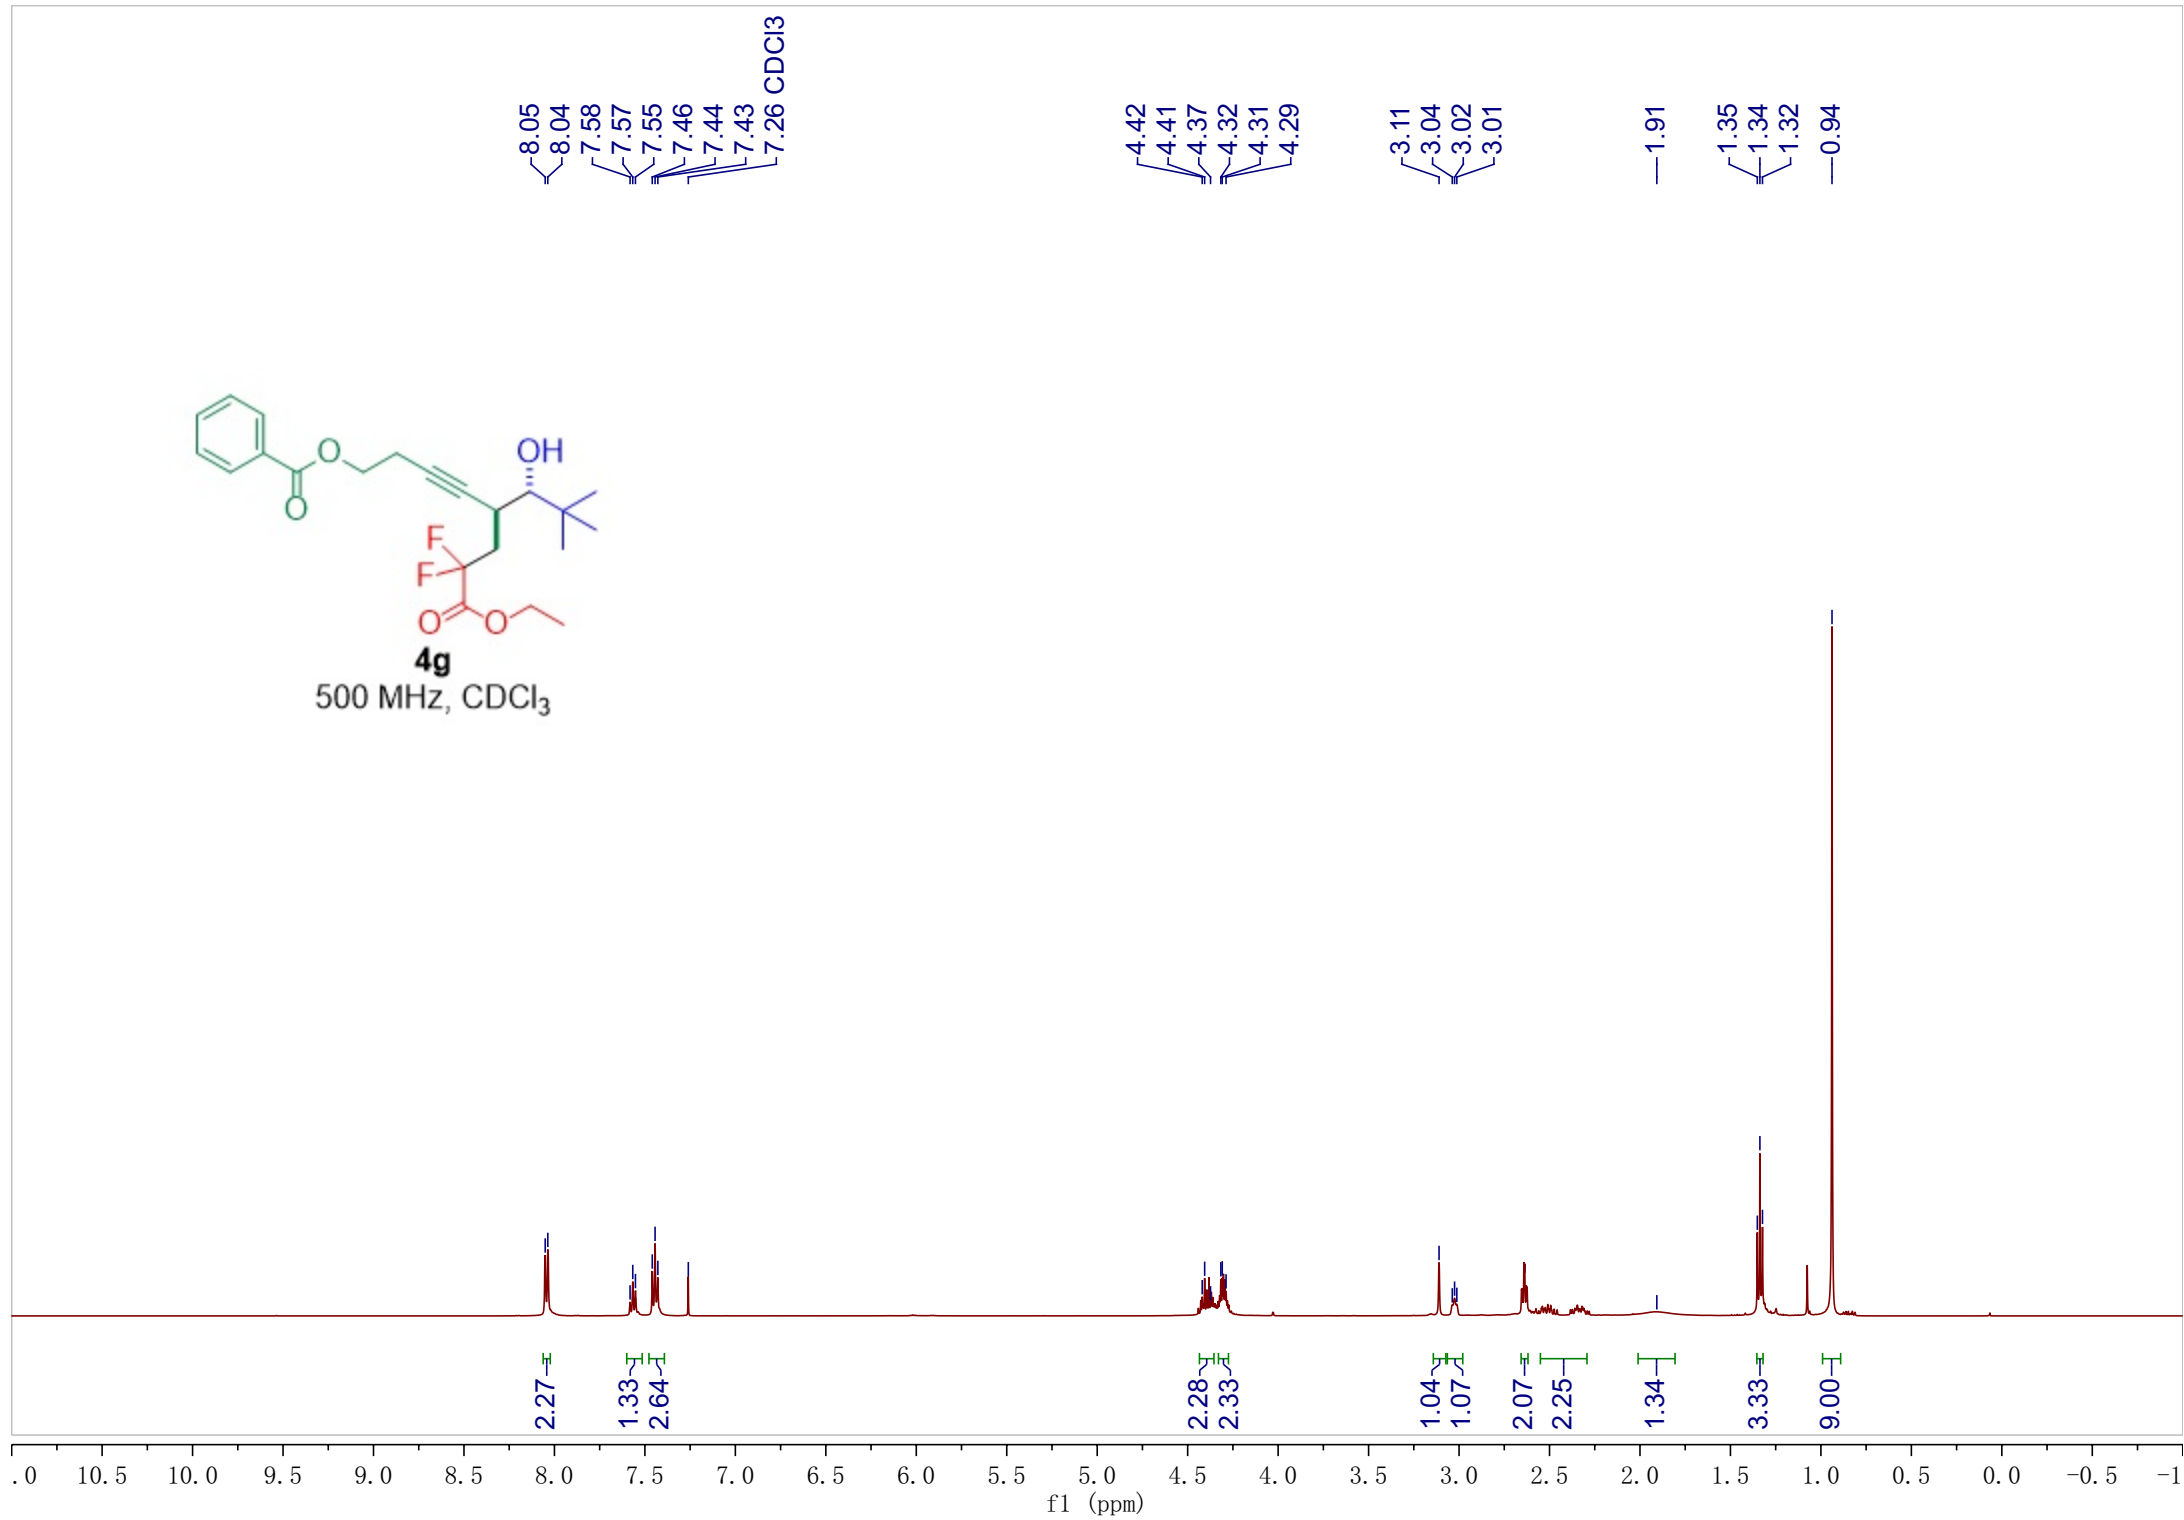

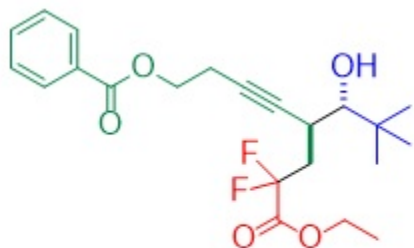

**4g**  
126 MHz, CDCl<sub>3</sub>

166.38  
164.11  
163.85  
163.59

133.13  
129.77  
129.62  
128.37  
117.48  
115.49  
115.48  
113.49

82.56  
80.38  
79.41  
77.25  
77.00 CDCl<sub>3</sub>  
76.75  
62.87  
62.62  
62.34

39.89  
39.71  
39.53  
36.04

28.07  
28.04  
26.80  
— 13.90

A (t)  
163.85  
H

B (dd)  
115.48  
H

D (t)  
39.71  
H

C (m)  
28.07  
H

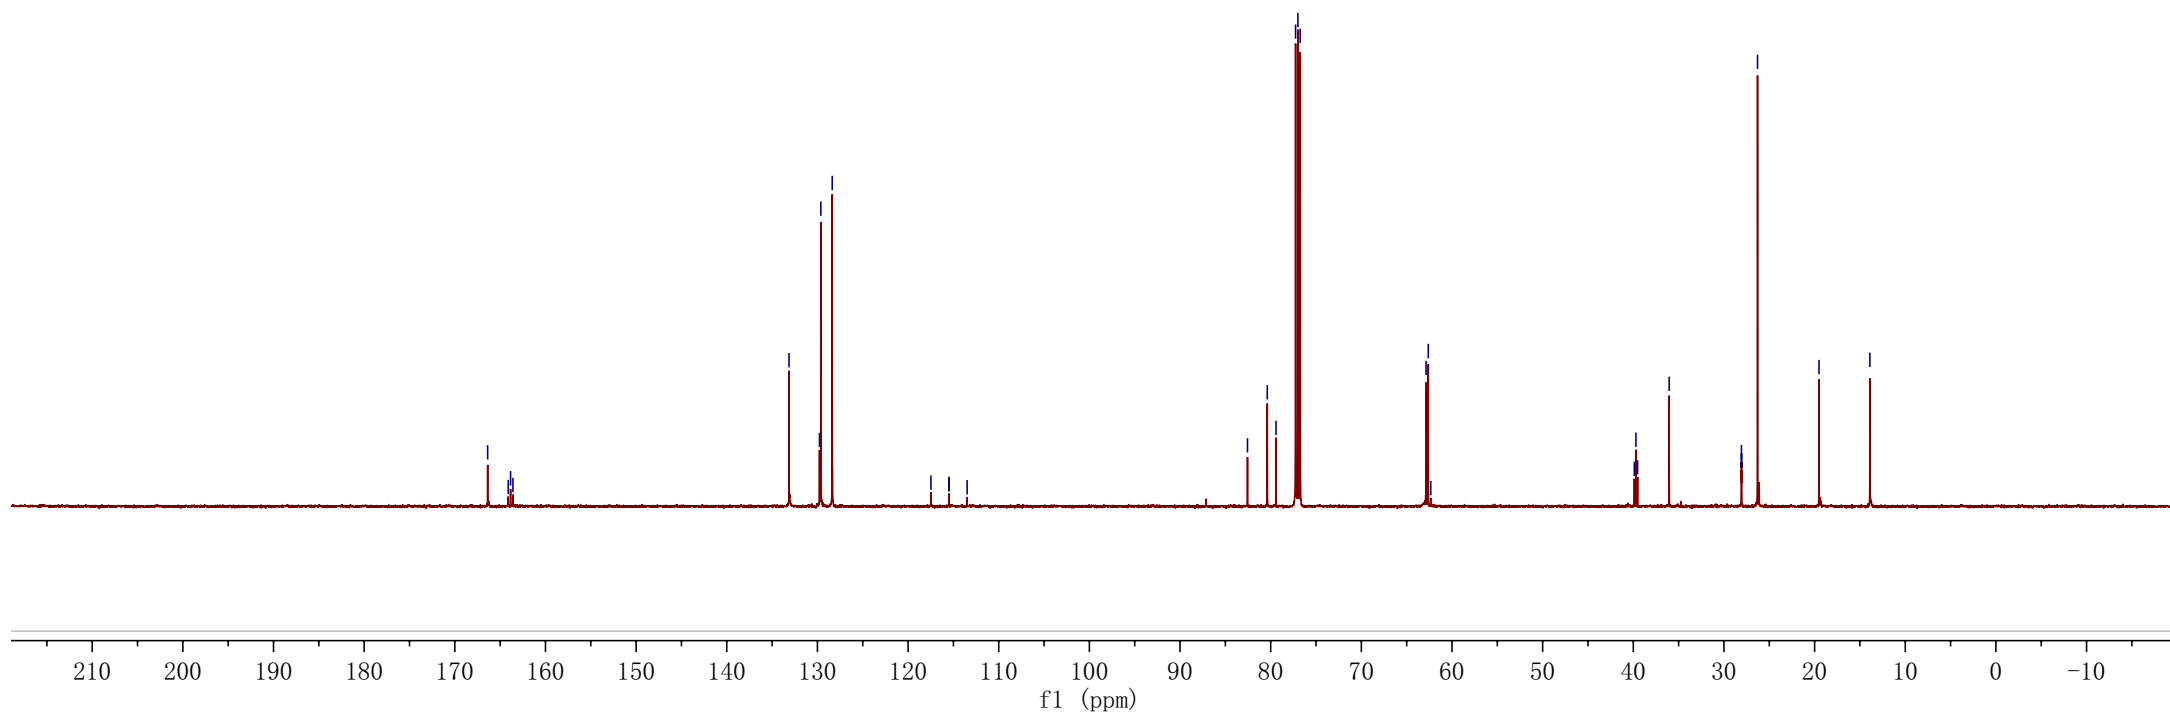

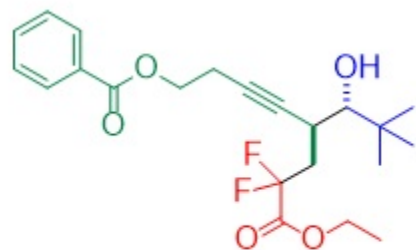

**4g**

471 MHz, CDCl<sub>3</sub>

102.66  
102.69  
102.73

103.22  
103.25  
103.29

106.17  
106.21  
106.25

106.73  
106.77  
106.81

-99.5 -100.5 -101.5 -102.5 -103.5 -104.5 -105.5 -106.5 -107.5 -108.5 -109.5

f1 (ppm)

1.00

1.02

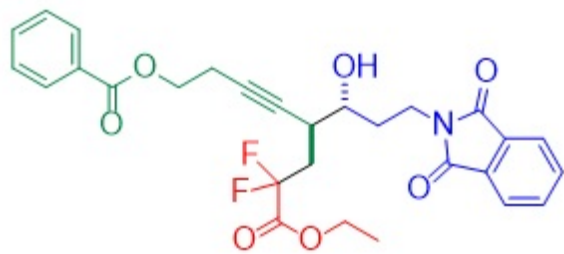

**4h**  
500 MHz, CDCl<sub>3</sub>

8.03  
8.01  
7.83  
7.82  
7.71  
7.71  
7.70  
7.54  
7.53  
7.51  
7.43  
7.42  
7.40  
7.26 CDCl<sub>3</sub>

4.40  
4.39  
4.38  
4.30  
4.29  
4.27  
4.26  
3.81  
3.80  
3.78  
3.54  
2.84  
2.75  
2.64  
2.63  
2.61  
2.42  
2.36  
1.98  
1.95  
1.85  
1.31  
1.30

2.04  
2.17  
2.17  
1.21  
2.37

2.01  
2.12  
1.96  
1.00

0.94  
1.10  
2.12  
2.08

1.19  
1.16  
3.20

10.5 10.0 9.5 9.0 8.5 8.0 7.5 7.0 6.5 6.0 5.5 5.0 4.5 4.0 3.5 3.0 2.5 2.0 1.5 1.0 0.5 0.0 -0.5 -1

f1 (ppm)

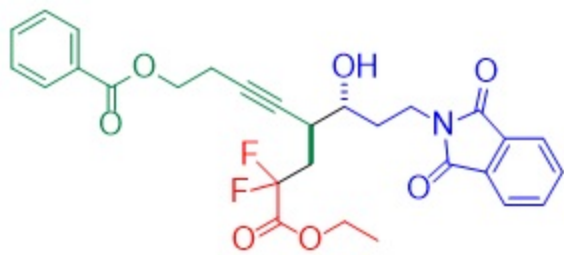

**4h**  
126 MHz, CDCl<sub>3</sub>

168.69  
166.31  
164.06  
163.80  
163.54

134.06  
133.02  
131.88  
129.82  
129.58  
128.32  
123.31  
117.47  
115.48  
115.47  
113.48

80.59  
78.76  
77.25  
77.00 CDCl<sub>3</sub>  
76.75  
69.98  
62.83  
62.69

36.92  
36.74  
36.56  
34.62  
34.02  
32.12  
19.44  
13.85

A (t)  
163.80  
H

B (dd)  
115.47  
H

C (t)  
36.74  
H

D (m)  
32.10  
H

210 200 190 180 170 160 150 140 130 120 110 100 90 80 70 60 50 40 30 20 10 0 -10

f1 (ppm)

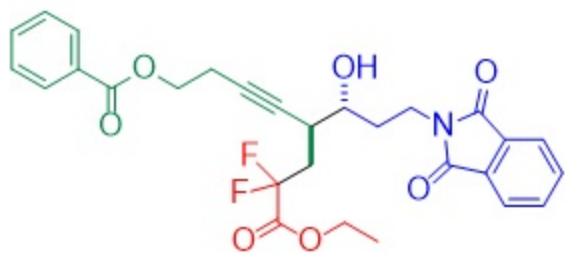

**4h**  
471 MHz, CDCl<sub>3</sub>

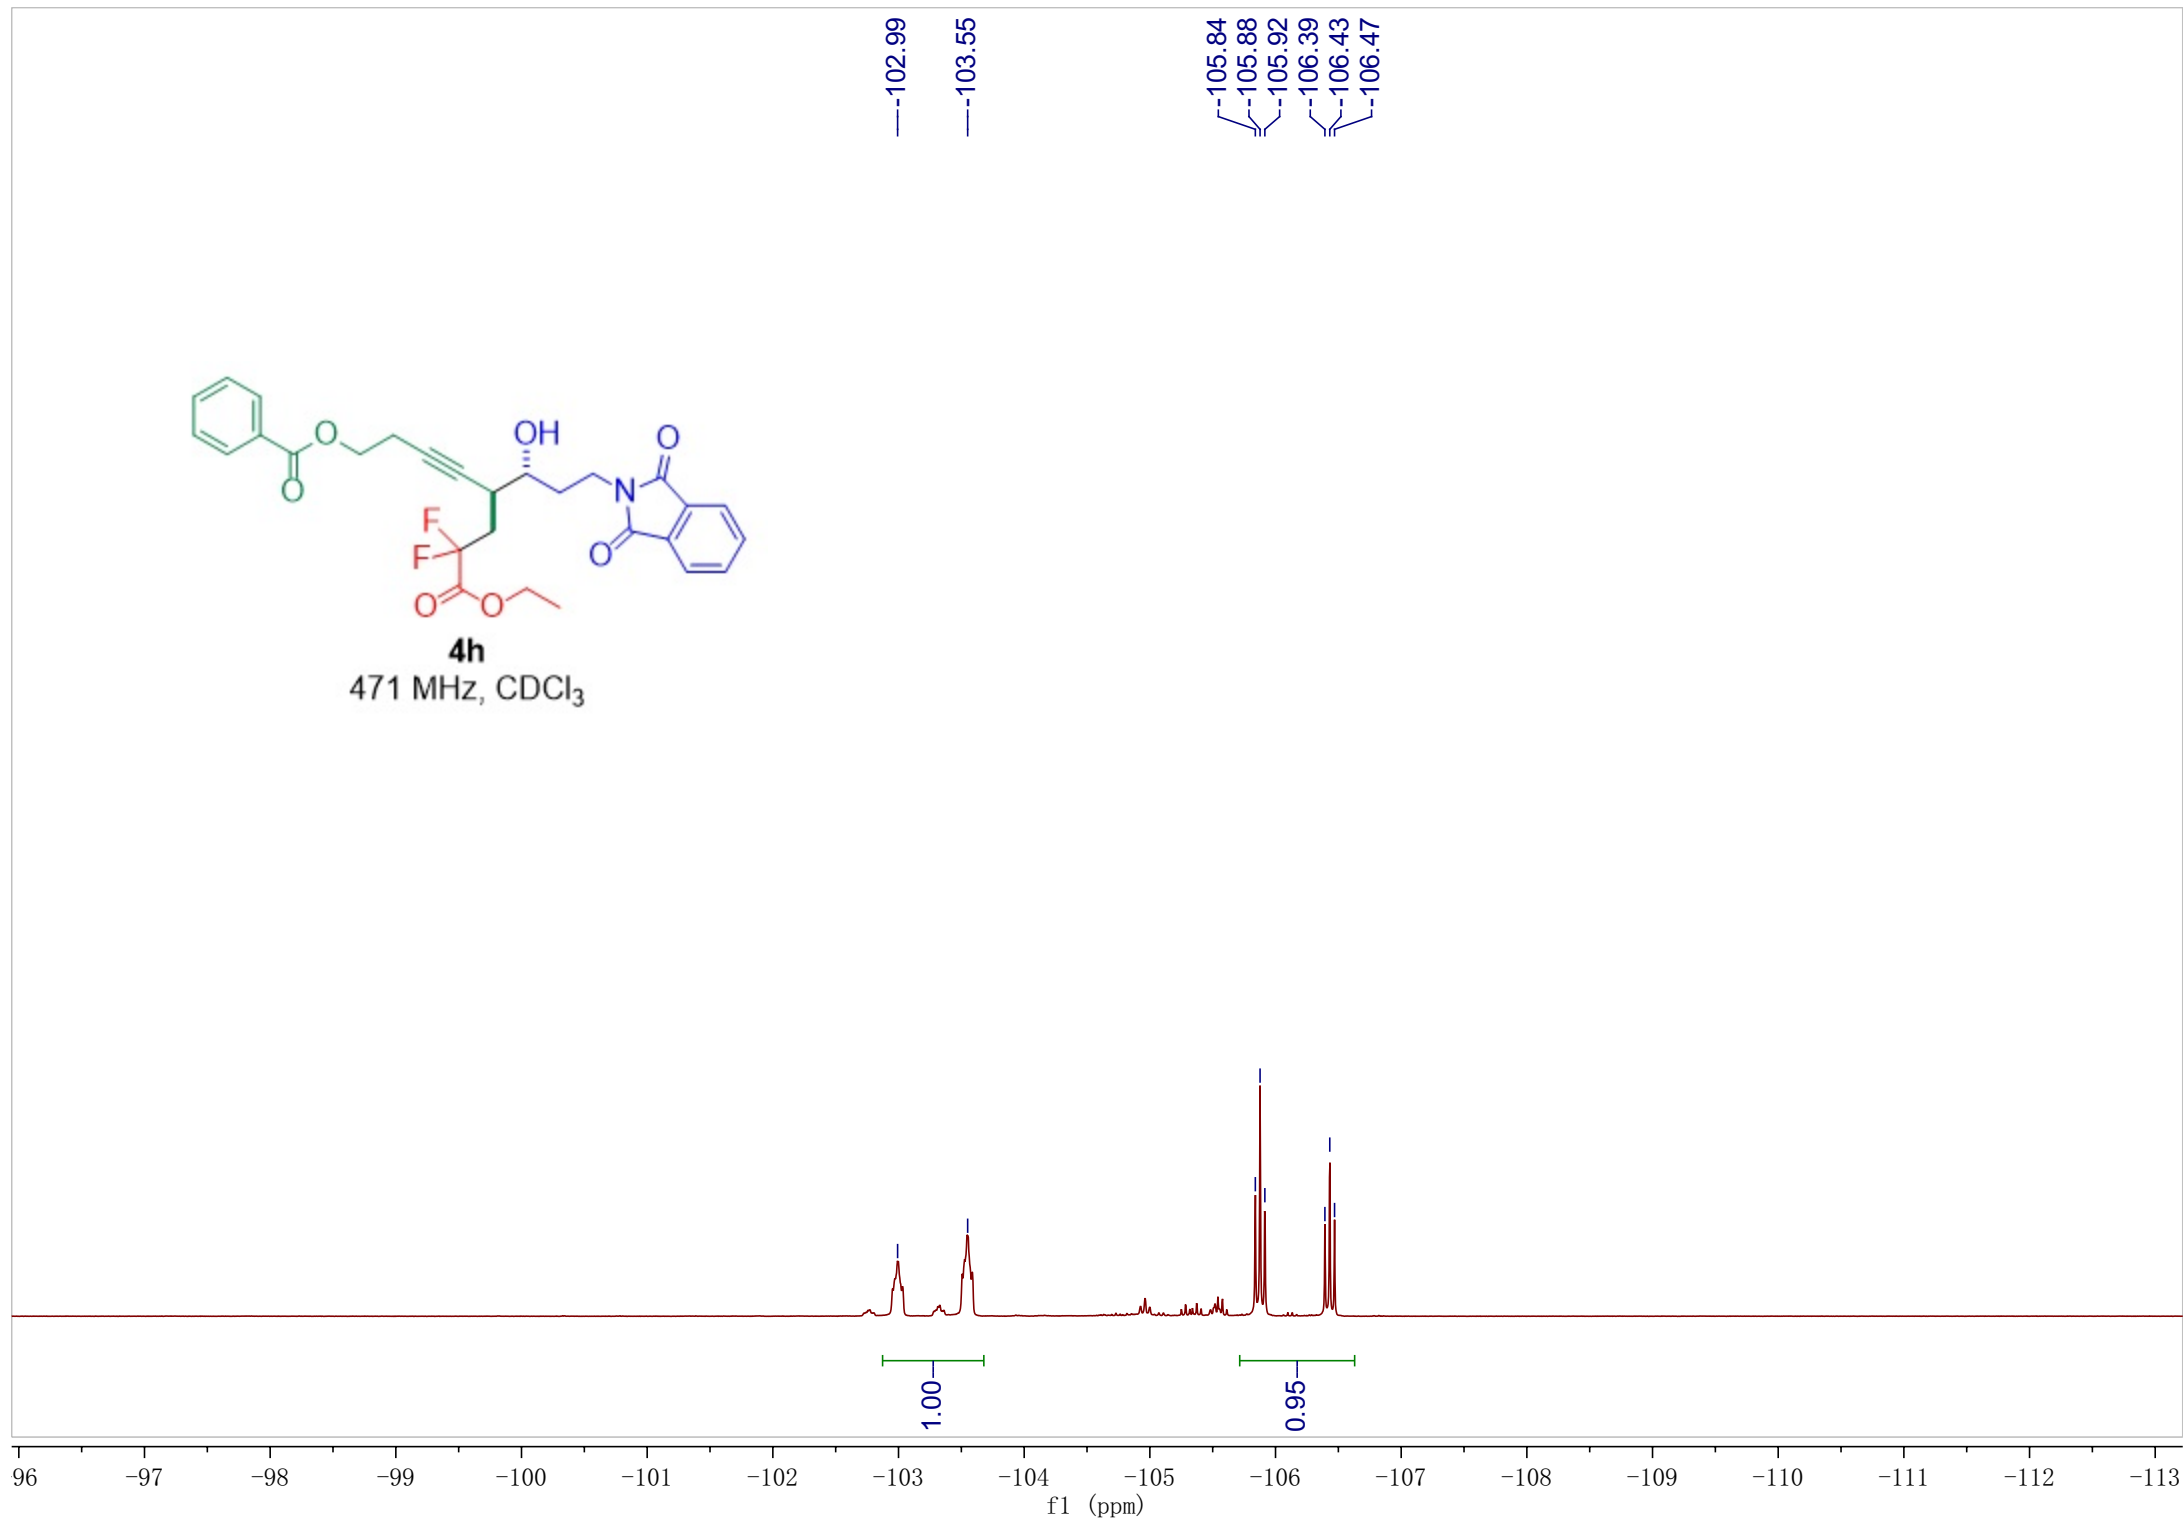

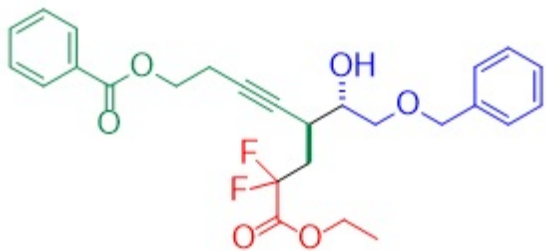

500 MHz, CDCl<sub>3</sub>

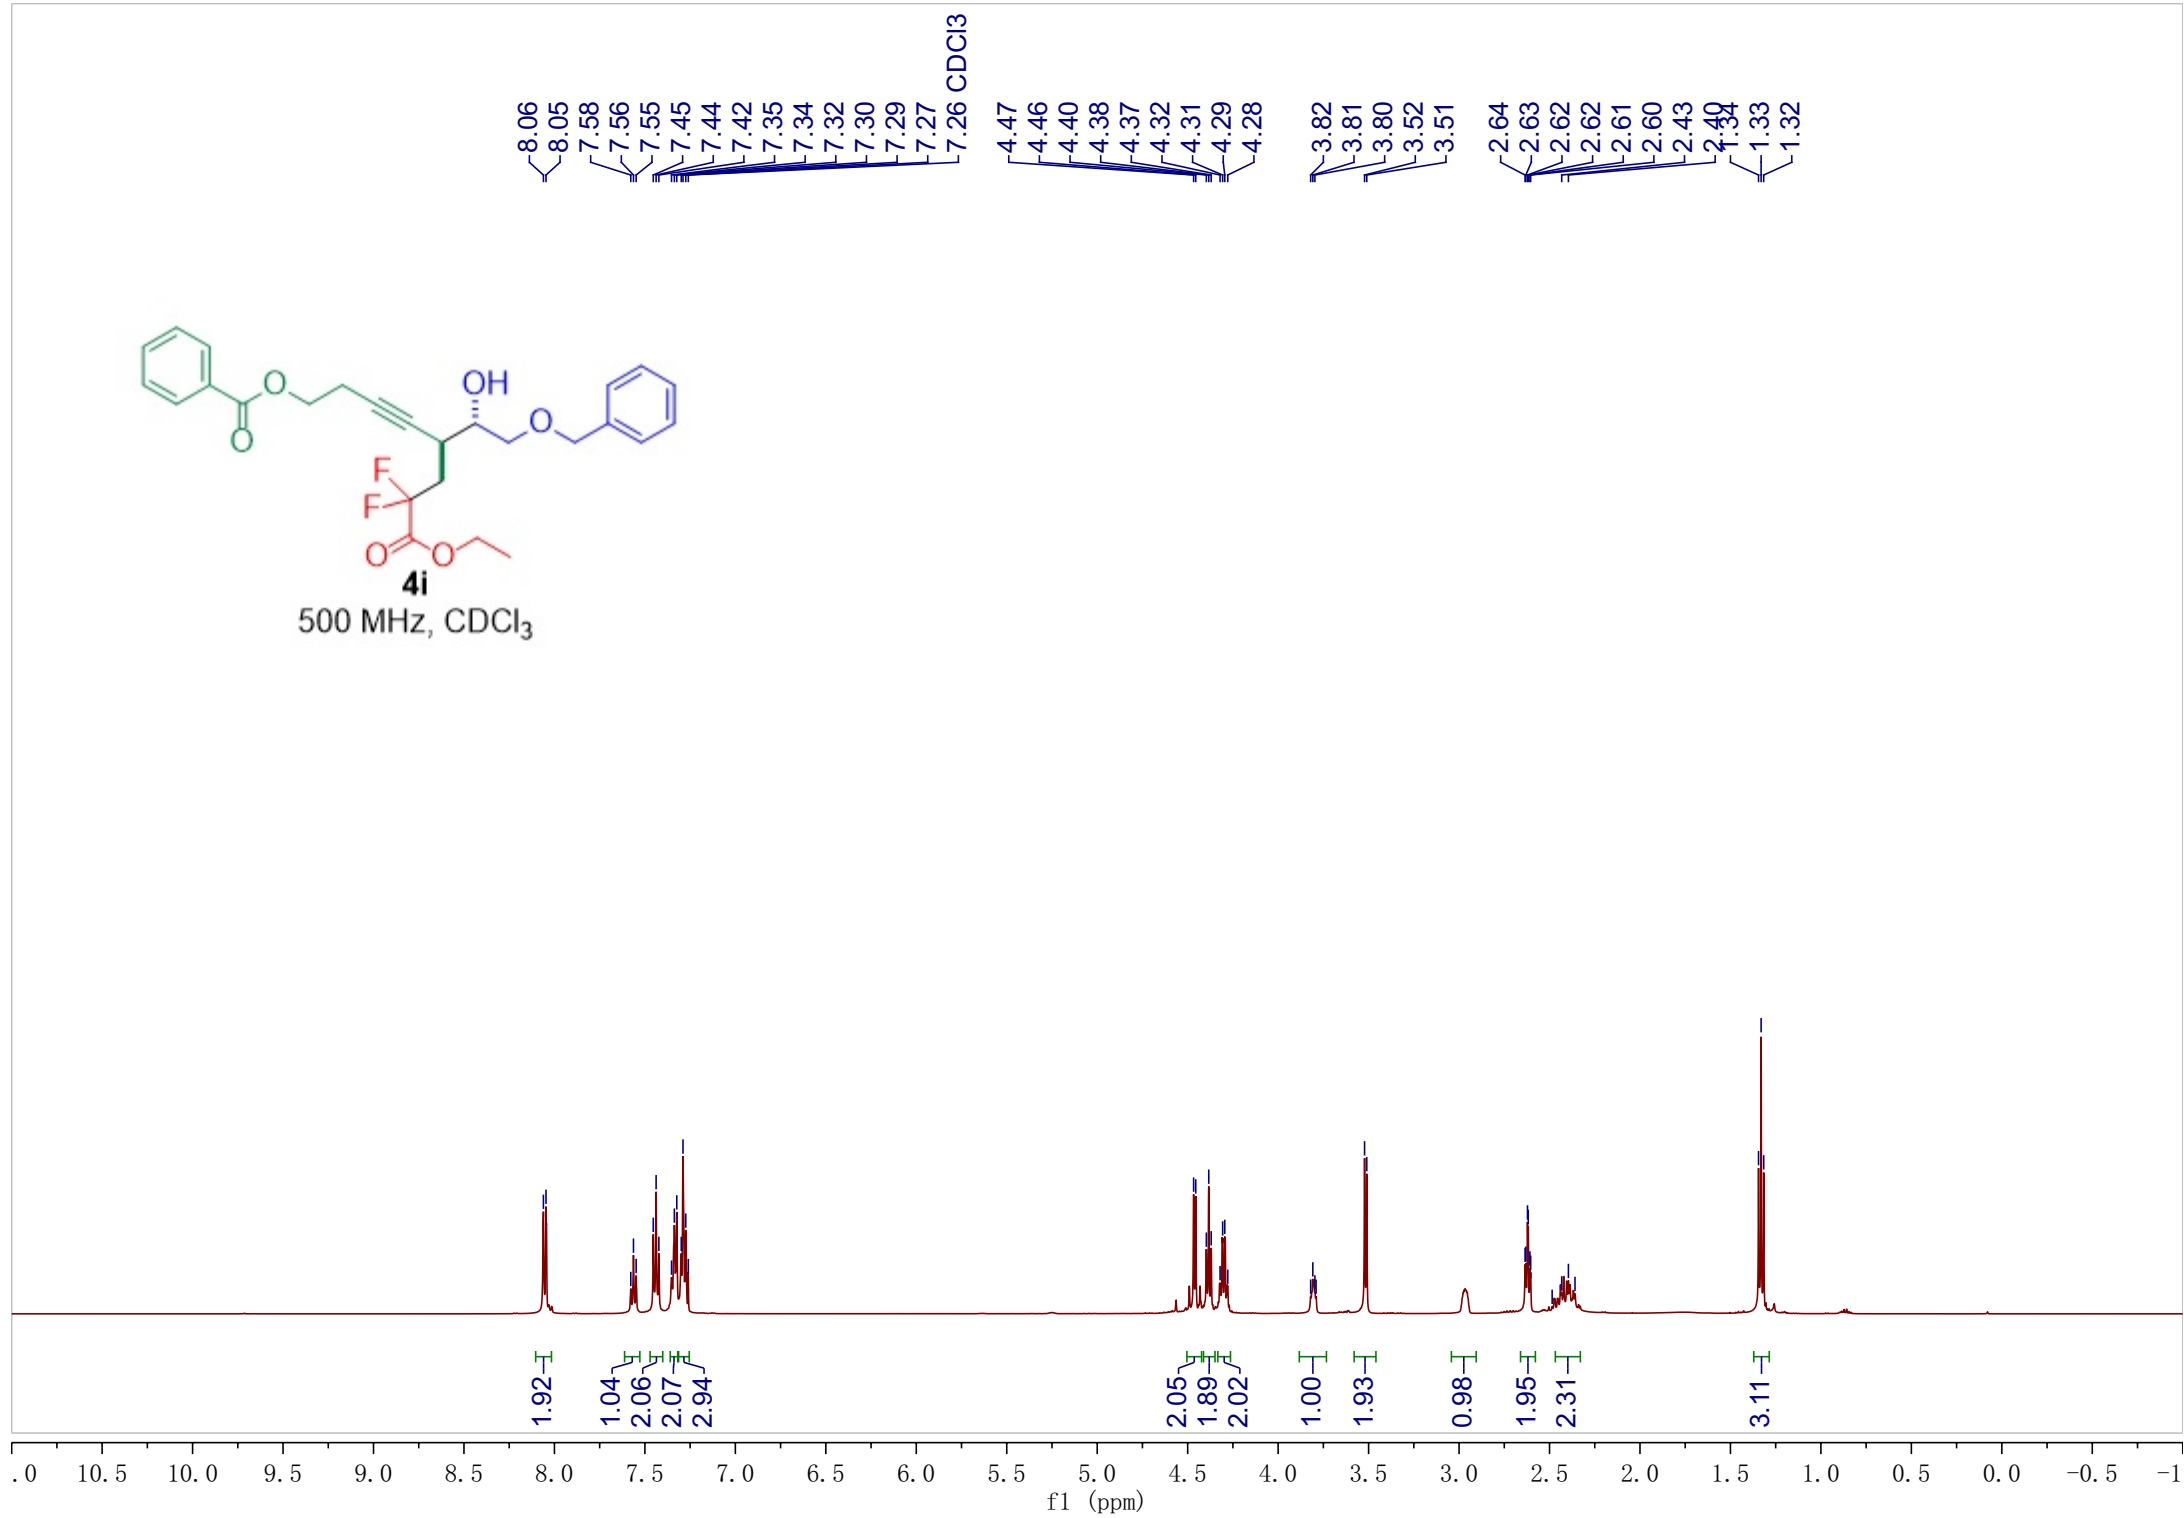



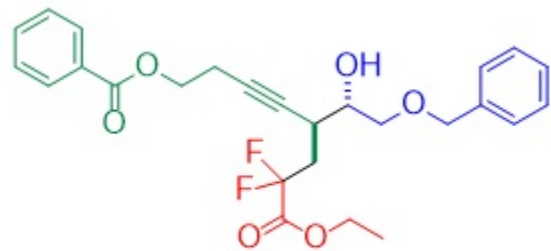

**4i**

126 MHz, CDCl<sub>3</sub>

166.39  
164.08  
163.82  
163.56

137.68  
133.11  
129.83  
129.62  
128.38  
128.32  
127.75  
127.68  
117.46  
115.47  
115.45  
113.46

80.51  
78.53  
77.25  
77.00 CDCl<sub>3</sub>  
76.75  
73.37  
73.29  
71.88  
71.29  
62.84  
62.68

36.58  
36.39  
36.21  
29.17  
29.13  
29.10  
— 19.47  
— 13.86

A (t)  
163.82  
H

B (dd)  
115.46  
H

C (t)  
36.39  
H

D (m)  
29.14  
H

210 200 190 180 170 160 150 140 130 120 110 100 90 80 70 60 50 40 30 20 10 0 -10  
f1 (ppm)

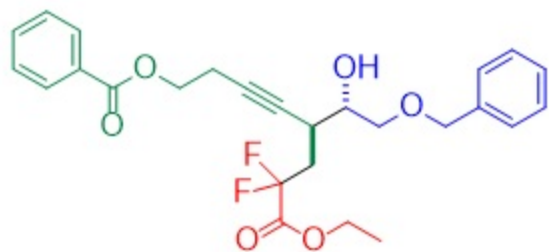

**4i**  
471 MHz, CDCl<sub>3</sub>

102.82  
102.85  
102.89  
103.38  
103.41  
103.44  
105.94  
105.98  
106.01  
106.49  
106.53  
106.57

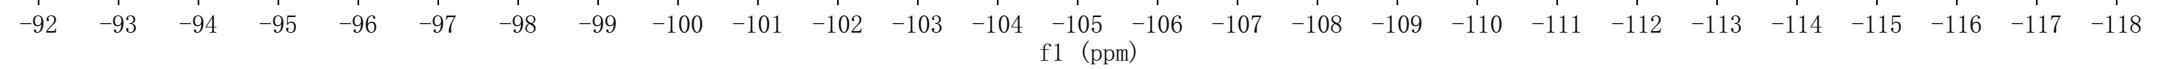

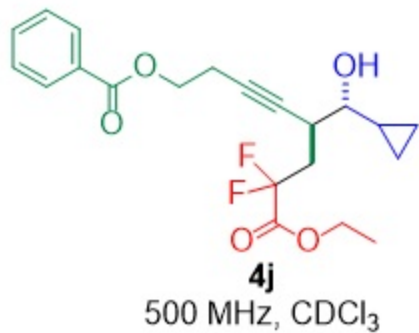

8.05  
 8.04  
 7.58  
 7.56  
 7.55  
 7.45  
 7.44  
 7.42  
 7.26 CDCl<sub>3</sub>

4.44  
 4.43  
 4.41  
 4.33  
 4.32  
 4.30  
 4.29

2.92  
 2.91  
 2.76  
 2.75  
 2.74  
 2.73  
 2.43  
 2.42  
 2.38

1.35  
 1.34  
 1.32  
 1.07  
 1.06  
 1.03  
 0.48  
 0.47  
 0.37  
 0.35  
 0.32  
 0.20

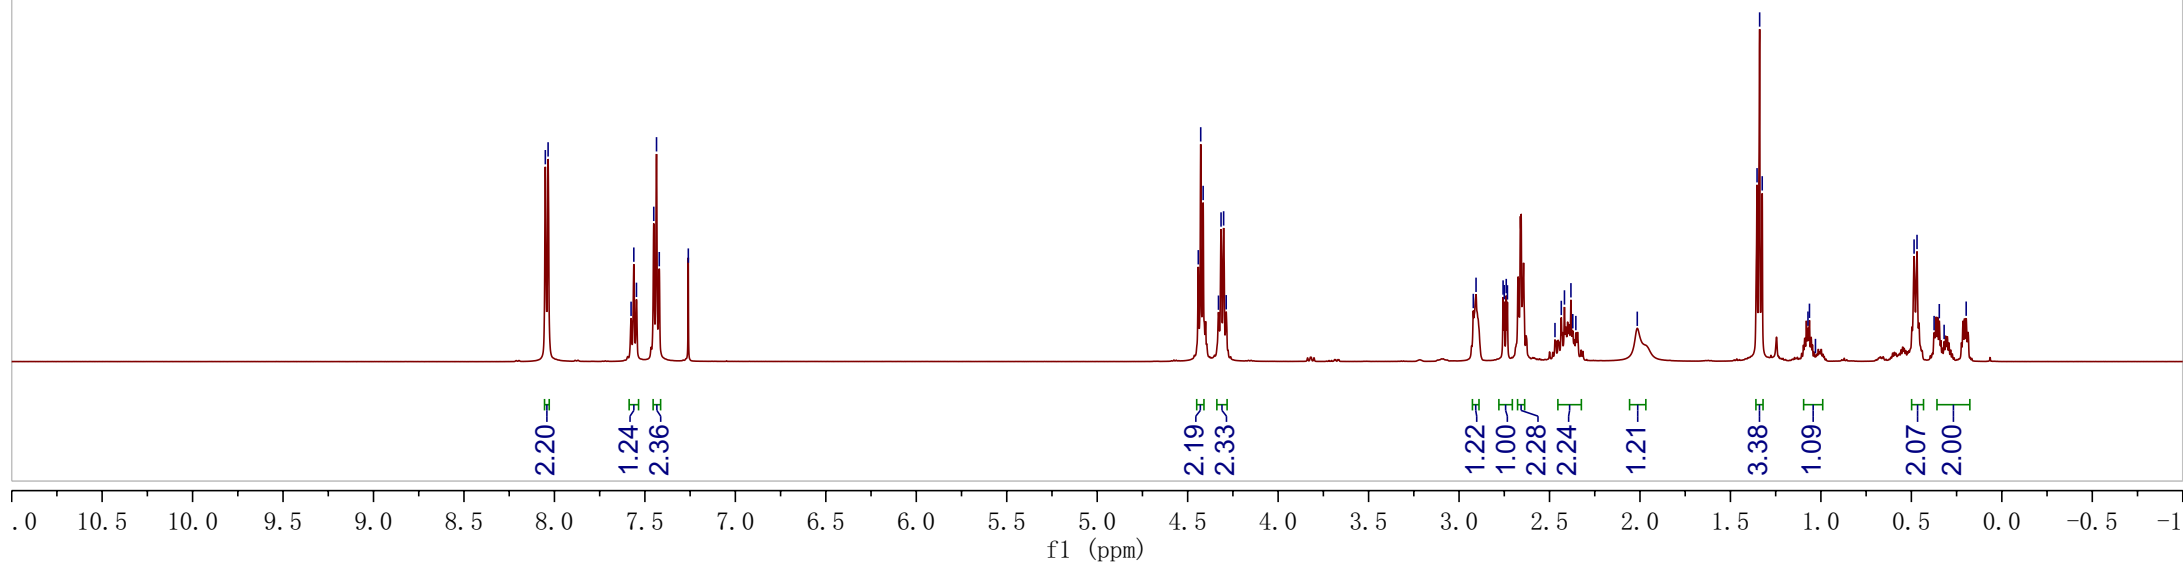

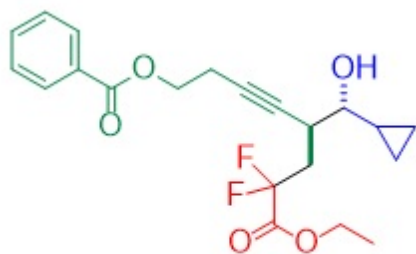

**4j**

126 MHz, CDCl<sub>3</sub>

166.44  
164.15  
163.89  
163.63

133.11  
129.83  
129.61  
128.35  
117.56  
115.57  
115.56  
113.57

80.28  
79.51  
78.01  
77.25  
77.00 CDCl<sub>3</sub>  
76.75  
62.84  
62.73

37.12  
36.93  
36.75  
32.85  
32.82  
32.78  
19.56  
15.80  
13.89  
3.07  
2.89

A (t)  
163.89  
H

B (dd)  
115.56  
H

C (t)  
36.93  
H

D (m)  
32.80  
H

210 200 190 180 170 160 150 140 130 120 110 100 90 80 70 60 50 40 30 20 10 0 -10  
f1 (ppm)

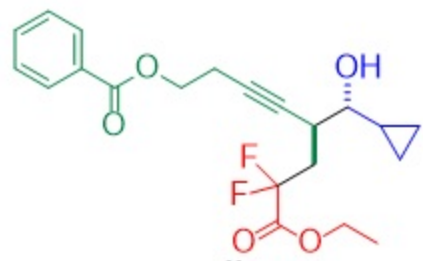

**4j**  
471 MHz, CDCl<sub>3</sub>

102.61  
102.62  
102.67  
103.16  
103.19  
103.21  
103.24  
106.02  
106.06  
106.10  
106.58  
106.62  
106.65

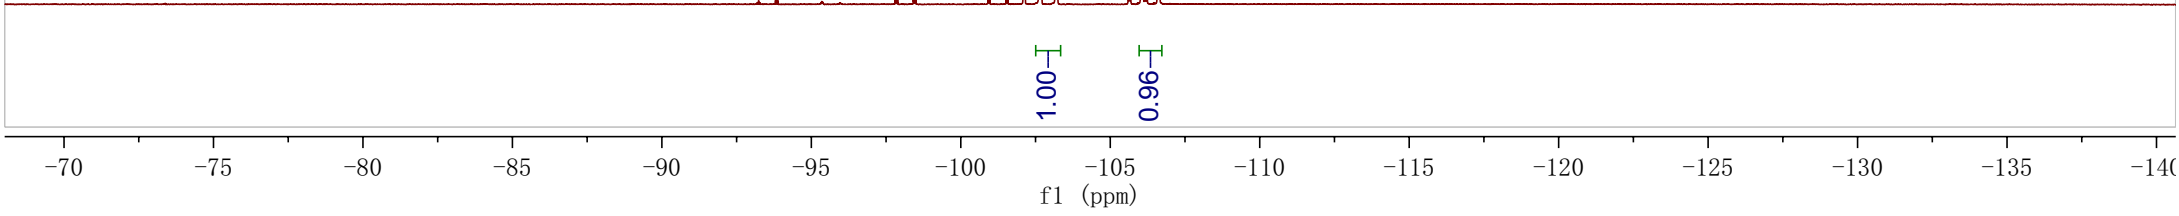

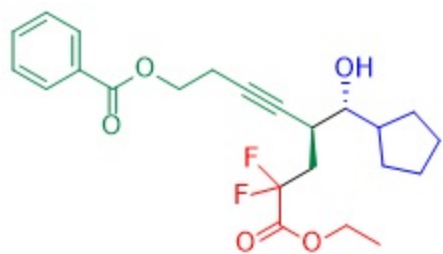

4k

500 MHz, CDCl<sub>3</sub>

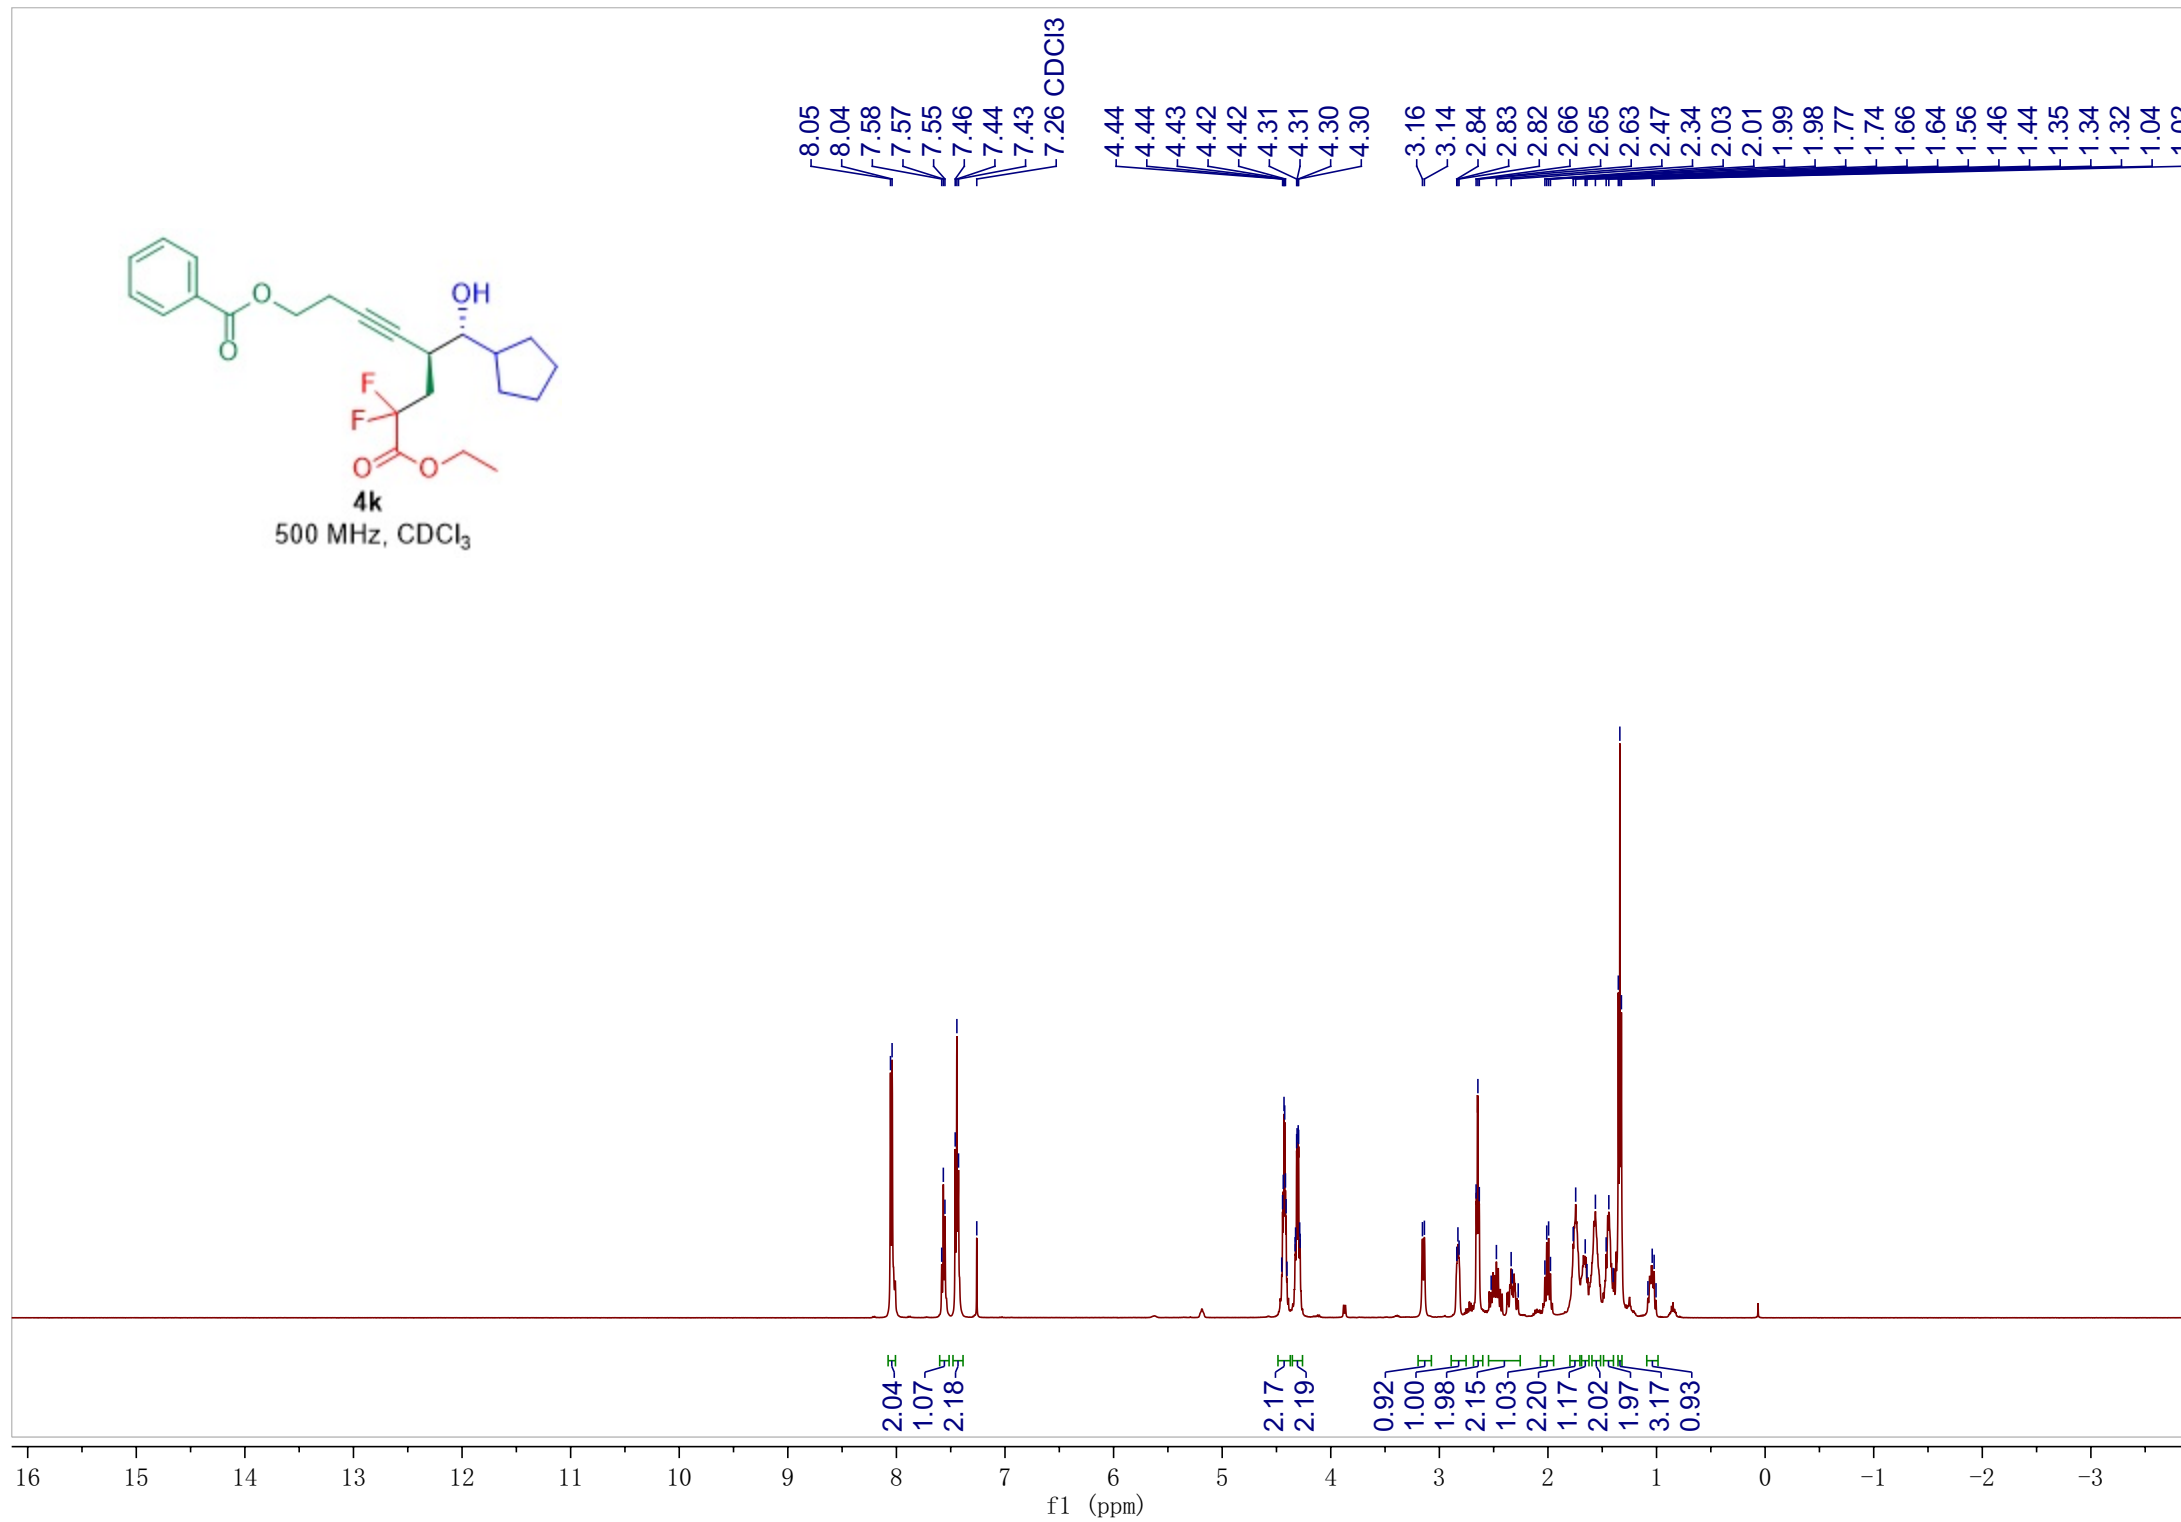

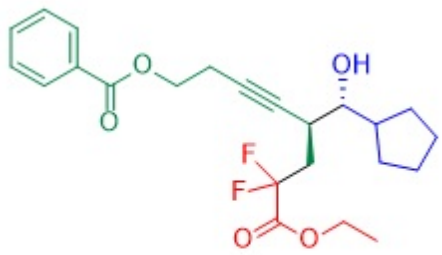

**4k**  
126 MHz, CDCl<sub>3</sub>

166.47  
164.19  
163.93  
163.67

133.14  
129.82  
129.60  
128.39  
117.62  
115.64  
115.62  
113.64

80.54  
78.85  
78.17  
77.25  
77.00 CDCl<sub>3</sub>  
76.75

62.83  
62.75

45.00  
37.86  
37.67  
37.49  
31.37  
31.35  
31.34  
31.32  
29.79  
29.09  
25.41  
25.28  
19.60  
13.90

A (t)  
163.93  
H

B (dd)  
115.63  
H

C (t)  
37.67  
H

D (m)  
31.34  
H

210 200 190 180 170 160 150 140 130 120 110 100 90 80 70 60 50 40 30 20 10 0 -10  
f1 (ppm)

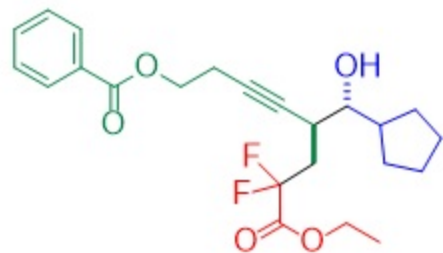

**4k**  
471 MHz, CDCl<sub>3</sub>

102.81  
102.84  
102.88  
103.37  
103.40  
103.43

105.89  
105.93  
105.97  
106.45  
106.49  
106.53

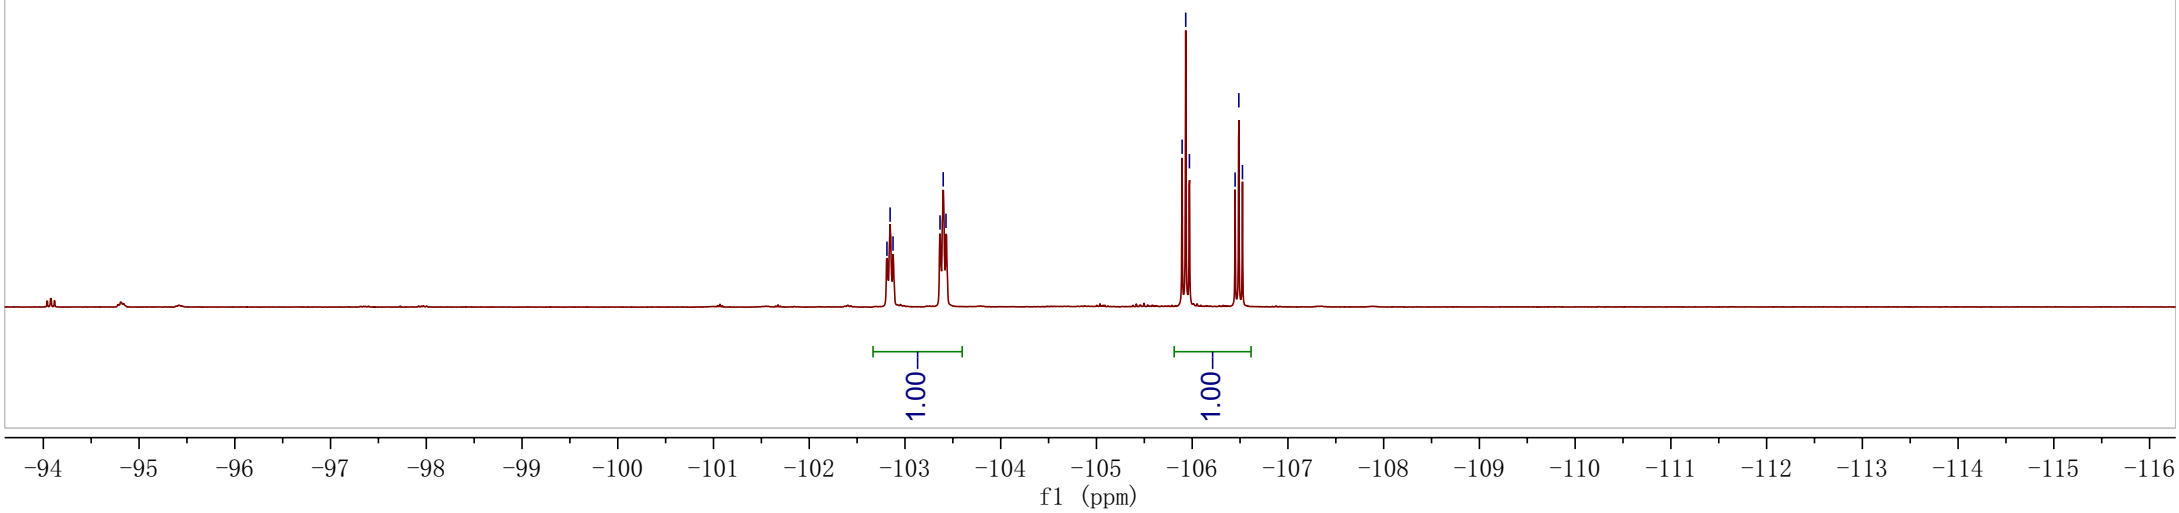



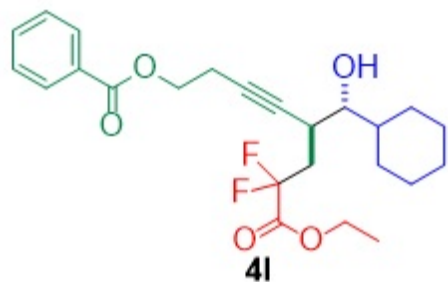

500 MHz, CDCl<sub>3</sub>

8.06  
8.04  
7.58  
7.56  
7.55  
7.46  
7.44  
7.43  
7.26 CDCl<sub>3</sub>

4.43  
4.42  
4.41  
4.32  
4.31  
4.29  
4.28

3.09  
3.08  
2.93  
1.98  
1.95  
1.68  
1.66  
1.58  
1.43  
1.41  
1.35  
1.33  
1.32  
1.17  
1.12  
1.08  
1.04  
0.94  
0.92  
0.89  
0.84

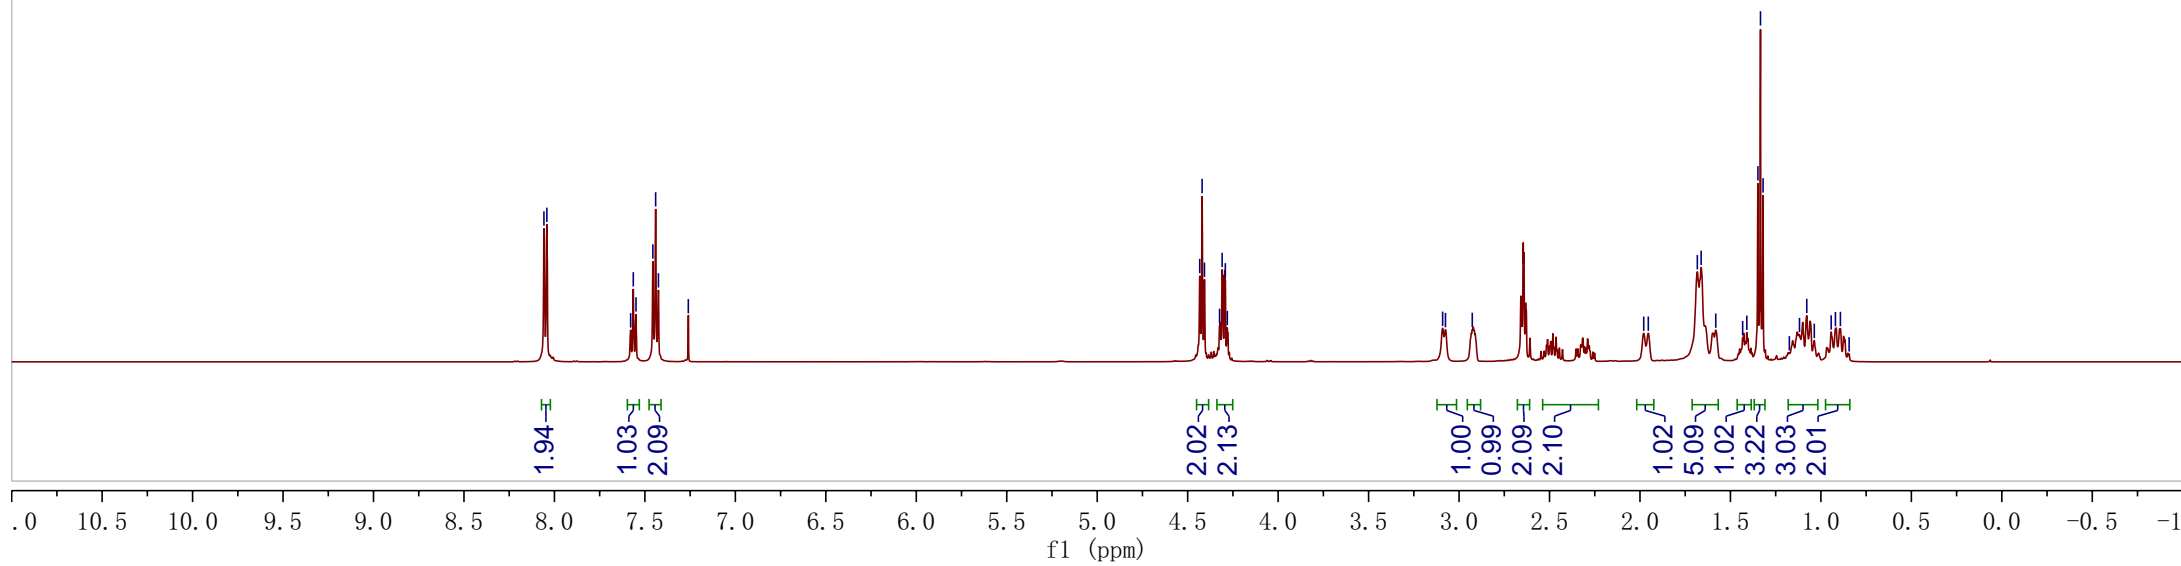

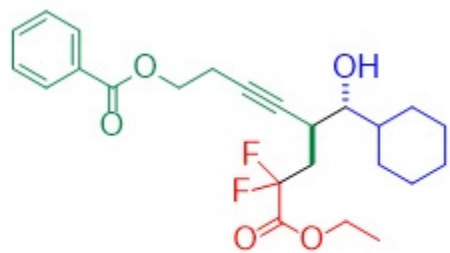

**4I**

126 MHz, CDCl<sub>3</sub>

175.85  
166.47  
164.18  
163.92  
163.66

133.14  
129.80  
129.61  
128.39  
117.65  
115.66  
115.65  
113.66

80.59  
78.76  
77.81  
77.25  
77.00 CDCl<sub>3</sub>  
76.75  
62.82  
62.79

42.05  
37.91  
37.73  
37.55  
29.49  
29.47  
29.45  
29.43  
29.21  
28.99  
26.14  
25.79  
25.58  
19.58  
13.89

E (t)  
163.92  
H

B (dd)  
115.66  
H

C (t)  
37.73  
H

D (m)  
29.46  
H

210 200 190 180 170 160 150 140 130 120 110 100 90 80 70 60 50 40 30 20 10 0 -10  
f1 (ppm)

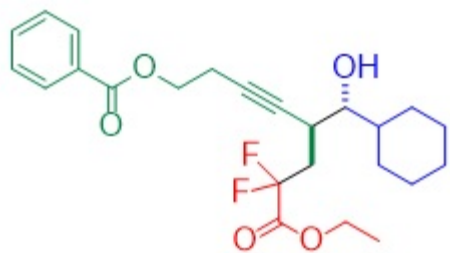

**4I**  
471 MHz, CDCl<sub>3</sub>

102.68  
102.70  
102.74  
103.23  
103.26  
103.27  
103.29

106.04  
106.08  
106.12  
106.60  
106.63  
106.67

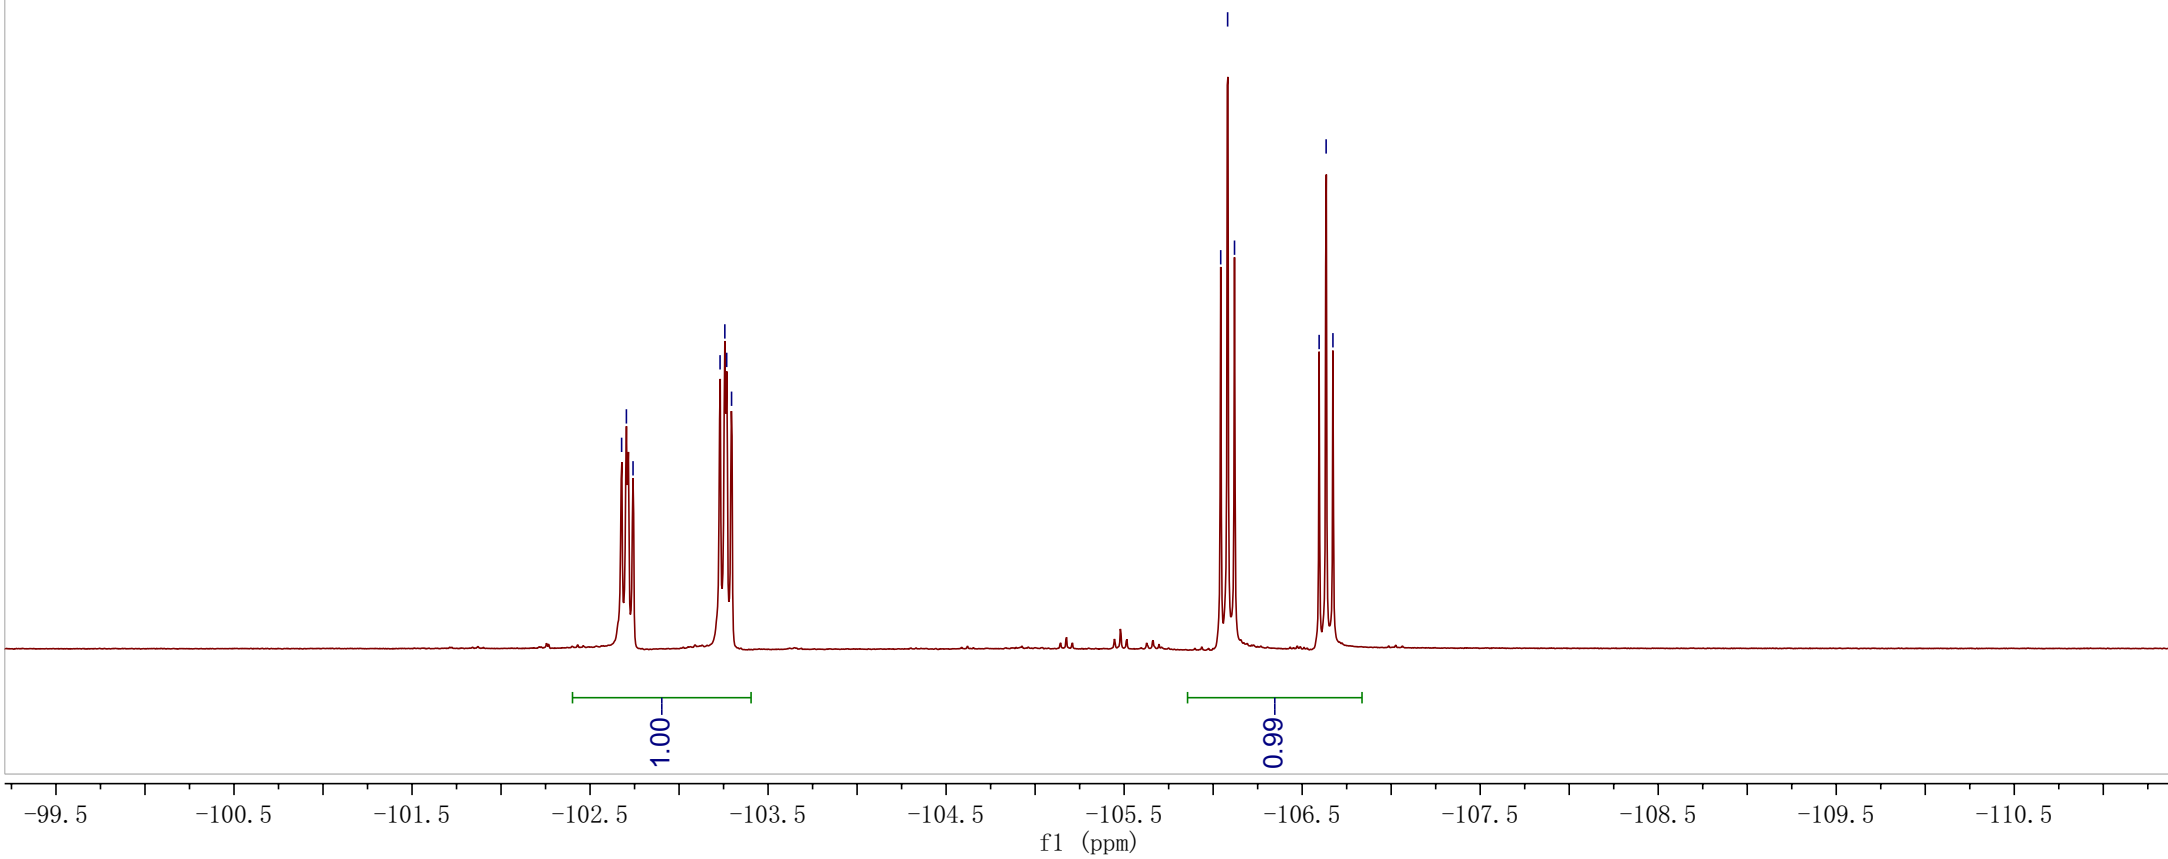

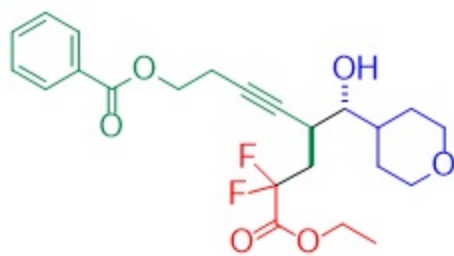

**4m**

500 MHz, CDCl<sub>3</sub>

8.05  
8.03  
7.58  
7.57  
7.55  
7.46  
7.44  
7.43  
7.26 CDCl<sub>3</sub>

4.49  
4.45  
4.42  
4.39  
4.32  
4.30  
4.29  
4.27  
3.90  
3.87

3.21  
3.21  
3.19  
3.12  
3.09  
2.87  
2.66  
2.64  
2.63  
1.88  
1.82  
1.80  
1.64  
1.63  
1.49  
1.46  
1.34  
1.33  
1.31  
1.27  
1.24  
1.20  
1.19

2.00

1.08  
2.12

2.11  
2.12

2.03

1.13  
2.01  
1.00  
2.08  
2.16

2.29  
1.03  
1.07  
3.04  
2.14

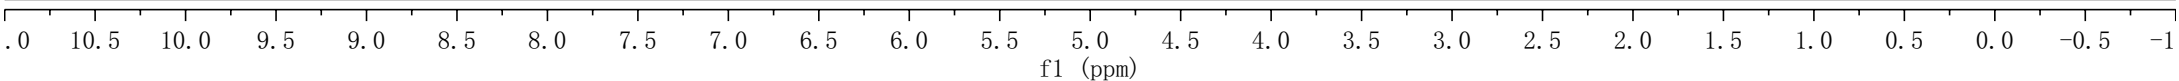

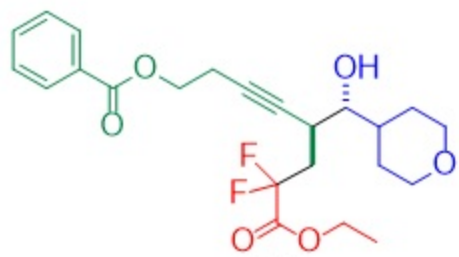

**4m**  
126 MHz, CDCl<sub>3</sub>

166.52  
164.07  
163.82  
163.56

133.25  
129.71  
129.58  
128.43  
117.51  
115.52  
115.51  
113.52

81.00  
78.26  
77.32  
77.25  
77.00 CDCl<sub>3</sub>  
76.75  
67.59  
67.15  
62.87  
62.66

39.47  
37.73  
37.54  
37.36

29.50  
29.08  
29.04  
13.87

A (t)  
163.82  
H

B (dd)  
115.51  
H

C (t)  
37.54  
H

D (m)  
29.08  
H

210 200 190 180 170 160 150 140 130 120 110 100 90 80 70 60 50 40 30 20 10 0 -10  
f1 (ppm)

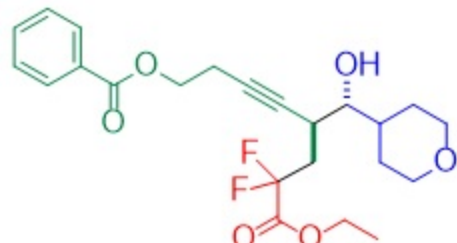

**4m**  
471 MHz, CDCl<sub>3</sub>

102.82  
102.86  
102.89  
103.38  
103.42  
103.44

106.08  
106.11  
106.15  
106.63  
106.67  
106.71

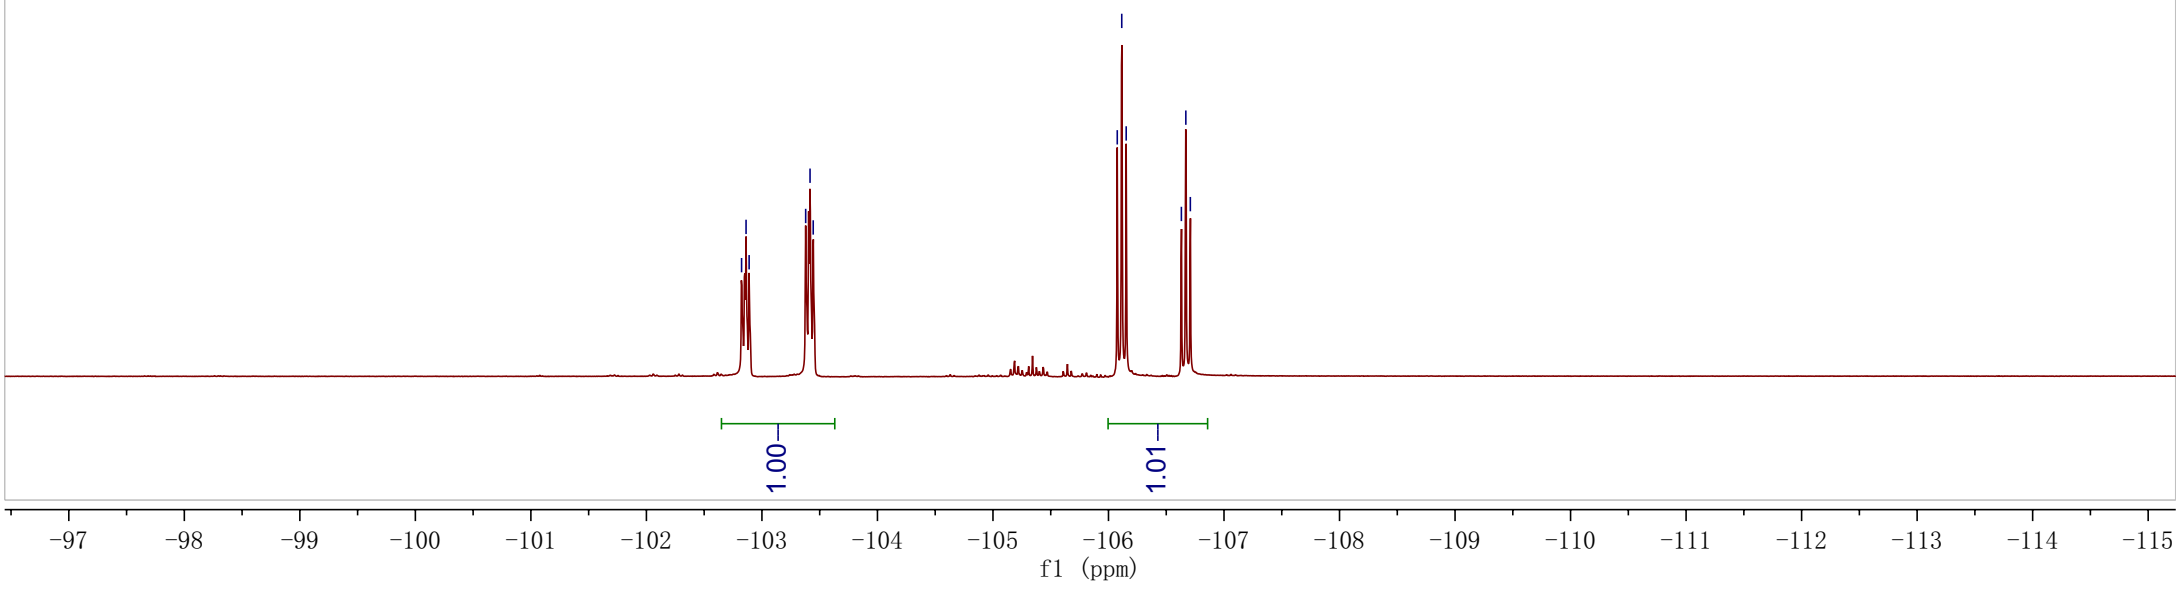

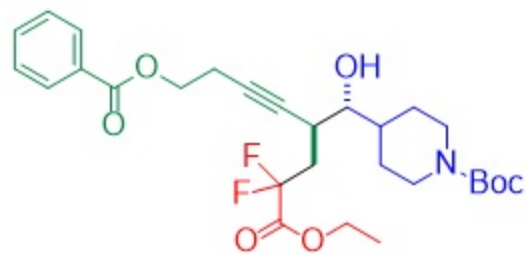

**4n**  
500 MHz, CDCl<sub>3</sub>

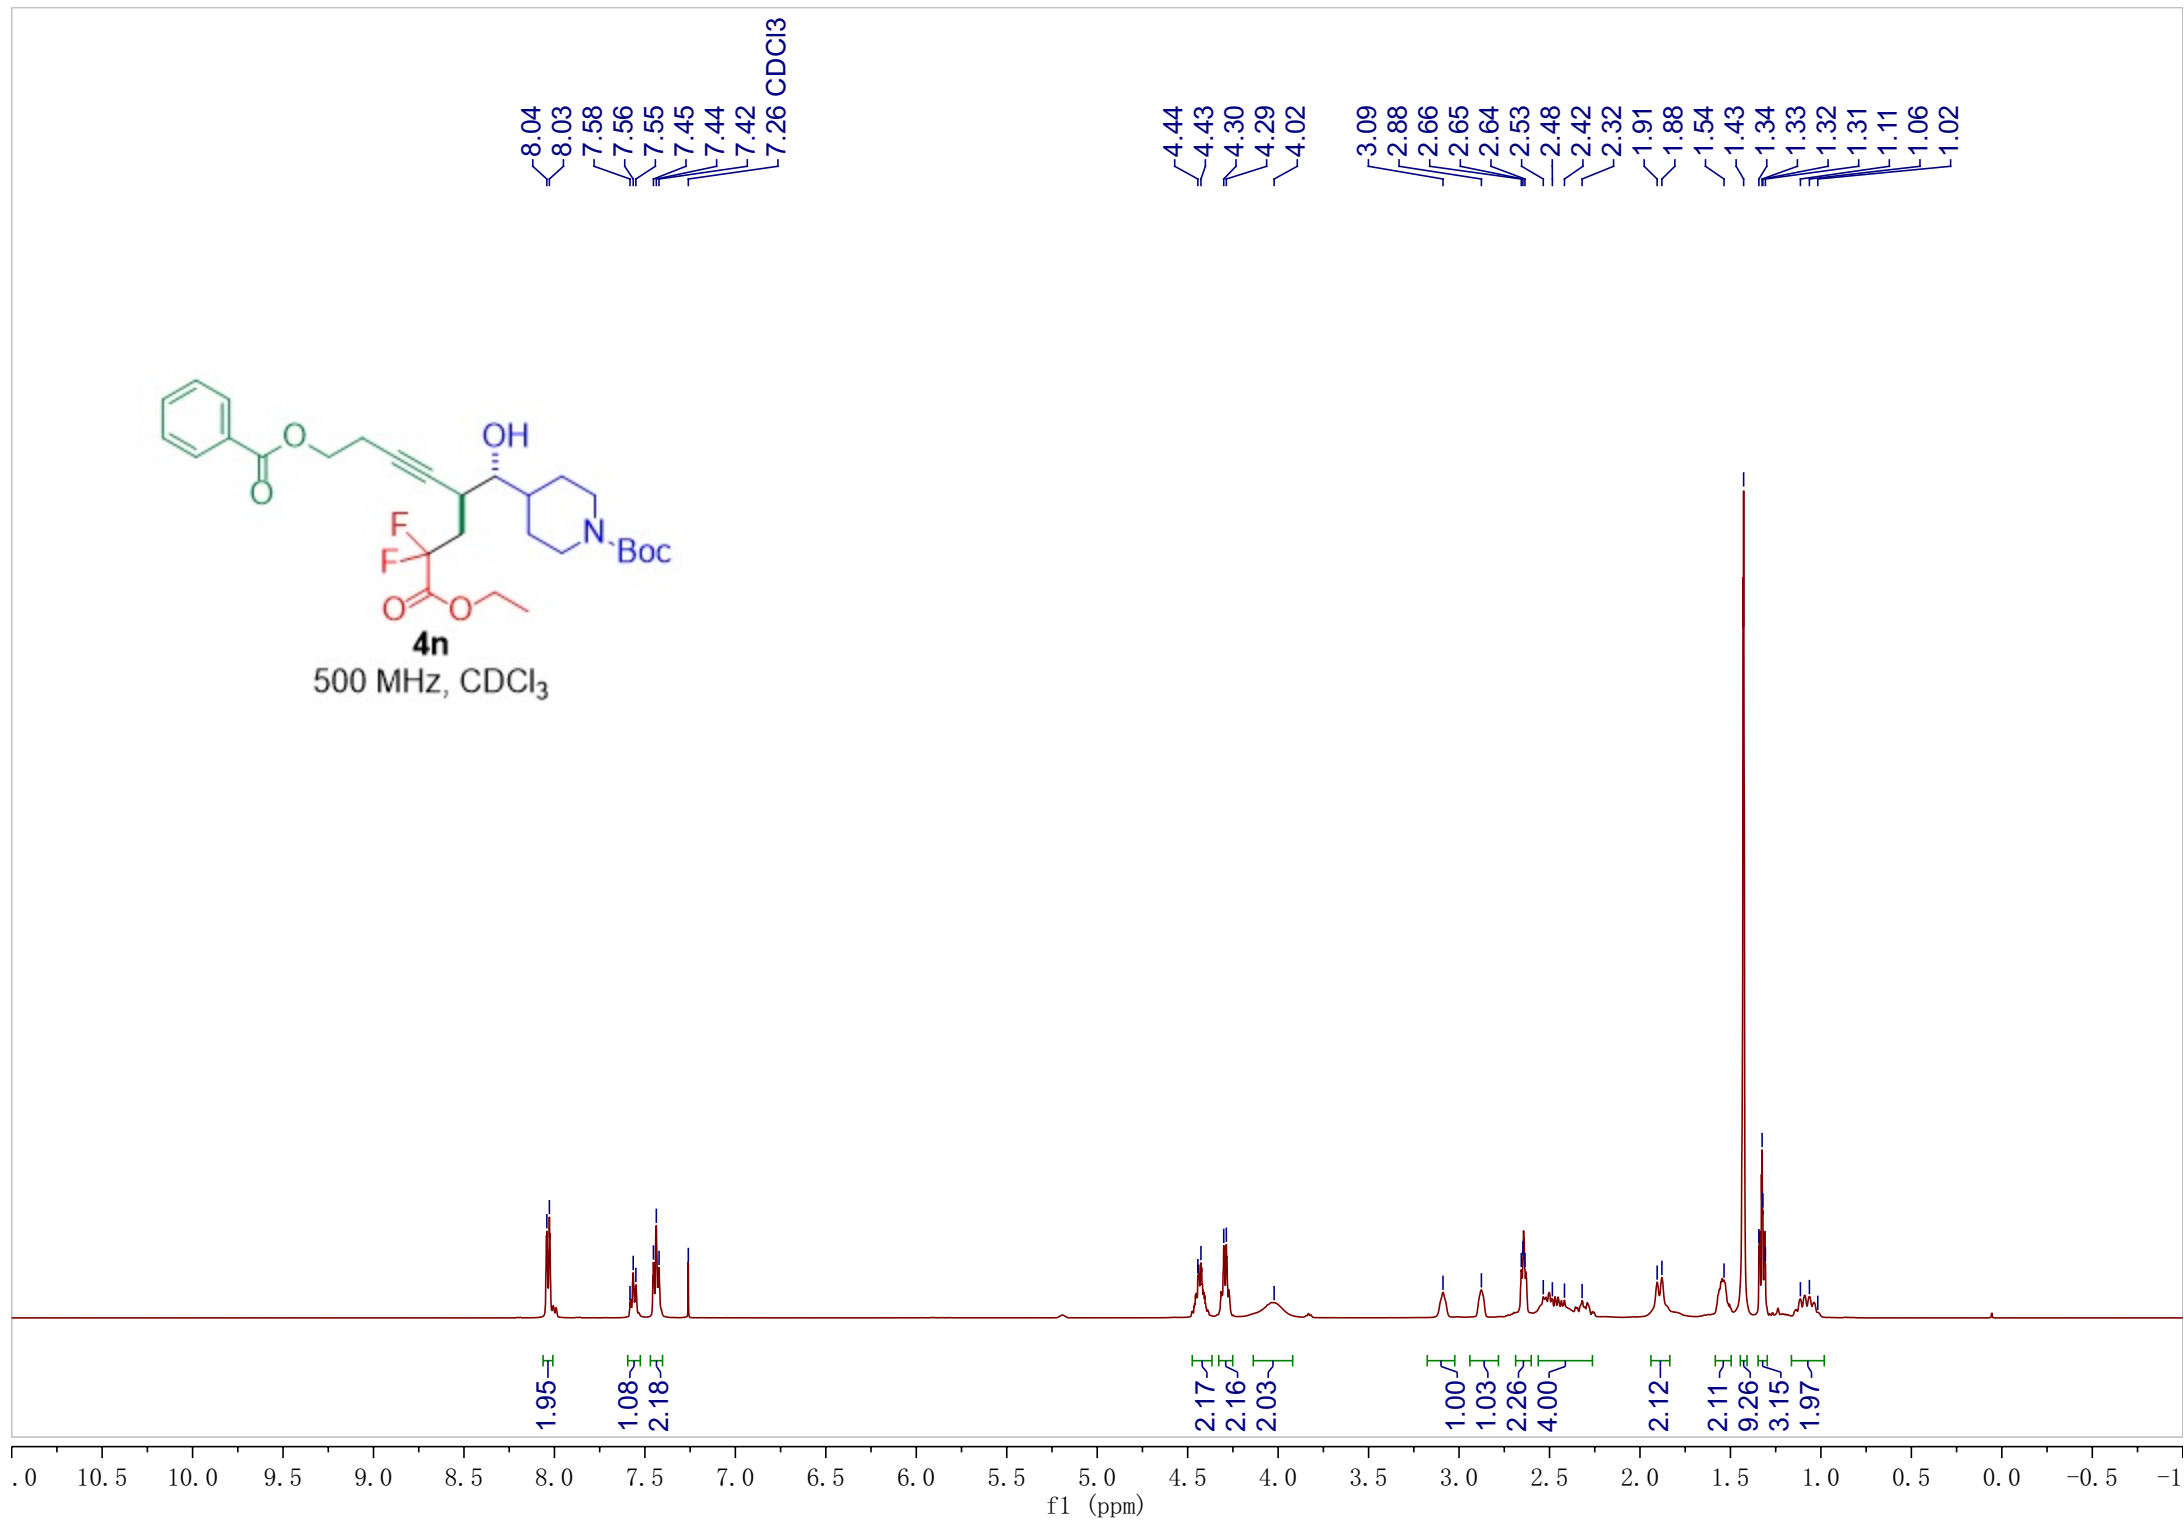

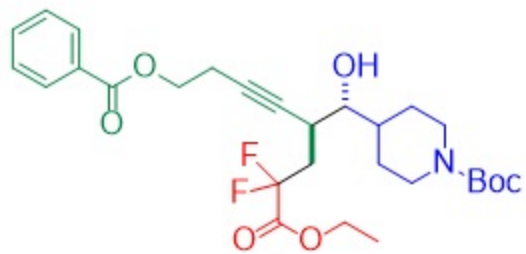

**4n**  
126 MHz, CDCl<sub>3</sub>

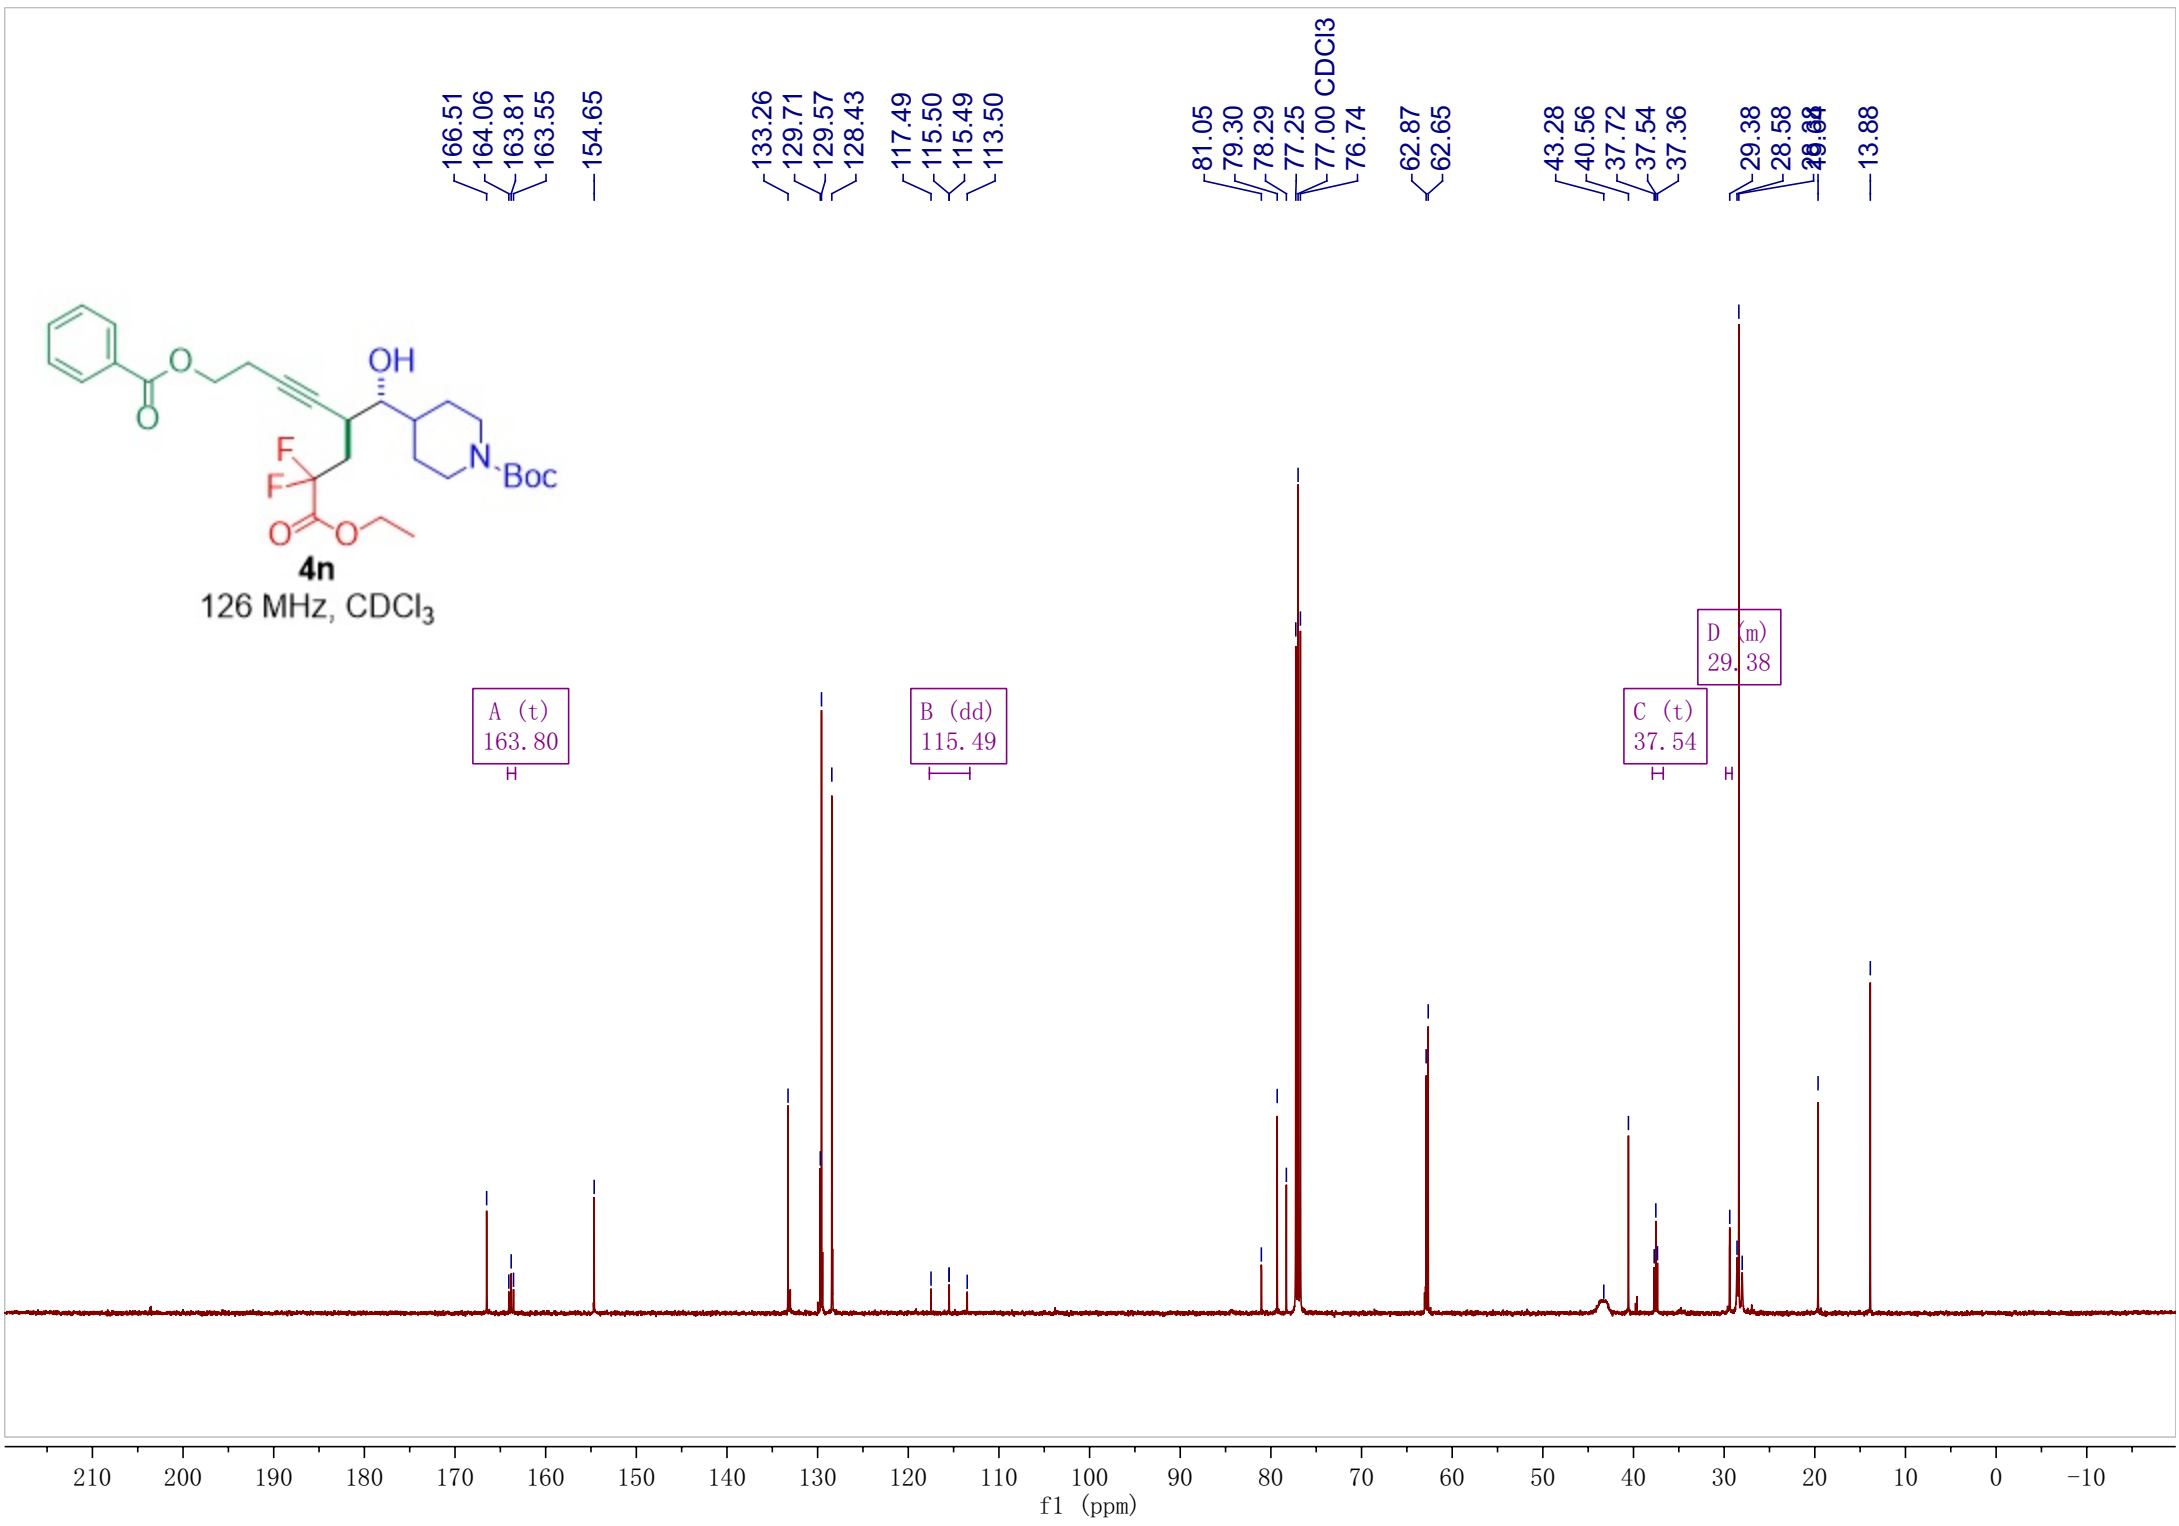



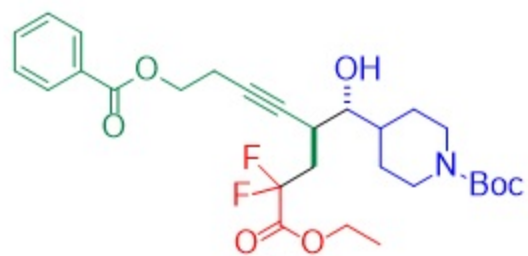

**4n**  
471 MHz, CDCl<sub>3</sub>

102.87  
103.43  
106.09  
106.62

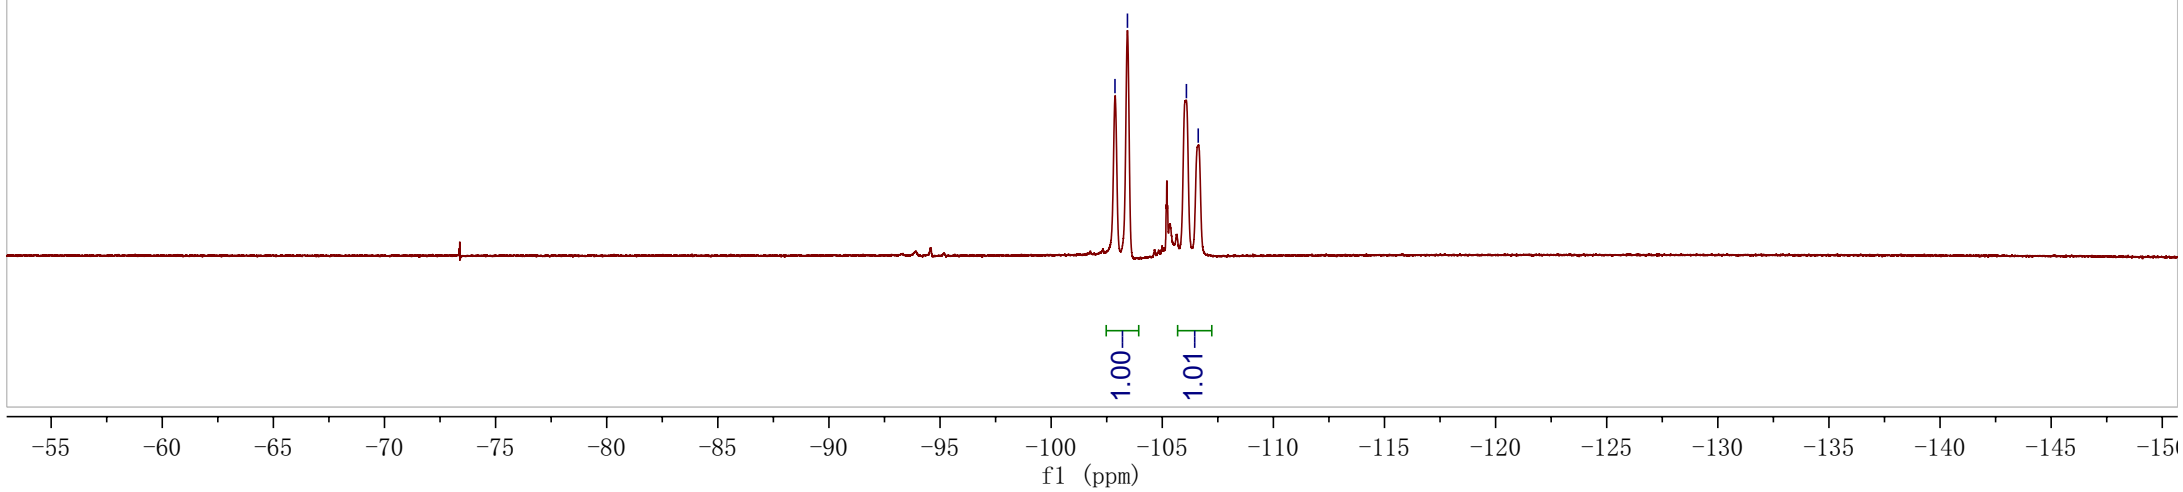



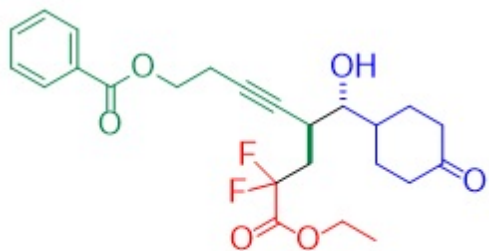

**4o**

126 MHz, CDCl<sub>3</sub>

—211.46

166.60  
164.05  
163.80  
163.53

133.38  
129.71  
129.58  
128.50  
117.45  
115.46  
115.45  
113.46

81.41  
78.22  
77.25  
77.00 CDCl<sub>3</sub>  
76.75  
76.34

62.95  
62.64

40.35  
39.97  
39.95  
37.75  
37.56  
37.38  
29.97  
28.94  
28.72

—19.74  
—13.90

A (t)  
163.79  
H

B (dd)  
115.45  
H

C (t)  
37.56  
H

D (m)  
29.98  
H

210 200 190 180 170 160 150 140 130 120 110 100 90 80 70 60 50 40 30 20 10 0 -10

f1 (ppm)

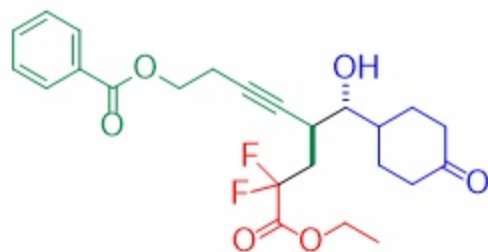

**4o**

471 MHz, CDCl<sub>3</sub>

102.99  
103.01  
103.05  
103.53  
103.57  
103.61  
106.00  
106.04  
106.08  
106.56  
106.60  
106.64

1.00

1.04

-65 -70 -75 -80 -85 -90 -95 -100 -105 -110 -115 -120 -125 -130 -135 -140 -145 -150

f1 (ppm)

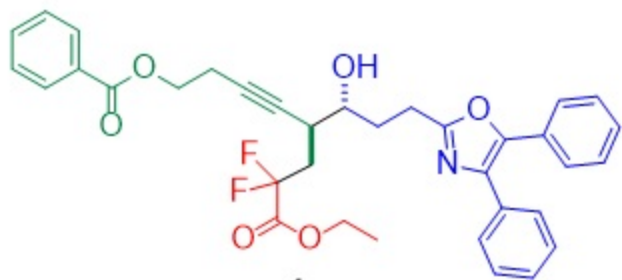

4p

500 MHz, CDCl<sub>3</sub>

8.05  
8.03  
7.62  
7.60  
7.58  
7.56  
7.54  
7.52  
7.50  
7.43  
7.41  
7.39  
7.38  
7.36  
7.34  
7.32  
7.26 CDCl<sub>3</sub>

4.44  
4.42  
4.40  
4.33  
4.31  
4.29  
4.27  
3.76  
3.75  
3.74  
2.99  
2.98  
2.96  
2.67  
2.67  
2.65  
2.65  
2.64  
2.10  
2.10  
1.99  
1.33  
1.31

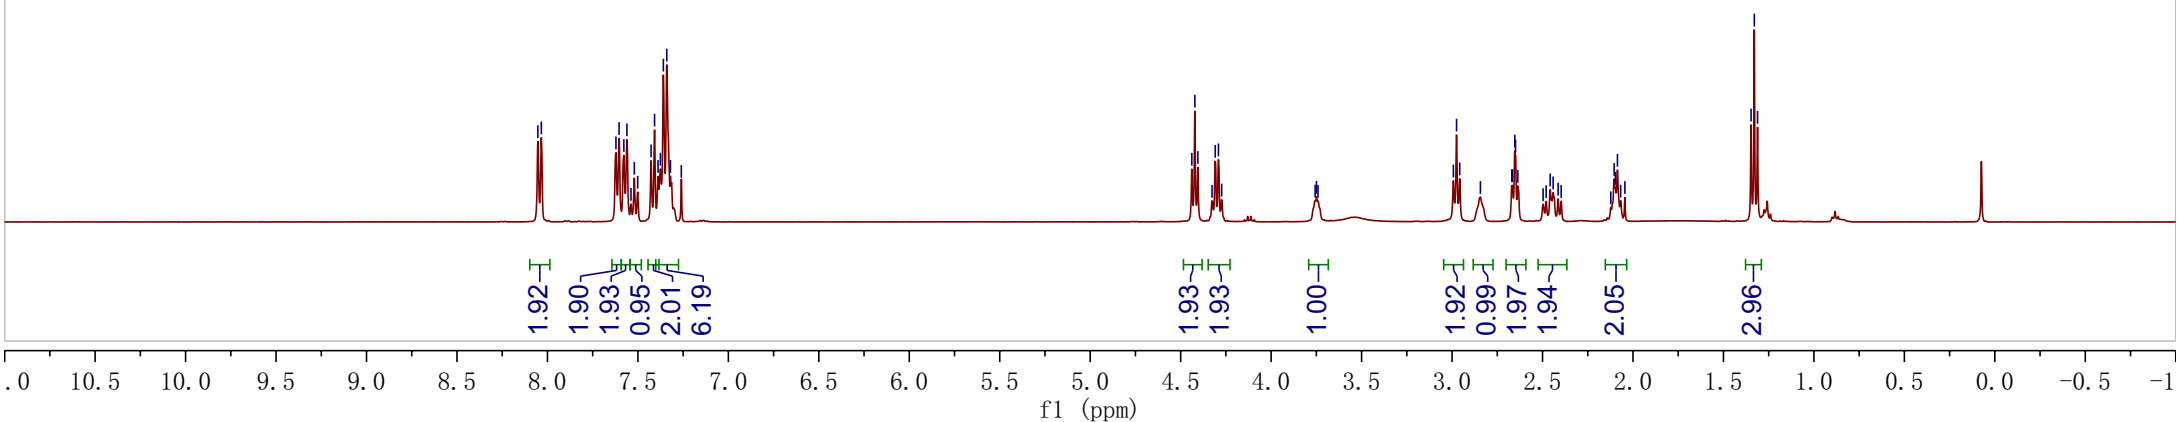

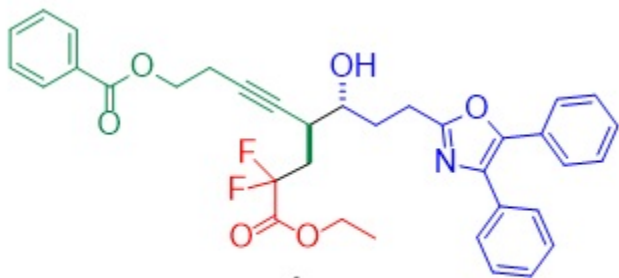

**4p**  
126 MHz, CDCl<sub>3</sub>

166.41  
164.15  
163.89  
163.63  
163.25

— 145.29

129.59  
128.62  
128.53  
128.34  
127.81  
126.43  
117.57  
115.58  
115.57  
113.58

80.56  
79.12  
77.25  
77.00 CDCl<sub>3</sub>  
76.75  
72.71  
62.84  
62.72

36.71  
36.53  
36.35  
32.69  
31.68  
25.26  
19.55  
13.88

A (t)  
163.89  
H

B (dd)  
115.58  
H

D (m)  
32.69  
C (t)  
36.53  
H H

210 200 190 180 170 160 150 140 130 120 110 100 90 80 70 60 50 40 30 20 10 0 -10

f1 (ppm)

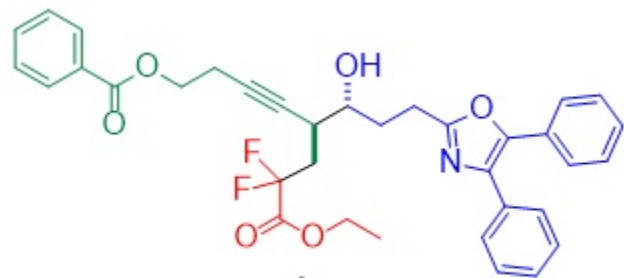

**4p**  
471 MHz, CDCl<sub>3</sub>

102.89  
102.94  
102.97  
103.44  
103.49  
103.50

105.75  
105.79  
105.82  
106.30  
106.34  
106.38

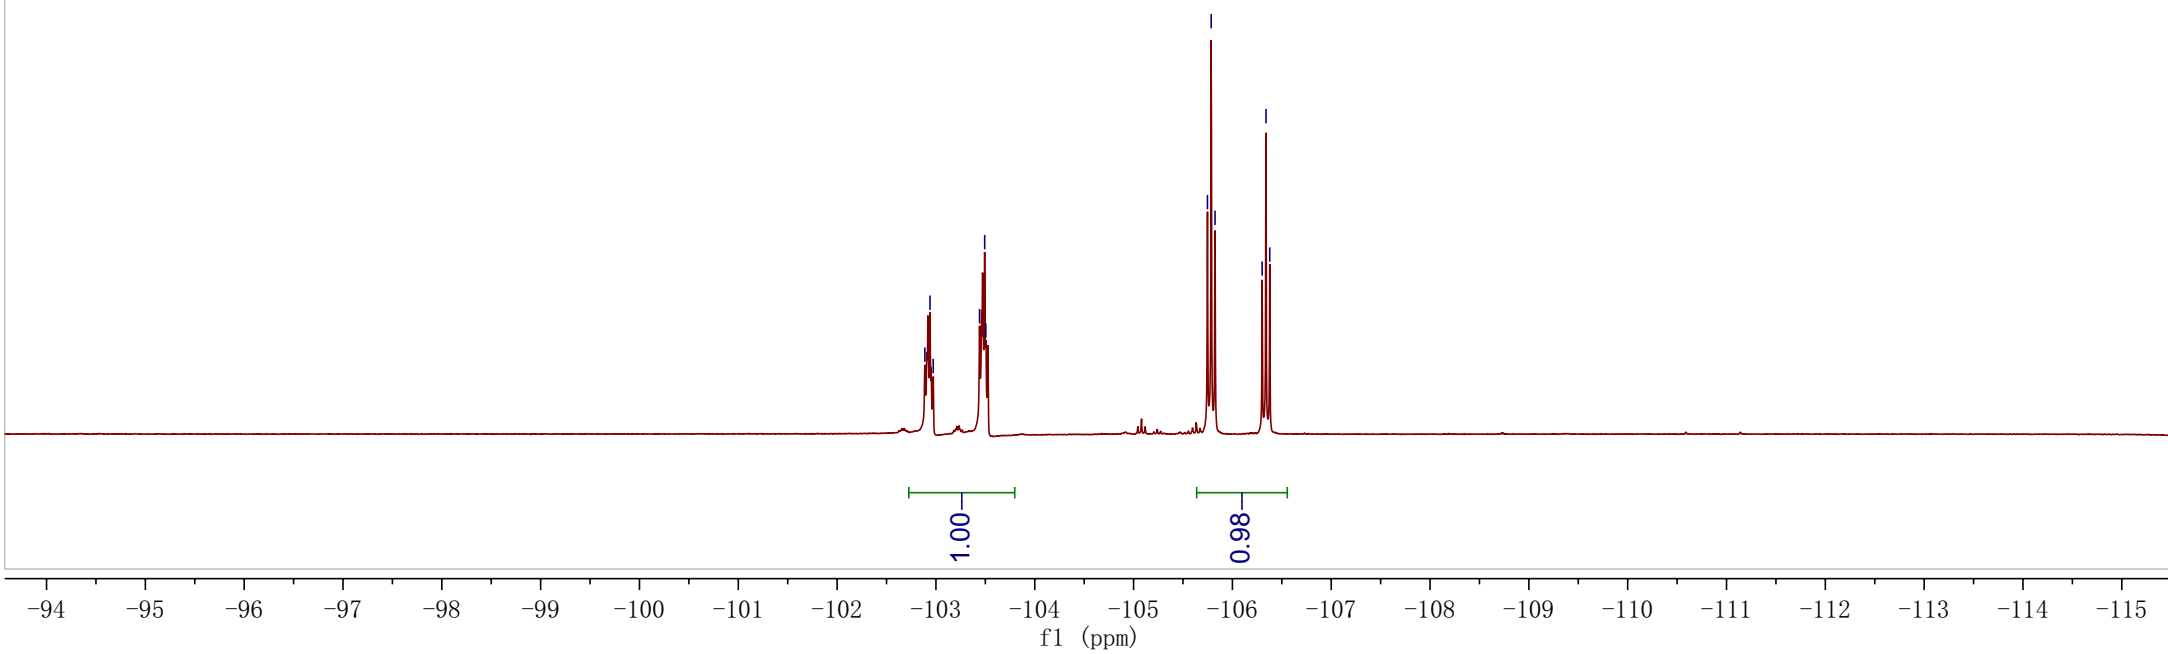

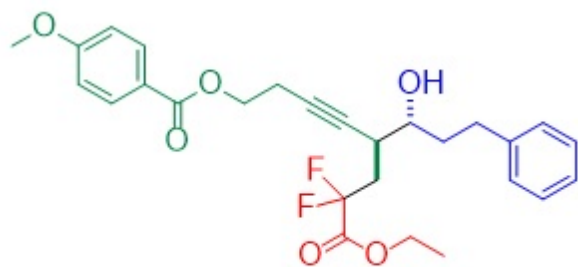

**4q**  
500 MHz, CDCl<sub>3</sub>

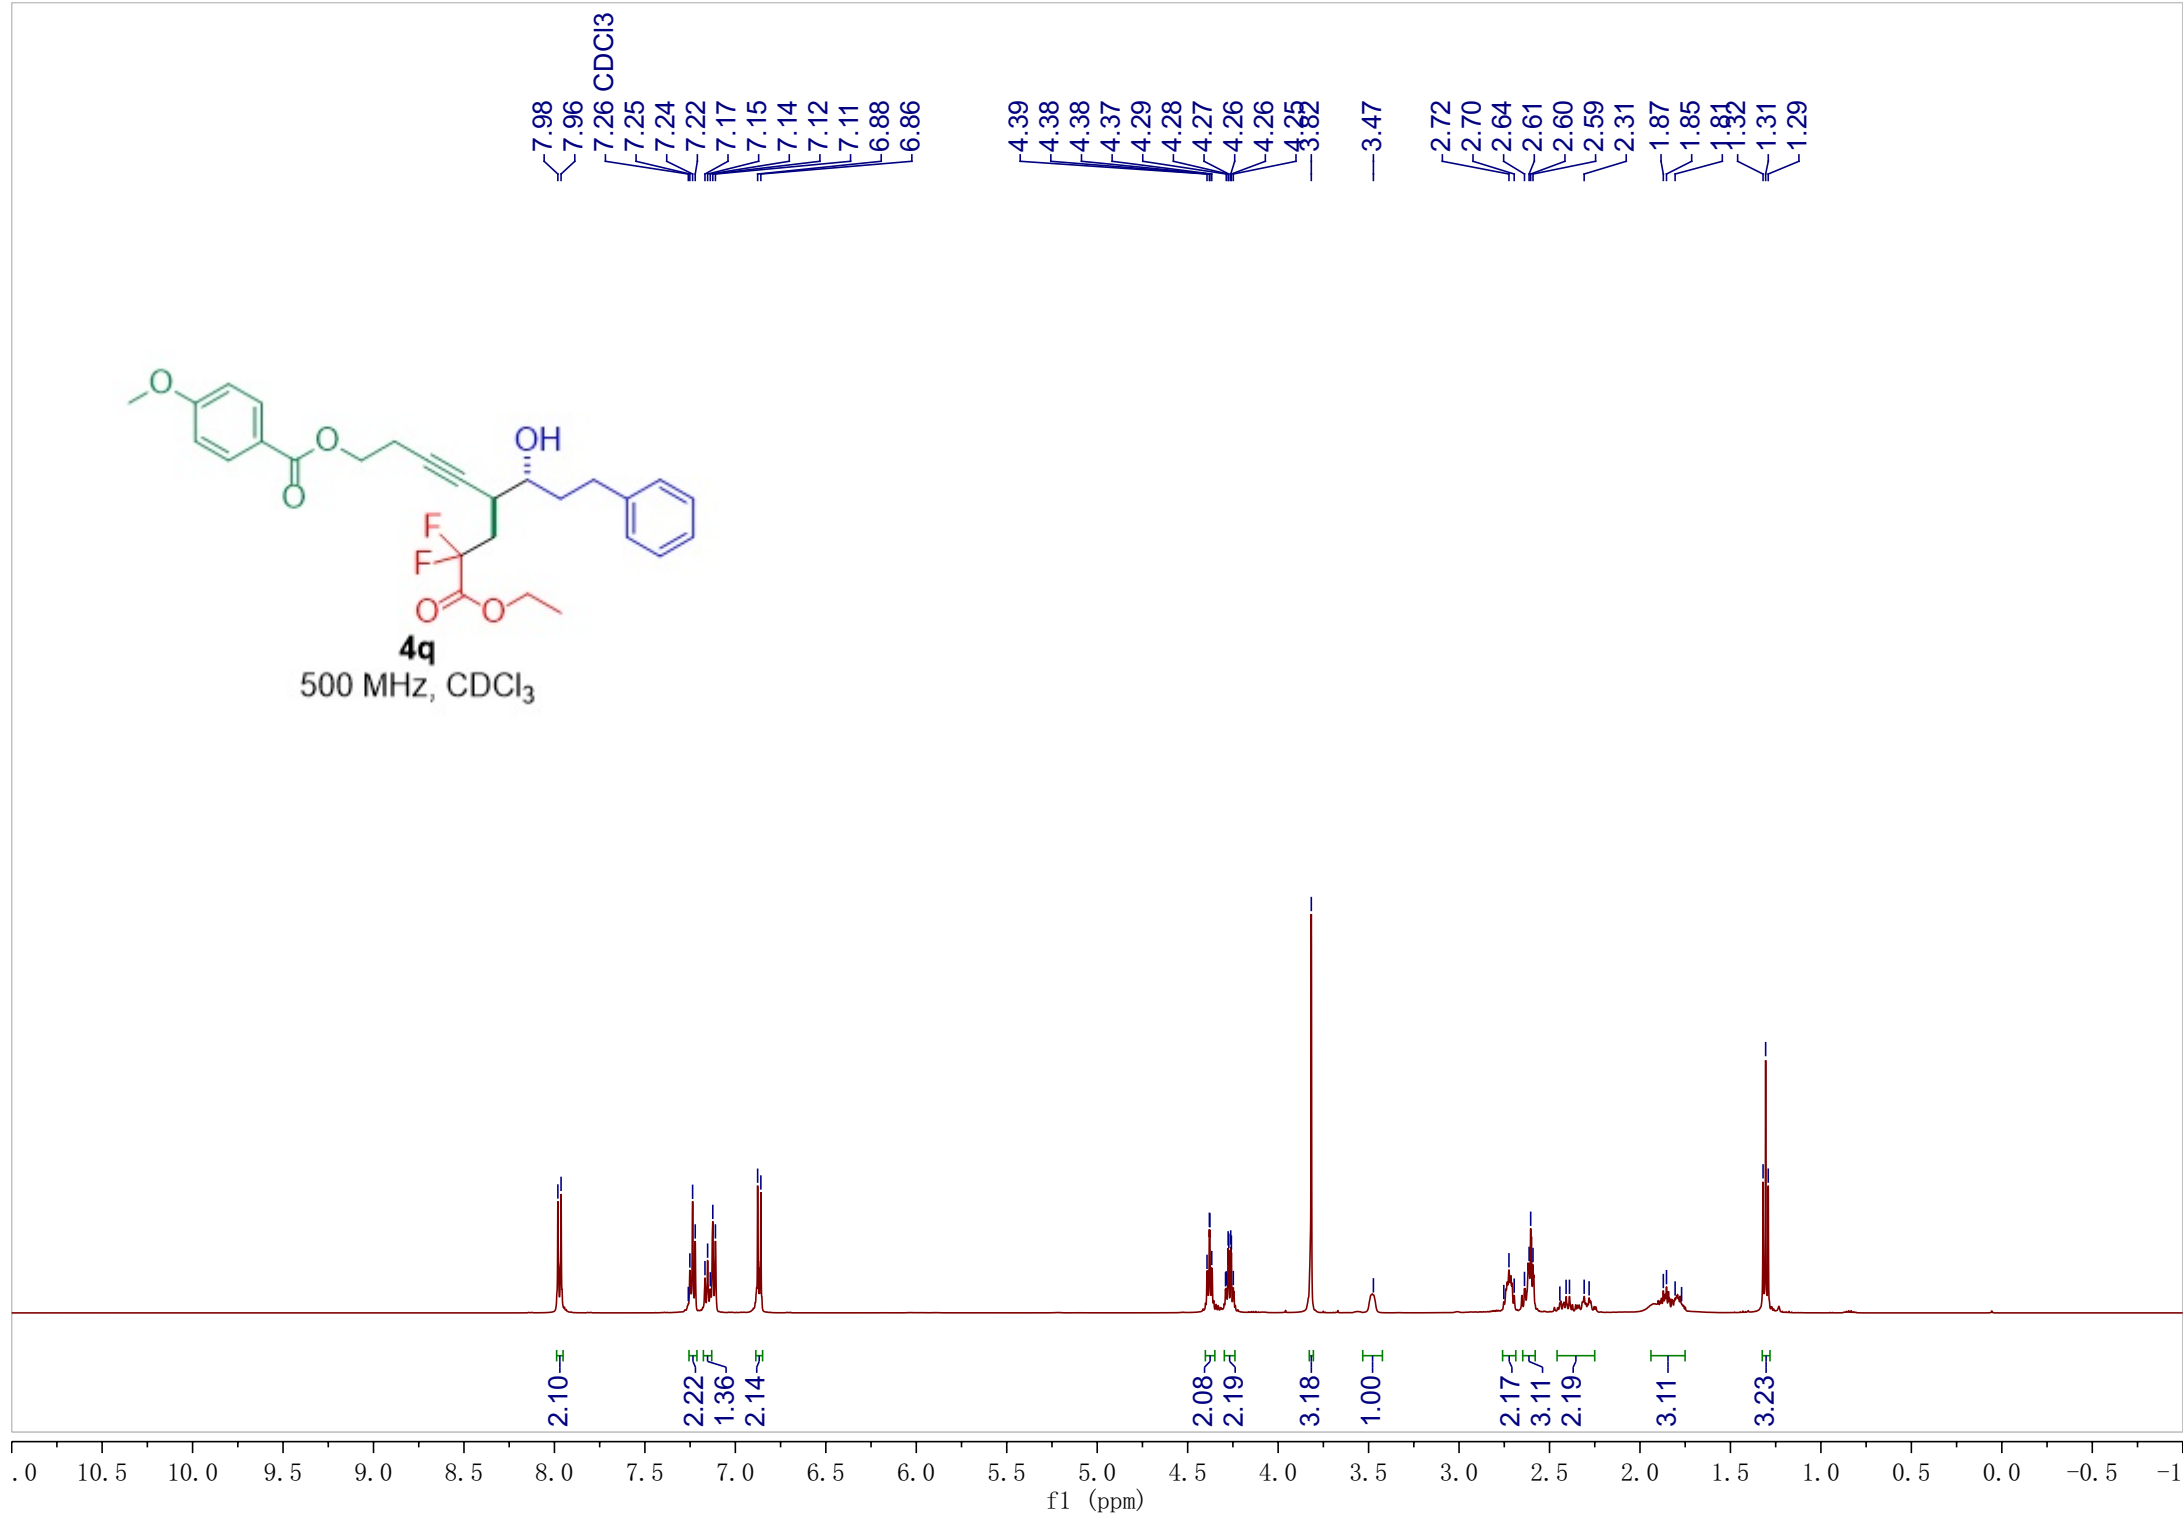



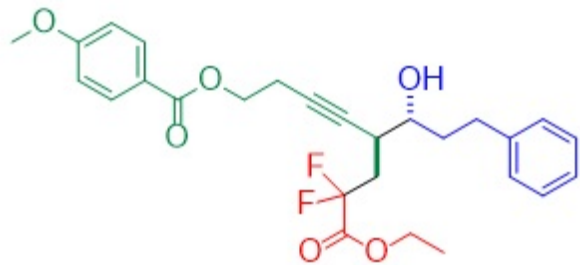

**4q**  
126 MHz, CDCl<sub>3</sub>

166.25  
164.10  
163.84  
163.58  
163.49

141.45  
131.67  
128.36  
128.33  
125.86  
122.12  
117.52  
115.52  
115.48  
113.63  
113.53

81.03  
78.71  
77.25  
77.00 CDCl<sub>3</sub>  
76.75  
72.44  
62.84  
62.39  
55.37

37.25  
37.06  
36.89  
32.49  
32.46  
31.95  
19.65  
13.86

A (t)  
163.84  
H

B (dd)  
115.51  
H

D (m)  
37.06  
H

C (m)  
32.48  
H

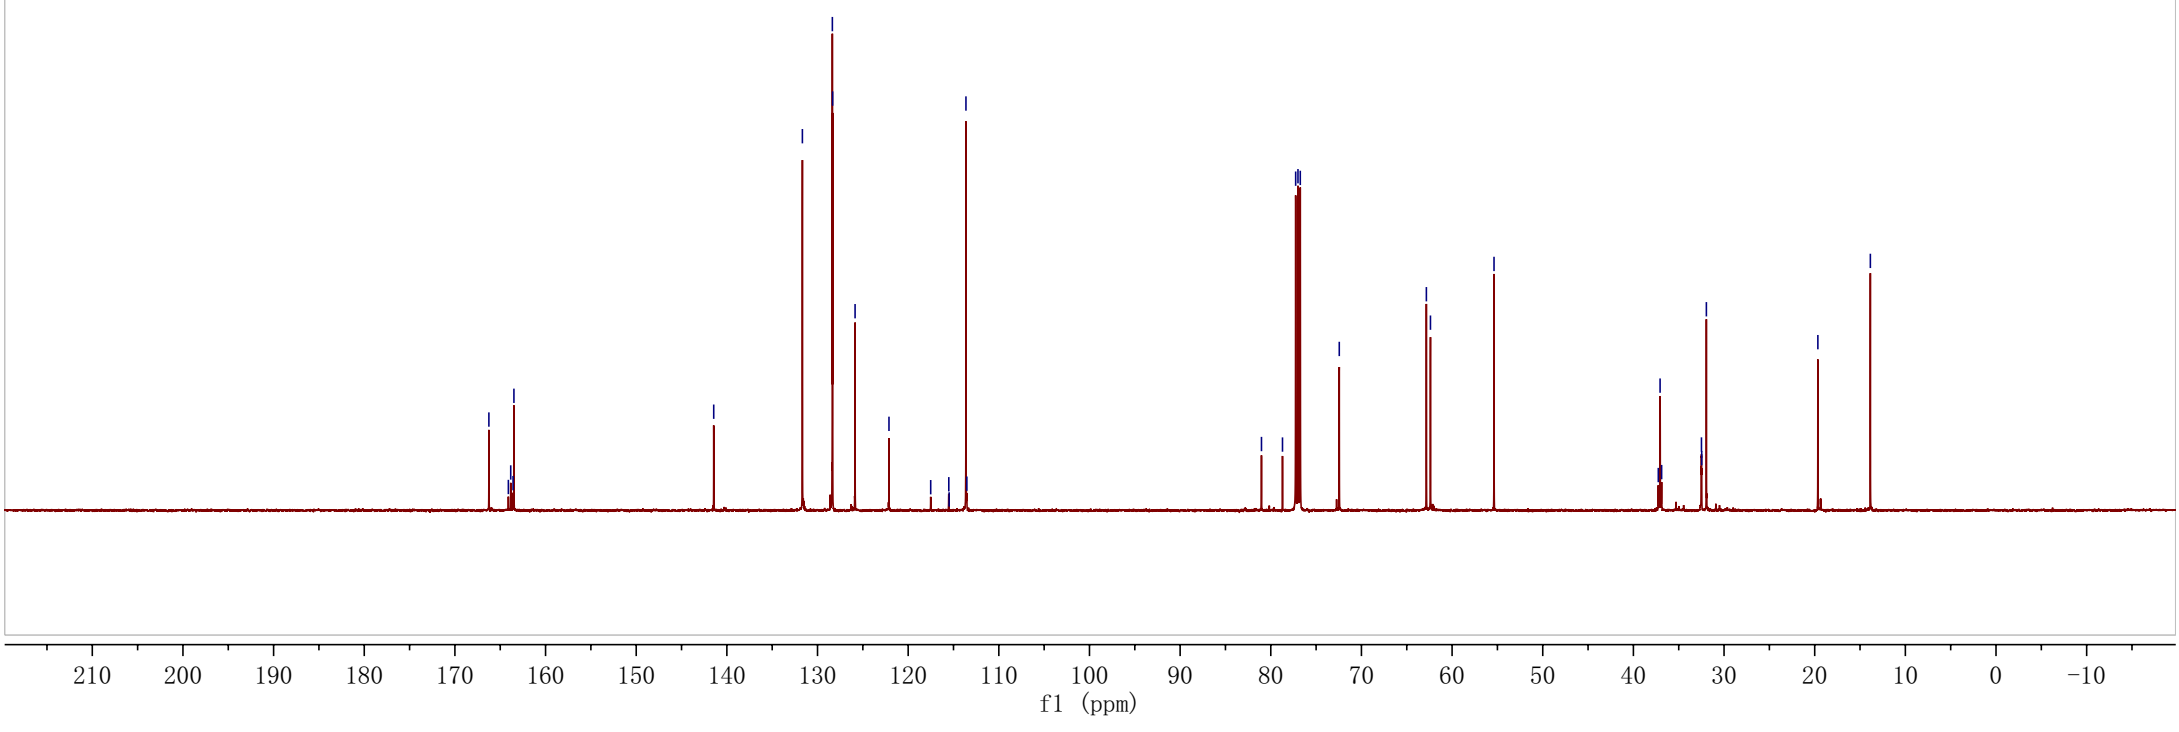

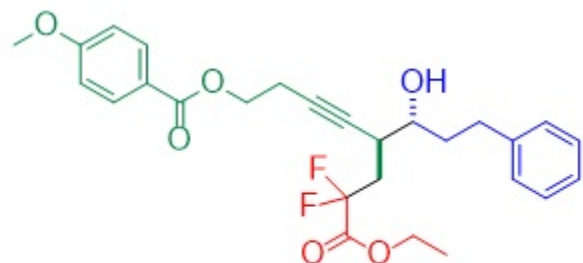

**4q**  
471 MHz, CDCl<sub>3</sub>

102.73

103.29

105.98

106.01

106.05

106.53

106.57

106.61

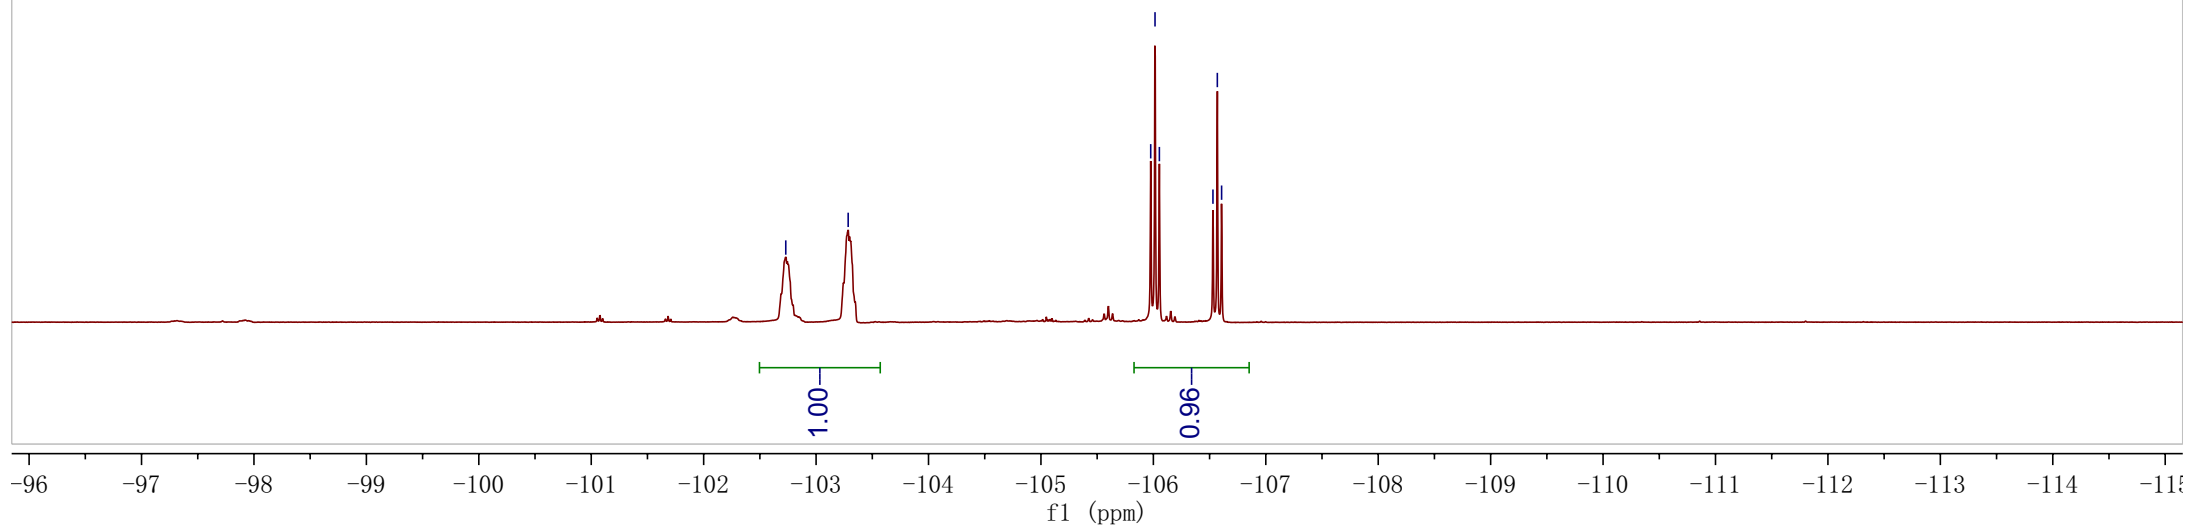

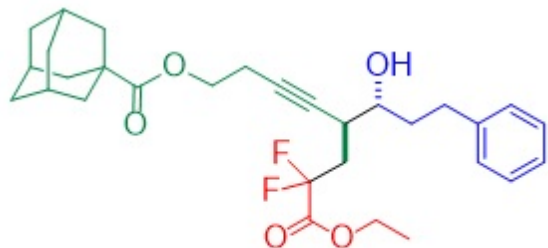

**4r**  
500 MHz, CDCl<sub>3</sub>

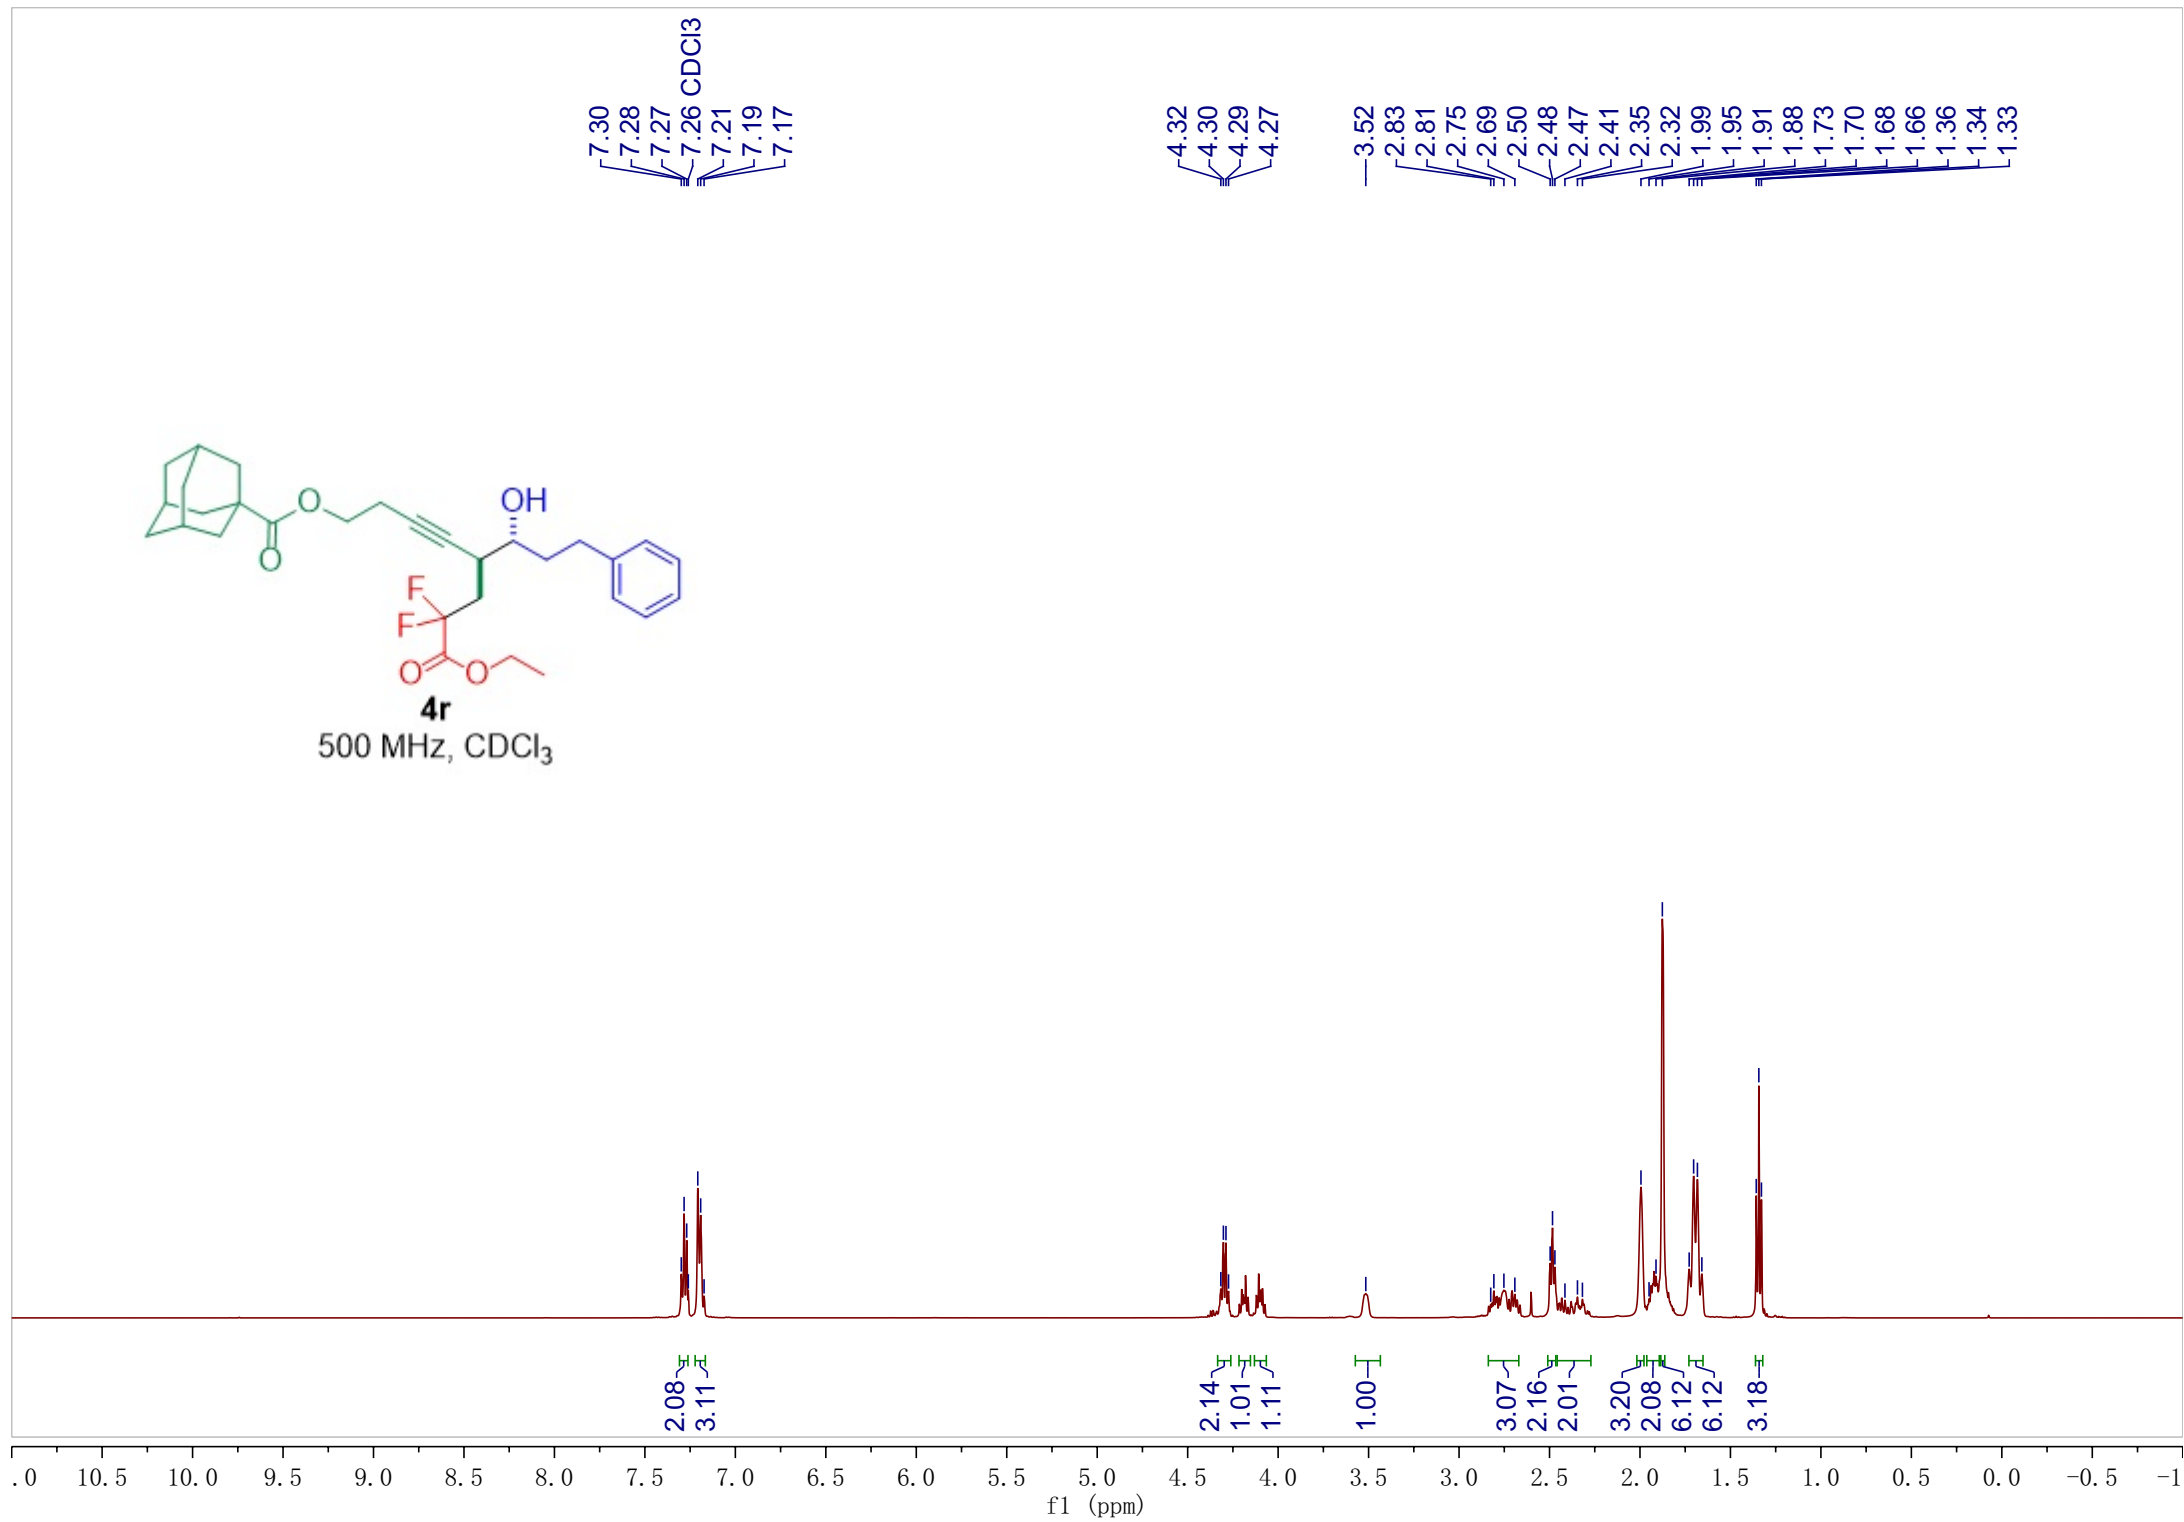

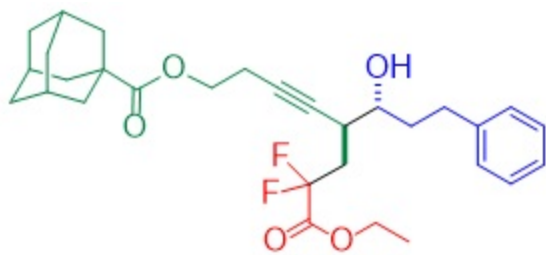

**4r**  
126 MHz, CDCl<sub>3</sub>

—177.60

164.08  
163.82  
163.56

—141.44

128.38  
128.35  
125.89  
117.48  
115.49  
115.48  
113.49

81.10  
78.39  
77.25  
77.00 CDCl<sub>3</sub>  
76.74  
72.36  
62.83  
61.90

40.63  
38.69  
37.23  
37.10  
37.05  
36.86  
36.36  
32.48  
31.98  
27.80  
19.40  
—13.86

A (t)  
163.82  
H

B (dd)  
115.49  
H

D (t)  
37.05  
H

C (m)  
32.48  
H

210 200 190 180 170 160 150 140 130 120 110 100 90 80 70 60 50 40 30 20 10 0 -10  
f1 (ppm)

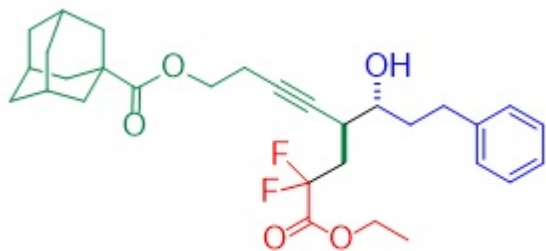

**4r**  
471 MHz, CDCl<sub>3</sub>

102.86  
102.89  
102.92  
103.41  
103.44  
103.45  
103.48

105.87  
105.91  
105.95  
106.43  
106.46  
106.50

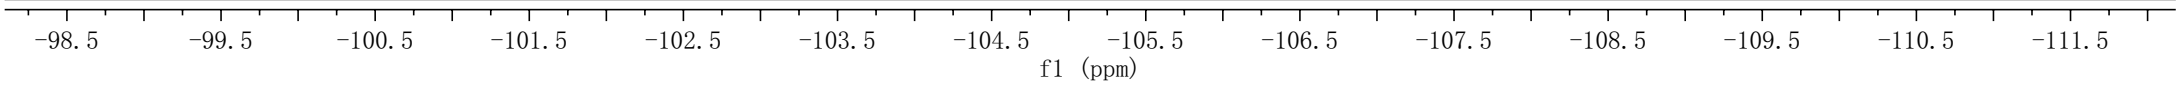

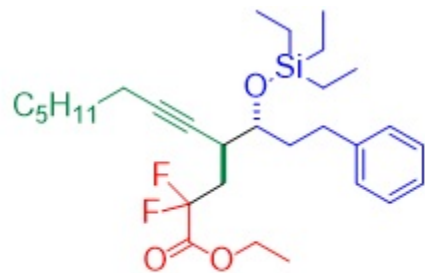

**4s**

500 MHz, CDCl<sub>3</sub>

7.31  
7.29  
7.28  
7.26  
7.21  
7.19

4.32  
4.31  
4.29  
4.28  
3.84  
3.81

2.80  
2.78  
2.74  
2.57  
2.55  
2.44  
2.42  
2.23  
2.13  
2.12

1.46  
1.37  
1.36  
1.34  
1.30  
1.29  
1.00  
0.98  
0.97  
0.90  
0.88  
0.87  
0.66  
0.64  
0.62  
0.61

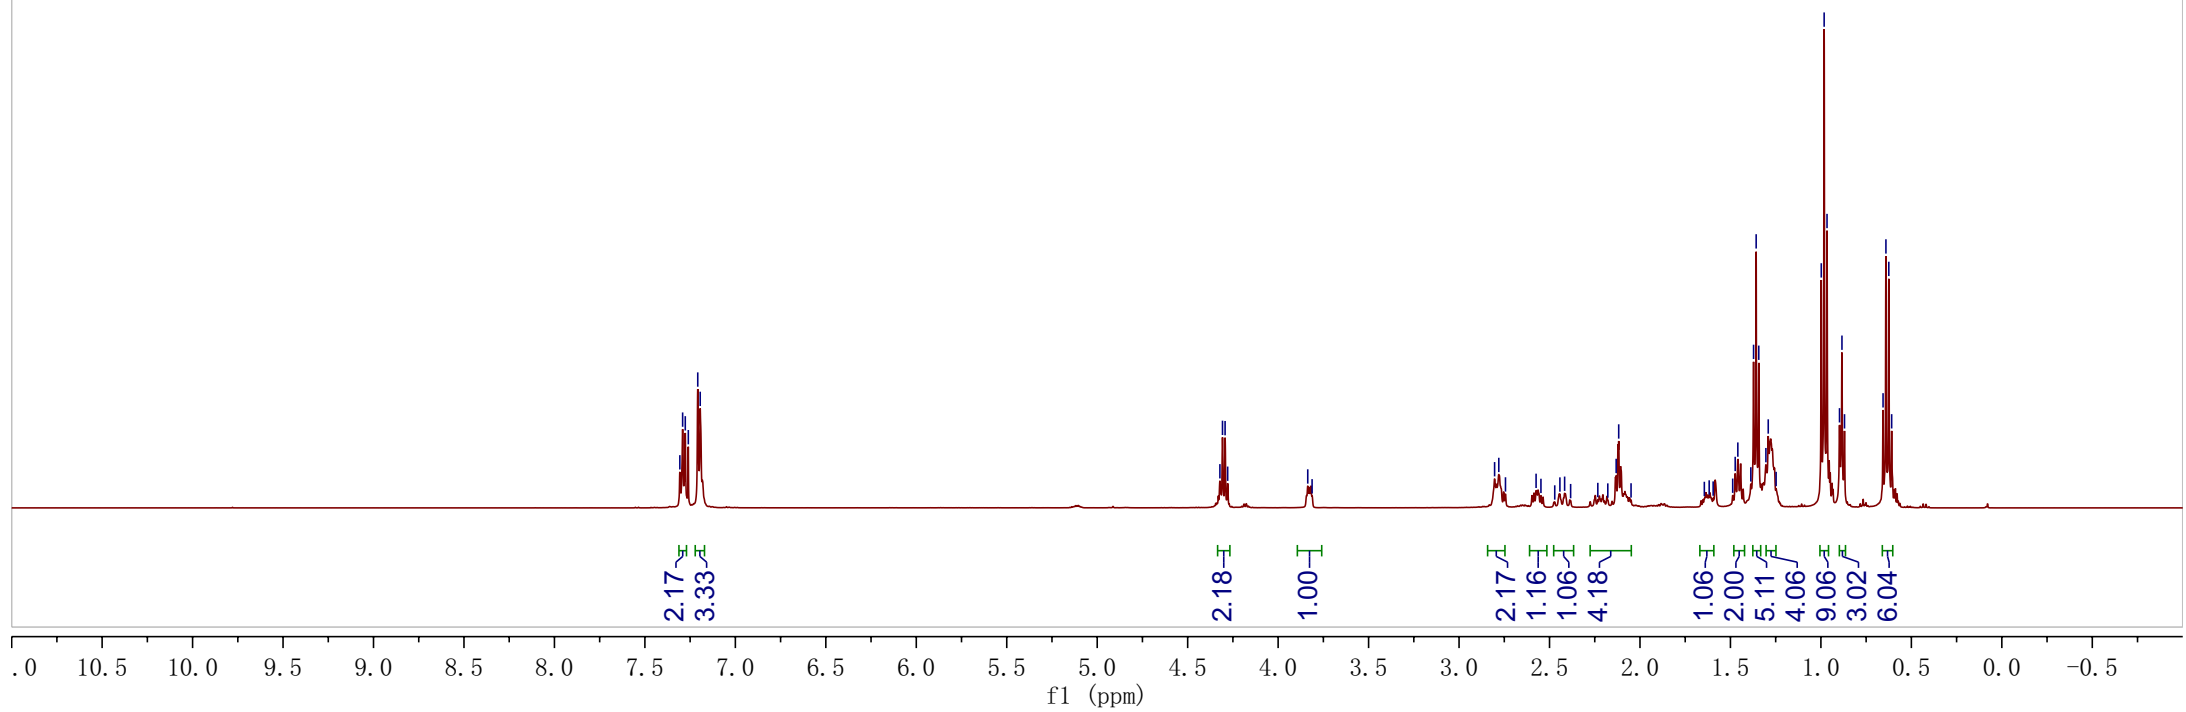

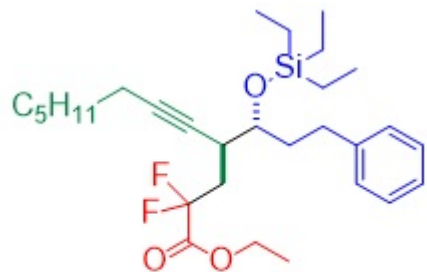

**4s**

126 MHz, CDCl<sub>3</sub>

A (t)  
164.08  
H

D (dd)  
116.07  
H

B (t)  
34.15  
H

C (m)  
32.09

164.34  
164.08  
163.82

142.14

128.35  
128.28  
125.80  
118.06  
116.09  
116.06  
114.08

84.13  
78.16  
77.25  
77.00 CDCl<sub>3</sub>  
76.75  
73.67

62.64

34.82  
34.34  
34.15  
33.97  
32.81  
32.11  
31.32  
28.75  
28.50  
22.53  
18.76  
14.04  
13.87  
6.86  
5.00

210 200 190 180 170 160 150 140 130 120 110 100 90 80 70 60 50 40 30 20 10 0 -10

f1 (ppm)

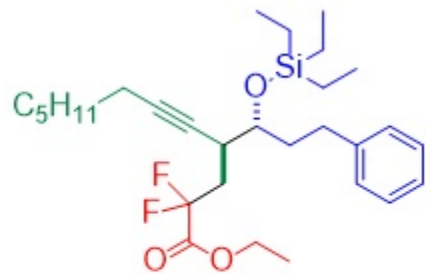

**4s**  
471 MHz, CDCl<sub>3</sub>

101.14  
101.16  
101.19  
101.68  
101.71  
101.74  
107.47  
107.51  
107.55  
108.02  
108.06  
108.10

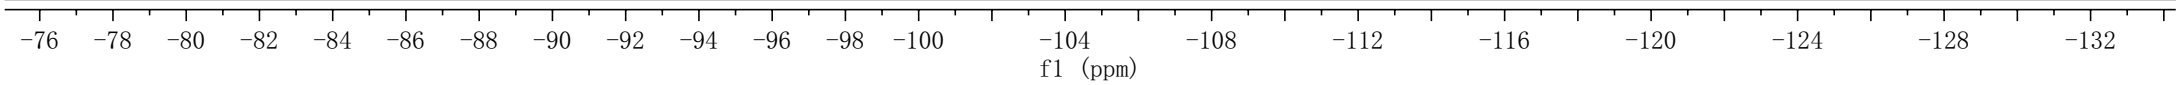



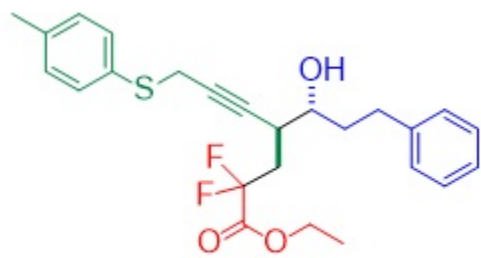

**4t**  
500 MHz, CDCl<sub>3</sub>

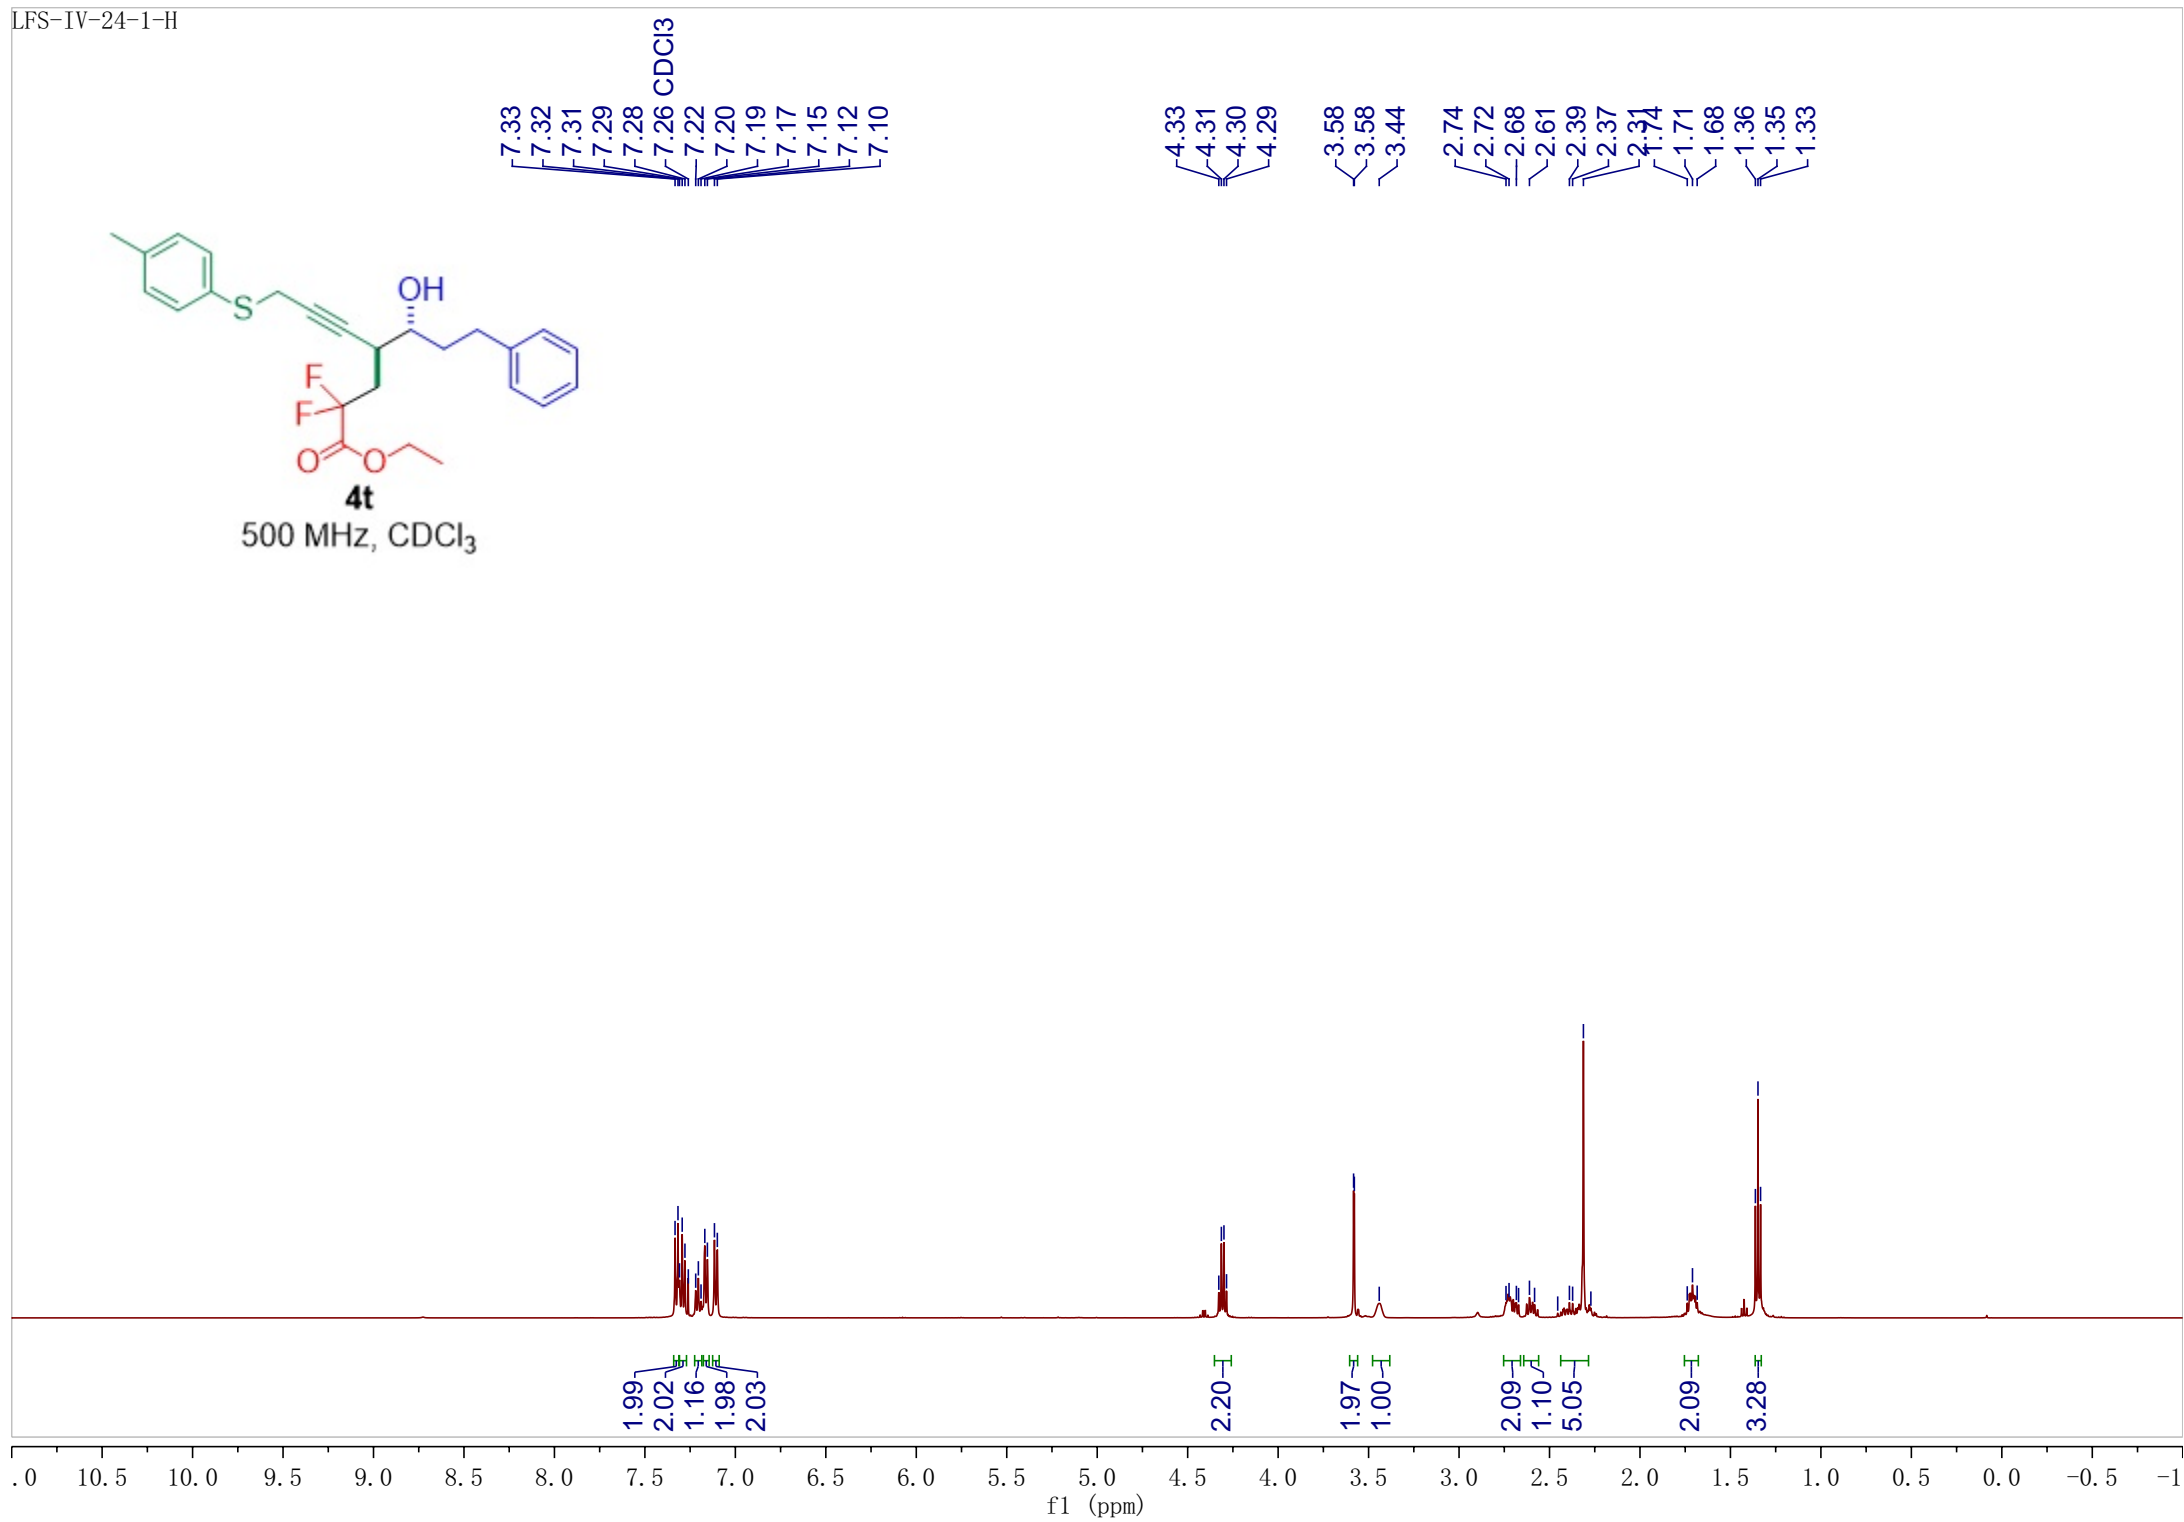

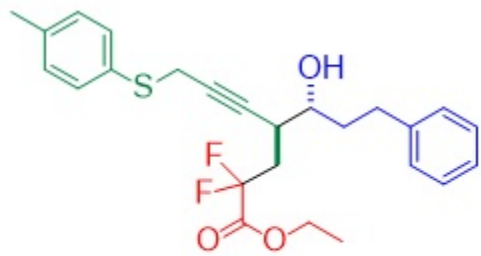

**4t**  
126 MHz, CDCl<sub>3</sub>

164.06  
163.80  
163.54

141.37  
137.39  
131.09  
130.93  
129.78  
128.40  
128.35  
125.93  
117.42  
115.43  
115.42  
113.43

80.84  
80.31  
77.25  
77.00 CDCl<sub>3</sub>  
76.75  
72.31  
— 62.94

37.08  
36.94  
36.90  
36.71  
32.57  
31.90  
23.36  
21.02  
— 13.89

A (t)  
163.80  
H

B (dd)  
115.42  
H

D (m)  
32.56  
C (t)  
36.90  
H H

210 200 190 180 170 160 150 140 130 120 110 100 90 80 70 60 50 40 30 20 10 0 -10  
f1 (ppm)

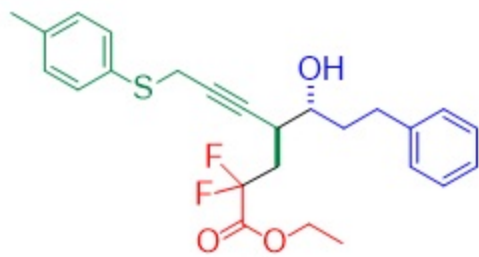

**4t**  
471 MHz, CDCl<sub>3</sub>

102.79  
102.83  
102.86  
103.35  
103.38  
103.41

106.04  
106.08  
106.12  
106.60  
106.64  
106.67

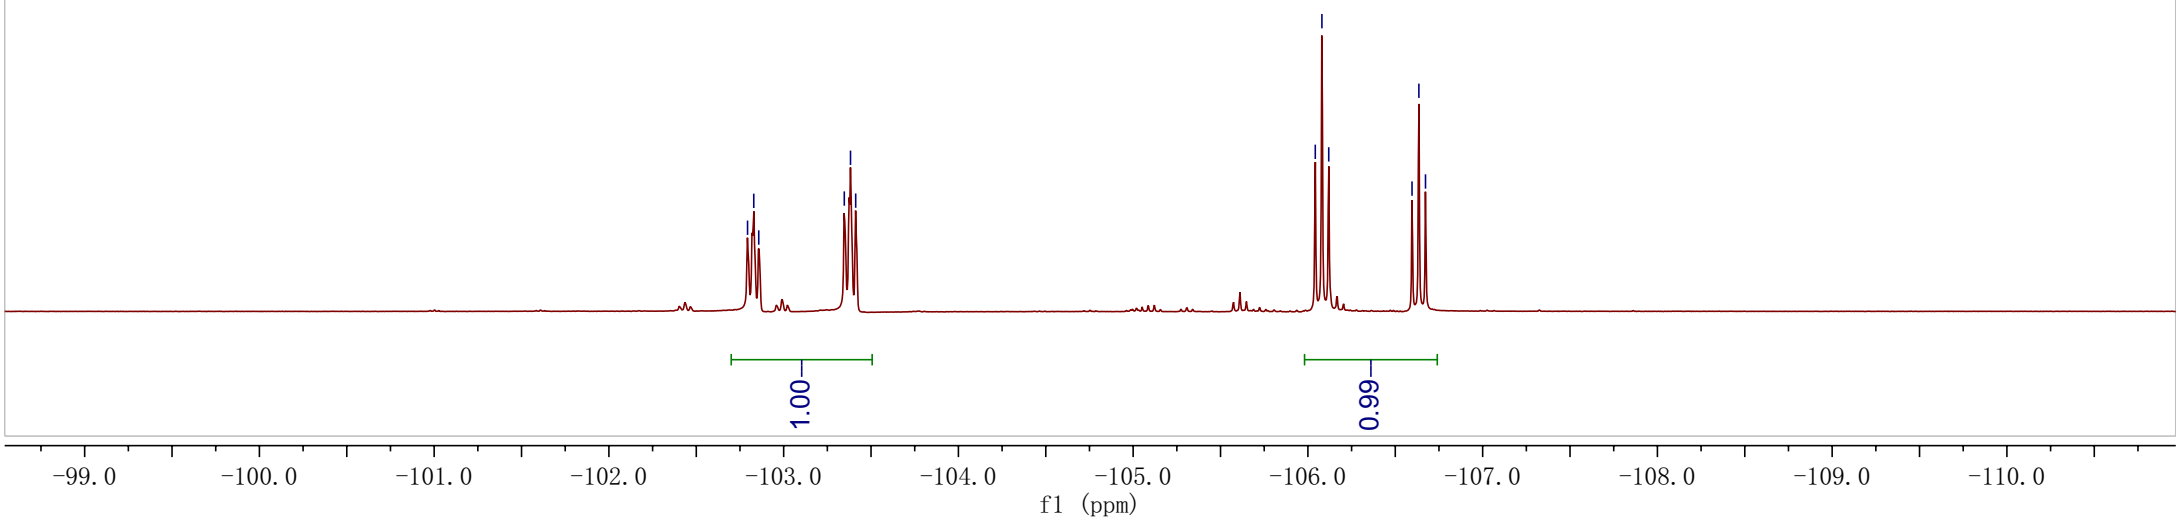

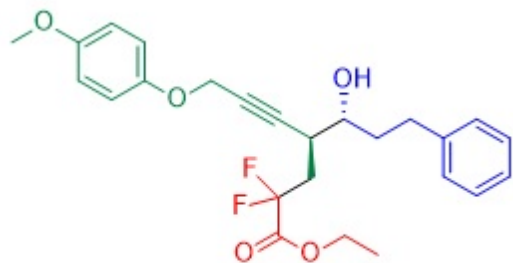

**4u**  
500 MHz, CDCl<sub>3</sub>

7.30  
7.28  
7.27  
7.26 CDCl<sub>3</sub>  
7.21  
7.20  
7.18  
7.16  
7.14  
6.90  
6.88  
6.83  
6.81

4.64  
4.32  
4.31  
4.29  
4.28  
3.75  
3.56  
3.54  
3.53

2.82  
2.74  
2.71  
2.66  
2.65  
2.62  
2.37  
1.81  
1.78  
1.35  
1.34  
1.32

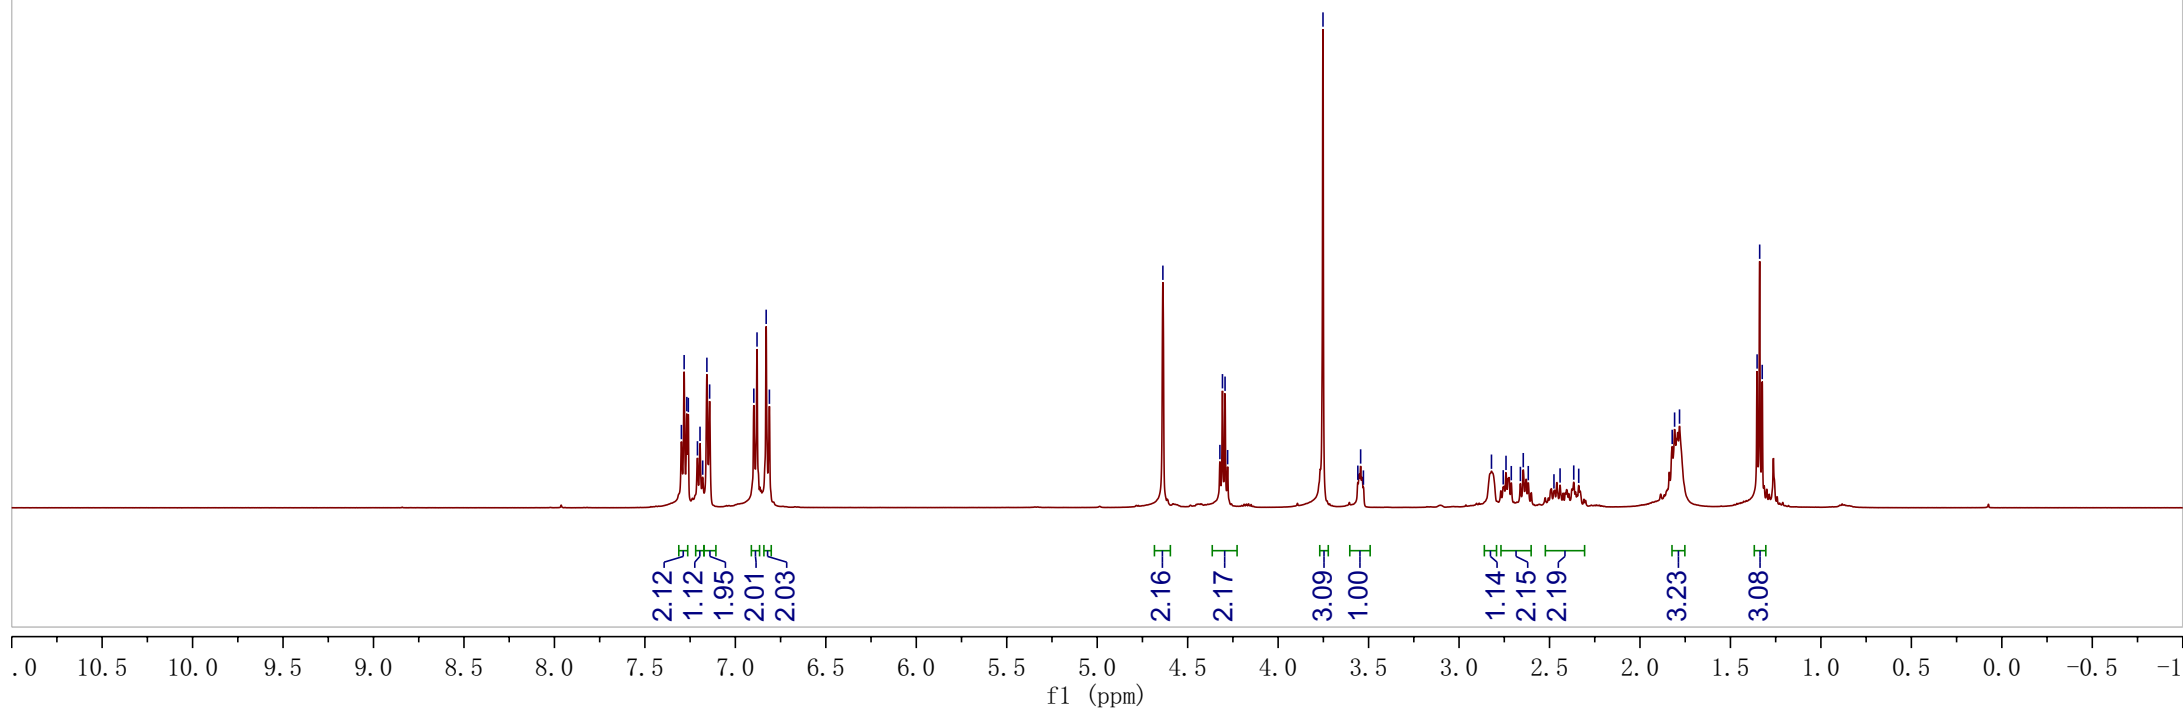

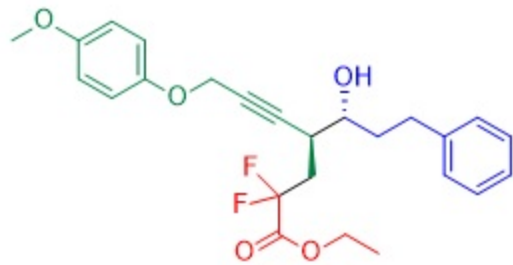

**4u**  
126 MHz, CDCl<sub>3</sub>

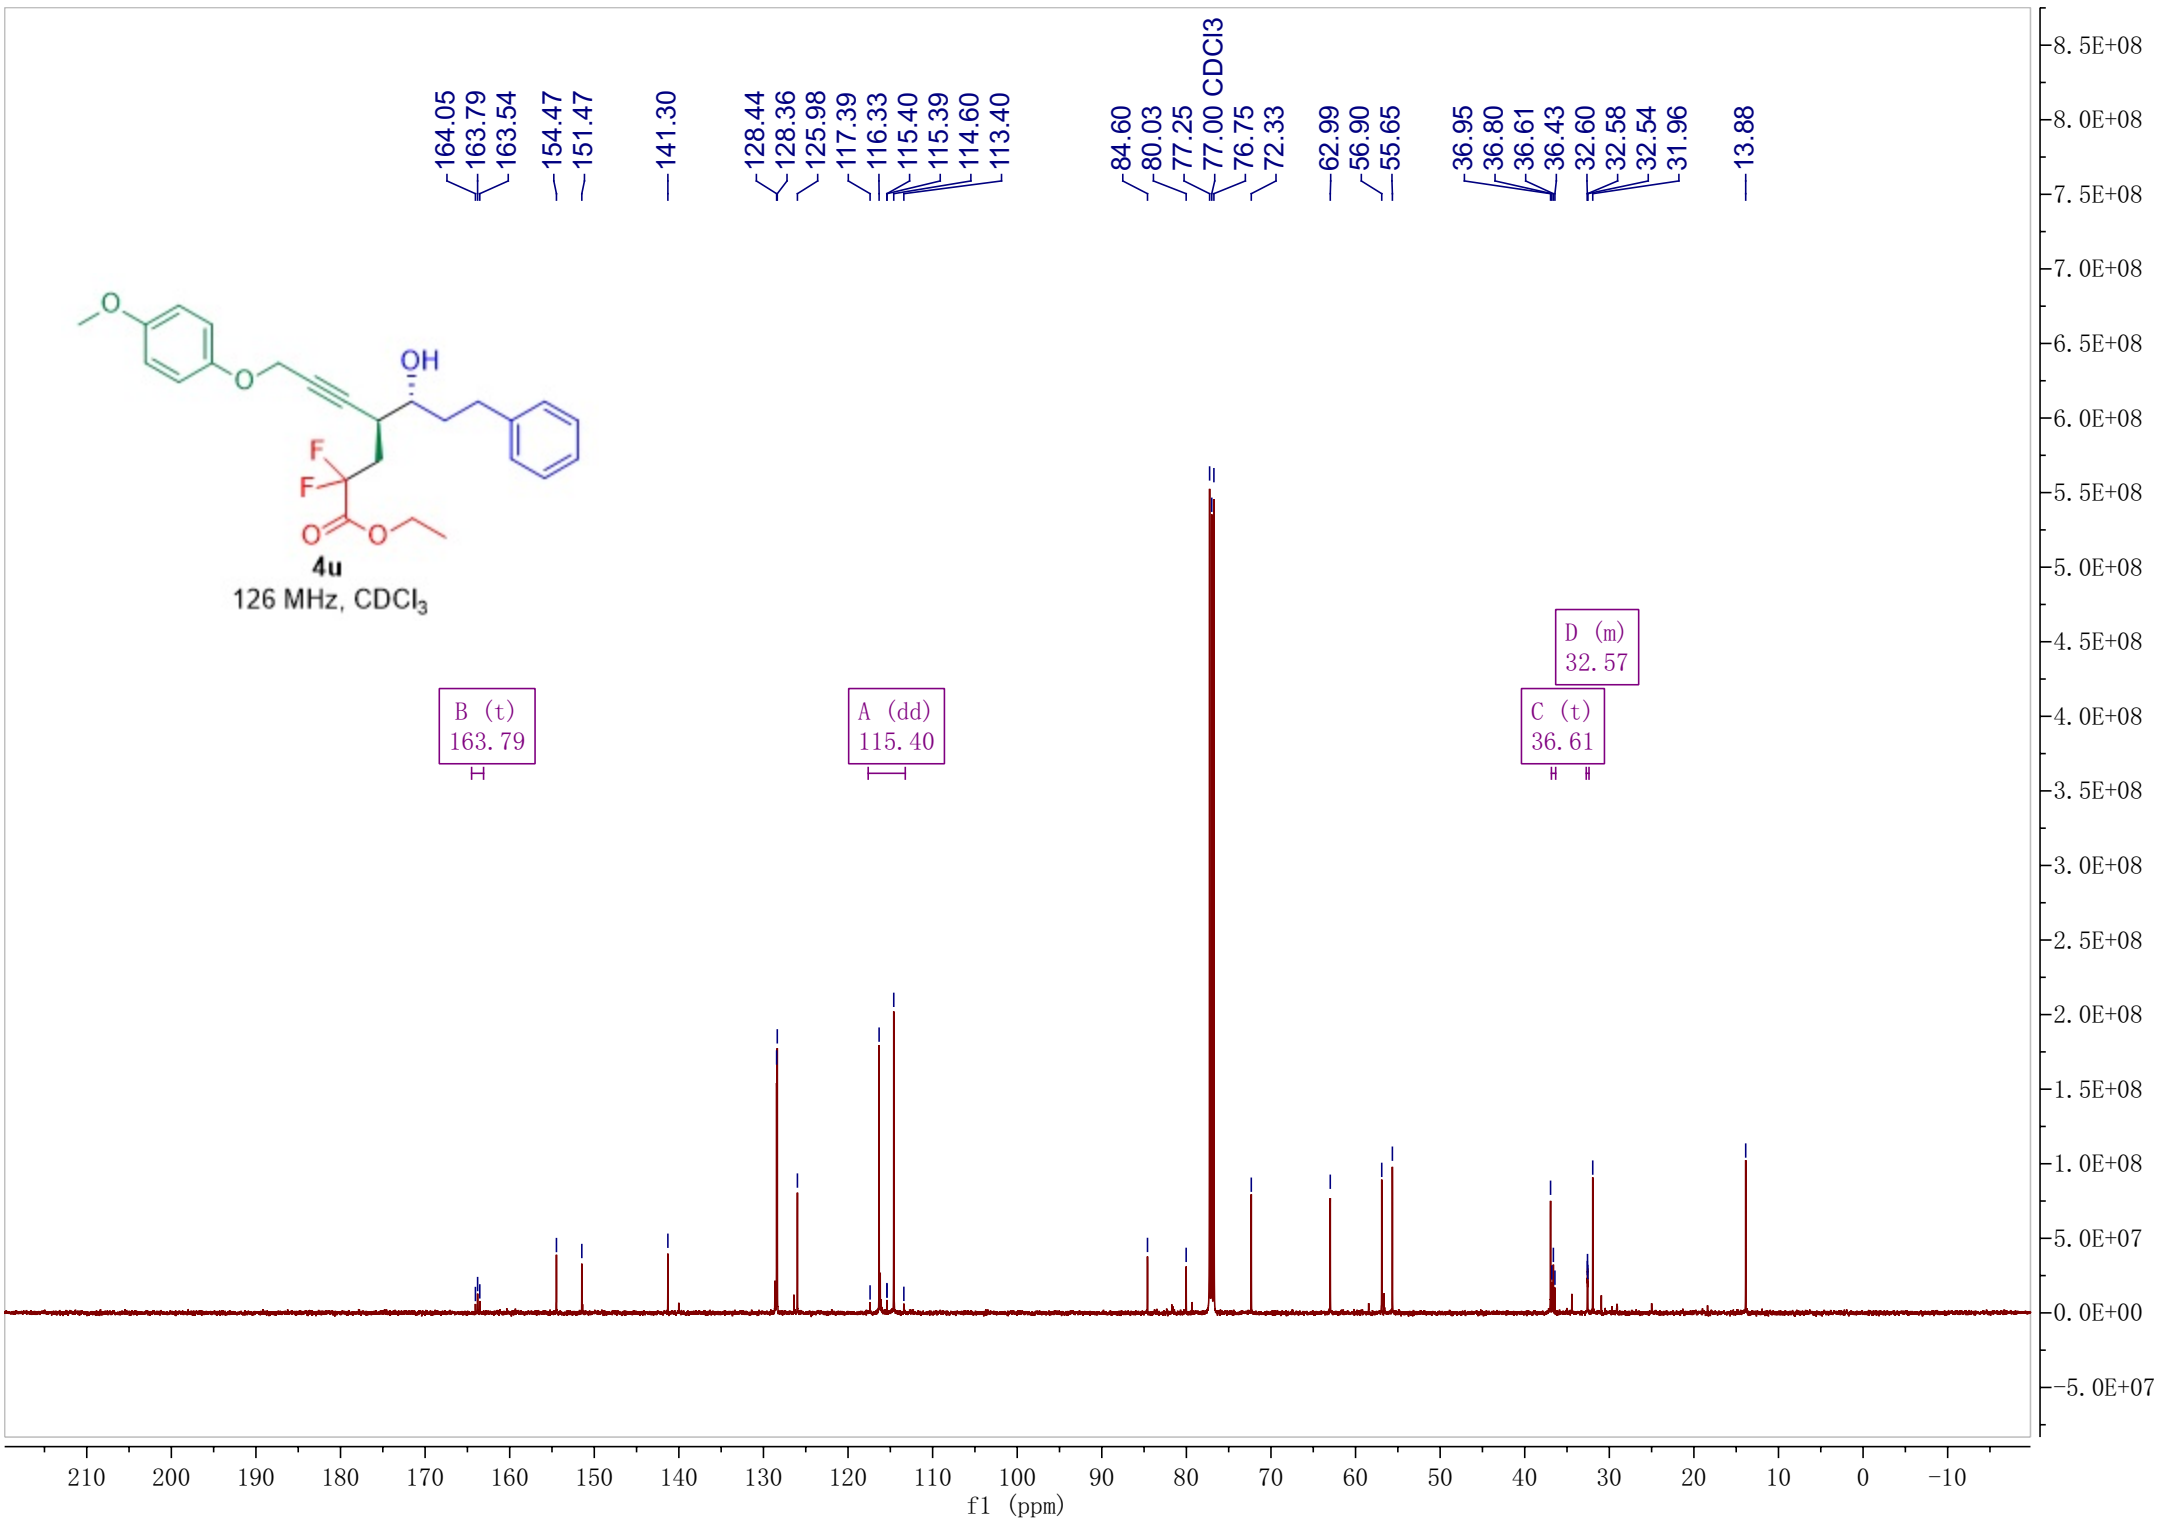

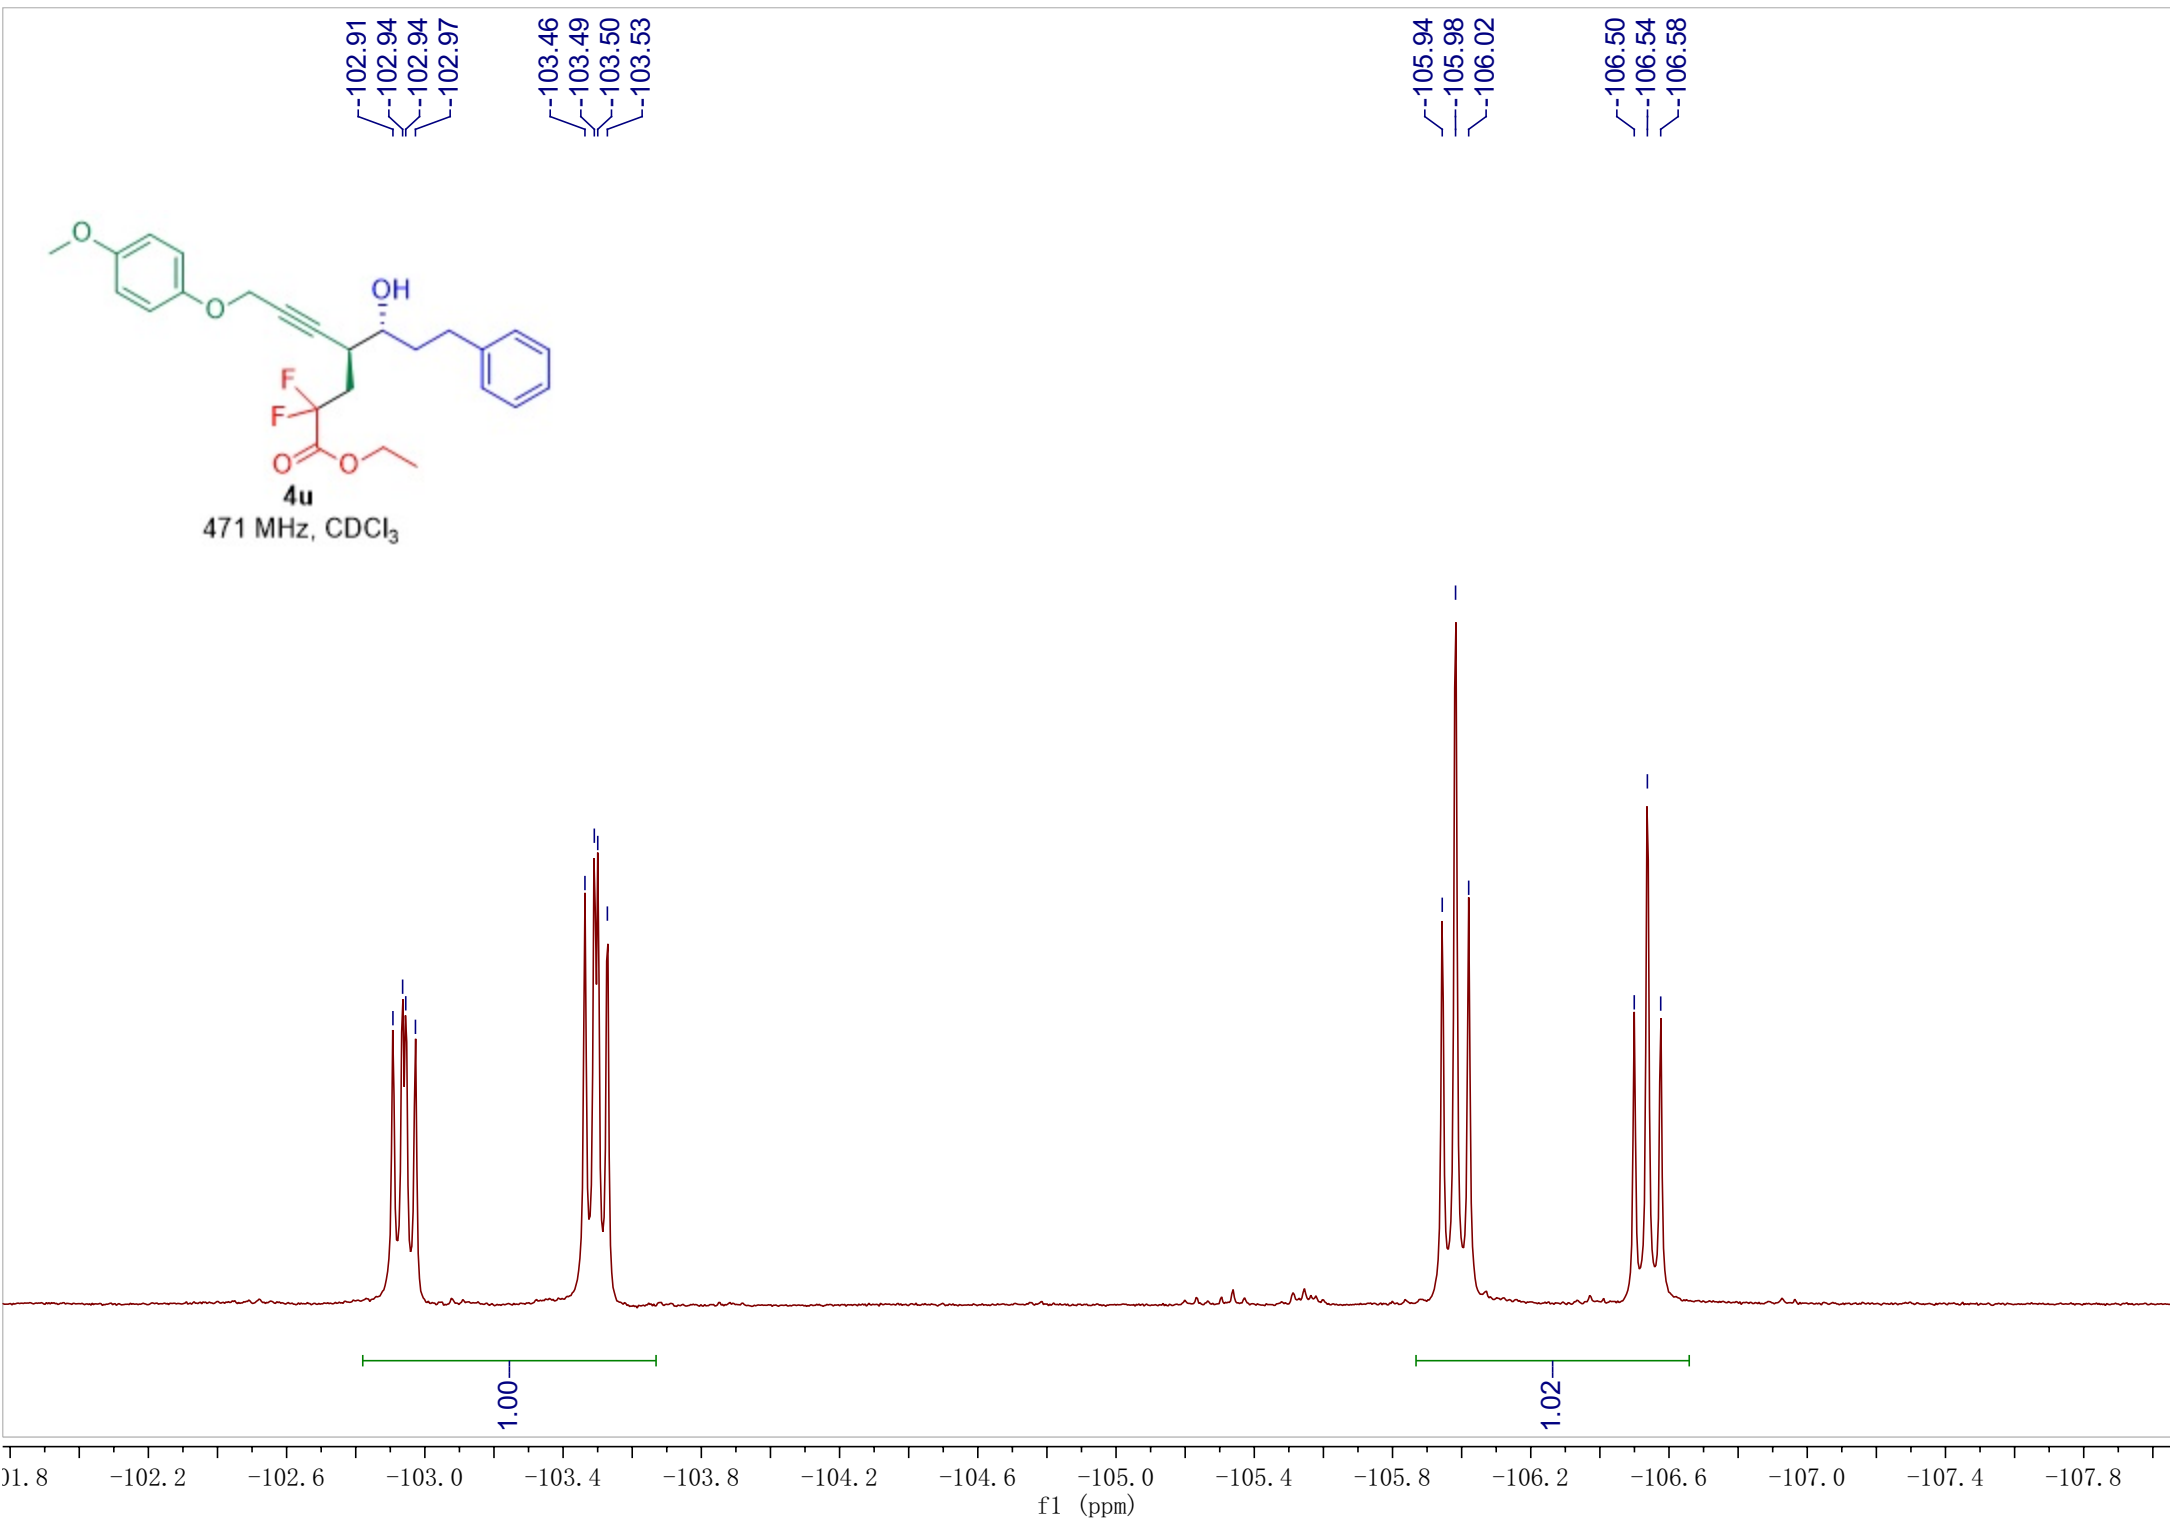

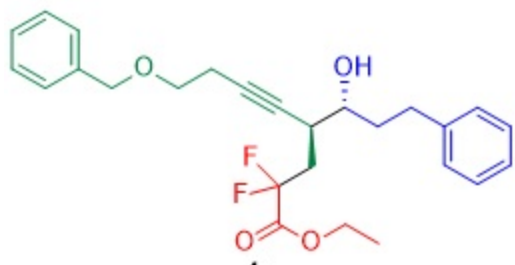

4v  
500 MHz, CDCl<sub>3</sub>

7.34  
7.33  
7.30  
7.28  
7.27  
7.26 CDCl<sub>3</sub>  
7.21  
7.20  
7.18

4.53  
4.31  
4.29  
4.28  
4.26  
3.57  
3.56  
3.55  
3.52  
2.77  
2.67  
2.50  
2.48  
2.47  
1.93  
1.88  
1.83  
1.34  
1.33  
1.32

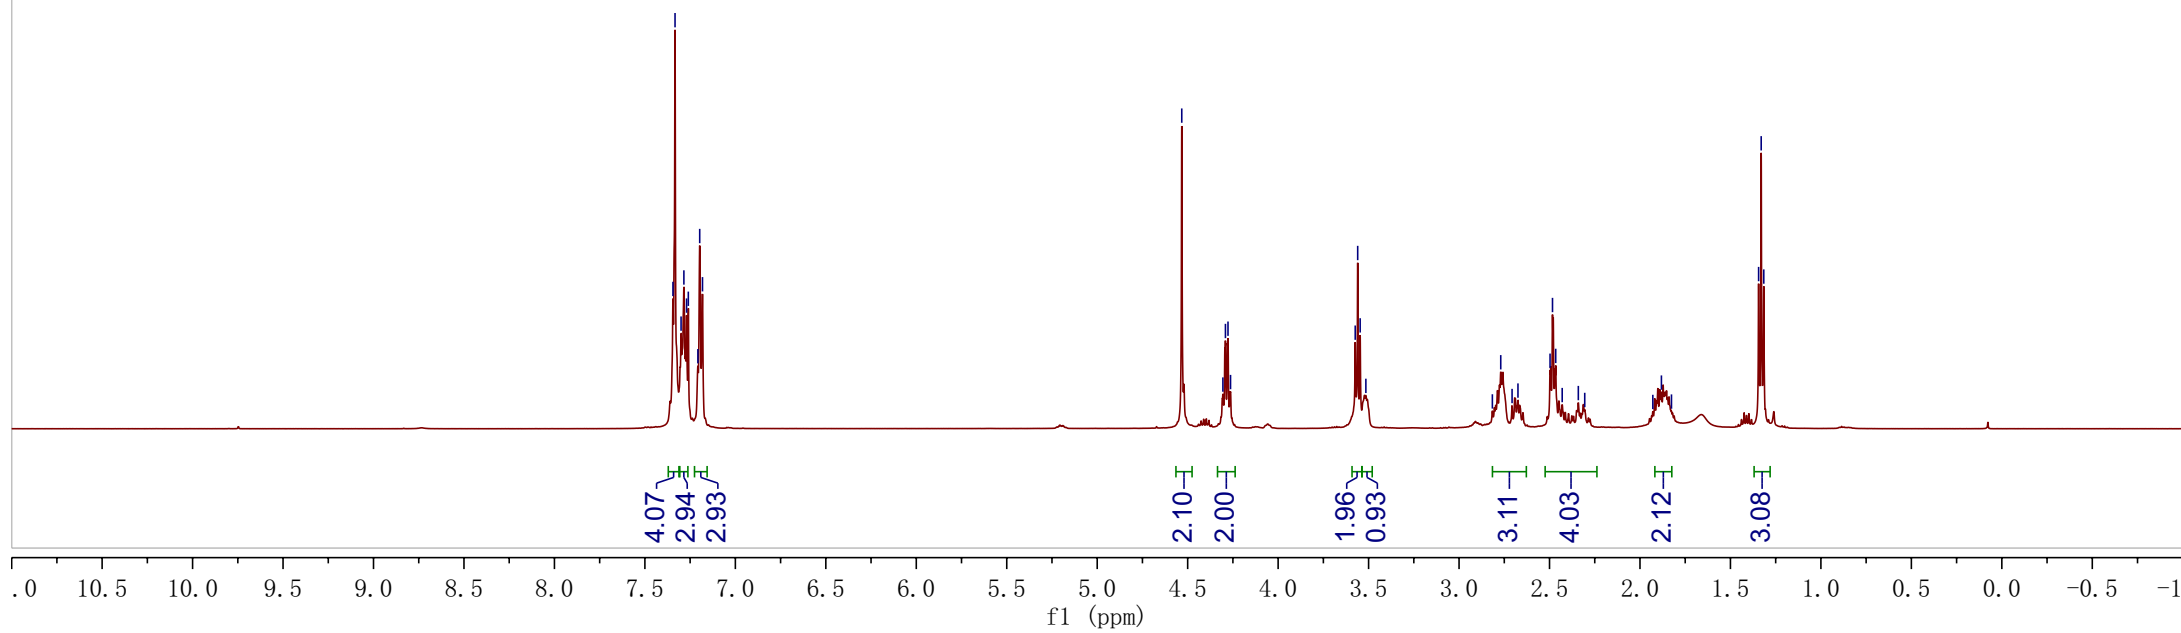

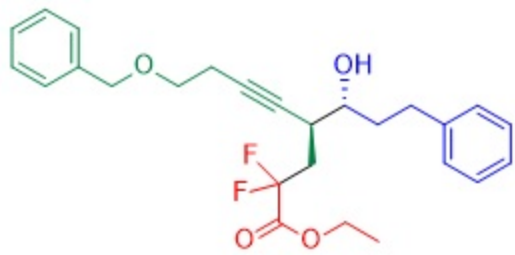

4v  
126 MHz, CDCl<sub>3</sub>

164.15  
163.89  
163.63

141.56  
137.89

128.42  
128.41  
127.74  
127.70  
115.58  
115.56  
113.58

82.24  
78.10  
77.25  
77.00 CDCl<sub>3</sub>  
76.75  
72.99  
72.44  
68.39  
62.85

37.32  
37.17  
37.13  
36.95  
32.68  
32.66  
32.62  
32.01  
20.13  
13.88

A (t)  
163.89  
H

B (dd)  
115.57  
H

D (t)  
37.13  
H

C (m)  
32.66  
H

210 200 190 180 170 160 150 140 130 120 110 100 90 80 70 60 50 40 30 20 10 0 -10  
f1 (ppm)



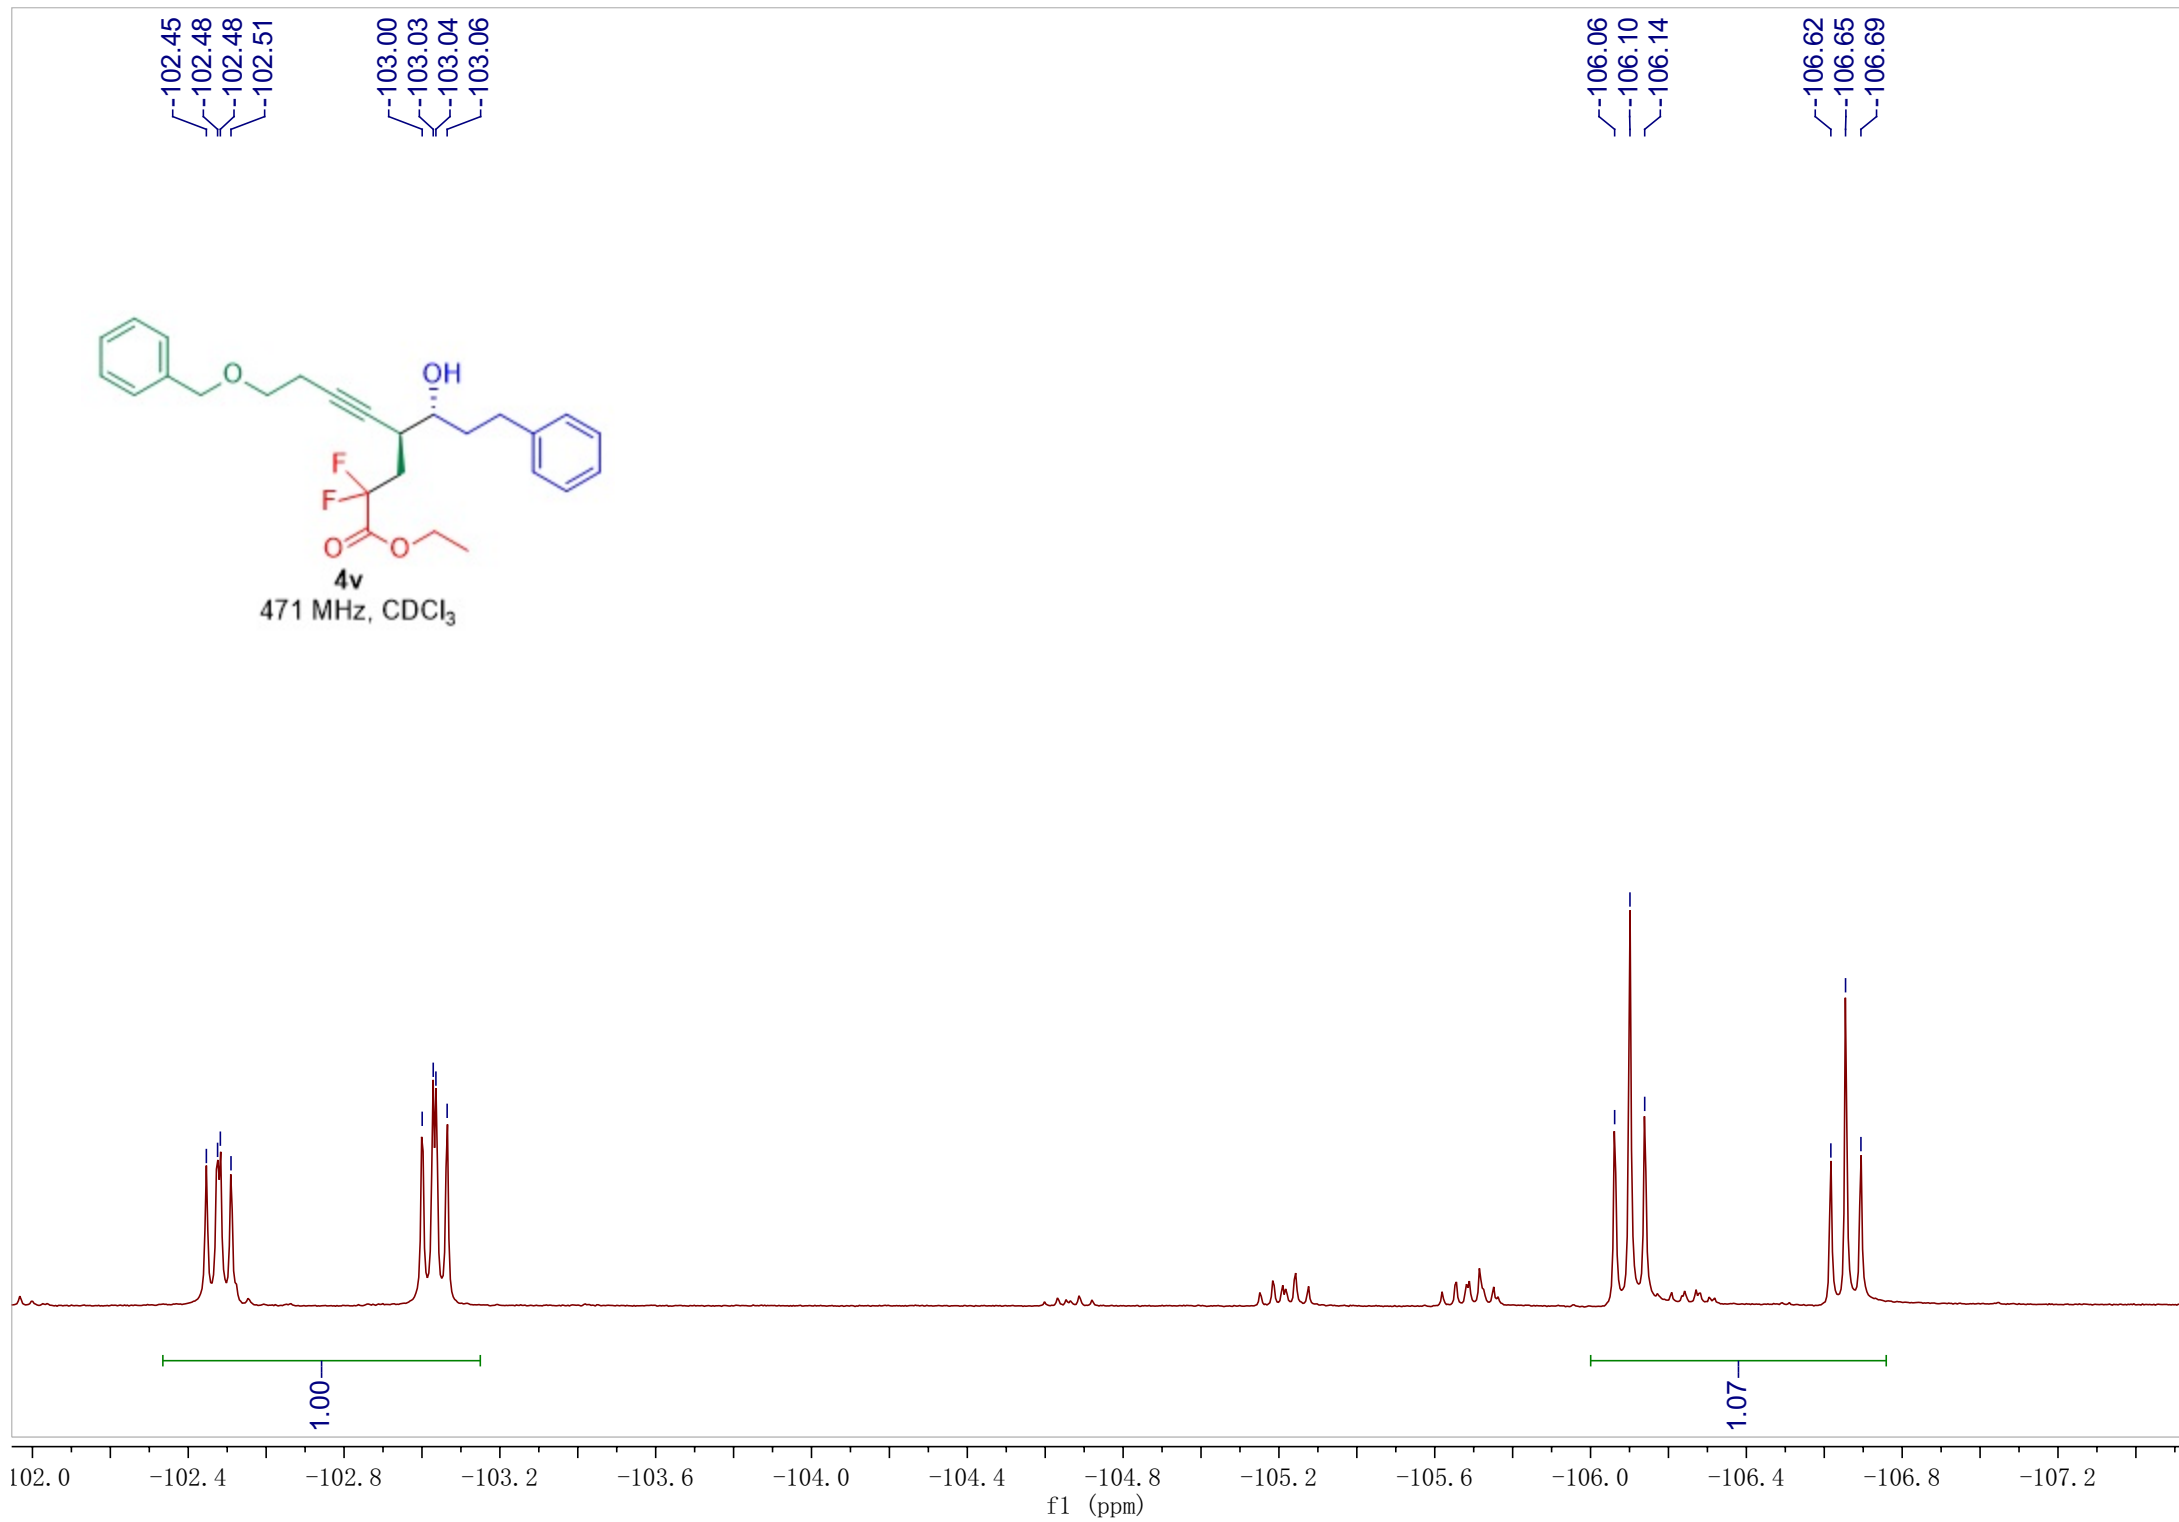

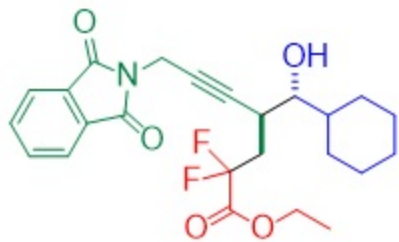

**4w**  
500 MHz, CDCl<sub>3</sub>

7.89  
7.88  
7.88  
7.87  
7.75  
7.75  
7.74  
— 7.26 CDCl<sub>3</sub>

4.43  
4.43  
4.33  
4.31  
4.30  
4.29

3.15  
3.13  
2.92  
2.52  
2.47  
2.45  
2.34  
2.31  
2.28  
2.02  
2.00  
1.70  
1.65  
1.61  
1.47  
1.43  
1.35  
1.34  
1.32  
1.13  
1.12  
1.00  
0.97  
0.92  
0.90

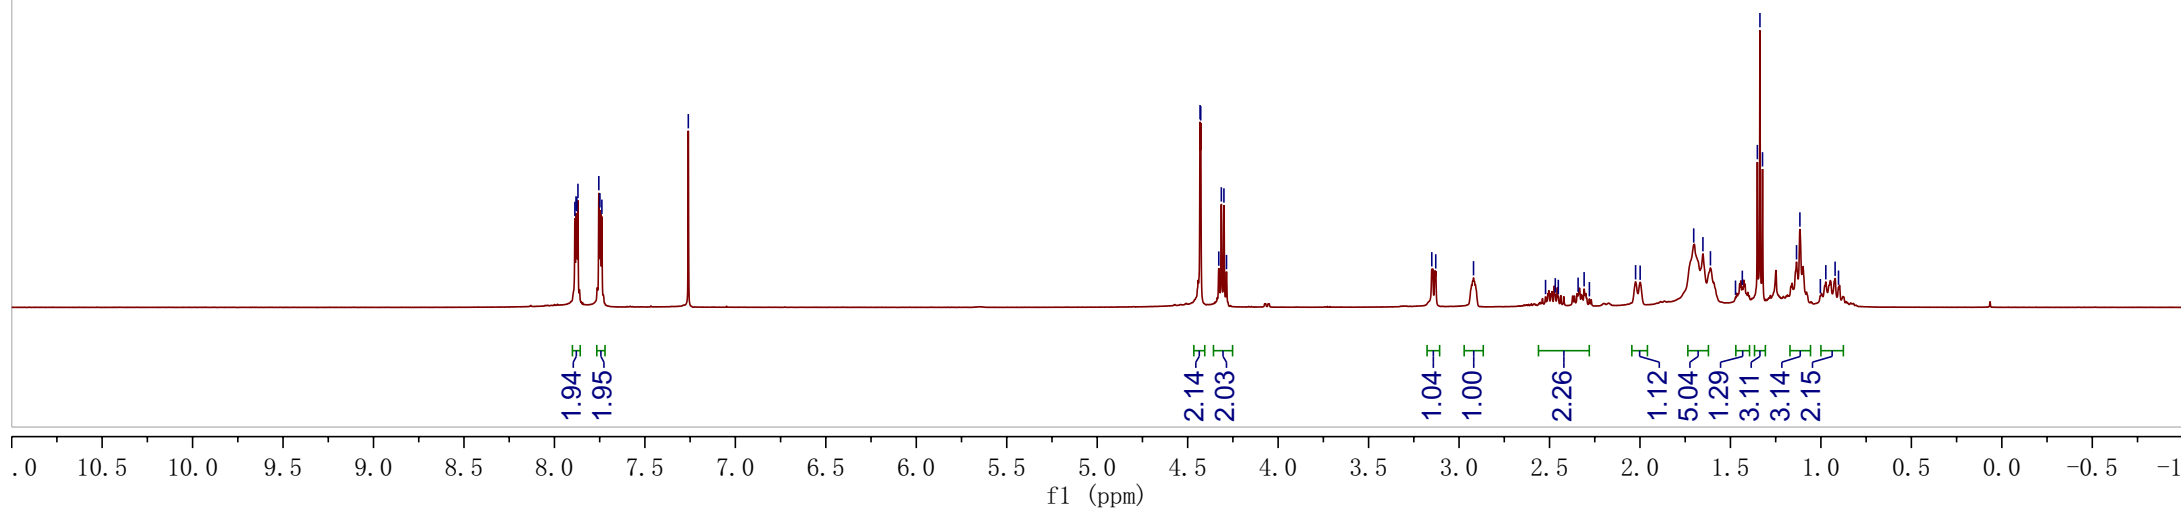

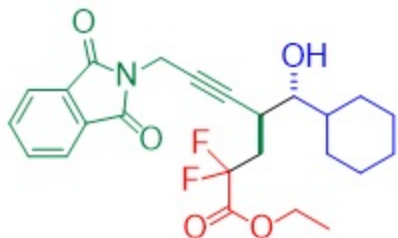

**4w**  
126 MHz, CDCl<sub>3</sub>

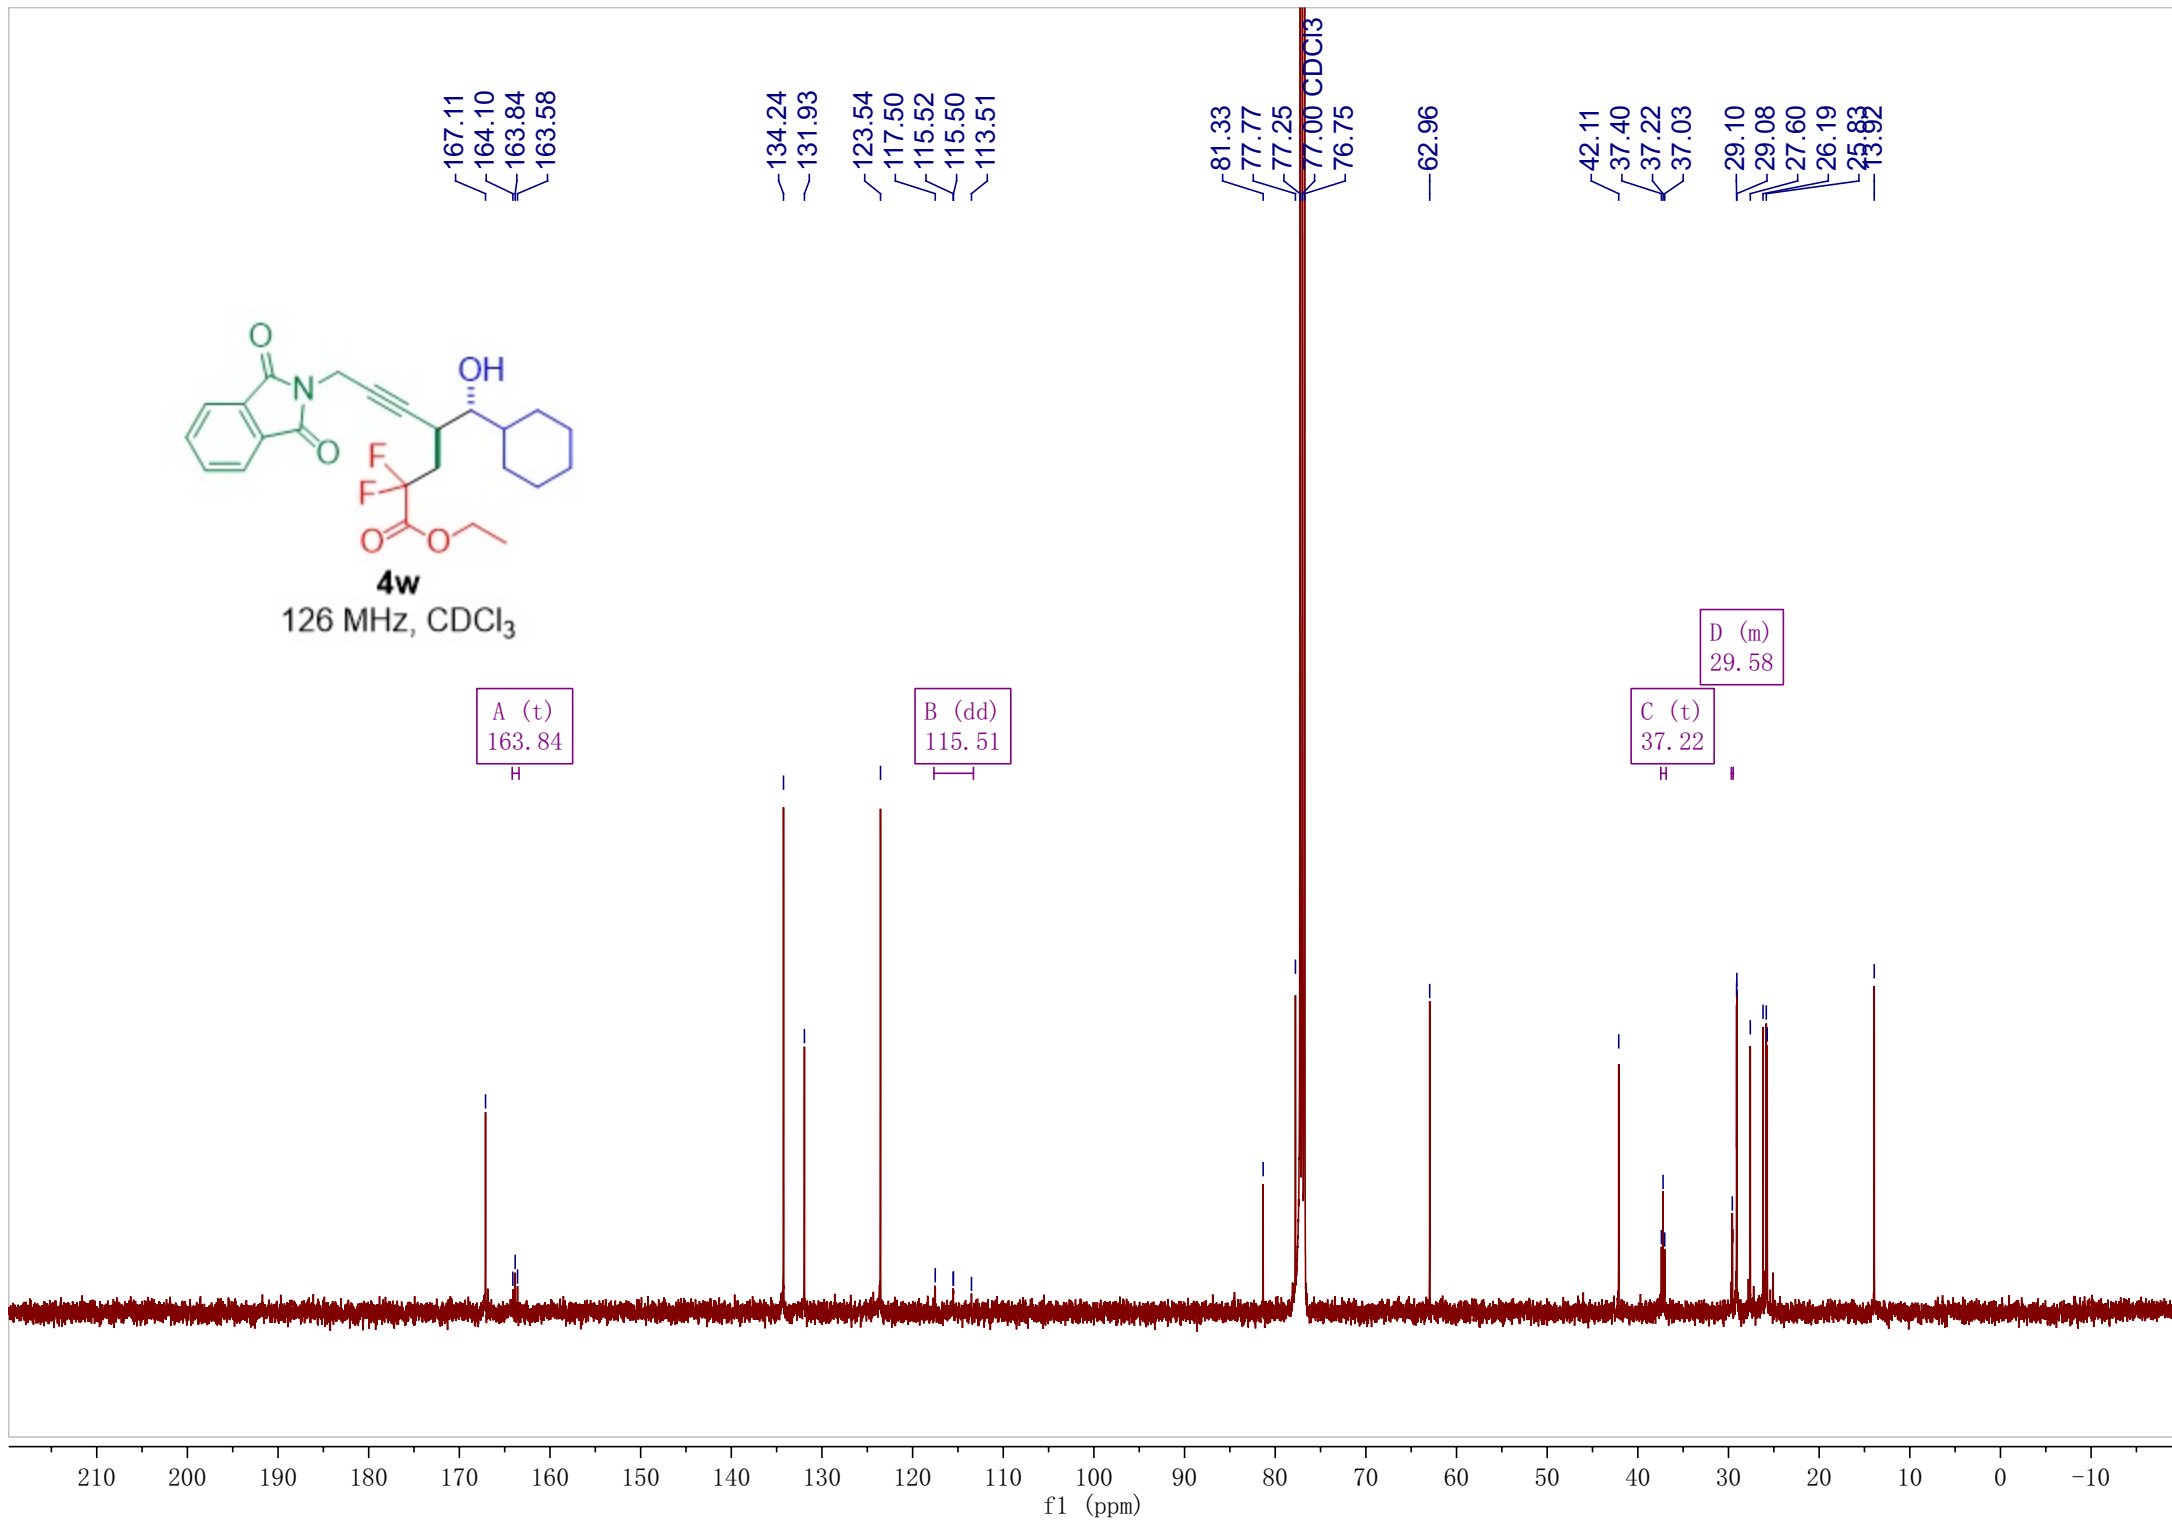

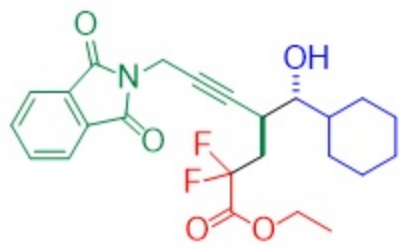

**4w**  
471 MHz, CDCl<sub>3</sub>

102.78  
102.80  
102.84  
103.33  
103.36  
103.40

106.05  
106.09  
106.12  
106.60  
106.64  
106.68

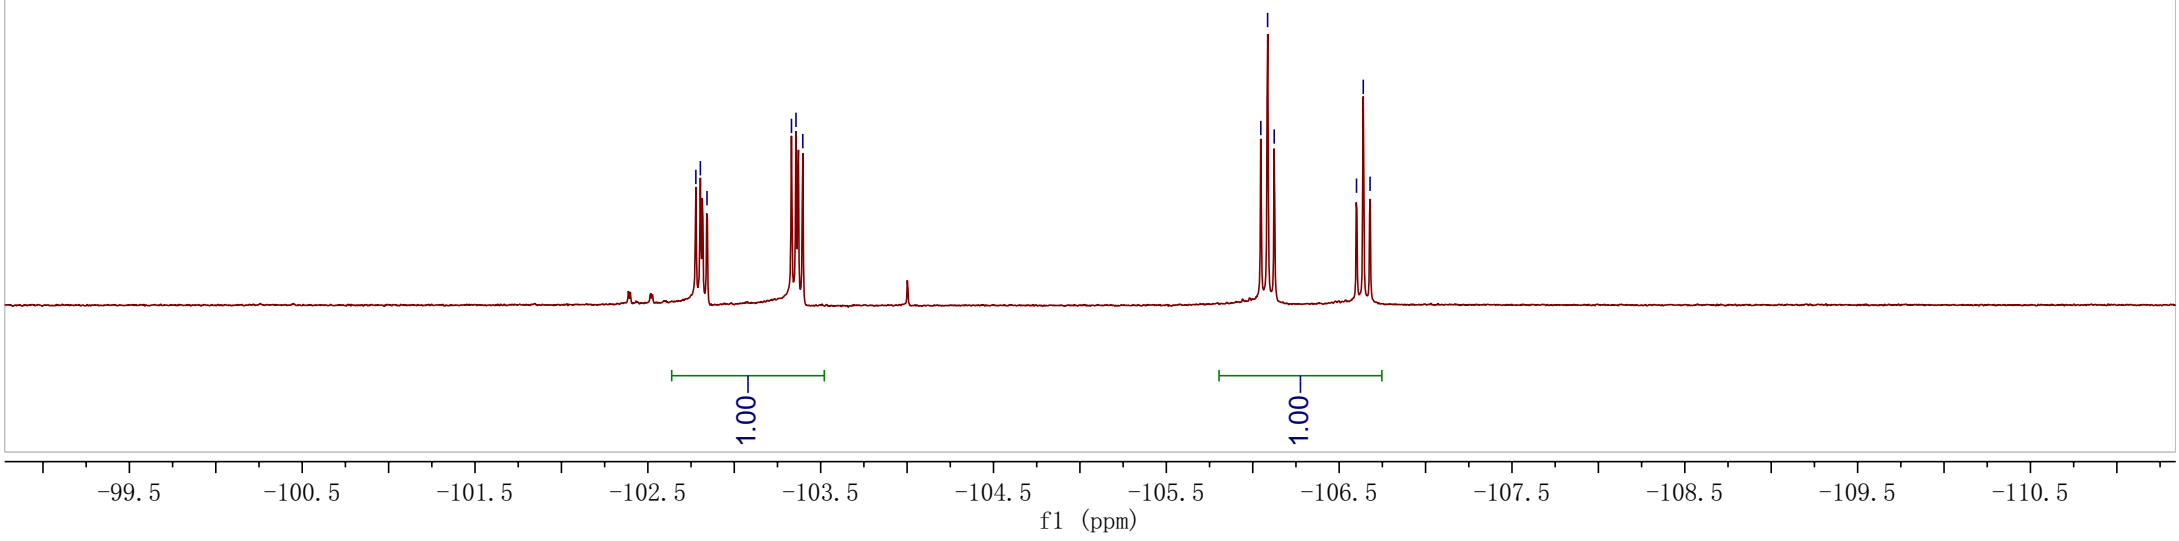

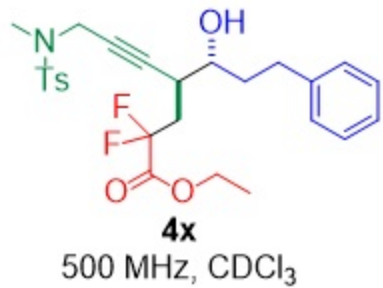

7.69  
7.67  
7.31  
7.30  
7.28  
7.27  
7.26 CDCl<sub>3</sub>  
7.25  
7.22  
7.21  
7.19  
7.17  
7.16

4.33  
4.31  
4.30  
4.28  
4.05  
4.01  
4.00  
3.96  
3.45  
3.43

2.79  
2.74  
2.62  
2.61  
2.40  
2.24  
2.21  
1.74  
1.71  
1.66  
1.62  
1.36  
1.35  
1.33

2.16  
2.17  
2.34  
1.05  
2.03

2.15  
2.22

1.00

3.04  
1.24  
1.95  
3.04  
2.05

3.17

3.15

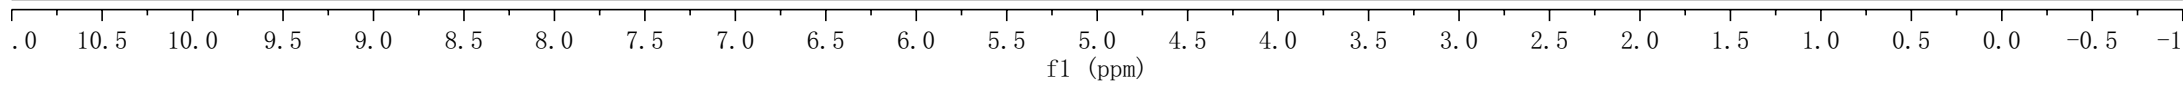

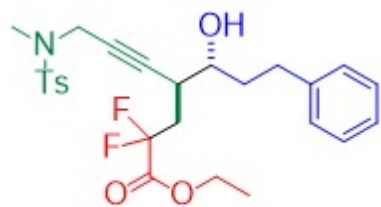

**4x**

126 MHz, CDCl<sub>3</sub>

A (t)  
163.73  
H

B (dd)  
115.28  
H

C (t)  
36.37  
H

D (m)  
32.31  
H

163.99  
163.73  
163.47

143.79  
141.26

129.60  
128.50  
128.34  
127.86  
126.97  
117.27  
115.31  
115.27  
113.27

83.24  
77.25  
77.00 CDCl<sub>3</sub>  
76.75  
72.08

63.05

39.95  
36.98  
36.55  
36.37  
36.19  
34.43  
32.31  
31.95  
21.46

13.91

210 200 190 180 170 160 150 140 130 120 110 100 90 80 70 60 50 40 30 20 10 0 -10

f1 (ppm)

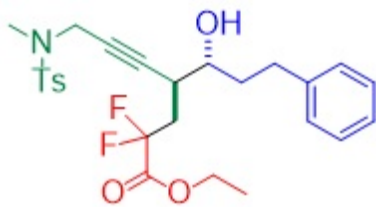

**4x**  
471 MHz, CDCl<sub>3</sub>

104.06  
104.10  
104.13  
104.62  
104.65  
105.29  
105.33  
105.81  
105.84  
105.88

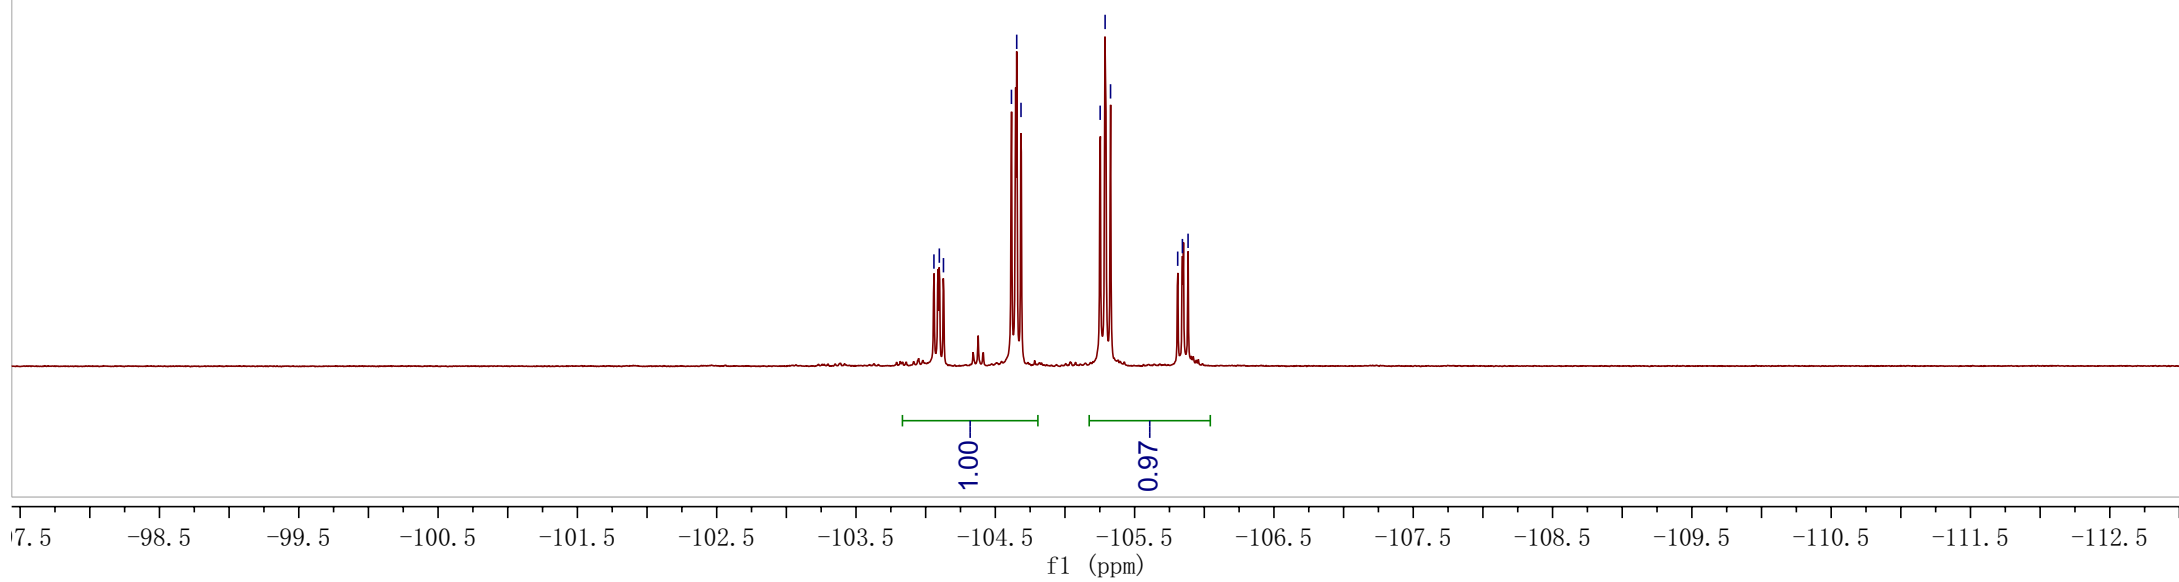

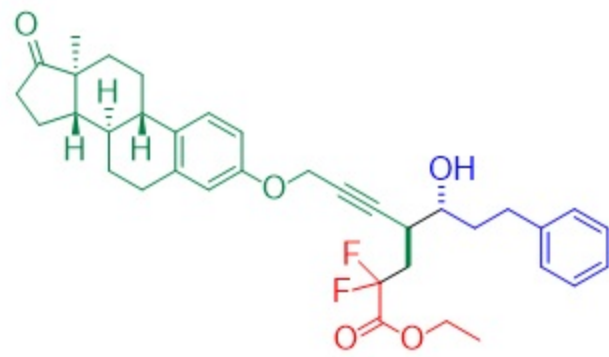

**4y**  
500 MHz, CDCl<sub>3</sub>

7.34  
7.33  
7.31  
7.26 CDCl<sub>3</sub>  
7.25  
7.23  
7.21  
7.19  
6.82  
6.82  
6.80  
6.80  
6.75  
6.74

4.71  
4.71  
4.38  
4.36  
4.35  
4.34

—3.61

2.92  
2.91  
2.53  
2.43  
2.22  
2.18  
2.01  
1.89  
1.87  
1.54  
1.52  
1.41  
1.40  
1.38

2.25  
2.09  
1.94

1.02  
0.96

2.00

2.11

1.00

3.15  
1.05  
1.10  
2.09  
2.20  
1.10  
1.10  
1.09  
2.10  
2.07  
1.17  
6.99  
3.14  
3.15

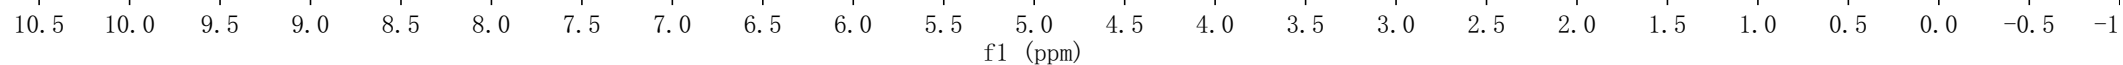



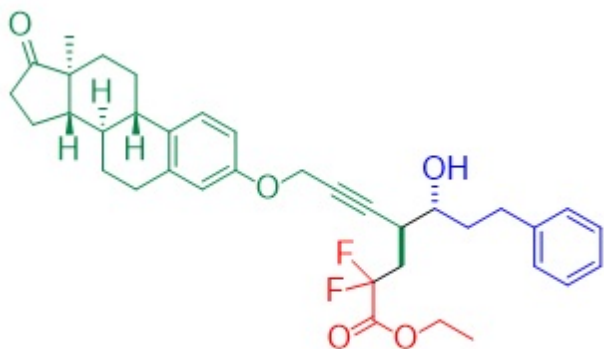

**4y**

126 MHz, CDCl<sub>3</sub>

A (t)  
163.75  
H

B (m)  
115.38  
H

C (t)  
36.55  
H

D (m)  
32.53  
H

- 164.01
- 163.75
- 163.50
- 155.40
- 141.25
- 137.83
- 132.94
- 128.39
- 128.32
- 128.31
- 126.32
- 125.95
- 117.38
- 115.44
- 115.37
- 115.10
- 115.05
- 113.38
- 112.62
- 112.59

- 84.63
- 79.93
- 77.25
- 77.00 CDCl<sub>3</sub>
- 76.75
- 72.32

- 62.96
- 56.06
- 50.30
- 47.93
- 43.88
- 38.19
- 36.84
- 35.81
- 31.95
- 31.48
- 29.54
- 26.43
- 25.82
- 21.51
- 13.86
- 13.77

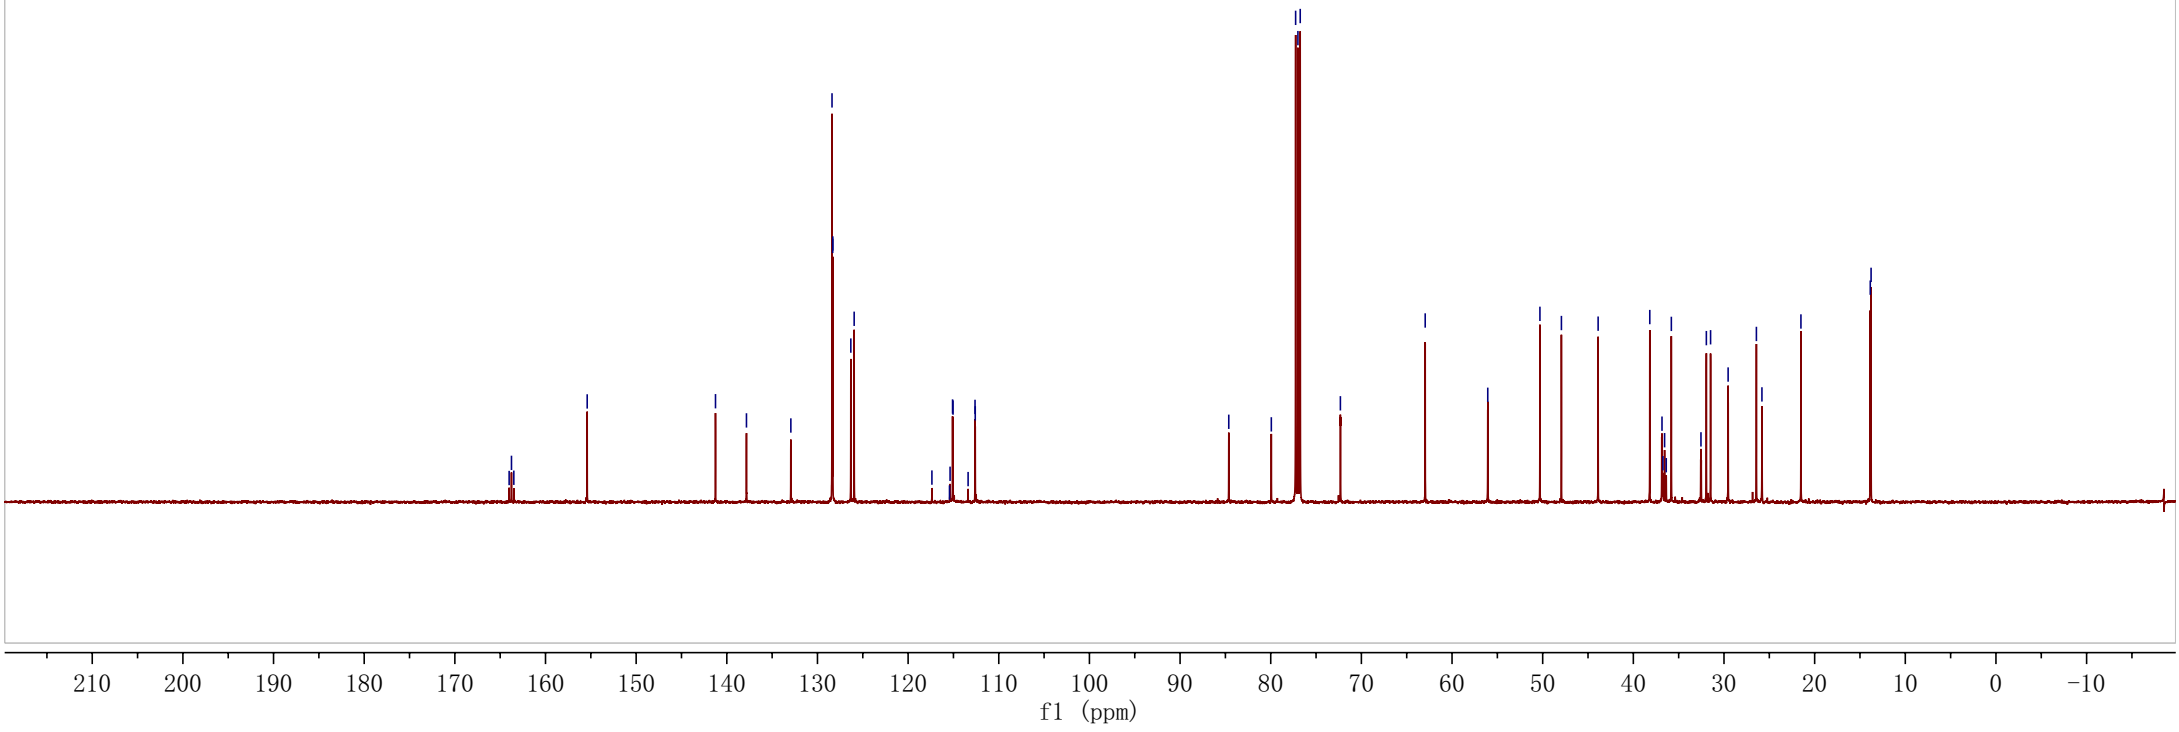

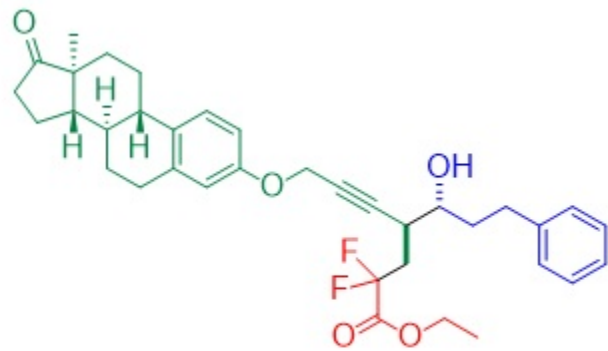

**4y**  
471 MHz, CDCl<sub>3</sub>

102.87  
103.43  
105.94  
105.98  
106.03  
106.49  
106.53  
106.58

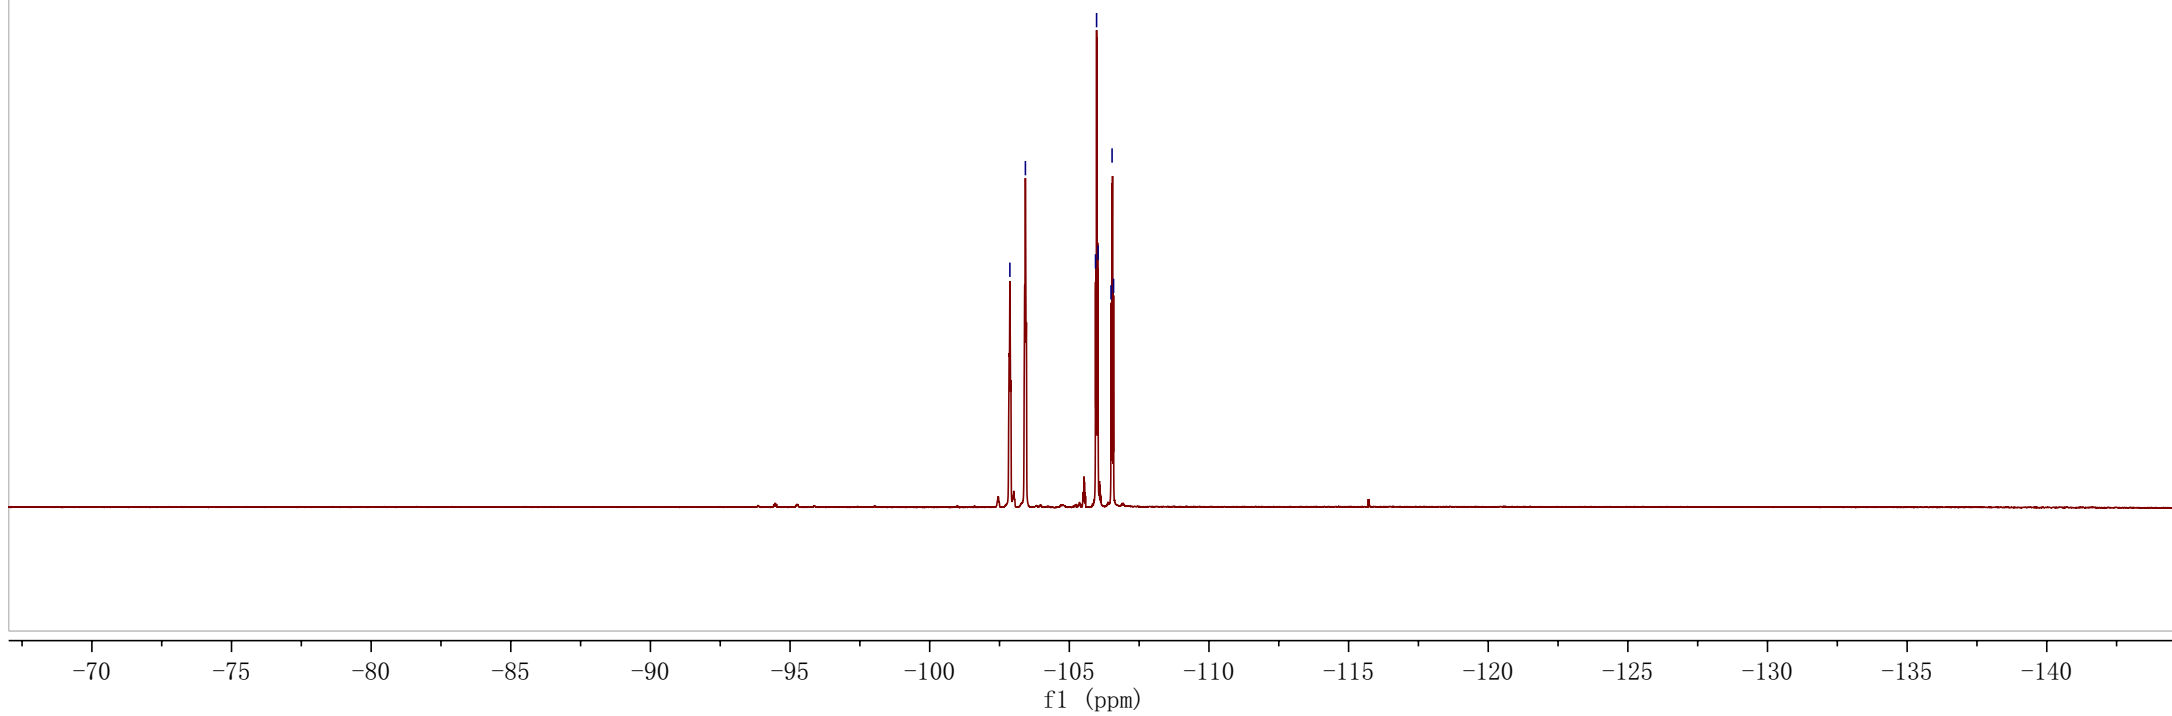

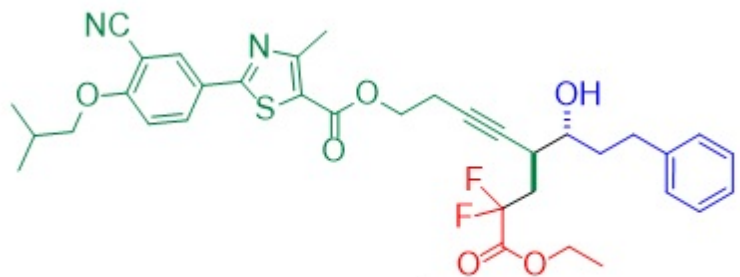

**4z**  
500 MHz, CDCl<sub>3</sub>

8.25  
8.24  
8.16  
8.15  
8.14  
8.13  
7.34  
7.32  
7.31  
7.26 CDCl<sub>3</sub>  
7.09  
7.07

4.49  
4.48  
4.46  
4.40  
4.39  
4.37  
4.36  
3.98  
3.97  
— 3.61  
2.88  
2.85  
2.84  
2.82  
2.76  
2.74  
2.72  
2.70  
2.29  
1.98  
1.92  
1.43  
1.42  
1.40  
1.18  
1.16

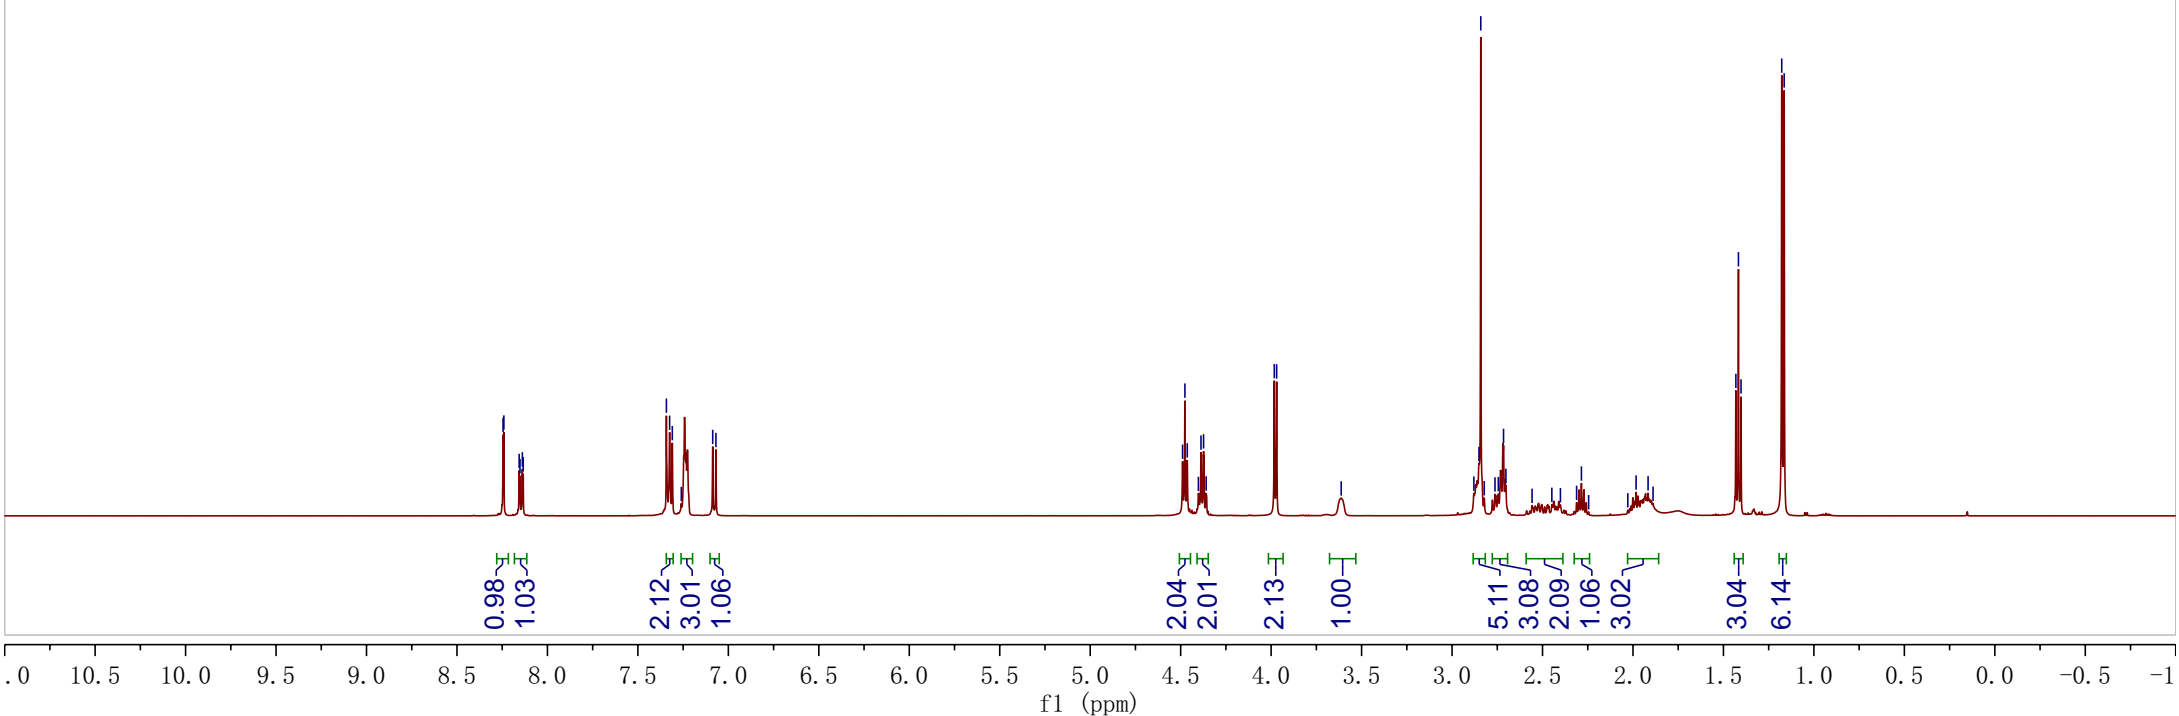

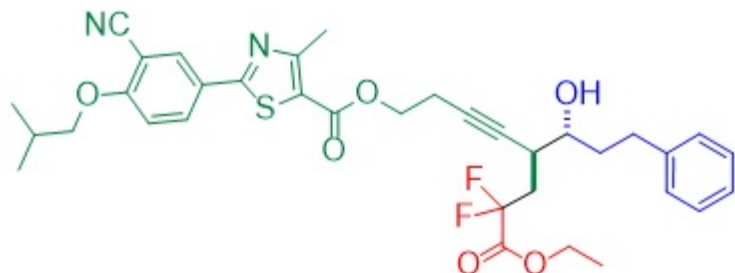

**4z**

126 MHz, CDCl<sub>3</sub>

167.57  
164.11  
163.85  
163.59  
162.52  
161.86  
161.78

141.36  
132.58  
132.09  
128.41  
128.30  
125.93  
125.83  
121.11  
115.48  
115.33  
102.59

80.60  
79.02  
77.25  
77.00 CDCl<sub>3</sub>  
76.75  
75.65  
72.40  
62.99  
62.91

37.19  
37.14  
37.00  
36.82  
32.48  
31.99  
28.11  
19.59  
19.02  
17.52  
13.91

A (t)  
163.85  
H

B (dd)  
115.50  
H

C (t)  
37.00  
H H

D (m)  
32.48

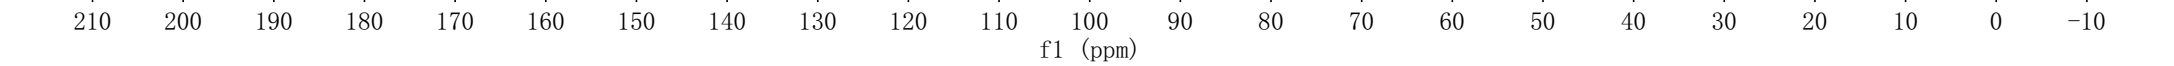

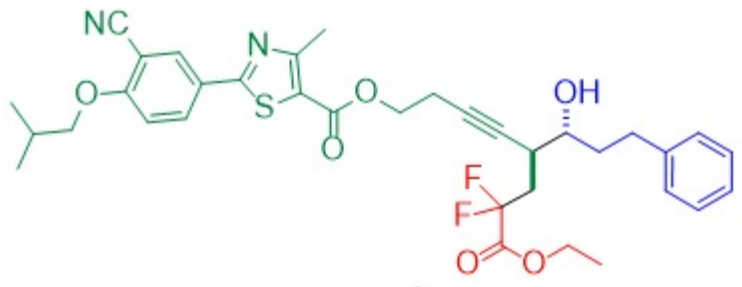

**4z**  
471 MHz, CDCl<sub>3</sub>

103.19  
103.22  
103.26  
103.75  
103.78  
103.81  
105.65  
105.69  
105.73  
106.20  
106.24  
106.28

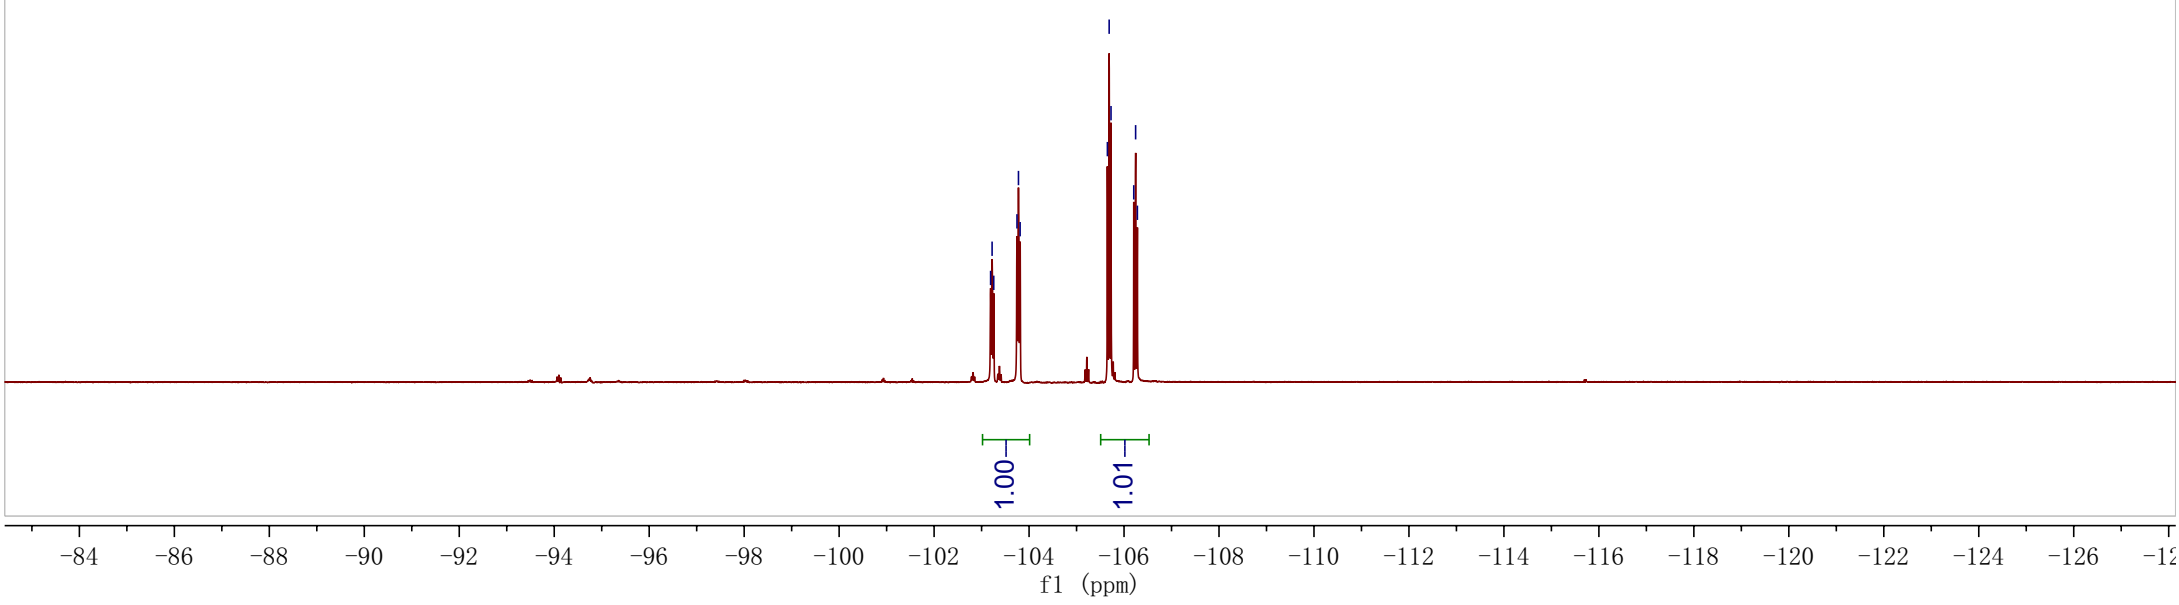

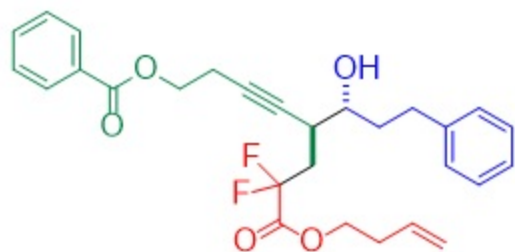

**4aa**  
500 MHz, CDCl<sub>3</sub>

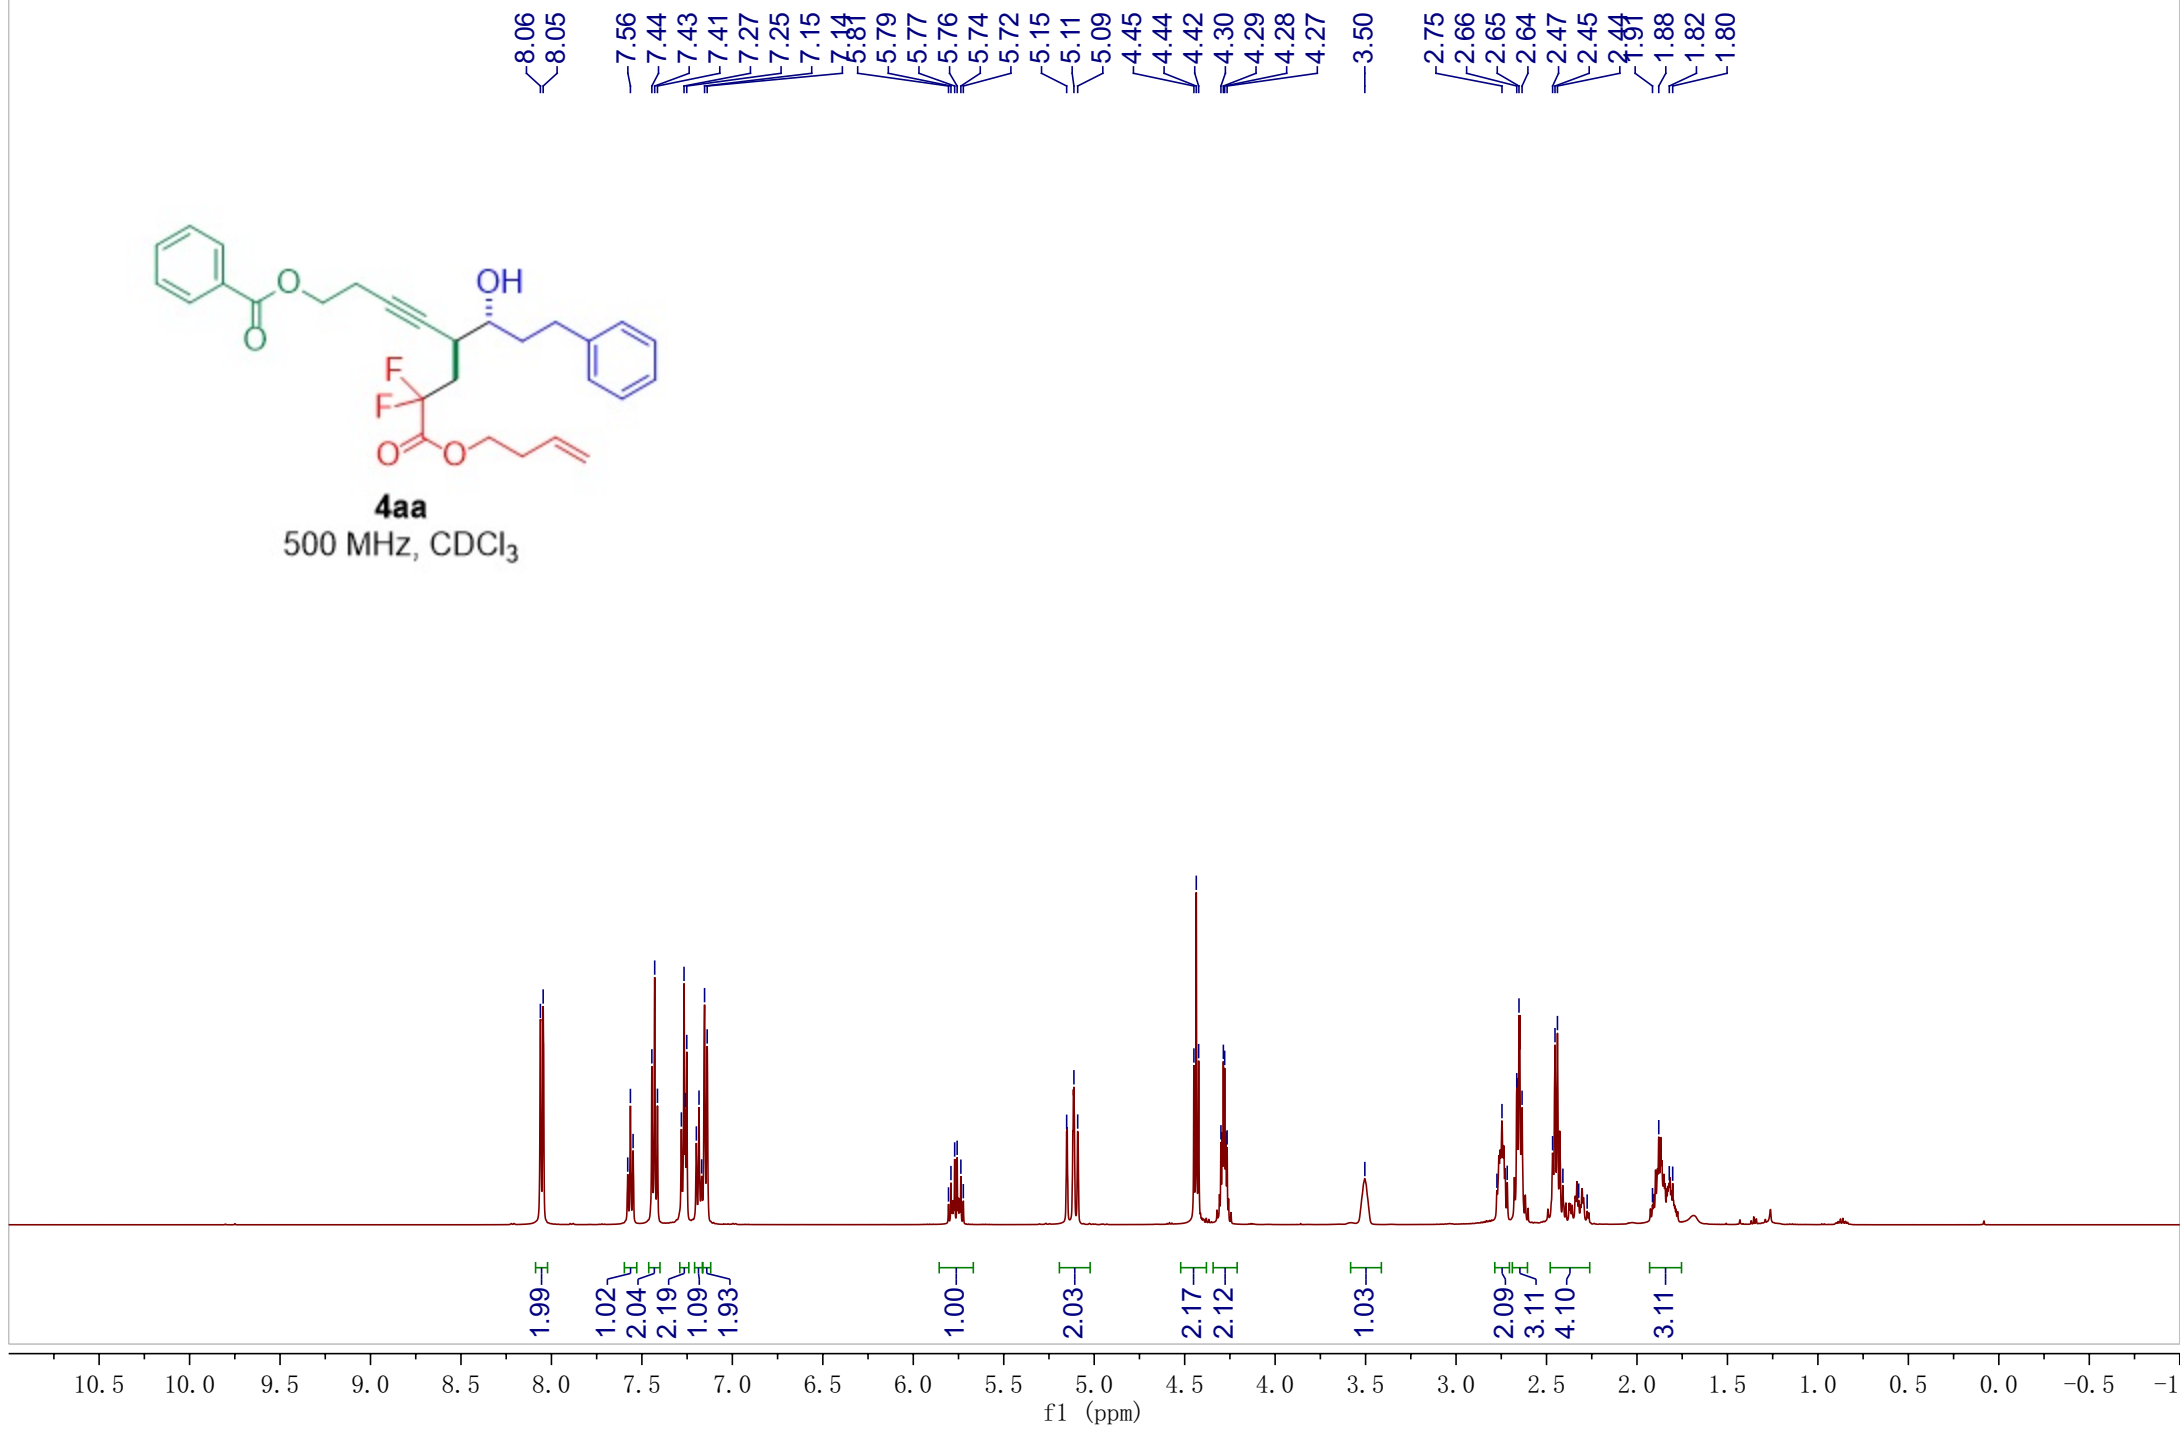

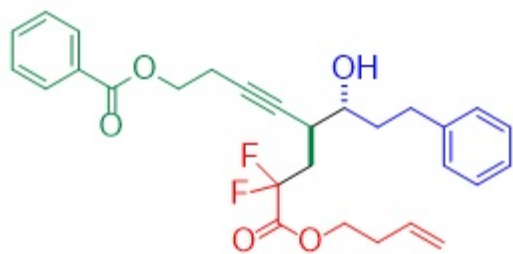

**4aa**  
126 MHz, CDCl<sub>3</sub>

166.48  
164.05  
163.79  
163.53

141.42  
133.15  
129.62  
128.40  
128.35  
125.89  
118.00  
117.50  
115.51  
115.45  
113.51

80.94  
78.79  
77.25  
77.00 CDCl<sub>3</sub>  
76.75  
72.38  
65.61  
62.70

37.23  
37.10  
37.05  
36.87  
32.61  
32.57  
32.54  
32.51  
31.94  
19.60

A (t)  
163.79  
H

B (dd)  
115.49  
H

C (t)  
37.05  
H

D (m)  
32.54

210 200 190 180 170 160 150 140 130 120 110 100 90 80 70 60 50 40 30 20 10 0 -10  
f1 (ppm)

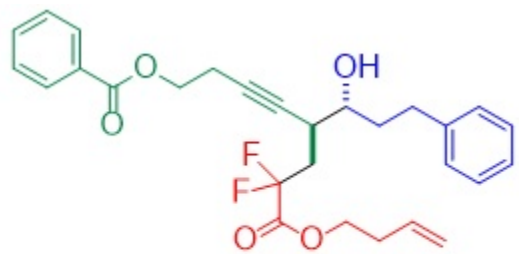

**4aa**

471 MHz, CDCl<sub>3</sub>

102.68  
102.72  
102.76

103.26  
103.27  
103.31

105.66  
105.70  
105.74

106.22  
106.26  
106.29

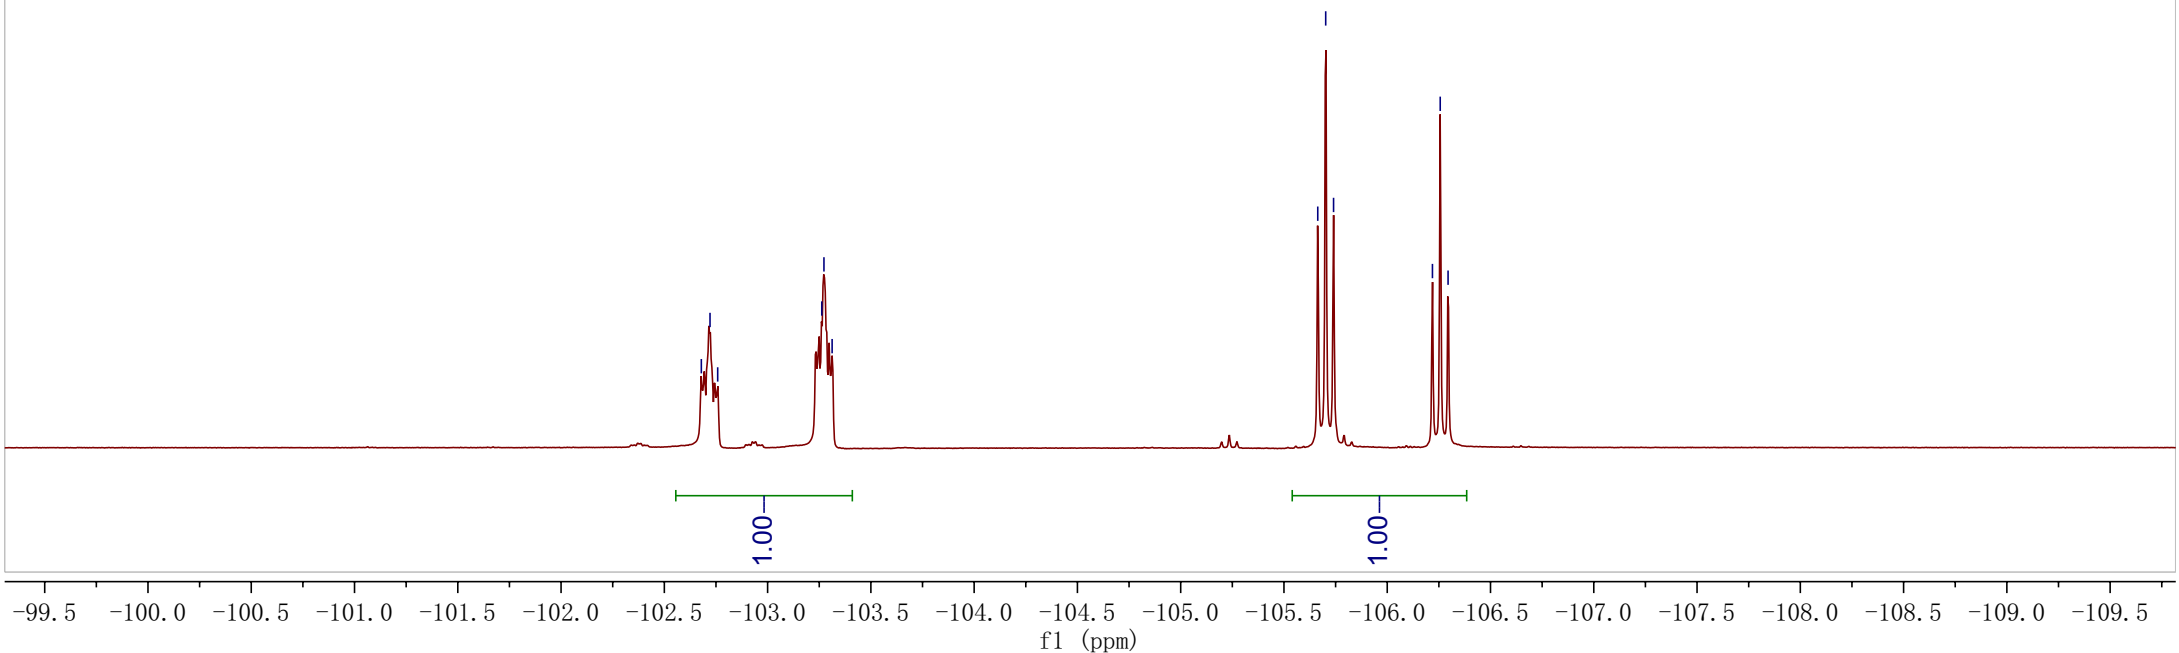



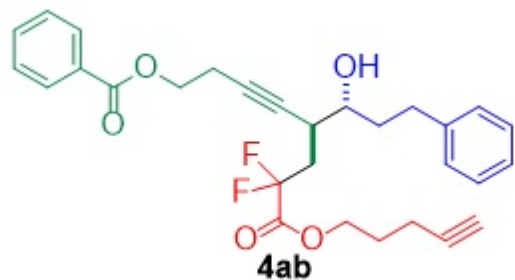

500 MHz, CDCl<sub>3</sub>

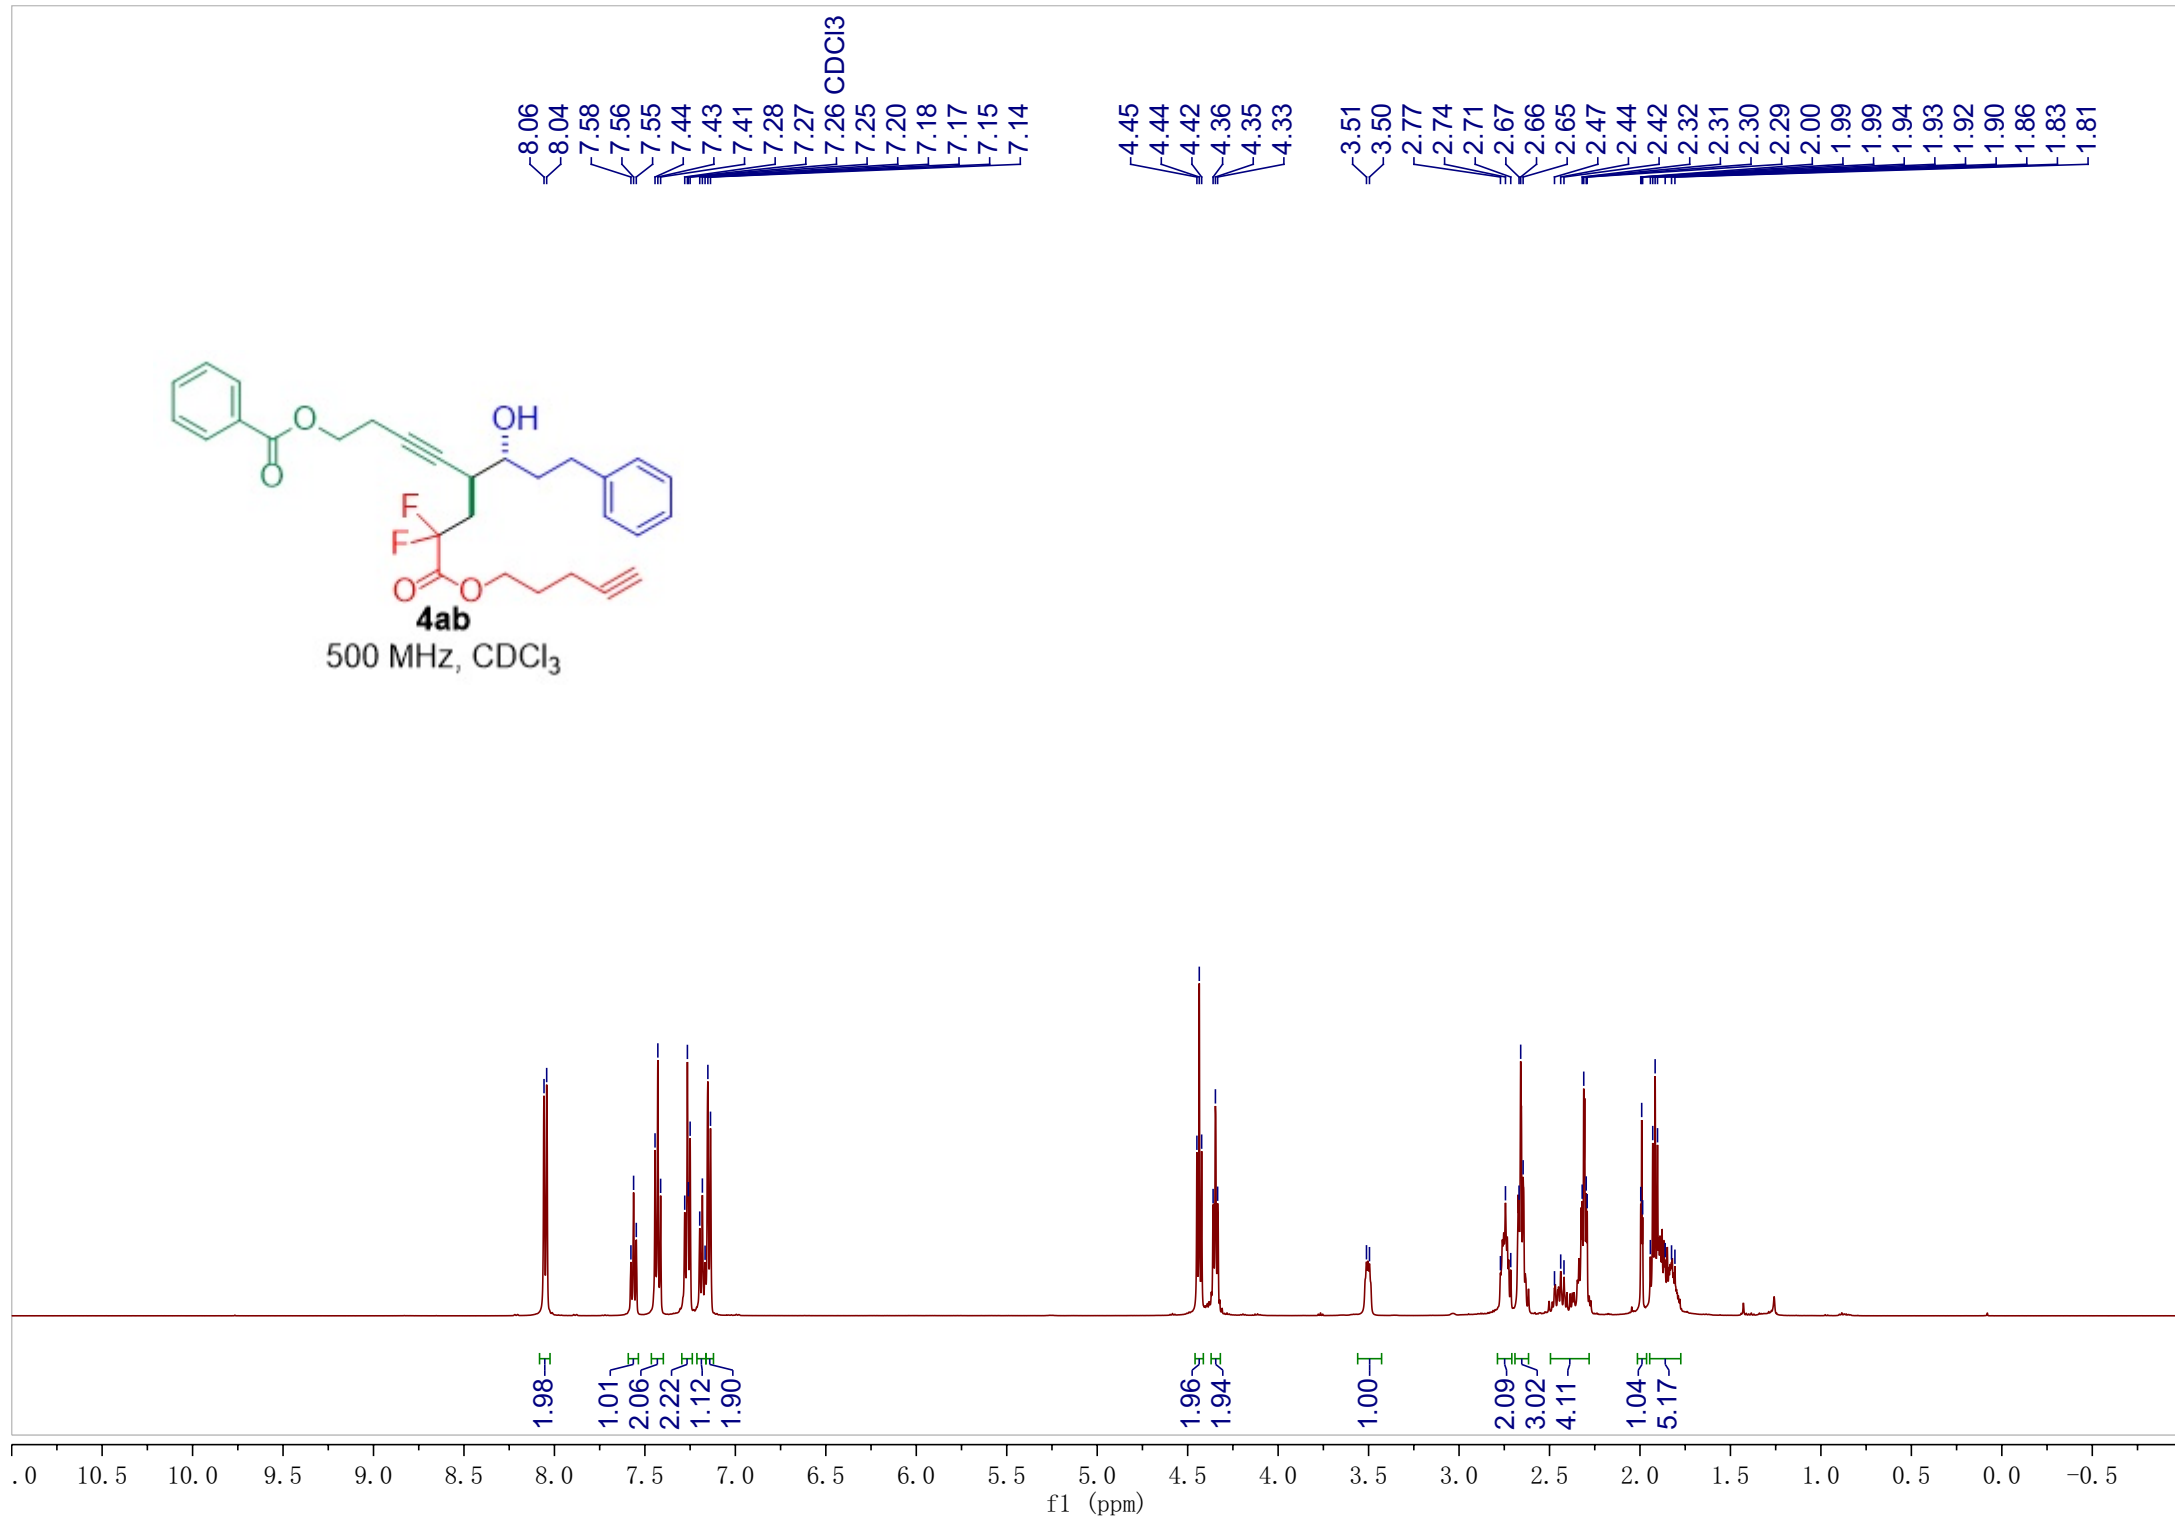

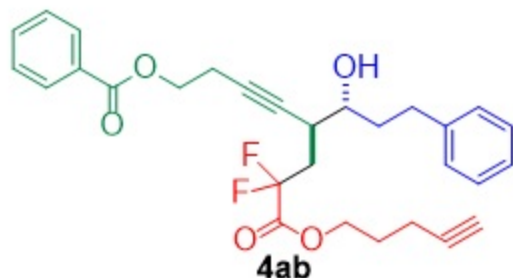

126 MHz, CDCl<sub>3</sub>

166.48  
164.04  
163.78  
163.52

141.40  
133.15  
129.61  
128.40  
128.35  
125.89  
117.51  
115.53  
115.51  
113.52

82.37  
81.00  
78.73  
77.25  
77.00 CDCl<sub>3</sub>  
76.75  
72.37  
69.49  
65.15  
62.69

37.20  
37.05  
37.02  
36.84  
32.54  
32.50  
31.94  
27.02  
19.59  
14.93

A (t)  
163.78  
H

B (dd)  
115.52  
H

D (t)  
37.02  
H

C (m)  
32.52  
H

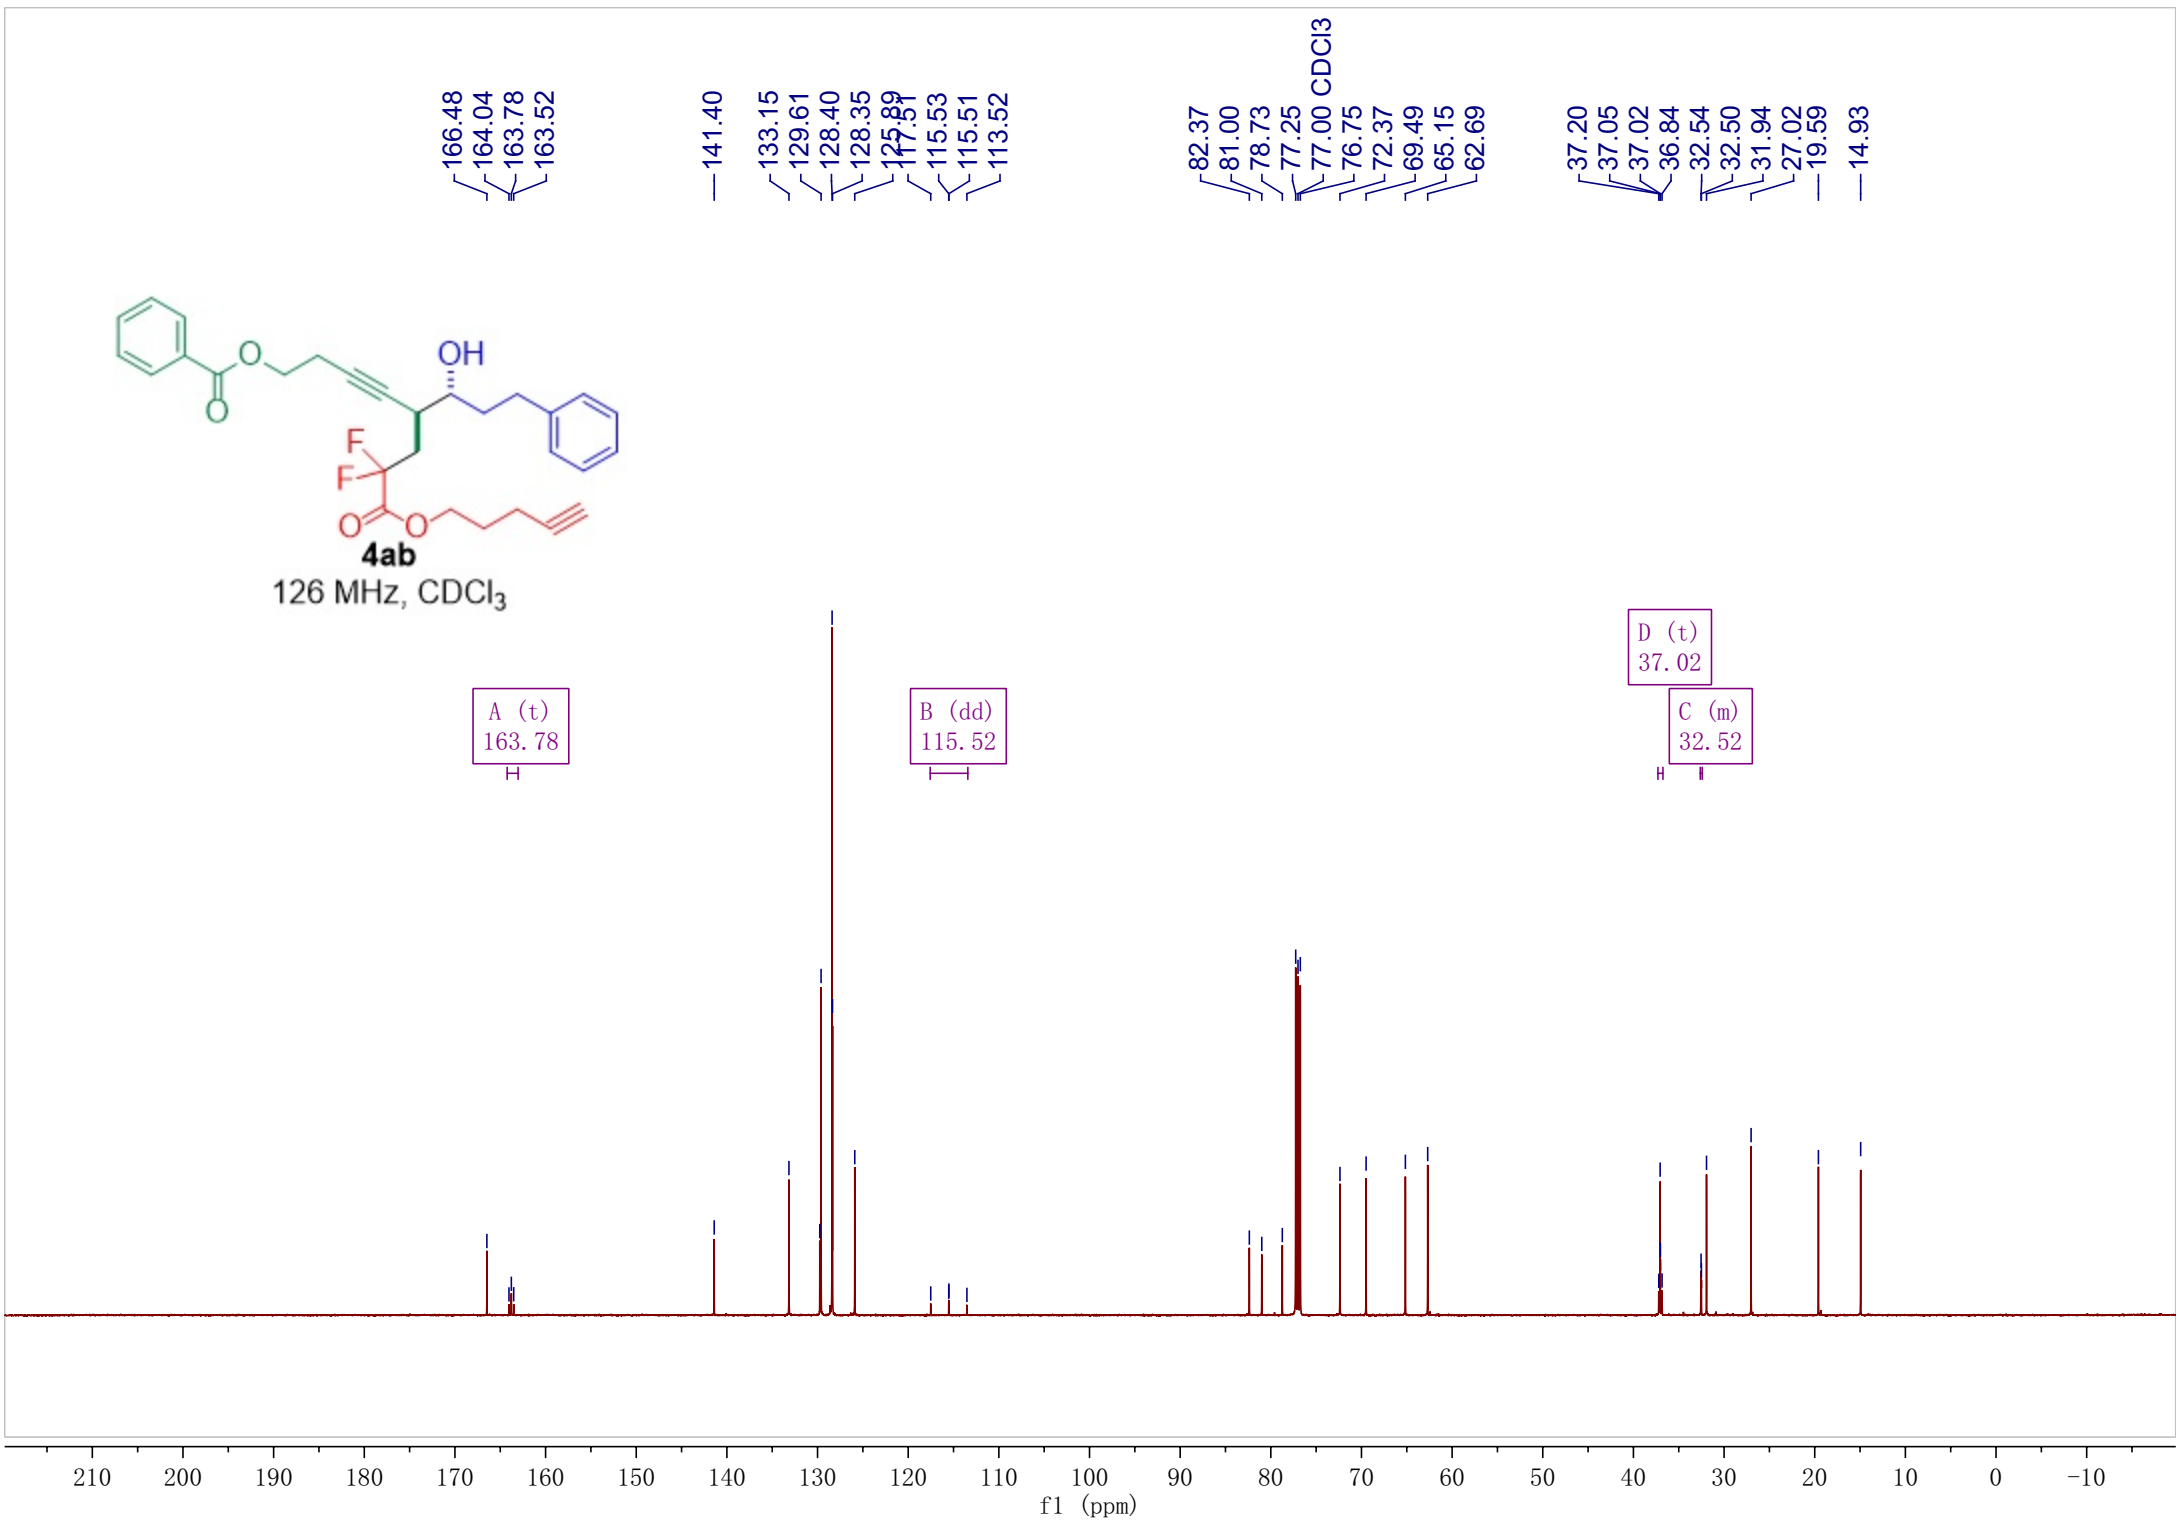

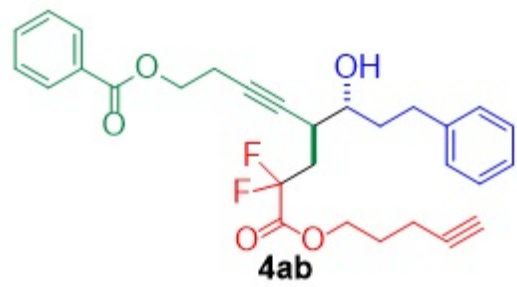

471 MHz, CDCl<sub>3</sub>

102.42  
102.45  
102.46  
102.49  
102.98  
103.01  
103.01  
103.04  
105.66  
105.69  
105.73  
106.21  
106.25  
106.29

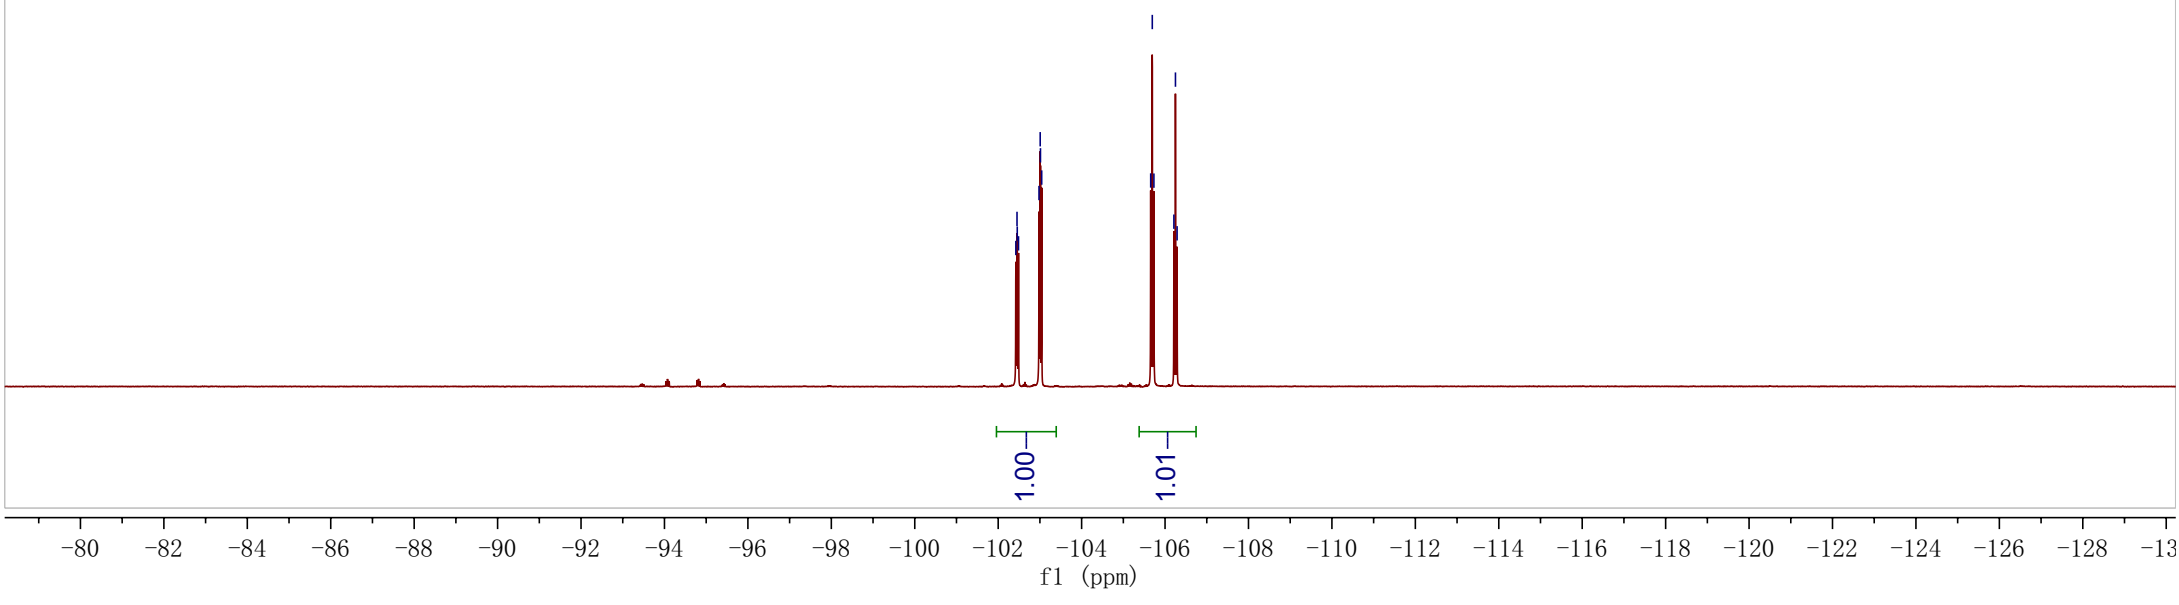

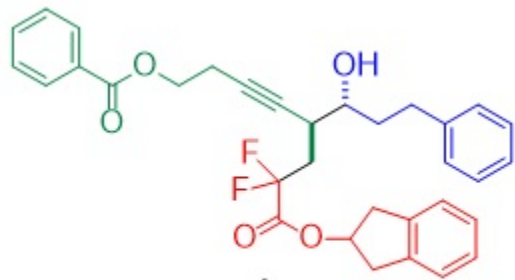

**4ac**  
500 MHz, CDCl<sub>3</sub>

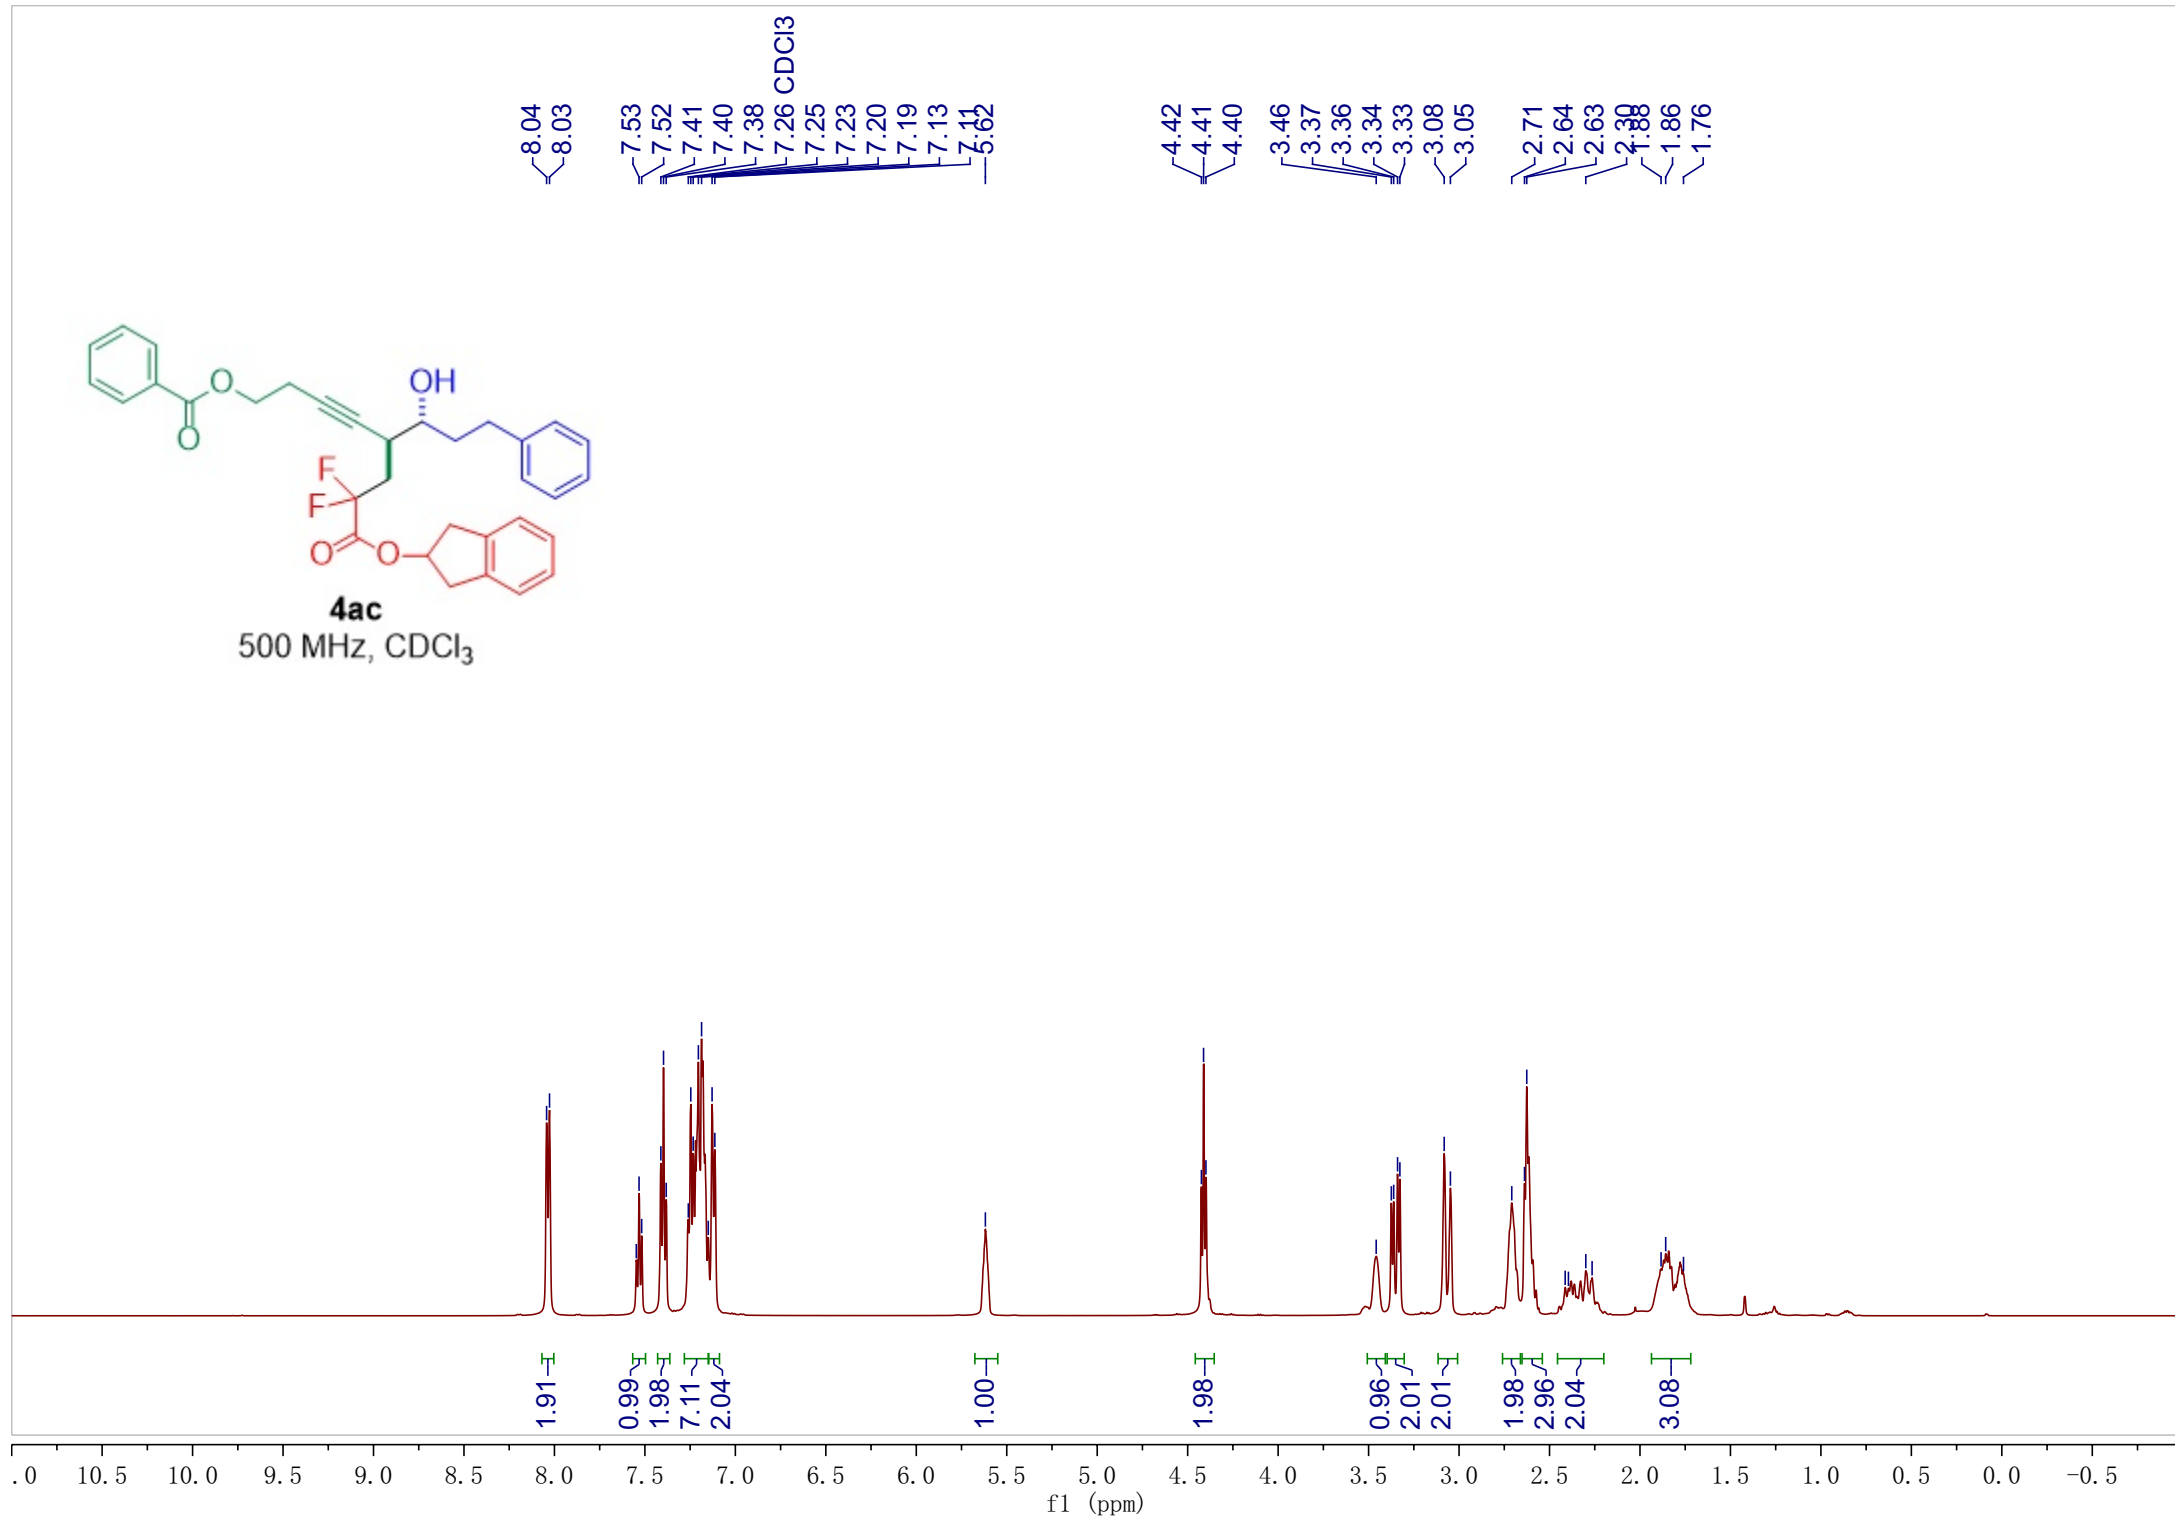

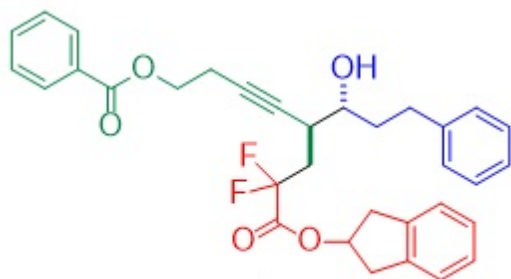

**4ac**

126 MHz, CDCl<sub>3</sub>

166.47  
164.02  
163.76  
163.50

141.41  
139.53  
133.13  
129.74  
129.60  
128.38  
128.33  
126.98  
125.87  
124.59  
117.38  
115.38  
115.32  
113.38

80.89  
78.84  
78.00  
77.26  
77.00 CDCl<sub>3</sub>  
76.75  
72.31  
—62.69

39.25  
39.21  
37.06  
37.01  
36.88  
36.70  
32.49  
31.92  
—19.59

A (t)  
163.76  
H

B (dd)  
115.36  
H

C (t)  
36.88  
H

D (m)  
32.49  
H

210 200 190 180 170 160 150 140 130 120 110 100 90 80 70 60 50 40 30 20 10 0 -10  
f1 (ppm)

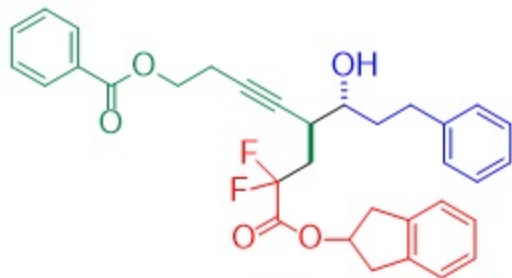

**4ac**  
471 MHz, CDCl<sub>3</sub>

102.79  
102.83  
102.85  
103.35  
103.38  
103.41  
105.14  
105.17  
105.21  
105.69  
105.73  
105.76

1.00  
0.94

20 10 0 -10 -20 -30 -40 -50 -60 -70 -80 -90 -100 -110 -120 -130 -140 -150 -160 -170 -180 -190 -200 -210 -220  
f1 (ppm)

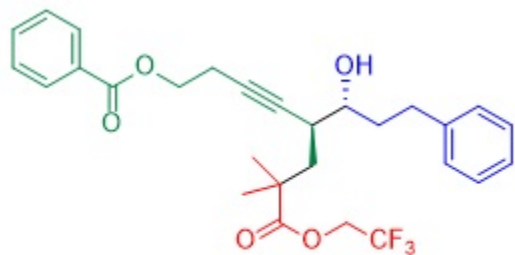

**4ad**  
500 MHz, CDCl<sub>3</sub>

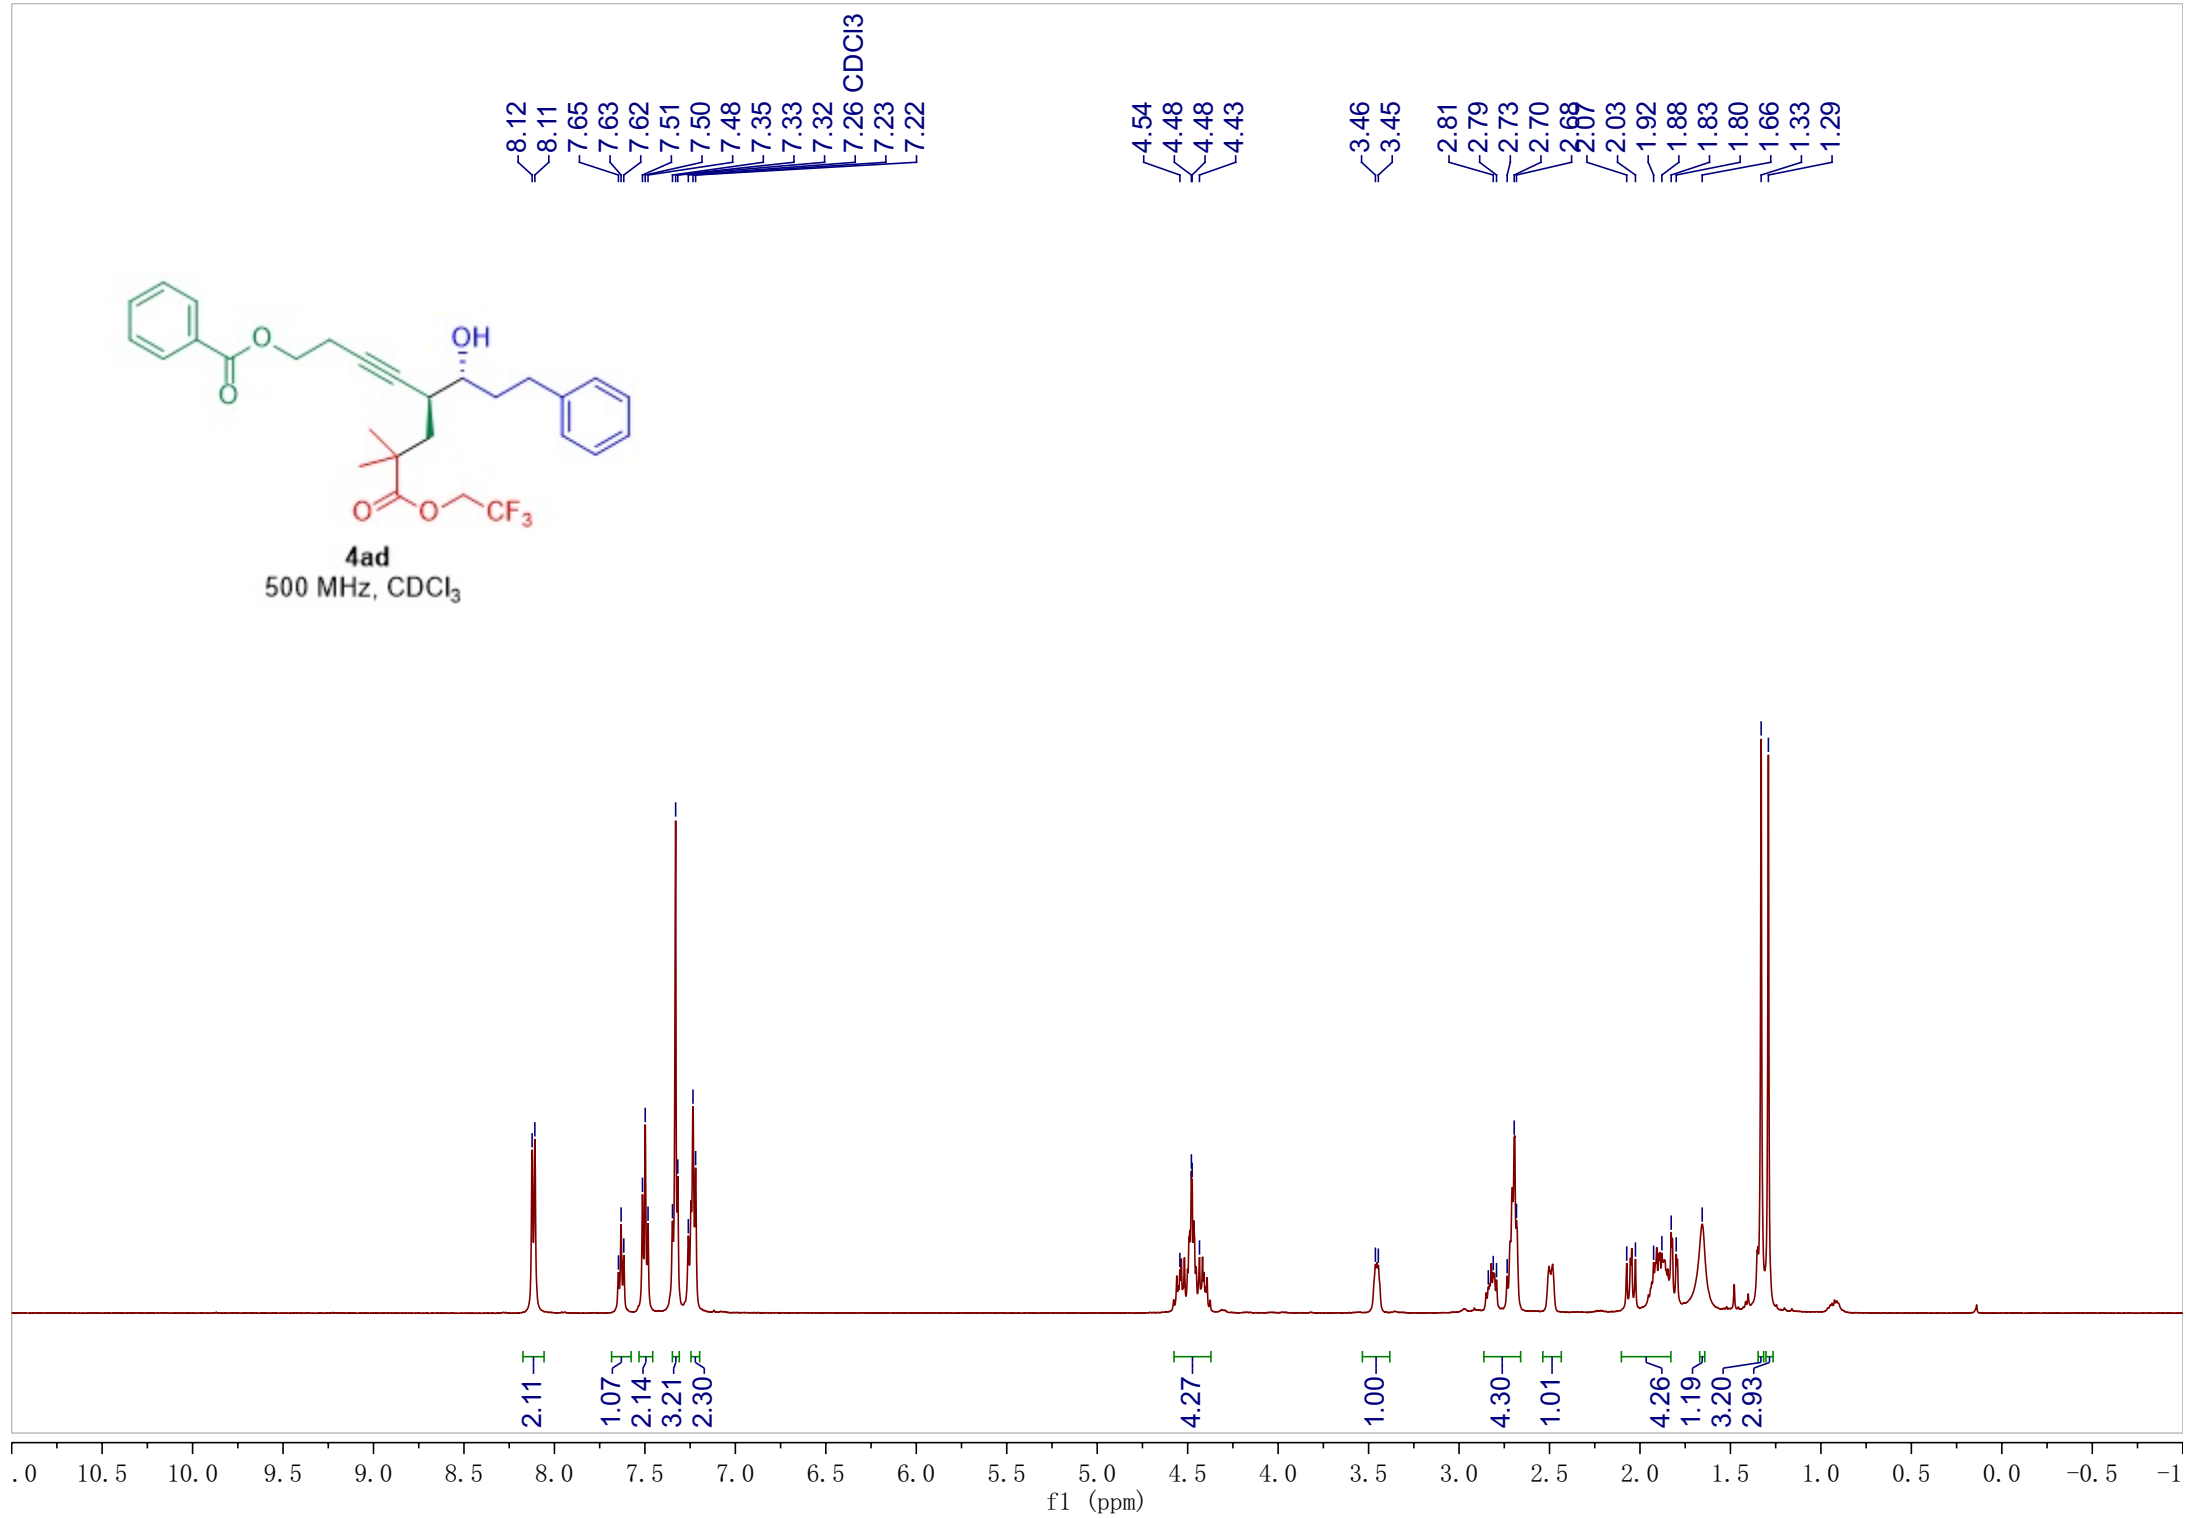

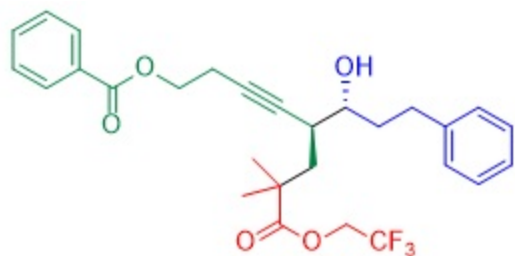

**4ad**  
126 MHz, CDCl<sub>3</sub>

—176.01

—166.44

—141.75

133.15

129.81

129.63

128.42

128.40

128.37

125.83

124.11

121.91

80.66

77.25

77.00 CDCl<sub>3</sub>

76.75

73.39

62.80

60.72

60.43

60.14

59.85

42.04

41.94

37.01

35.58

32.03

25.80

25.08

~19.56

B (d)  
123.01

A (q)  
60.29

210 200 190 180 170 160 150 140 130 120 110 100 90 80 70 60 50 40 30 20 10 0 -10

f1 (ppm)



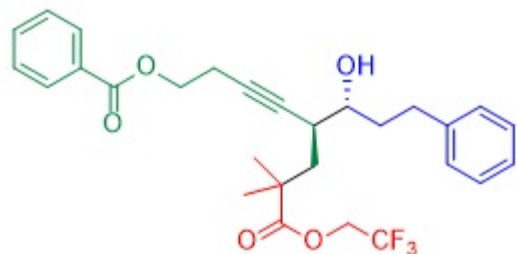

**4ad**  
471 MHz, CDCl<sub>3</sub>

73.69  
73.71  
73.73

1.00

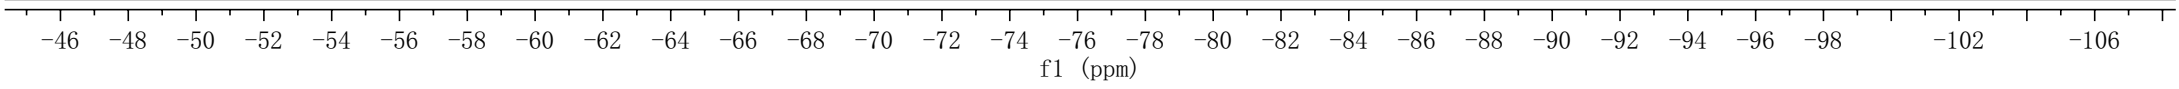

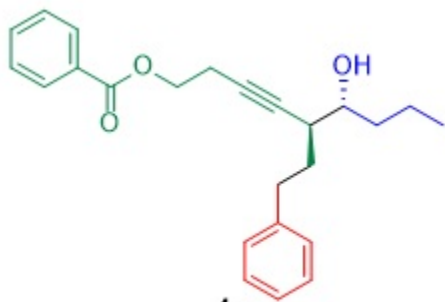

4ae  
500 MHz, CDCl<sub>3</sub>

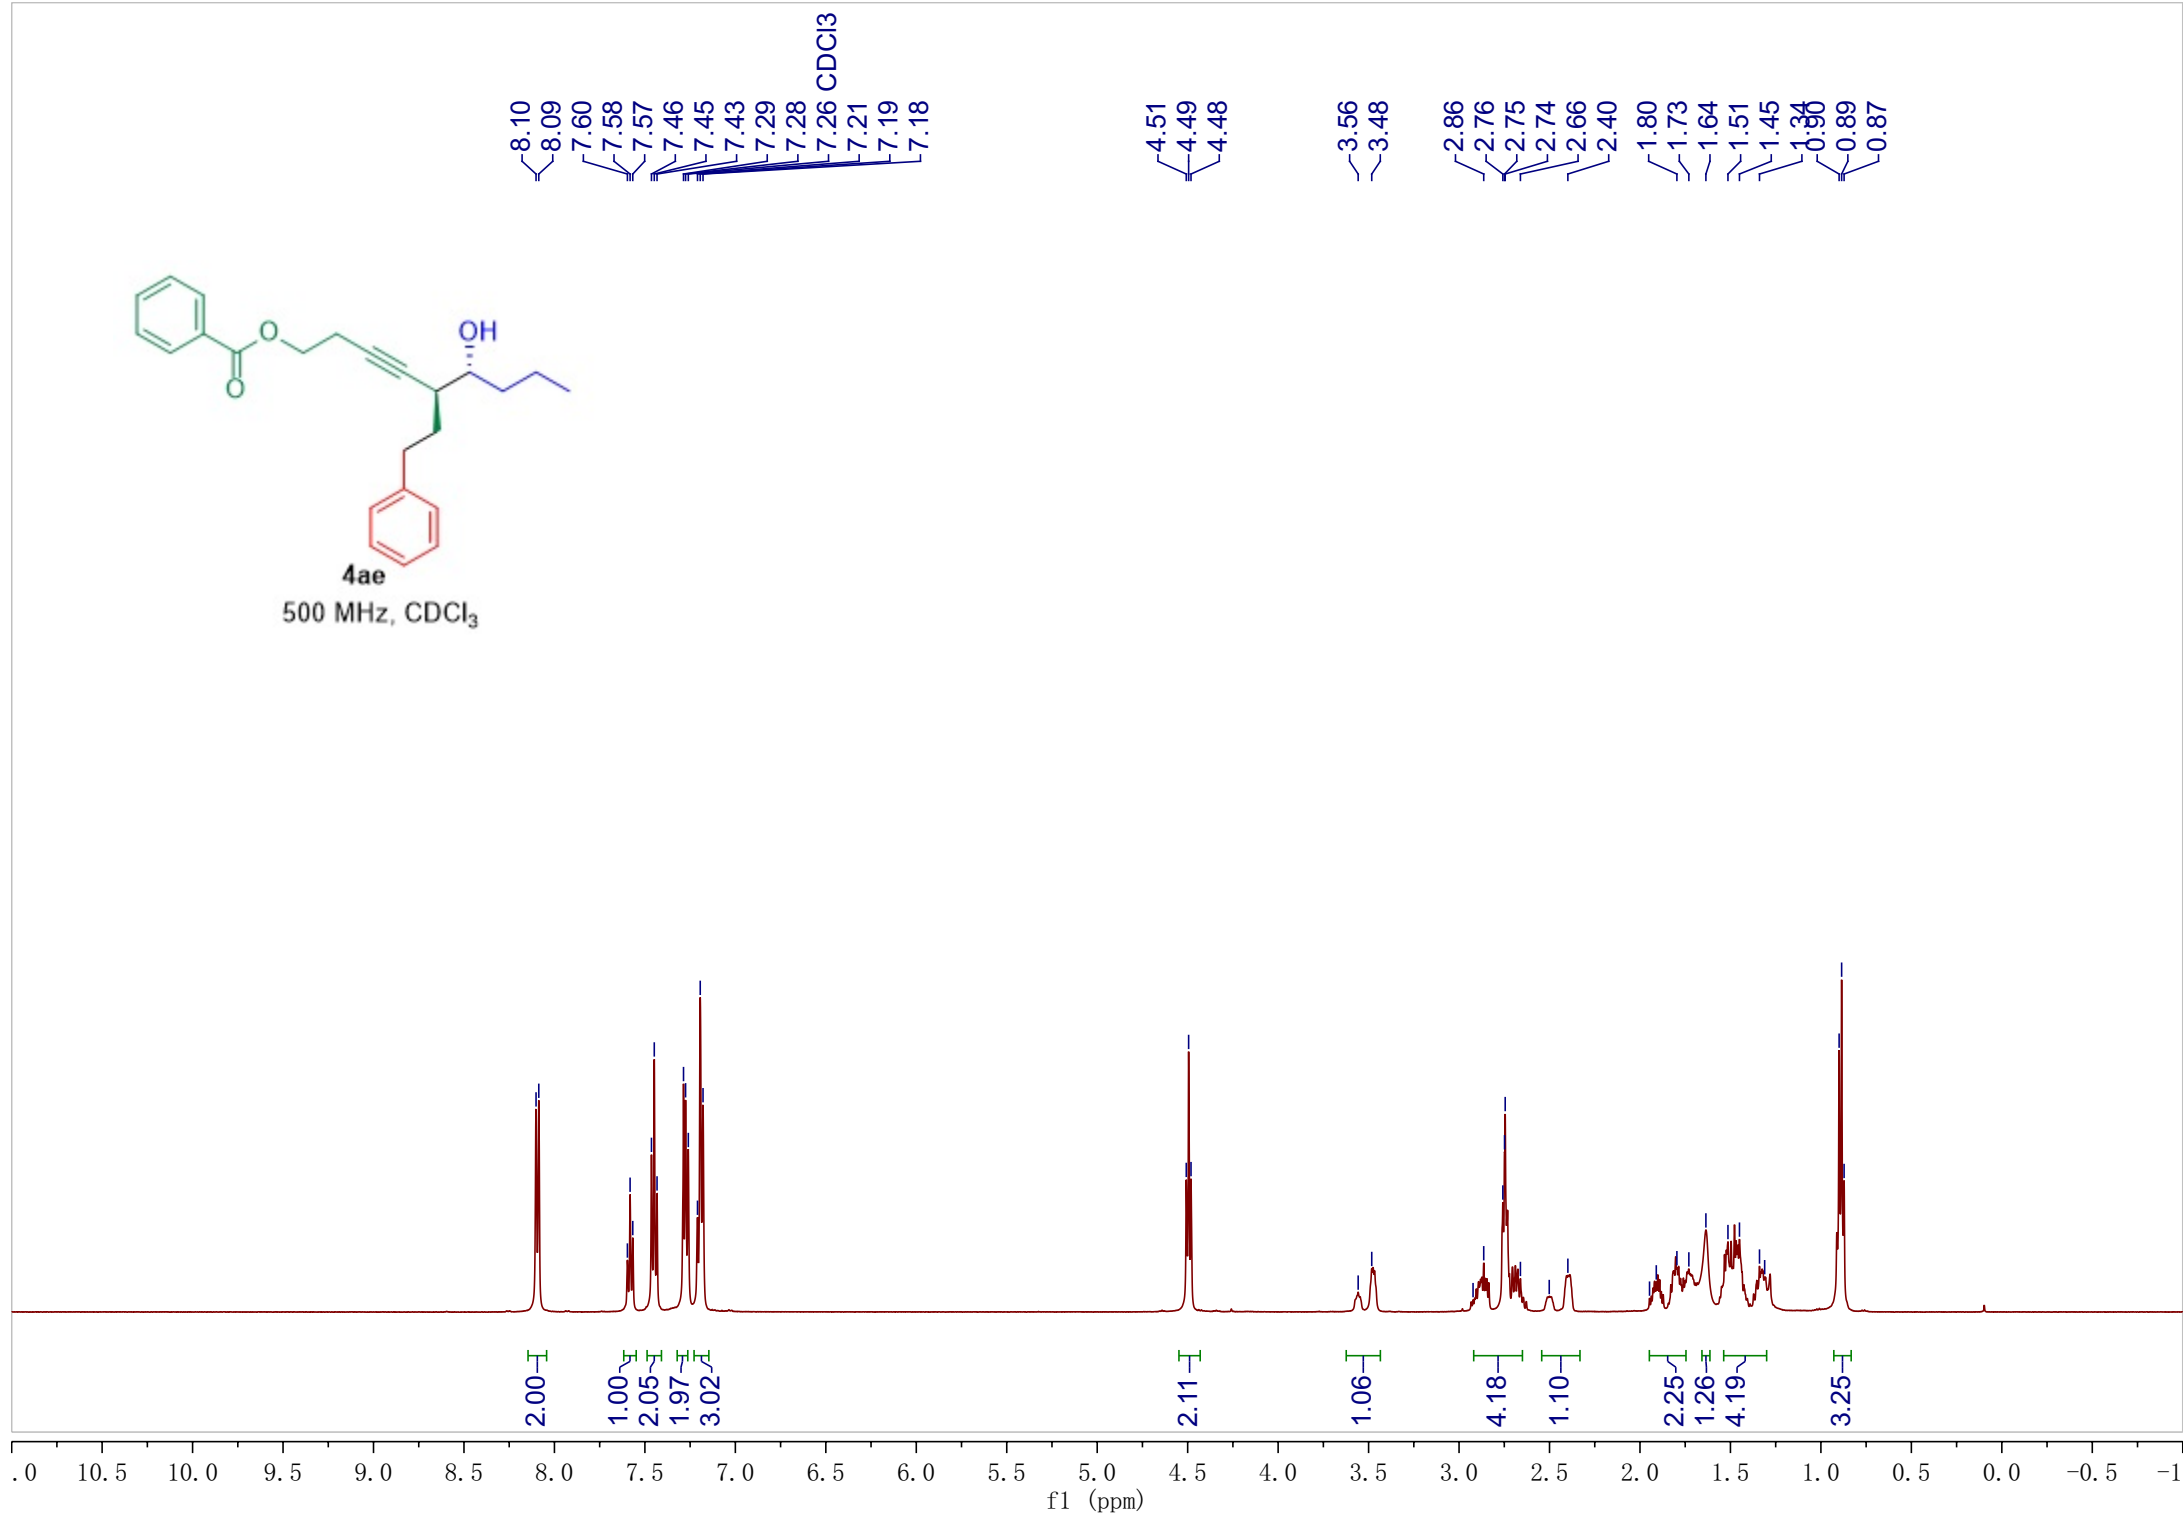

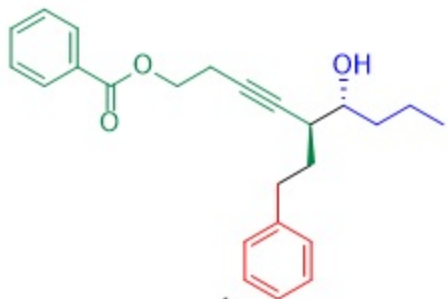

**4ae**  
126 MHz, CDCl<sub>3</sub>

166.46

141.80  
133.09  
129.92  
129.63  
128.45  
128.38  
128.30  
125.80

81.00  
80.41  
77.25  
77.00 CDCl<sub>3</sub>  
76.75  
73.01  
63.10

38.64  
37.88  
33.72  
33.70

19.64  
18.98  
13.96

210 200 190 180 170 160 150 140 130 120 110 100 90 80 70 60 50 40 30 20 10 0 -10

f1 (ppm)

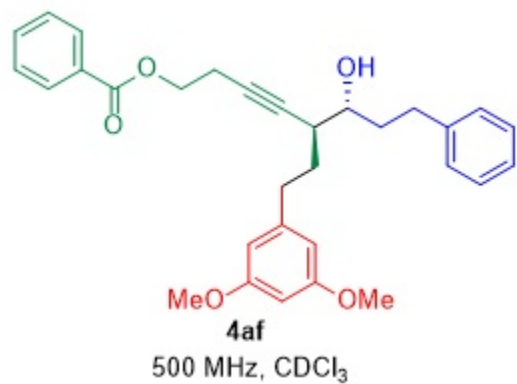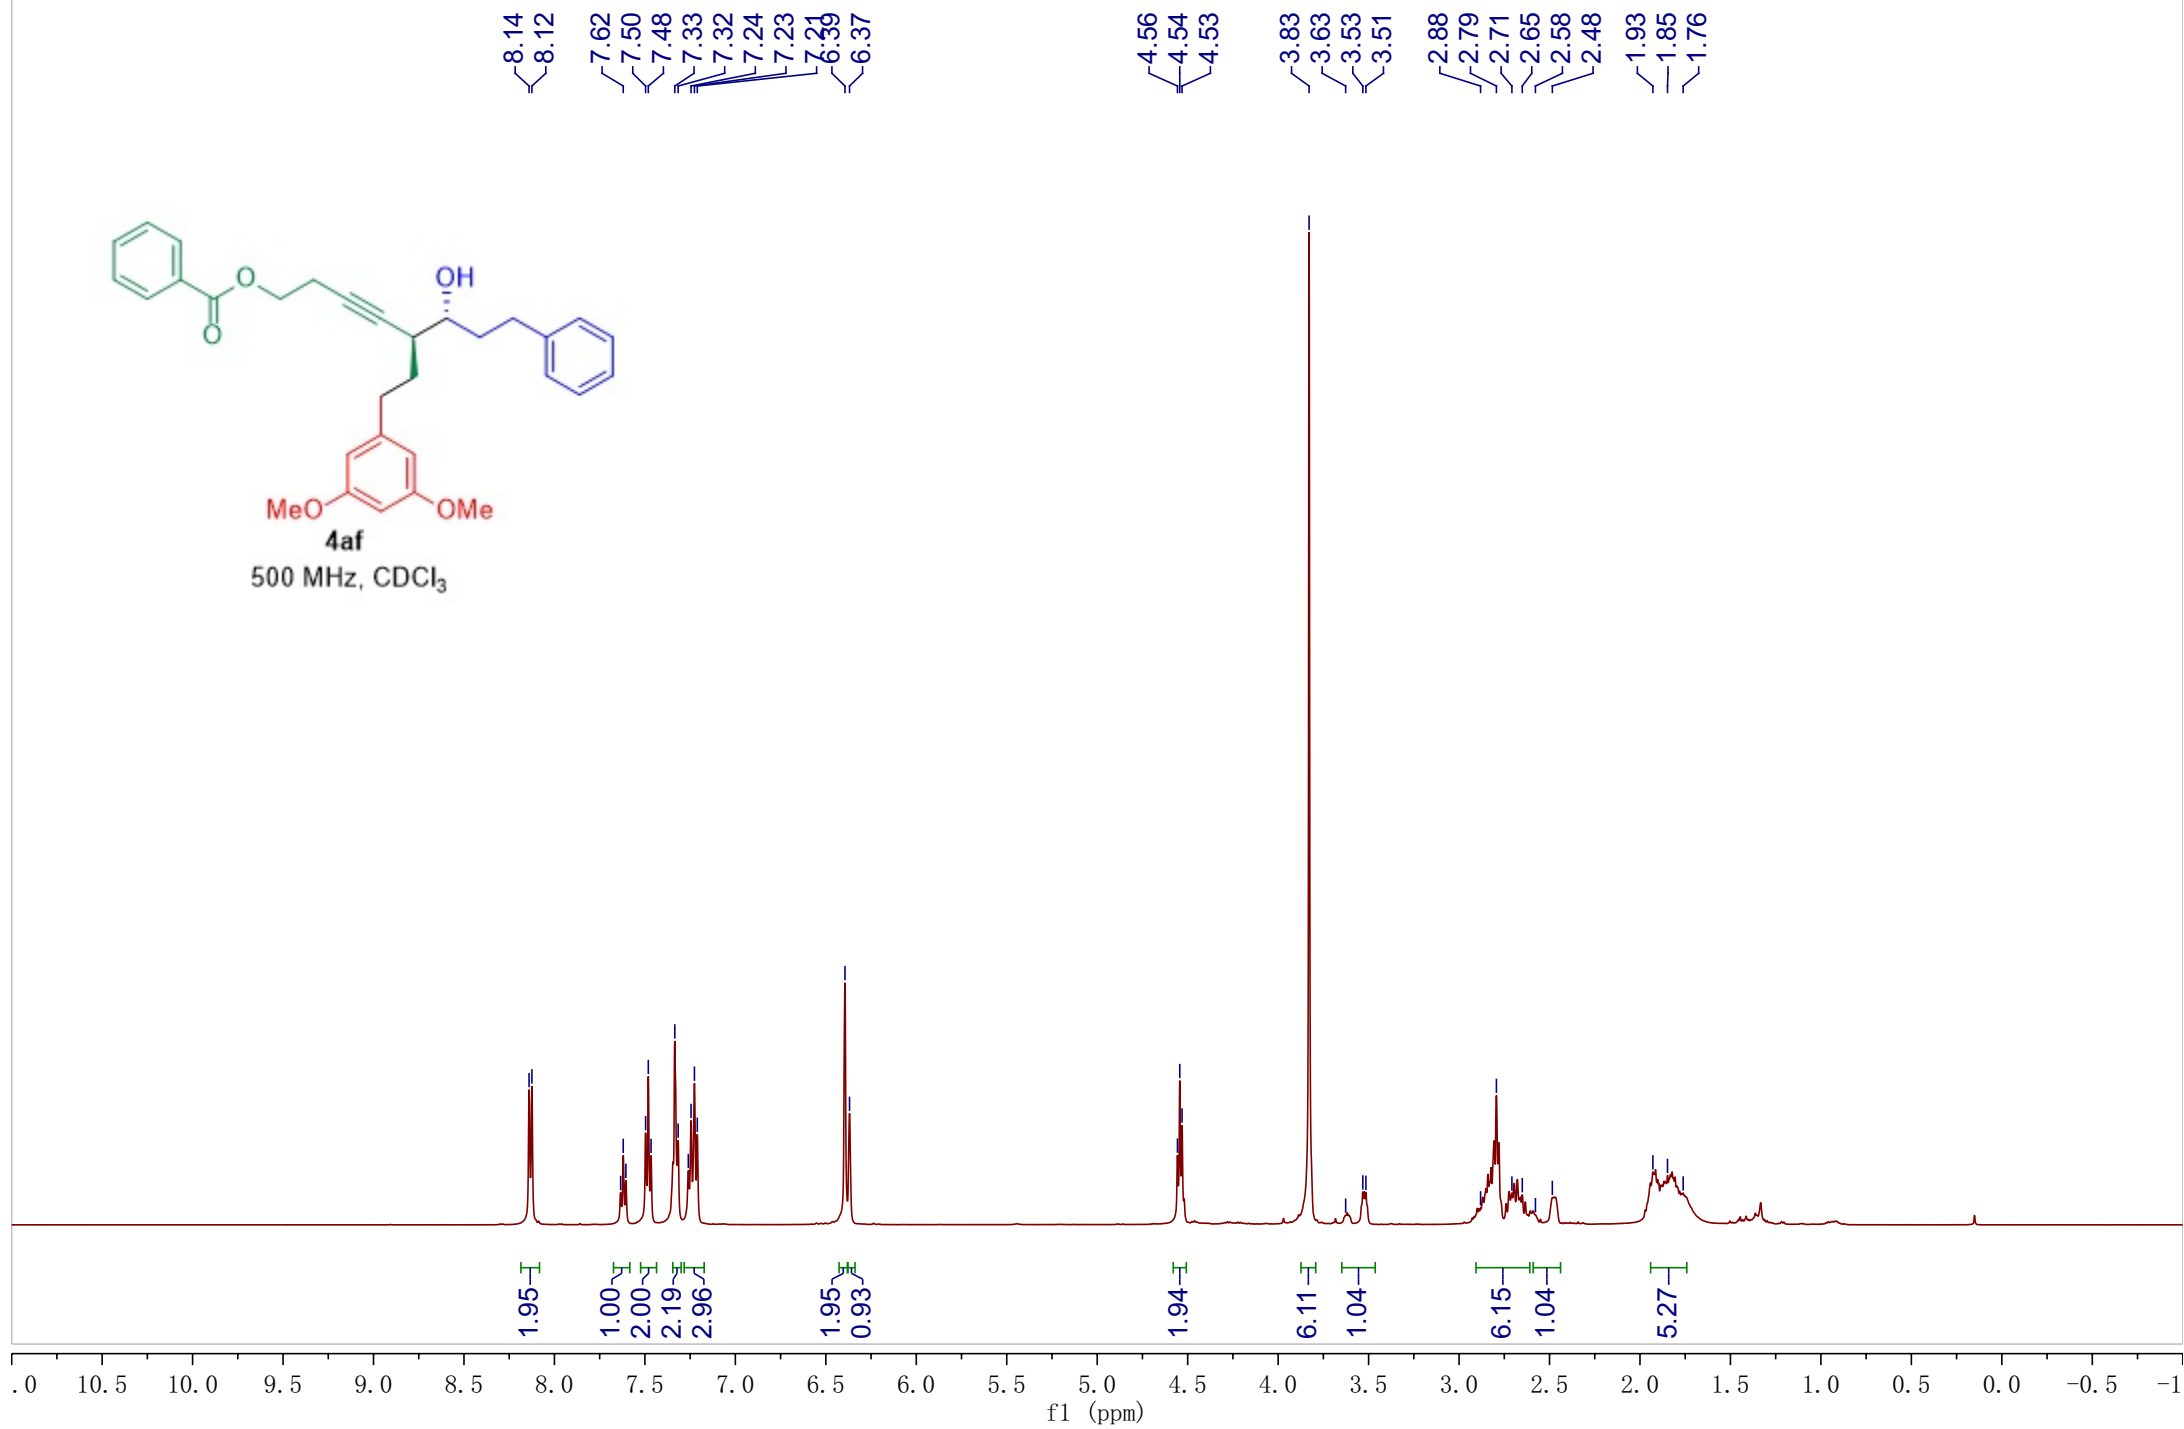

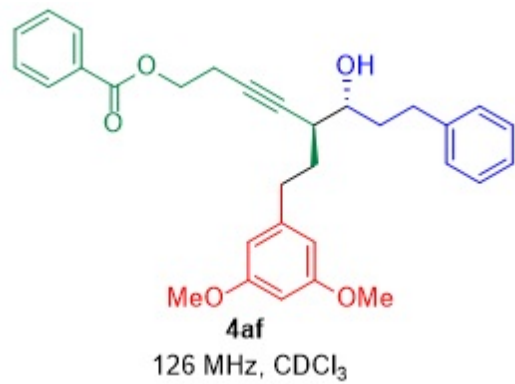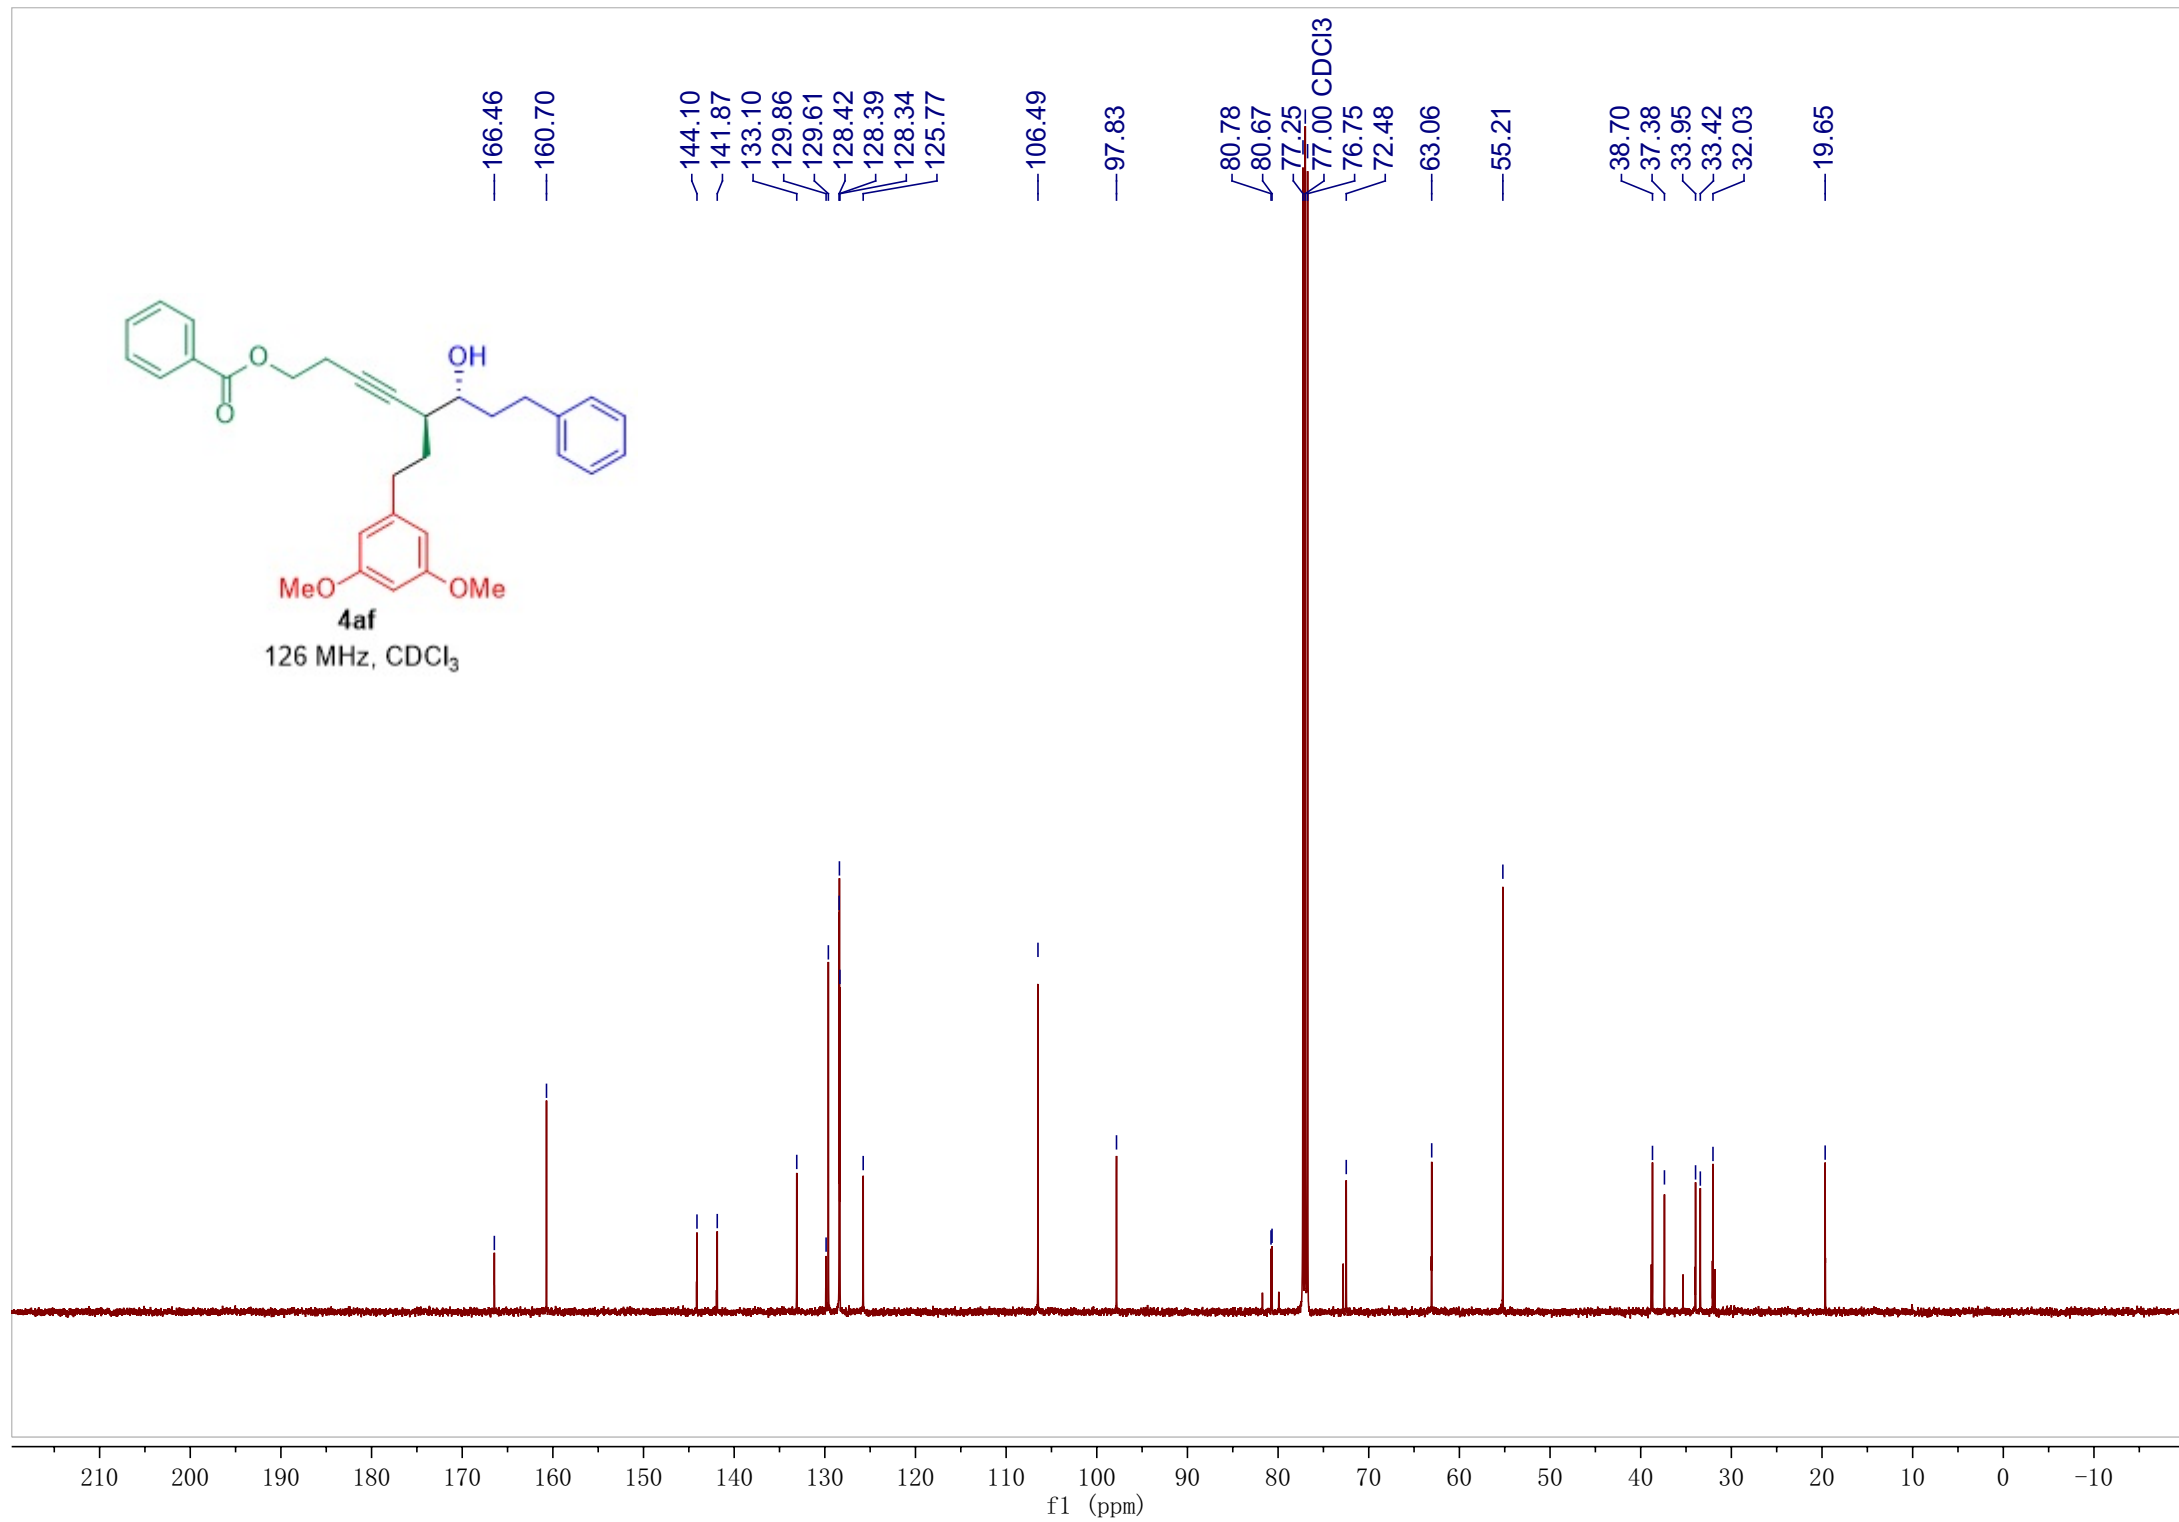

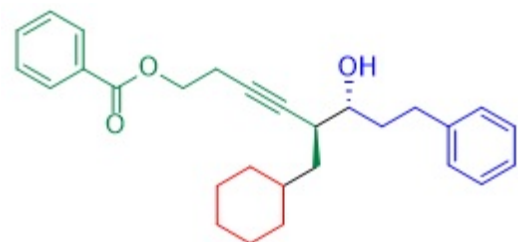

**4ag**

500 MHz, CDCl<sub>3</sub>

8.05  
8.03  
7.55  
7.53  
7.52  
7.42  
7.40  
7.39  
7.26 CDCl<sub>3</sub>  
7.24  
7.23  
7.16  
7.15

4.42  
4.41  
4.40

3.50  
3.40  
3.38  
3.36  
2.78  
2.75  
2.67  
2.65  
2.64  
2.48  
2.47

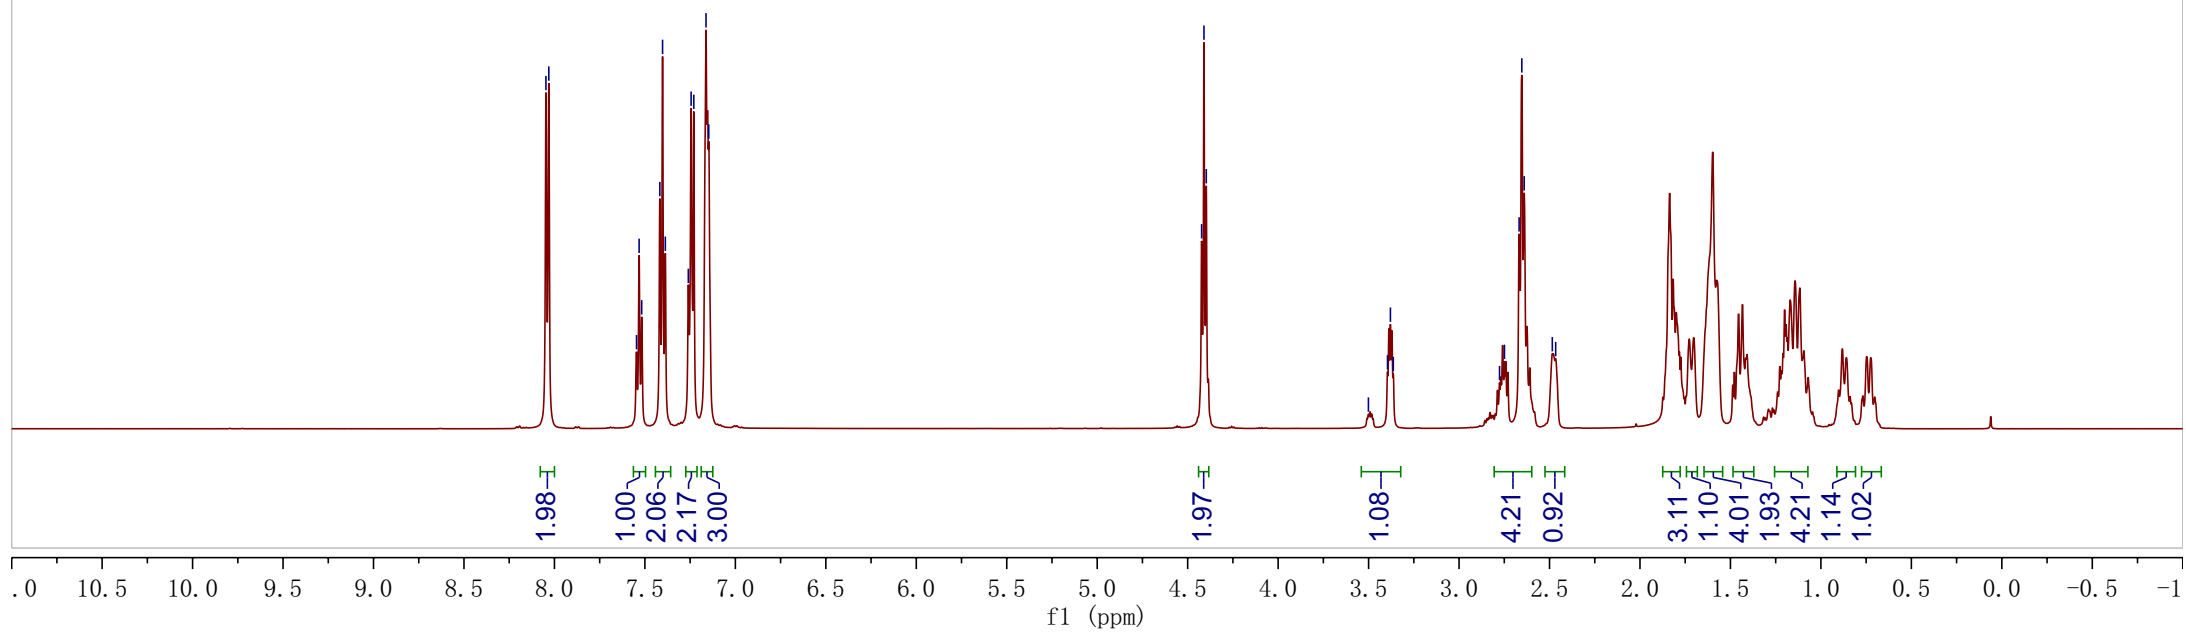

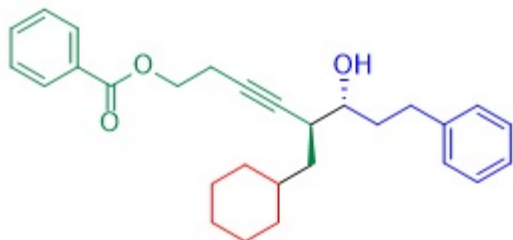

**4ag**  
126 MHz, CDCl<sub>3</sub>

—166.41

—141.97  
133.03  
129.89  
129.59  
128.39  
128.33  
128.30  
125.71

81.21  
79.80  
77.25  
77.00 CDCl<sub>3</sub>  
76.75  
72.75  
—63.08

39.42  
37.37  
36.42  
35.24  
33.95  
32.25  
32.06  
26.51  
26.16  
26.05  
19.57

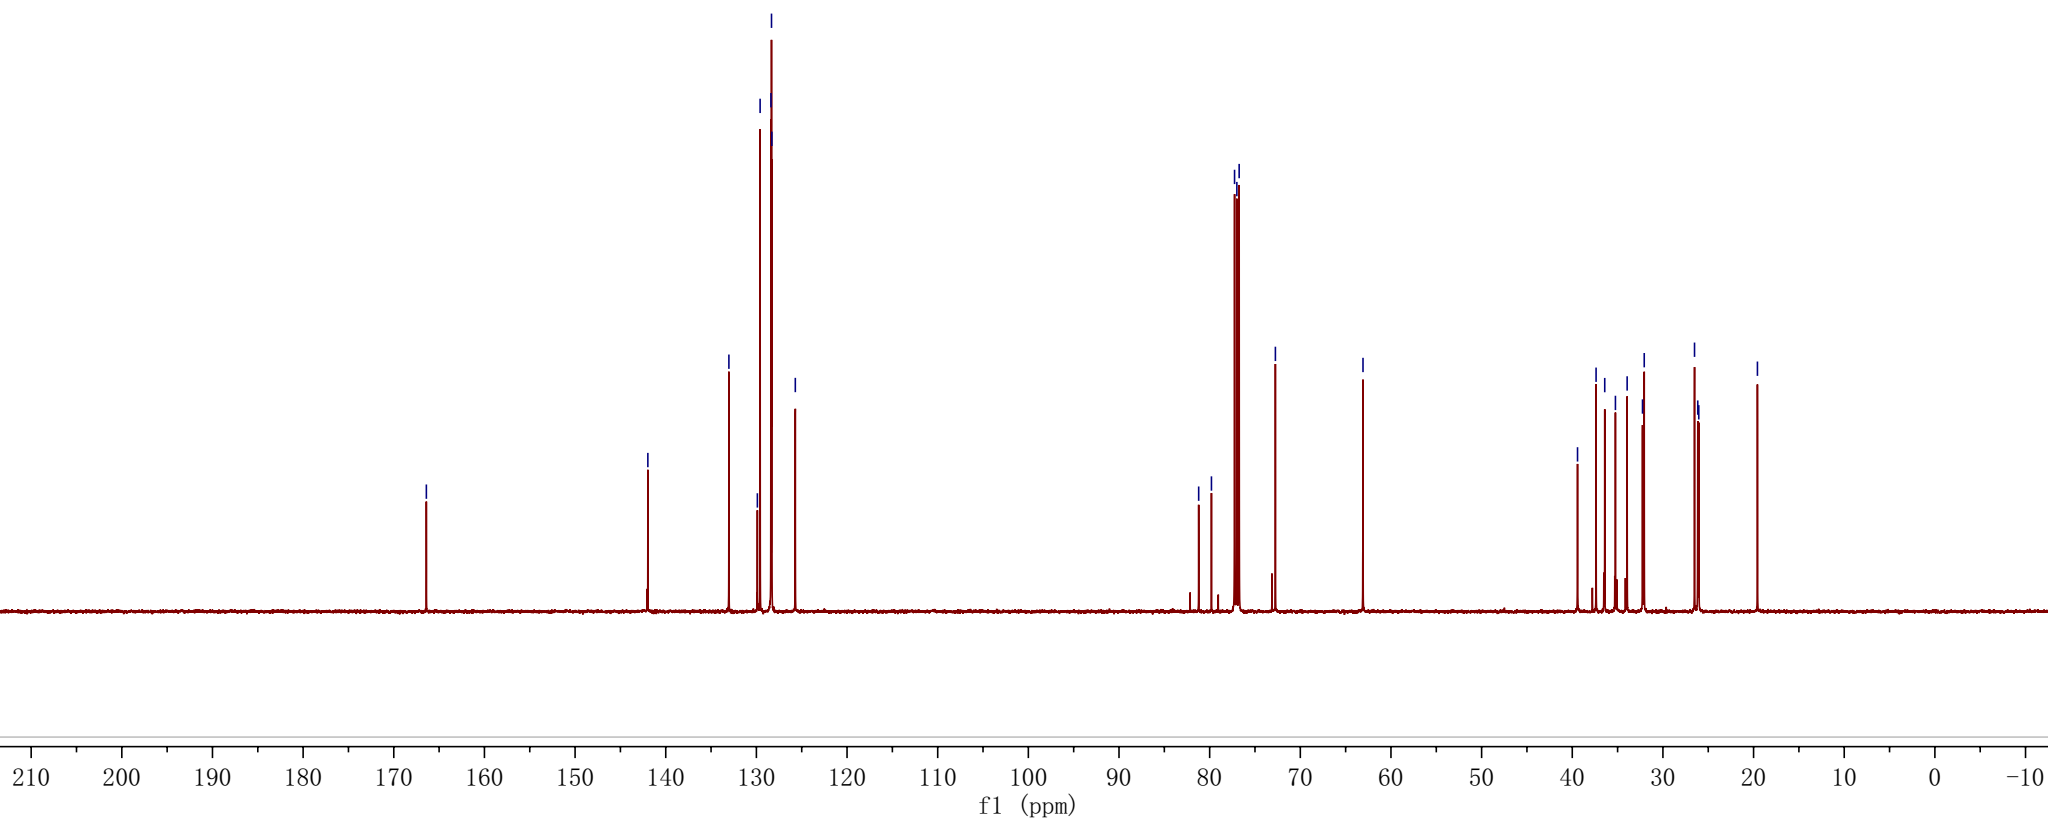

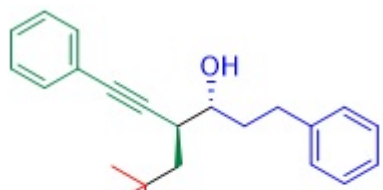

4ah

500 MHz, CDCl<sub>3</sub>

7.35  
7.34  
7.33  
7.26 CDCl<sub>3</sub>  
7.24  
7.24  
7.23  
7.20  
7.18  
7.16  
7.14  
7.13

3.55  
3.49  
2.84  
2.81  
2.79  
2.72  
2.66  
2.62  
1.92  
1.83  
1.81  
1.67  
1.64  
1.44  
1.41

2.05  
4.96  
2.17  
1.11

1.00

3.01

1.95  
0.98  
0.87  
1.14

9.17

10.5 10.0 9.5 9.0 8.5 8.0 7.5 7.0 6.5 6.0 5.5 5.0 4.5 4.0 3.5 3.0 2.5 2.0 1.5 1.0 0.5 0.0 -0.5 -1

f1 (ppm)



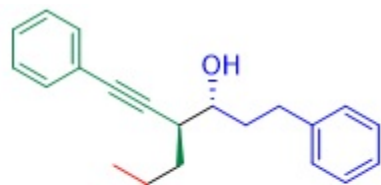

4ah

126 MHz, CDCl<sub>3</sub>

141.95  
131.46  
128.48  
128.39  
128.24  
127.85  
125.83  
123.48

90.57  
84.43  
77.25  
77.00 CDCl<sub>3</sub>  
76.75  
74.26

45.97  
37.08  
35.79  
32.25  
30.80  
29.83

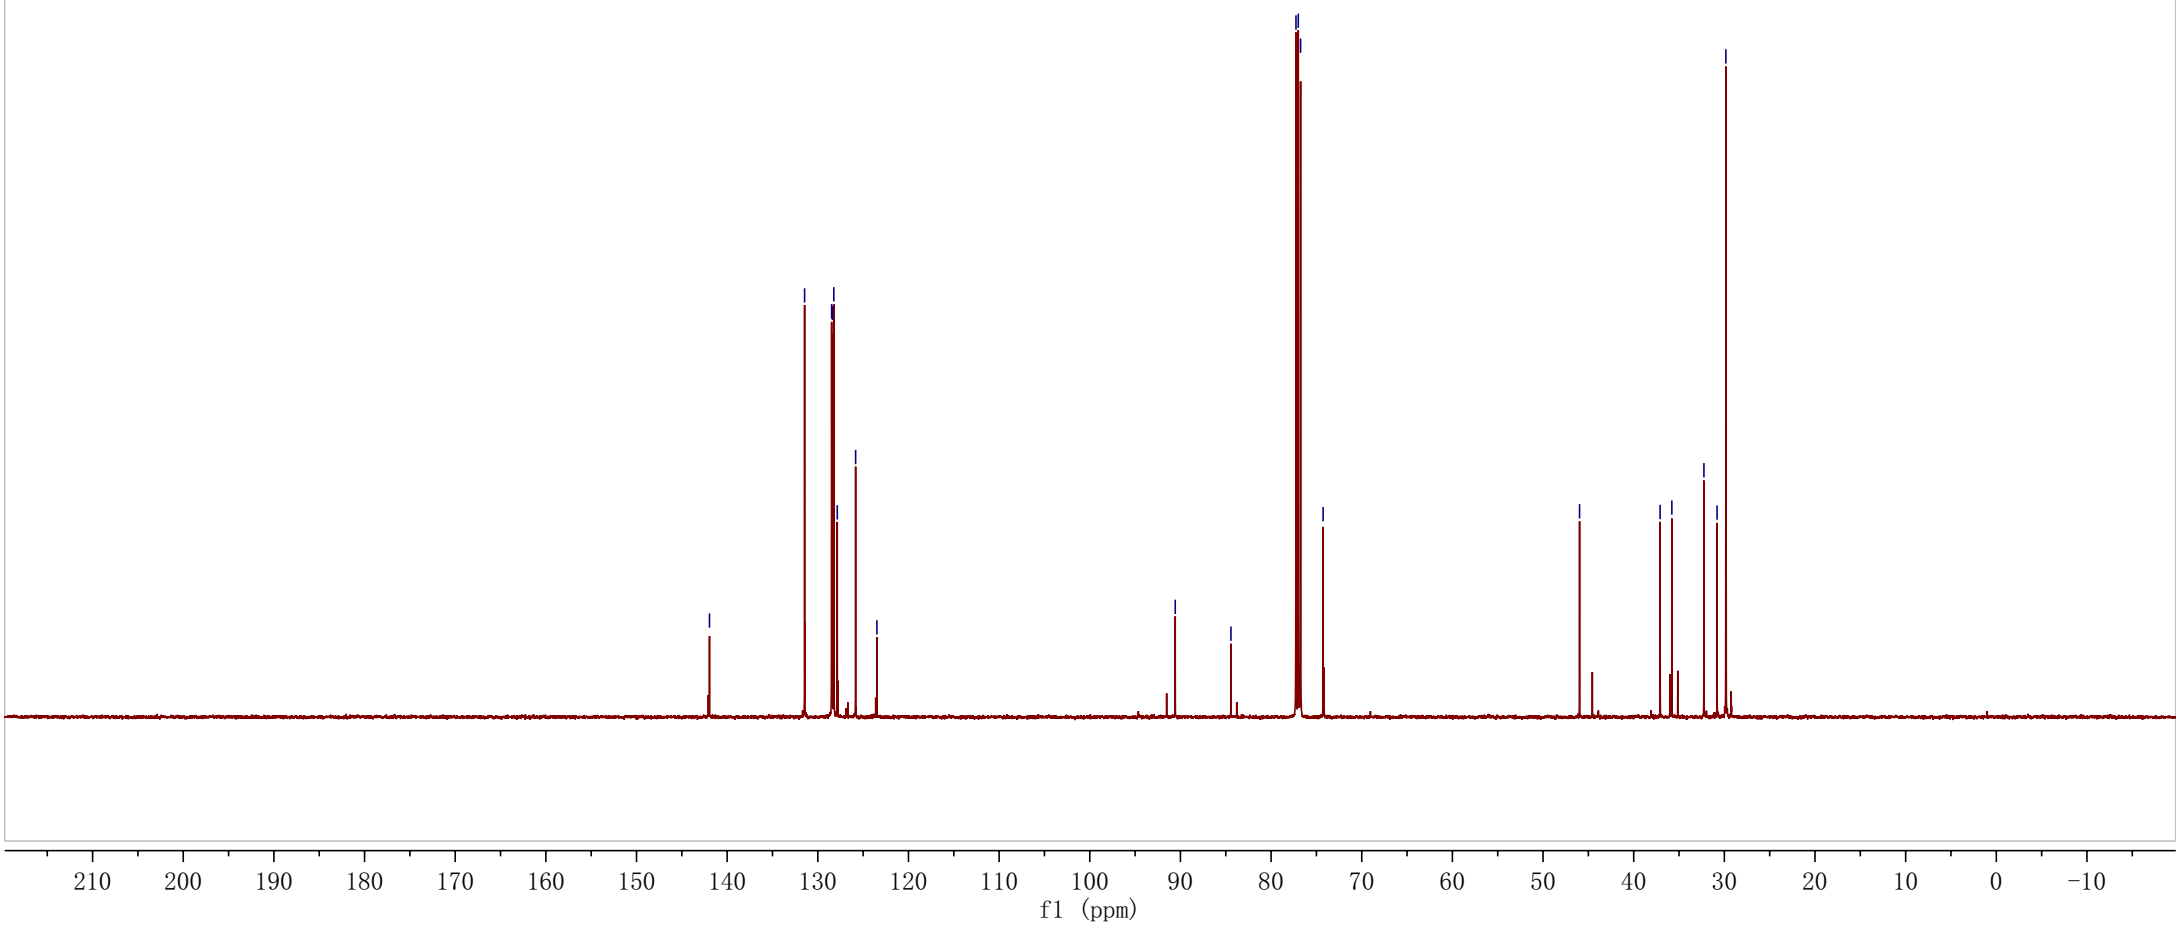

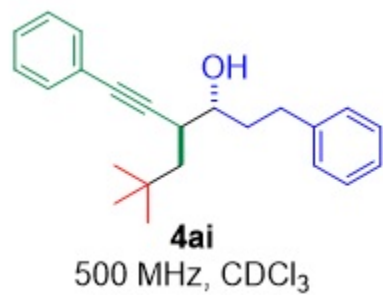

7.35  
7.34  
7.33  
7.26 CDCl<sub>3</sub>  
7.24  
7.24  
7.23  
7.20  
7.18  
7.16  
7.14  
7.13

3.55  
3.49  
2.84  
2.81  
2.79  
2.72  
2.66  
2.62  
1.92  
1.83  
1.81  
1.67  
1.64  
1.44  
1.41

2.05  
4.96  
2.17  
1.11

1.00

3.01

1.95  
0.98  
0.87  
1.14

9.17

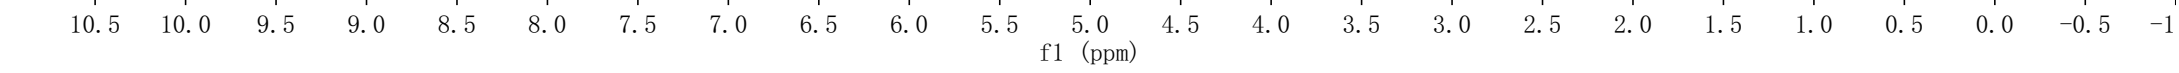

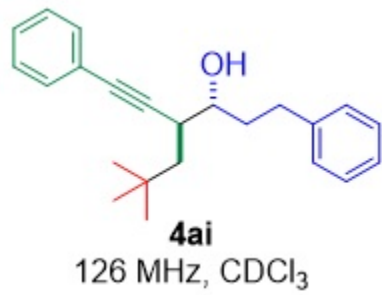

141.95  
131.46  
128.48  
128.39  
128.24  
127.85  
125.83  
123.48

90.57  
84.43  
77.25  
77.00 CDCl<sub>3</sub>  
76.75  
74.26

45.97  
37.08  
35.79  
32.25  
30.80  
29.83

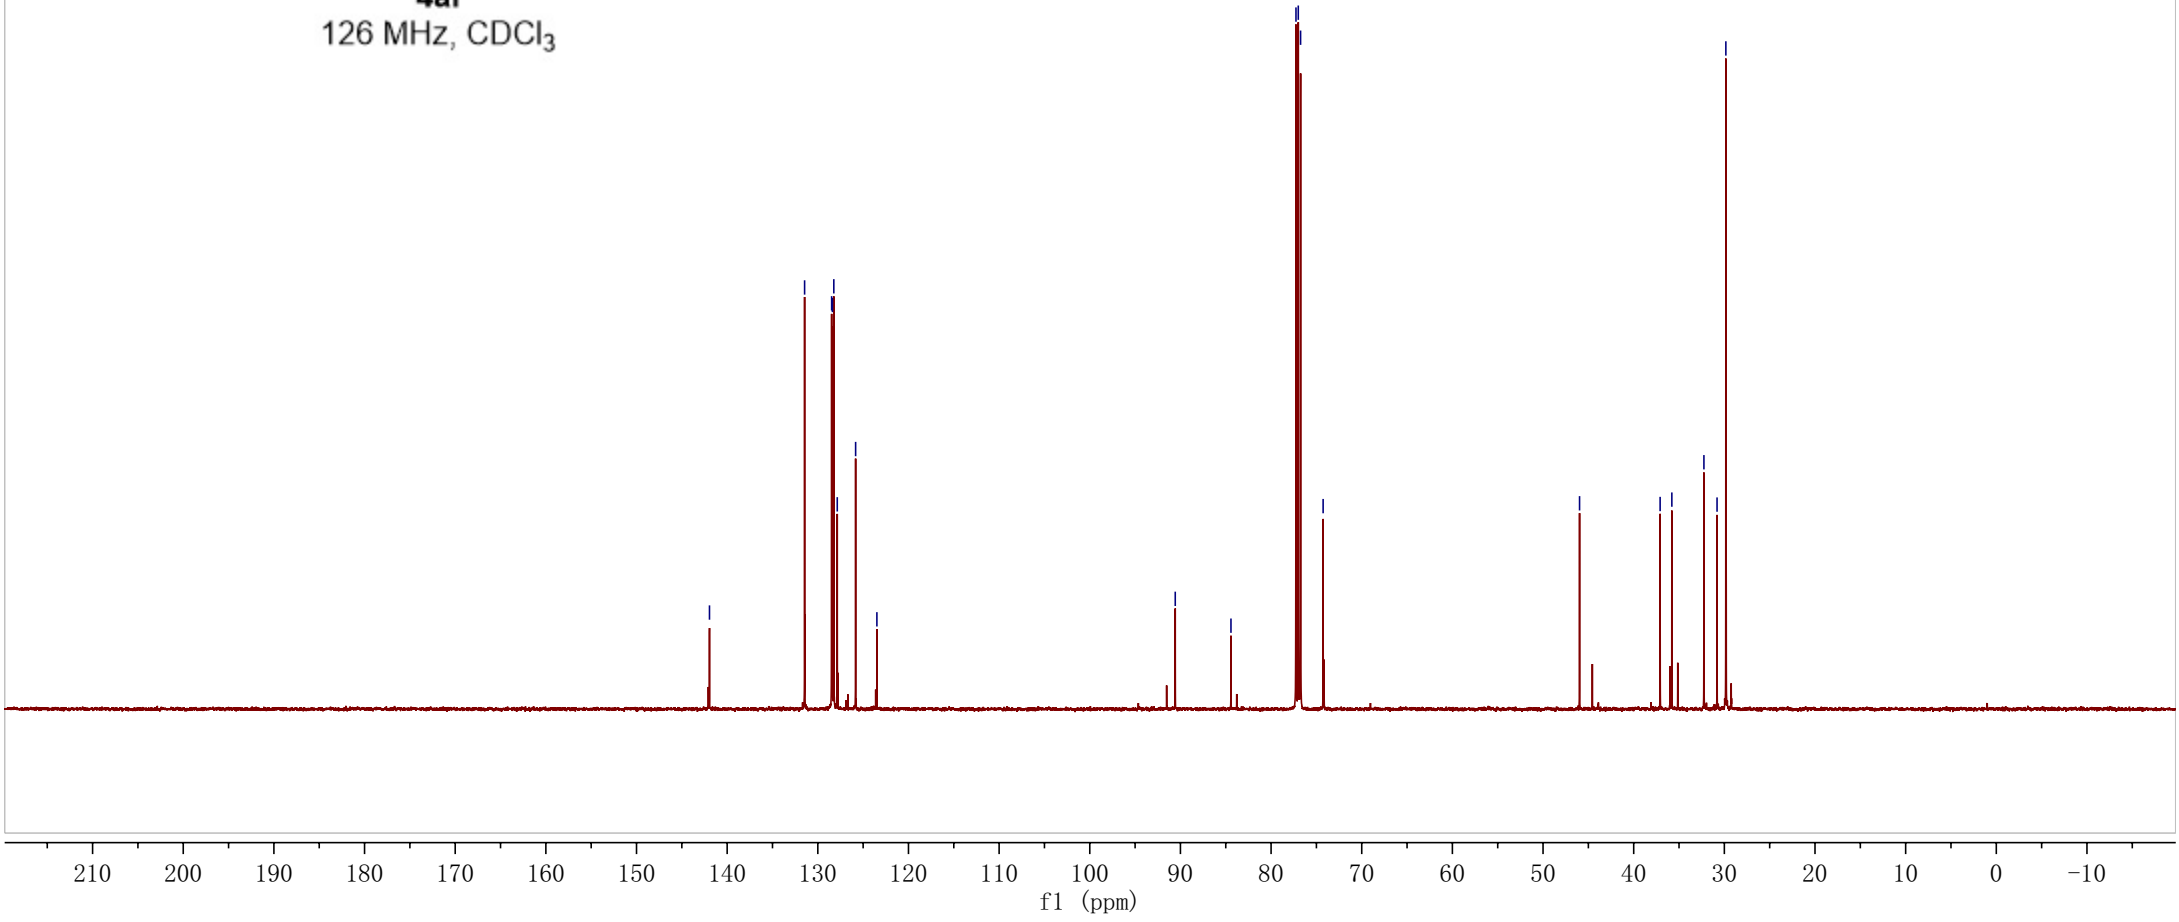

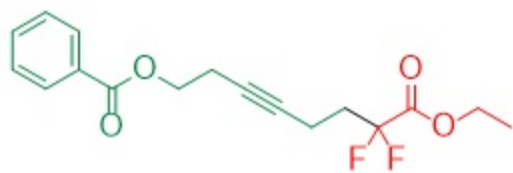

**5**  
500 MHz, CDCl<sub>3</sub>

8.06  
8.04  
7.58  
7.56  
7.54  
7.46  
7.44  
7.42  
7.26 CDCl<sub>3</sub>

4.39  
4.37  
4.35  
4.34  
4.33  
4.31  
4.29

2.63  
2.61  
2.59  
2.41  
2.39  
2.37  
2.34  
2.30  
2.28  
2.24  
2.23  
1.36  
1.35  
1.33

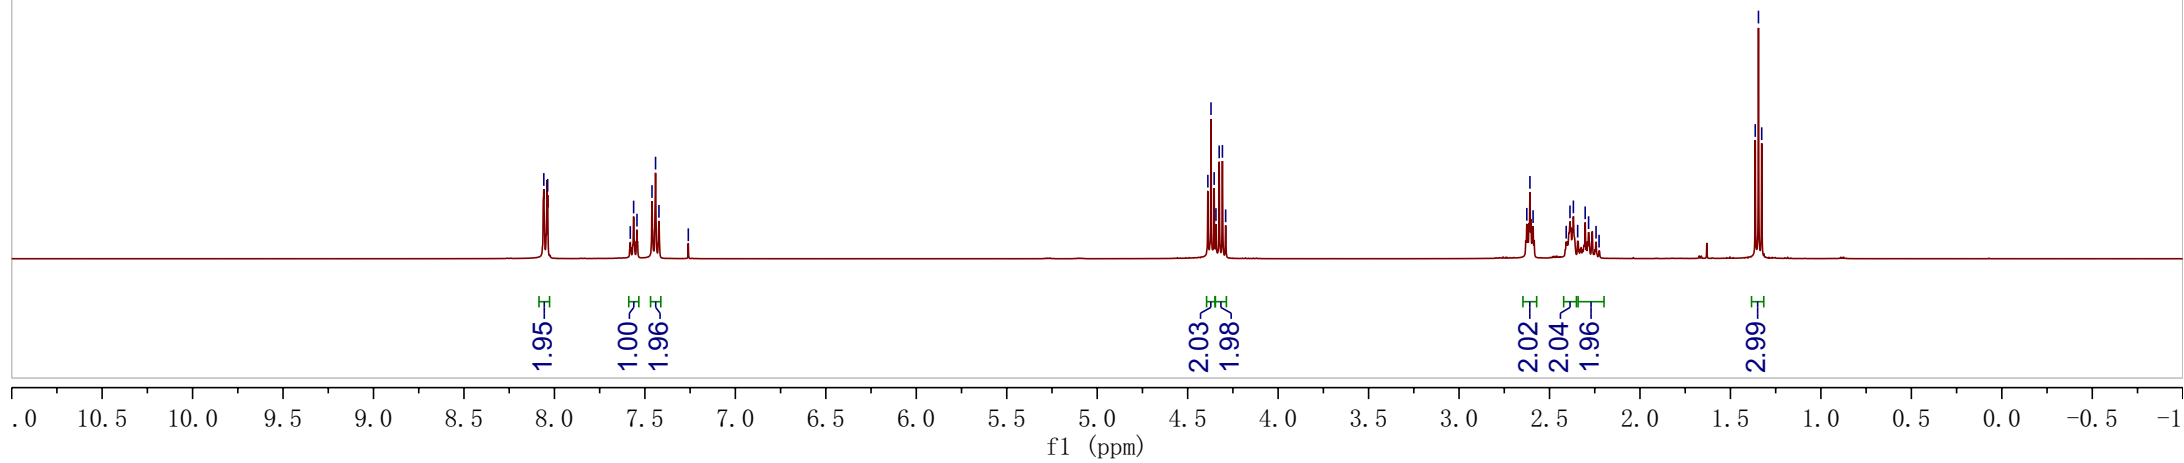

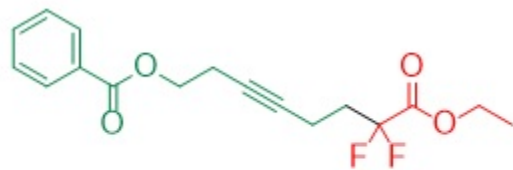

**5**  
126 MHz, CDCl<sub>3</sub>

166.29  
164.06  
163.73  
163.41

133.00  
130.01  
129.60  
128.34  
117.63  
115.18  
115.14  
112.64

78.97  
77.32  
77.00 CDCl<sub>3</sub>  
76.79  
76.68

62.93  
62.91

34.25  
34.02  
33.78

19.27  
13.89  
11.80  
11.74  
11.68

A (t)  
163.73  
H

B (dd)  
115.14  
H

C (t)  
34.02  
H

D (t)  
11.74  
H

210 200 190 180 170 160 150 140 130 120 110 100 90 80 70 60 50 40 30 20 10 0 -10  
f1 (ppm)

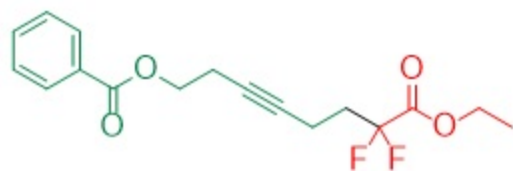

**5**

471 MHz, CDCl<sub>3</sub>

101.88  
102.44  
103.03  
105.63  
105.67  
105.74  
106.19  
106.23  
106.30

1.00  
0.94

-10 -20 -30 -40 -50 -60 -70 -80 -90 -100 -110 -120 -130 -140 -150 -160 -170 -180 -190 -200 -210 -2

f1 (ppm)

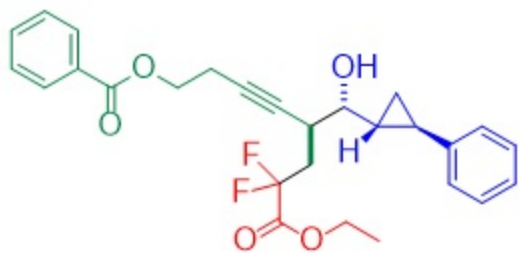

**7a (major)**  
500 MHz, CDCl<sub>3</sub>

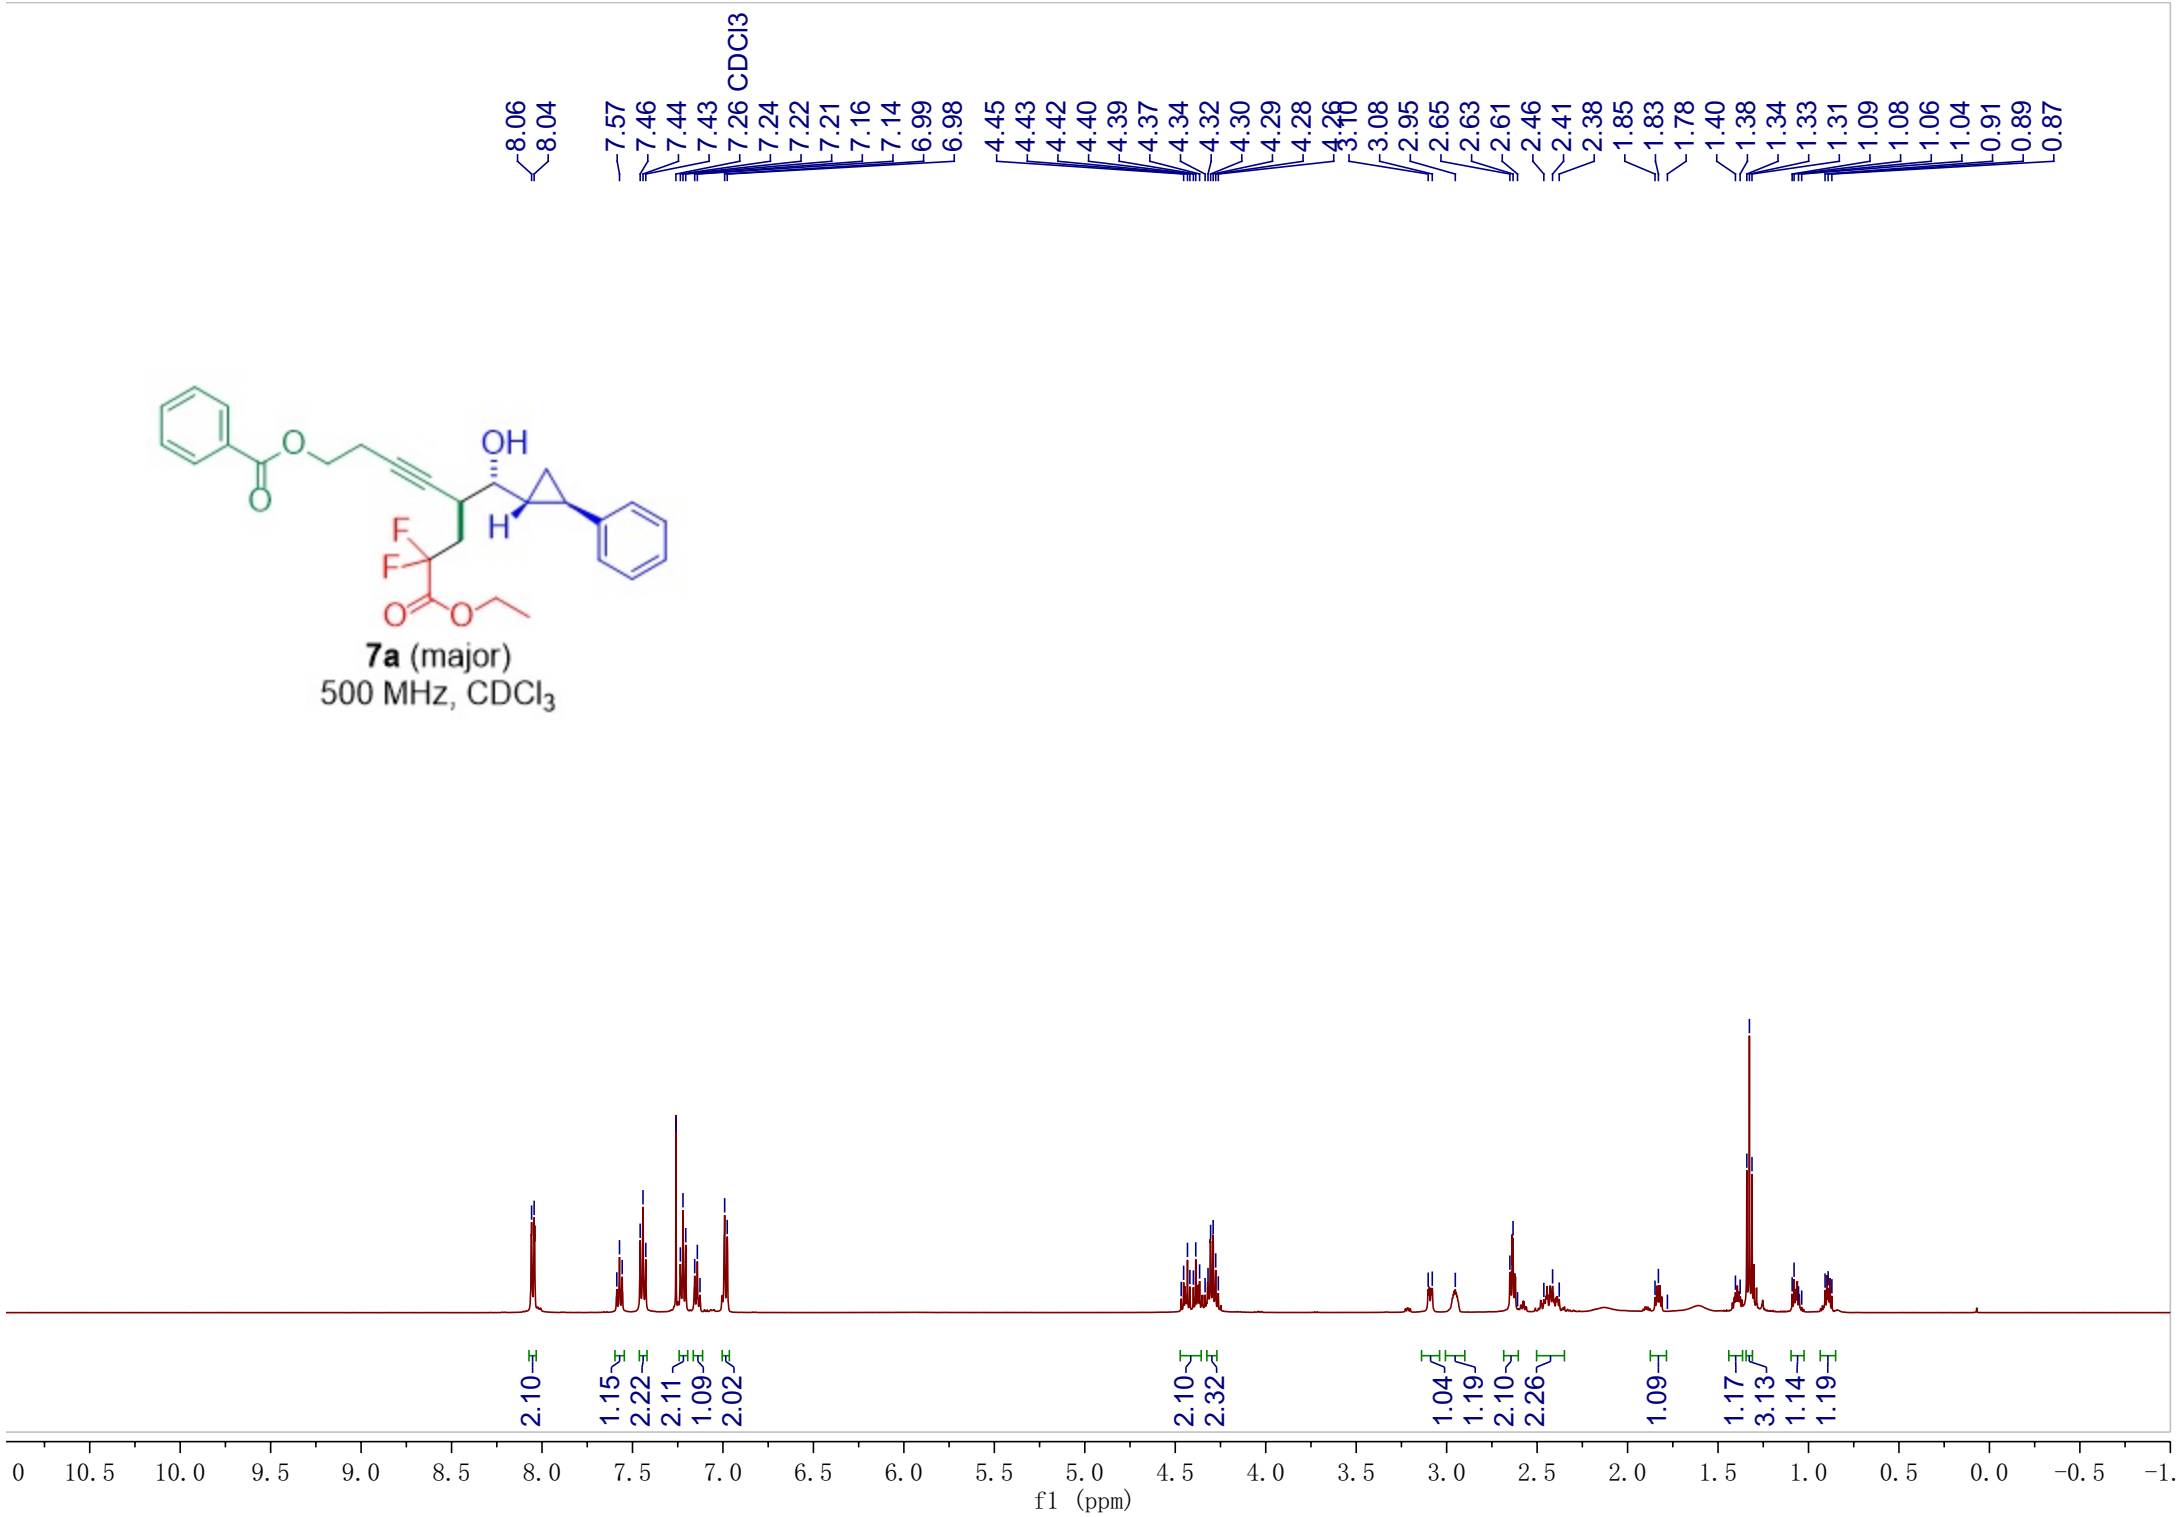

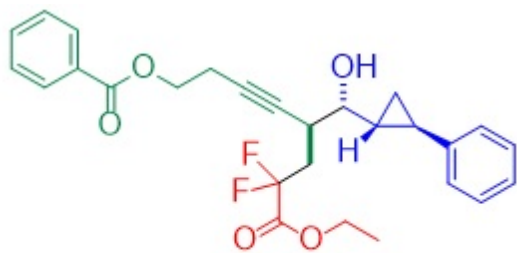

**7a** (major)  
126 MHz, CDCl<sub>3</sub>

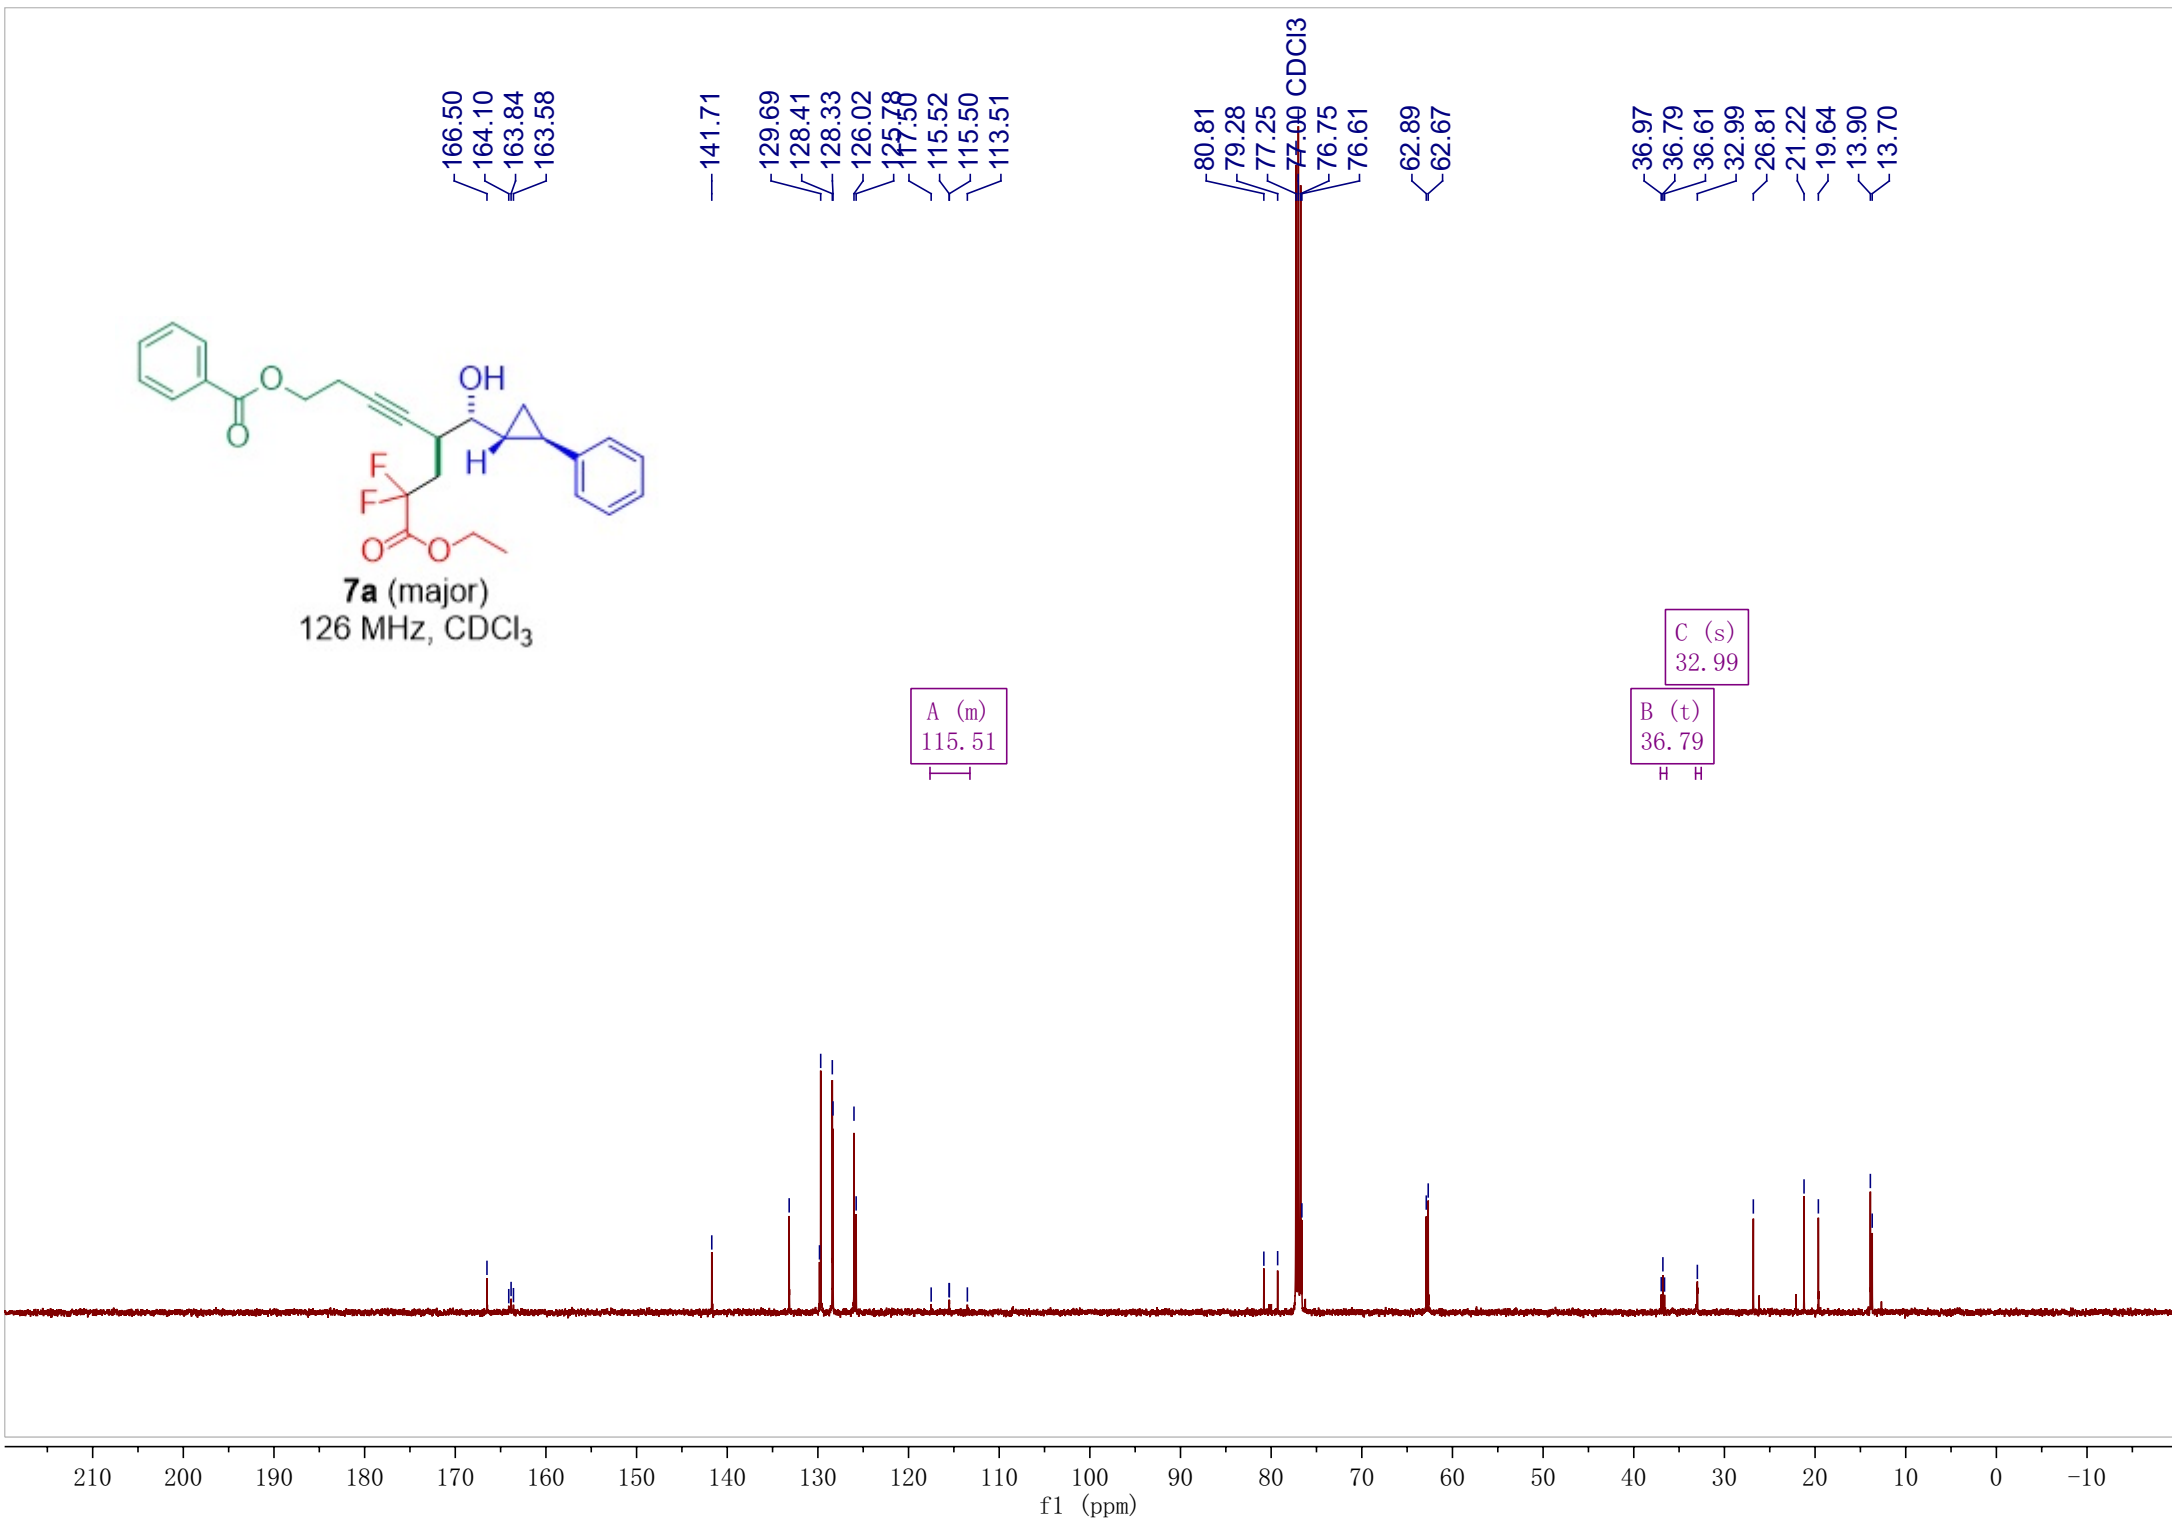



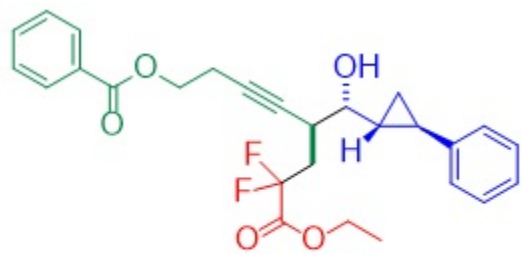

**7a (major)**  
471 MHz, CDCl<sub>3</sub>

102.66  
102.69  
102.72  
103.21  
103.25  
103.28  
105.89  
105.93  
105.97  
106.44  
106.48  
106.52

1.00

0.99

f1 (ppm)

-85

-90

-95

-100

-105

-110

-115

-120

-125

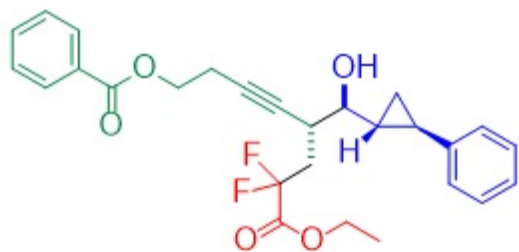

**7b (minor)**  
500 MHz, CDCl<sub>3</sub>

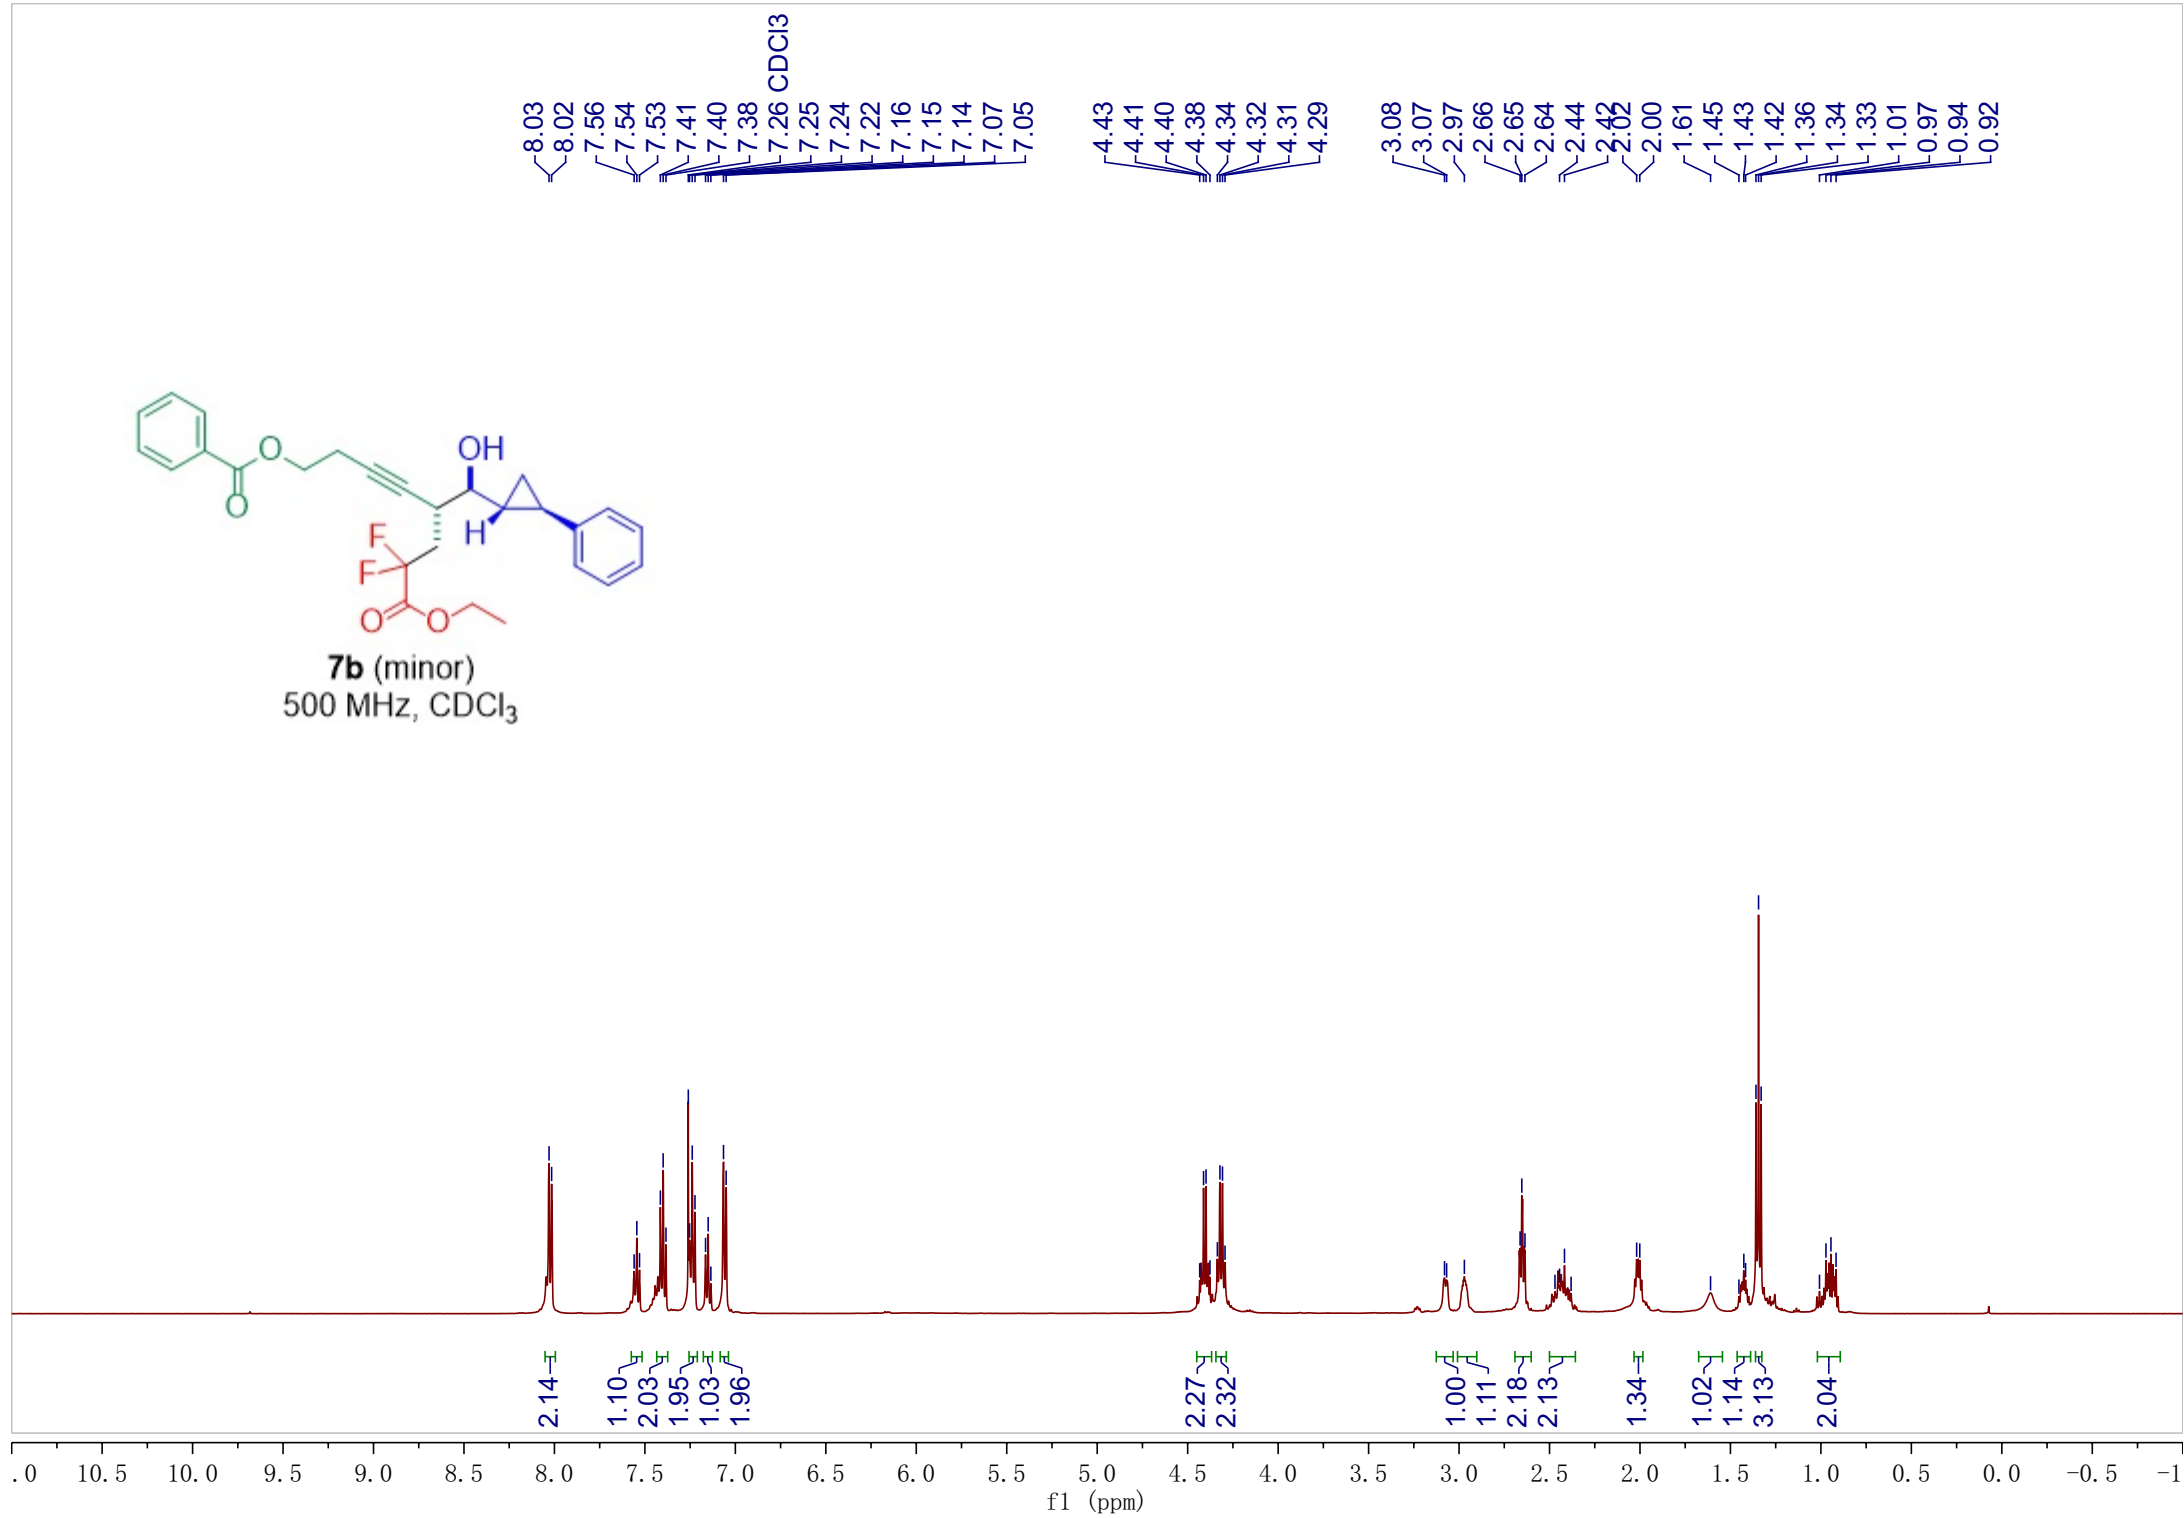

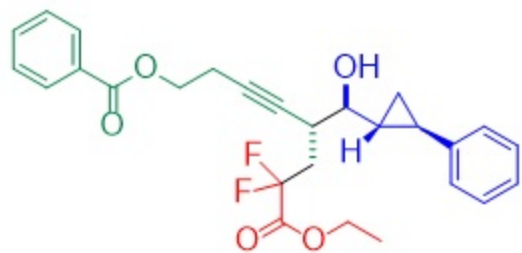

**7b (minor)**  
126 MHz, CDCl<sub>3</sub>

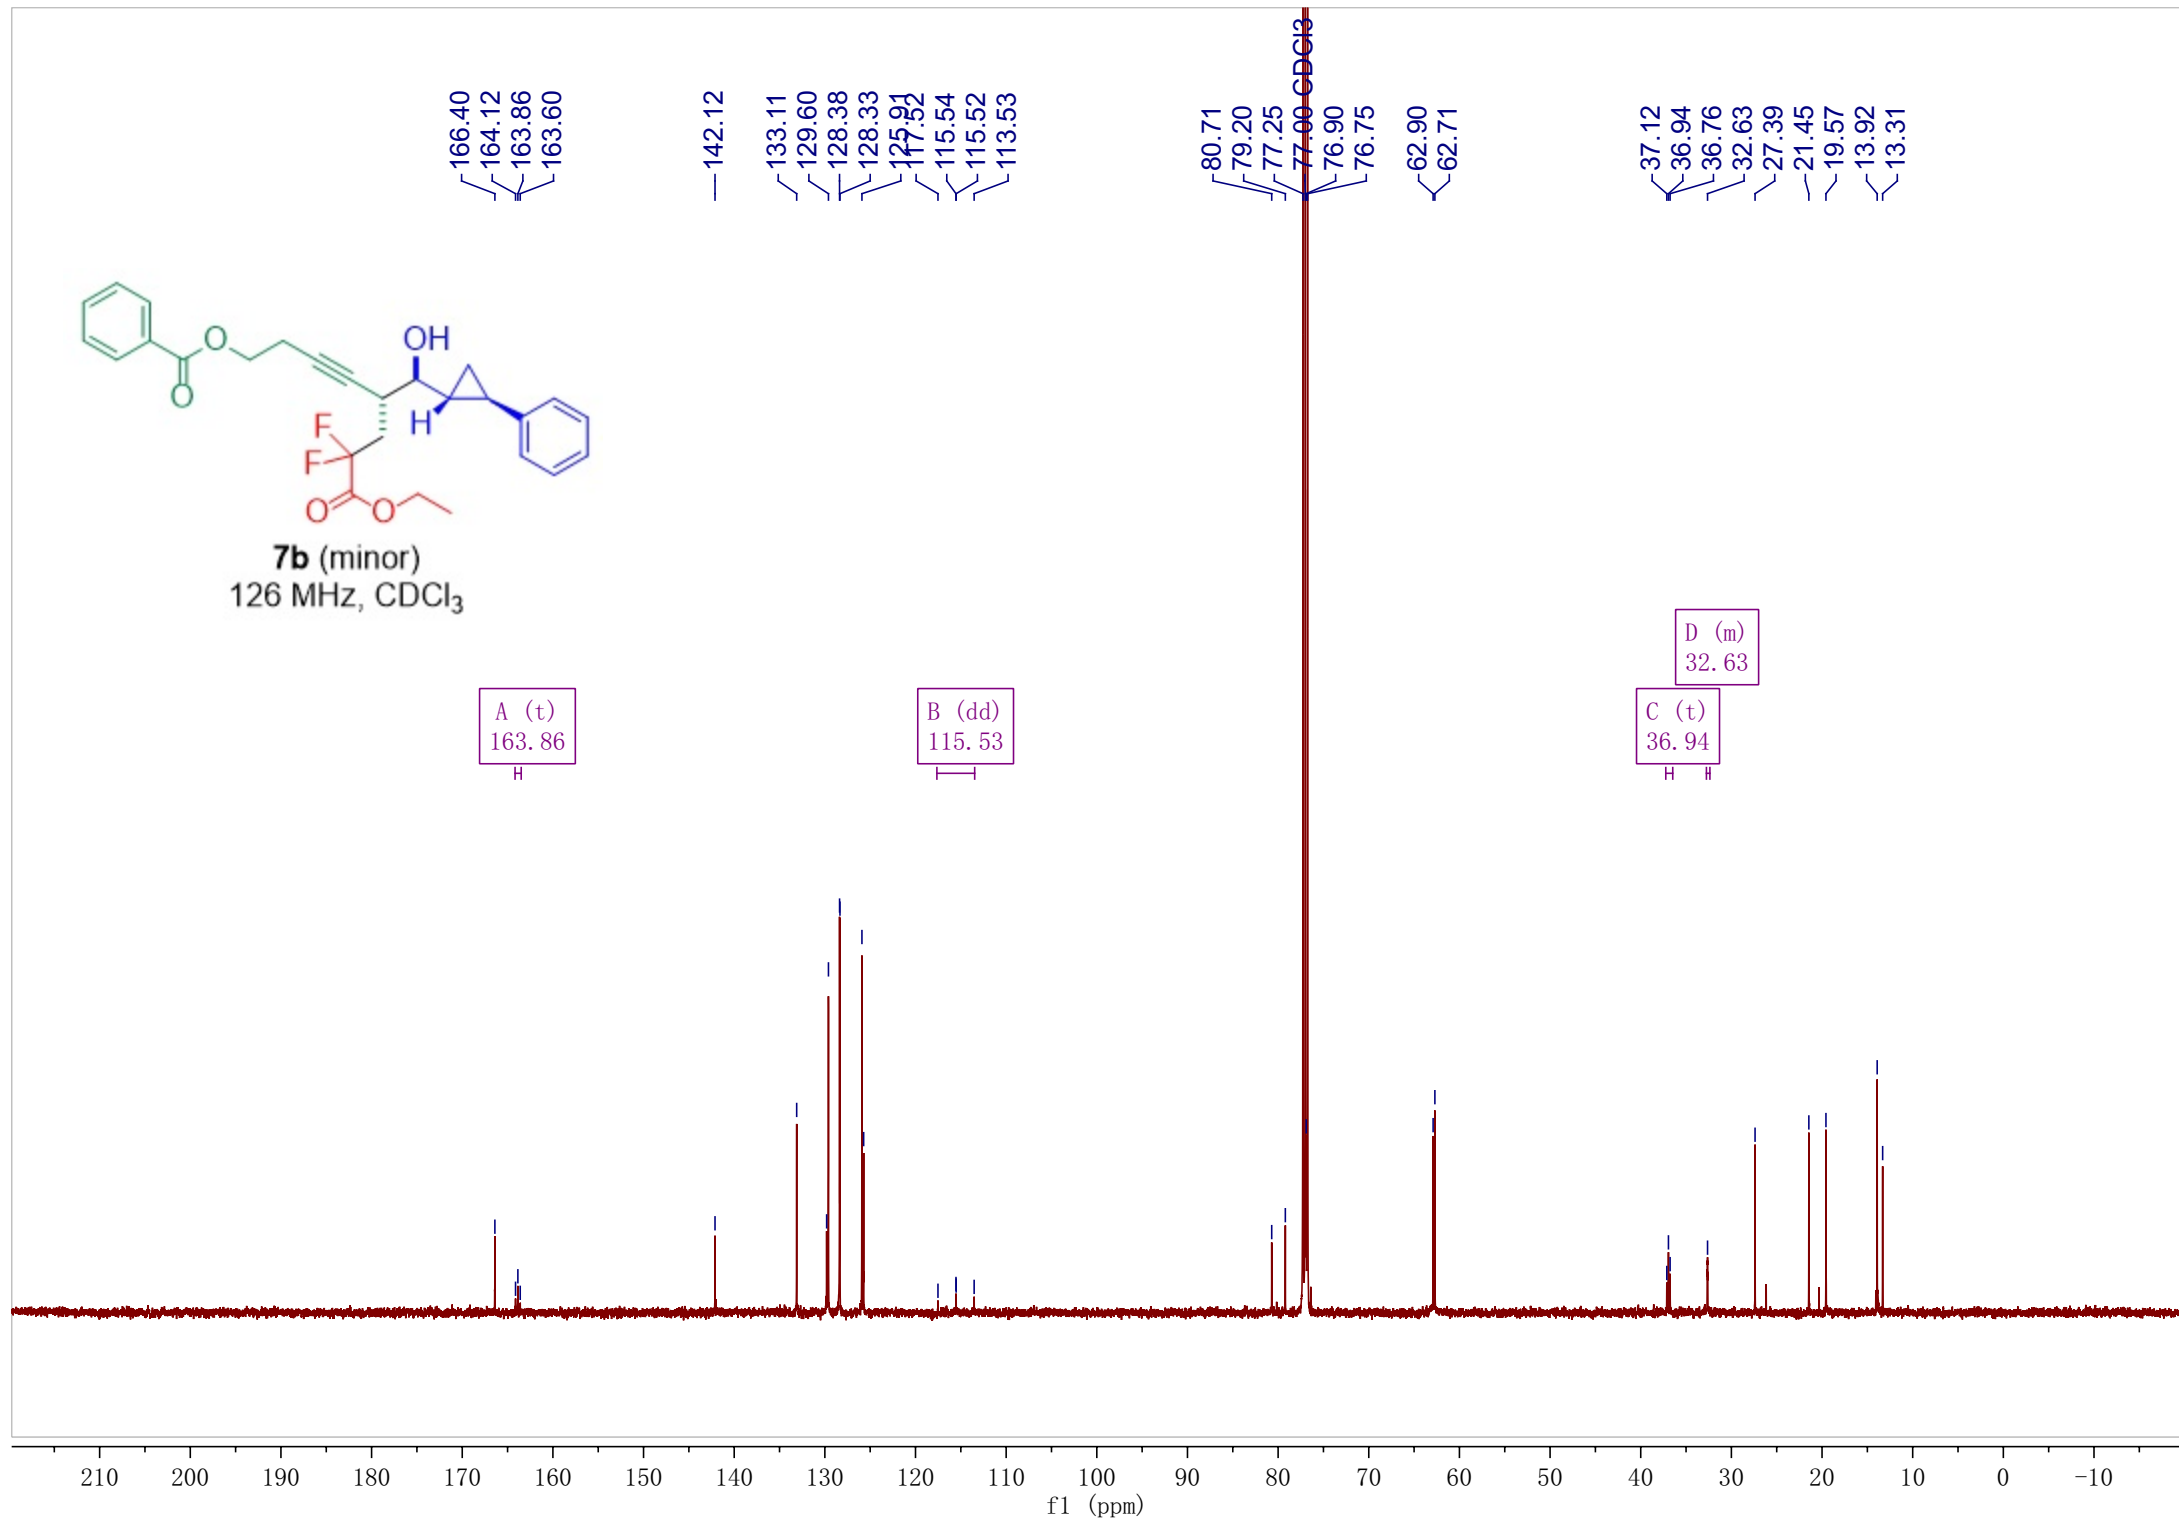

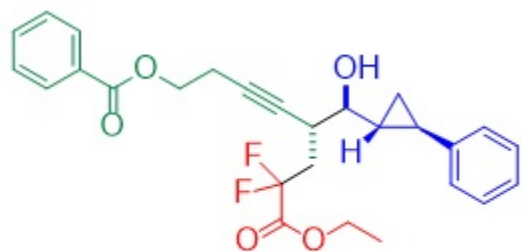

**7b** (minor)  
471 MHz, CDCl<sub>3</sub>

102.75  
102.78  
102.82  
103.31  
103.34  
103.37  
105.93  
105.97  
106.00  
106.48  
106.52  
106.56

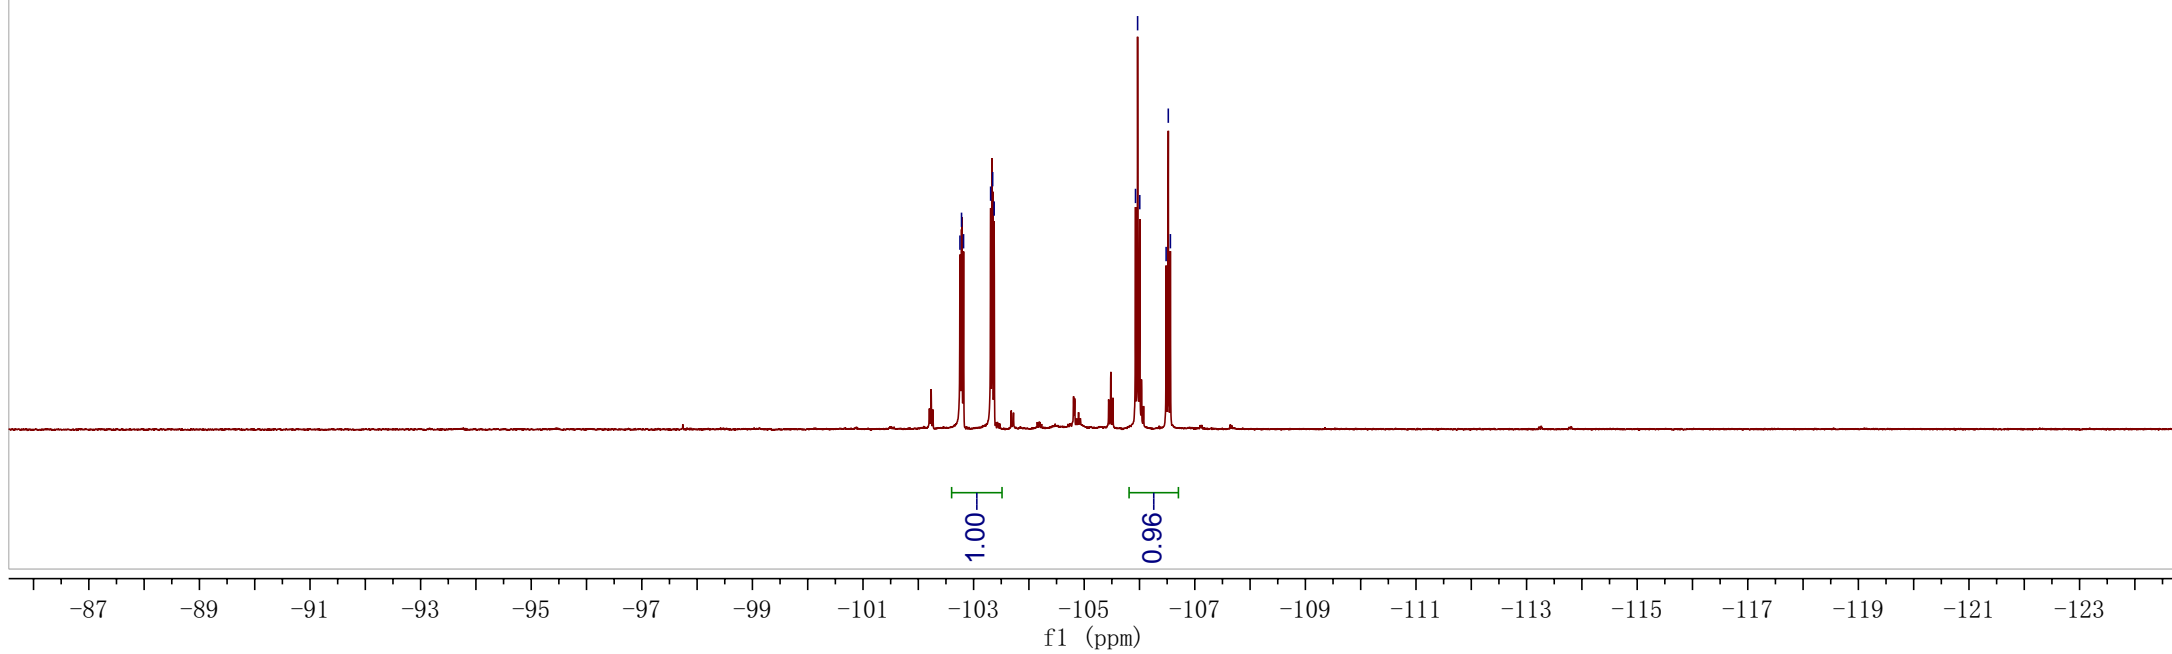

Supplement: d3qo01522j1.pdf [file d3qo01522j1.pdf]
